# Supplementary material for: Systematic review of prediction models for pulmonary tuberculosis treatment outcomes in adults
Source: PubMed Central journal article supplement — BMJ Open. 2021 Mar 2;11(3):e044687. doi: 10.1136/bmjopen-2020-044687 (PMC7929865; doi:10.1136/bmjopen-2020-044687), 2021-03-02
Supplement: bmjopen-2020-044687.draft_revisions.pdf [file bmjopen-2020-044687.draft_revisions.pdf]

# BMJ Open

BMJ Open is committed to open peer review. As part of this commitment we make the peer review history of every article we publish publicly available.

When an article is published we post the peer reviewers' comments and the authors' responses online. We also post the versions of the paper that were used during peer review. These are the versions that the peer review comments apply to.

The versions of the paper that follow are the versions that were submitted during the peer review process. They are not the versions of record or the final published versions. They should not be cited or distributed as the published version of this manuscript.

BMJ Open is an open access journal and the full, final, typeset and author-corrected version of record of the manuscript is available on our site with no access controls, subscription charges or pay-per-view fees (<http://bmjopen.bmj.com>).

If you have any questions on BMJ Open's open peer review process please email [info.bmjopen@bmj.com](mailto:info.bmjopen@bmj.com)

# BMJ Open

## A systematic review of prediction models for tuberculosis treatment outcomes

|                               |                                                                                                                                                                                                                                                                                                                                                                                                                                                                                                                                                       |
|-------------------------------|-------------------------------------------------------------------------------------------------------------------------------------------------------------------------------------------------------------------------------------------------------------------------------------------------------------------------------------------------------------------------------------------------------------------------------------------------------------------------------------------------------------------------------------------------------|
| Journal:                      | <i>BMJ Open</i>                                                                                                                                                                                                                                                                                                                                                                                                                                                                                                                                       |
| Manuscript ID                 | bmjopen-2020-044687                                                                                                                                                                                                                                                                                                                                                                                                                                                                                                                                   |
| Article Type:                 | Original research                                                                                                                                                                                                                                                                                                                                                                                                                                                                                                                                     |
| Date Submitted by the Author: | 10-Sep-2020                                                                                                                                                                                                                                                                                                                                                                                                                                                                                                                                           |
| Complete List of Authors:     | Peetluk, Lauren; Vanderbilt University School of Medicine, Epidemiology<br>Ridolfi, Felipe; Instituto Nacional de Infectologia Evandro Chagas<br>Rebeiro, Peter; Vanderbilt University School of Medicine, Epidemiology;<br>Vanderbilt University School of Medicine, Division of Infectious Diseases<br>Liu, Dandan; Vanderbilt University School of Medicine, Biostatistics<br>Rolla, Valeria; Instituto Nacional de Infectologia Evandro Chagas<br>Sterling, Timothy; Vanderbilt University School of Medicine, Division of<br>Infectious Diseases |
| Keywords:                     | Tuberculosis < INFECTIOUS DISEASES, Epidemiology < INFECTIOUS DISEASES, STATISTICS & RESEARCH METHODS                                                                                                                                                                                                                                                                                                                                                                                                                                                 |
|                               |                                                                                                                                                                                                                                                                                                                                                                                                                                                                                                                                                       |

SCHOLARONE™  
Manuscripts

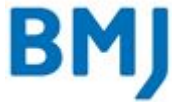

I, the Submitting Author has the right to grant and does grant on behalf of all authors of the Work (as defined in the below author licence), an exclusive licence and/or a non-exclusive licence for contributions from authors who are: i) UK Crown employees; ii) where BMJ has agreed a CC-BY licence shall apply, and/or iii) in accordance with the terms applicable for US Federal Government officers or employees acting as part of their official duties; on a worldwide, perpetual, irrevocable, royalty-free basis to BMJ Publishing Group Ltd ("BMJ") its licensees and where the relevant Journal is co-owned by BMJ to the co-owners of the Journal, to publish the Work in this journal and any other BMJ products and to exploit all rights, as set out in our [licence](#).

The Submitting Author accepts and understands that any supply made under these terms is made by BMJ to the Submitting Author unless you are acting as an employee on behalf of your employer or a postgraduate student of an affiliated institution which is paying any applicable article publishing charge ("APC") for Open Access articles. Where the Submitting Author wishes to make the Work available on an Open Access basis (and intends to pay the relevant APC), the terms of reuse of such Open Access shall be governed by a Creative Commons licence – details of these licences and which [Creative Commons](#) licence will apply to this Work are set out in our licence referred to above.

Other than as permitted in any relevant BMJ Author's Self Archiving Policies, I confirm this Work has not been accepted for publication elsewhere, is not being considered for publication elsewhere and does not duplicate material already published. I confirm all authors consent to publication of this Work and authorise the granting of this licence.

## A systematic review of prediction models for tuberculosis treatment outcomes

Lauren S. Peetluk, MPH,<sup>1</sup> Felipe M. Ridolfi, MD, MSc,<sup>2</sup> Peter F. Rebeiro, PhD, MHS,<sup>1,3</sup> Dandan Liu, PhD,<sup>4</sup> Valeria C. Rolla, MD, PhD,<sup>2</sup> Timothy R. Sterling, MD<sup>3</sup>

<sup>1</sup>Division of Epidemiology, Department of Medicine, Vanderbilt University School of Medicine, Nashville, Tennessee, USA

<sup>2</sup>Instituto Nacional de Infectologia Evandro Chagas (INI) – Fiocruz, Rio de Janeiro, Brazil

<sup>3</sup>Division of Infectious Diseases, Department of Medicine, Vanderbilt University School of Medicine, Nashville, TN, USA

<sup>4</sup>Department of Biostatistics, Vanderbilt University School of Medicine, Nashville, TN, USA

Corresponding author:

Lauren S. Peetluk, MPH

A2209 Medical Center North

1161 21st Avenue South

Nashville, TN 37203

E-mail: [lauren.s.peetluk@vanderbilt.edu](mailto:lauren.s.peetluk@vanderbilt.edu)

Word count main text: 3547

**ABSTRACT (word count: 261)**

**Objective:** To systematically review and critically evaluate prediction models developed to predict tuberculosis (TB) treatment outcomes among persons with pulmonary tuberculosis.

**Design:** Systematic review

**Data sources:** PubMed, Embase, Web of Science, and Google Scholar were searched for studies published January 1, 1995 - January 9, 2020.

**Study selection and data extraction:** Studies that developed a model to predict pulmonary TB treatment outcomes were included. Study screening, data extraction, and quality assessment were conducted independently by two reviewers. Study quality was evaluated using the Prediction model Risk Of Bias Assessment Tool (PROBAST).

**Results:** 14,739 articles were identified, 536 underwent full-text review, and 33 studies presenting 37 prediction models were included. Model outcomes included death (n=16, 43%), treatment failure (n=6, 16%), default (n=6, 16%) or a composite outcome (n=9, 25%). Most models (n=29, 78%) measured discrimination (median c-statistic=0.75; IQR: 0.68-0.84), and 17 (46%) reported calibration, often the Hosmer-Lemeshow test (n=13). Nineteen (51%) models were internally validated, and six (16%) were externally validated. Eighteen studies (54%) mentioned missing data, and of those half (n=9) used complete case analysis. The most common predictors included age, sex, extrapulmonary TB, body mass index (BMI), chest x-ray results, previous TB, and HIV. Risk of bias varied across studies, but all studies had high risk of bias in their analysis.

**Conclusions:** TB outcome prediction models are heterogeneous with disparate outcome definitions, predictors, and methodology. We do not recommend applying any in clinical settings without external validation, and encourage future researchers adhere to guidelines for developing and reporting of prediction models.

1  
2  
3 **Registration:** The study was pre-registered on OSF (<https://osf.io/rz3wp>).  
4  
5  
6  
7  
8  
9  
10  
11  
12  
13  
14  
15  
16  
17  
18  
19  
20  
21  
22  
23  
24  
25  
26  
27  
28  
29  
30  
31  
32  
33  
34  
35  
36  
37  
38  
39  
40  
41  
42  
43  
44  
45  
46  
47  
48  
49  
50  
51  
52  
53  
54  
55  
56  
57  
58  
59  
60

## **ARTICLE SUMMARY:**

### **Strengths and limitations**

- Prediction models for tuberculosis treatment outcomes have the potential to inform interventions or treatment management protocols to promote cure among tuberculosis patients at the greatest risk of unsuccessful treatment outcomes, but the methods and clinical utility of existing models had not been formally evaluated.
- This was the first systematic review of prediction models for tuberculosis treatment outcomes.
- The review used a comprehensive search strategy, conducted thorough bias assessment with the PROBAST tool, and offers recommendations for future model development and validation studies for predicting tuberculosis treatment outcomes.
- Evidence synthesis and quality assessment were limited by incomplete reporting in primary studies
- External validation studies or studies written in languages other than English, Spanish, Portuguese, or French were excluded.

## **BACKGROUND**

Tuberculosis (TB) is one of the top ten causes of death worldwide and a leading cause of death from an infectious disease. In 2018, 10 million people developed TB and 1.45 million people died from it globally, despite widespread availability of curative treatment.(1) Global treatment success was 85% for all new and relapse TB patients in 2018. For HIV-associated TB, it was 75%. These proportions are lower than the End TB Strategy target of  $\geq 90\%$  treatment success.(2)

Heeding early recognition that *Mycobacterium tuberculosis* develops resistance rapidly in response to single-drug therapy, TB has been treated with combination therapy for more than 50 years.(3) Aside from weight-based dosing, the World Health Organization (WHO) and other TB guidelines authorities recommend a standardized approach for treatment of almost all TB patients.(4–6) The current recommendation for treatment of drug-susceptible TB includes 2 months of isoniazid, rifampin, pyrazinamide, and ethambutol, followed by 4 months of isoniazid and rifampin. However, actual treatment regimens may vary due to differences in drug tolerability, and other individual-level factors that can affect TB treatment outcomes.

Due to the long duration of TB treatment, it would be beneficial for TB outcome studies to identify early treatment predictors of unsuccessful TB treatment outcomes to identify patients needing tailored treatment approaches, such as directly observed therapy (DOT) or extended treatment course. Research suggests that individual characteristics, such as HIV, age, undernutrition, diabetes, TB disease severity, extrapulmonary TB, history of TB, adherence, alcohol use, and adverse drug reactions, are associated with unsuccessful TB treatment outcomes, but results vary by setting and patient population.(7–10)



1  
2  
3 Prediction models are defined as any combination or equation of two or more predictors,  
4  
5 such as demographic factors, medical history, physical examination, and lab tests, used for  
6  
7 estimating an individualized probability of a specific endpoint within a defined period of  
8  
9 time.(11) The large number of prediction models for TB outcomes published in recent years  
10  
11 highlights a common desire to identify TB patients at greatest risk of an unsuccessful treatment  
12  
13 outcome in order to tailor treatment strategies and promote cure. However, to date, there has not  
14  
15 been a formal synthesis or quality assessment of existing prediction models for TB treatment  
16  
17 outcomes, which is essential to determine which models should inform clinical practice. This  
18  
19 could also guide development of future models. Thus, we conducted a systematic review to  
20  
21 identify, describe, compare, and synthesize clinical prediction models designed to predict TB  
22  
23 treatment outcomes among persons with pulmonary TB.  
24  
25  
26  
27  
28  
29  
30  
31  
32  
33  
34  
35  
36  
37  
38  
39  
40  
41  
42  
43  
44  
45  
46  
47  
48  
49  
50  
51  
52  
53  
54  
55  
56  
57  
58  
59  
60

## **METHODS AND ANALYSIS**

All steps of the systematic review were carried out according to guidelines set by Cochrane Prognosis Methods Group (PMG) and PROGnosis RESearch Strategy (PROGRESS).(12–14) Reporting adhered to the Preferred Reporting Items for Systematic Reviews and Meta-Analyses (**Supplemental File 1**). This study was pre-registered on OSF (<https://osf.io/rz3wp>).

### **Study eligibility criteria**

The review question was defined according to the PICOTS framework (**Supplemental File 2**). In brief, the goal was to identify prognostic models developed to predict TB treatment outcomes among pulmonary TB cases. The main outcome was unsuccessful TB treatment outcome, defined by the WHO as the combination of death, treatment failure, loss to follow-up, and/or not evaluated, as compared to successful TB treatment outcome, defined as the combination of cure or treatment completion (**Table 1**). Loss to follow-up was sometimes referred to as default or treatment abandonment.

Inclusion criteria were: 1) prognostic model studies with or without external validation(15); 2) study population included adult, drug-susceptible, pulmonary, TB cases; 3) written in English, Spanish, Portuguese, and French; 4) published between January 1, 1995 and January 9, 2020; 5) treatment outcome was one of the following: cure, treatment completion, death, treatment failure, loss to follow-up, or not evaluated.

Exclusion criteria were: 1) predictive value of more than one variable was evaluated but not combined in a prediction model; 2) study population was only multi-drug resistant (MDR) TB cases, only extrapulmonary TB cases, or only children (< 18 years-old); 3) outcome was evaluated during treatment such as: two-month smear/culture conversion, acquired resistance,

1  
2  
3 adverse events, quality of life; 4) long-term outcomes, such as relapse, recurrence, or post-  
4  
5 treatment mortality.  
6

7  
8 The decision to include only articles in English, Spanish, Portuguese, and French was  
9  
10 based on study team capabilities. The dates reflect modern TB treatment practice; first-line TB  
11  
12 treatment regimens were not available until the early 1990s.(16,17) Articles that included a  
13  
14 combination of drug-susceptible and drug-resistant cases, or a combination of children and adults  
15  
16 were included.  
17

### 18 19 **Search strategy and selection criteria**

20  
21 The following electronic databases were searched on January 9, 2020: PubMed, Embase,  
22  
23 Web of Science, and the first 200 references from Google Scholar. This combination of  
24  
25 databases achieved best overall recall for systematic reviews in a recent study.(18)  
26  
27 Clinicaltrials.gov and retractiondatabase.org were also searched for unpublished research.  
28  
29 Reference lists of retrieved articles were checked to identify eligible studies.  
30  
31

32  
33 Search terms relating to the “prediction model” component of the search were adapted  
34  
35 from a PubMed search strategy that captured prediction model studies with sensitivity of  
36  
37 98%.(19) That component was combined with terms relating to TB treatment outcomes. The  
38  
39 search strategy, developed in PubMed, was adapted for all other databases with assistance from a  
40  
41 reference librarian (**Supplemental File 3**).  
42  
43

44  
45 Article selection was conducted in three stages. The first stage was de-duplication and  
46  
47 title screening, carried out using *revtools* in RStudio (version 1.2).(20) Remaining articles were  
48  
49 imported into Covidence, a web-based software platform that streamlines systematic reviews,  
50  
51 where abstracts (Stage 2) and full text (Stage 3) were screened.(21) Stages 2 and 3 were carried  
52  
53 out by two independent reviewers (LSP and FMR). Discordance was discussed between  
54  
55  
56  
57  
58  
59

1  
2  
3 reviewers, and if consensus was not reached, a third party arbitrated (one of TRS, VCR, PFR,  
4  
5 DL). In stage 3, reasons for exclusion were documented according to PRISMA.  
6  
7

## 8 **Data analysis**

9  
10 Data from selected studies were recorded using a database designed in REDCap  
11  
12 (Vanderbilt University).(22,23) Data extraction was informed by the CHECKlist for critical  
13  
14 Appraisal and data extraction for systematic Reviews of prediction Modelling Studies  
15  
16 (CHARMS) and the Prediction Model Risk of Bias Assessment Tool (PROBAST).(15,24,25)  
17  
18 CHARMS checklist and PROBAST are in **Supplemental Files 4 and 5**, respectively.  
19  
20

21 Quality assessment and applicability of included studies was assessed using  
22  
23 PROBAST.(15,25) PROBAST was specifically designed to assess risk of bias of prediction  
24  
25 model studies, which included identifying deficiencies in study design, conduct, or analysis that  
26  
27 led to inaccurate estimates of predictive performance. PROBAST has 4 domains: participants,  
28  
29 predictors, outcome, and analysis with 20 total signaling questions. Each question was answered  
30  
31 on the scale: yes, probably yes, no, probably no, no information. Domains were scored as low,  
32  
33 high, and unclear risk of bias. PROBAST also guides assessment of applicability of participants,  
34  
35 predictors, and outcomes from each included study to the review question.  
36  
37  
38

39 Results were summarized narratively and in tables and figures. Meta-analysis was not  
40  
41 possible due to lack of external validation and use of disparate predictors, outcome definitions,  
42  
43 and modeling methods. For studies that presented multiple models with the same set of  
44  
45 predictors and outcomes, but different methods, the best-performing method was included in data  
46  
47 synthesis. For studies presenting multiple models with different sets of predictors (i.e. baseline  
48  
49 data vs. longitudinal data), the model developed using only baseline data was included. If studies  
50  
51 developed multiple models for different outcomes or with different populations, all models were  
52  
53 included.  
54  
55  
56  
57  
58  
59  
60

### **Patient and public involvement**

Neither patients nor the public were involved in the design, conduct, or reporting of the research, as it was not feasible or appropriate for this systematic review. The study protocol is publicly available at <https://osf.io/rz3wp>.

### **Role of the funding source**

The funder of the study had no role in study design, data collection, data analysis, data interpretation, or writing of the report. The corresponding author had full access to all the data in the study and had final responsibility for the decision to submit for publication.

## **RESULTS**

### **Study selection**

The search identified 14,739 unique studies. After excluding irrelevant titles, 6,426 abstracts were screened, 536 articles underwent full-text review, and 33 model development studies presenting 37 prediction models were included (**Figure 1**).

### **Study characteristics**

Of the 33 studies, most were retrospective cohorts (n=25, 76%), three (9%) were prospective cohort studies, two (6%) were case-control studies, and three (9%) were nested case-control studies. Data from nearly half of studies (n=16, 48%) were collected from surveillance systems; eleven (33%) studies used a data collection form developed specifically for their study and six studies (18%) extracted data from medical records. Median sample size was 803 (interquartile range (IQR): 291-4167). Full details on included studies are in **Table 2**.

Thirteen studies (41%) took place in Asia, eight (25%) in Africa, six (19%) in Europe, four (12%) in North America, and one (3%) included sites in Europe and Argentina. Fewer than half (n=14, 45%) of the studies took place in high-burden TB settings.<sup>1</sup> One study did not report study location. (**Tables 2 and 3**).

Reporting of population characteristics varied by study (**Table 4**). Among 18 studies that reported a measure of central tendency (mean or median) for age, the median of those measures of central tendency was 41 years (IQR: 37-49). Eighteen studies reported including persons living with HIV (PLWH); 5 of these included only TB/HIV patients. Twelve studies reported including persons with diabetes; one of which includes only TB/DM. Eight studies reported including participants with MDR, ten studies included only hospitalized patients, and in 14 studies, all participants were on directly observed therapy (DOT).

### Model characteristics

Model outcomes included death (n=16, 43%), treatment failure (n=6, 16%), default (n=6, 16%) or a composite outcome (n=8, 23%) (**Tables 2 and 5**). The complete outcome definition for all included studies is in **Supplemental File 6**.

Most models were developed using clinical/epidemiologic predictors (n=34, 92%), two (6%) used multiple biomarkers, and one (3%) used adherence data. The most common candidate predictors were age, sex, extrapulmonary TB, smear result, BMI, x-ray findings, and previous TB. The most common predictors retained in the final models were age, sex, extrapulmonary TB, BMI, chest x-ray results, previous TB, and HIV (**Figure 2**).

Only three models (8%) used survival analysis; most models used logistic regression (n=29, 78%) and five (14%) used a machine learning approach. More than half of studies (n=19, 51%) considered variables for inclusion in the multivariable model based on unadjusted associations with the outcome. Model building methods varied widely between models (**Table 5**).

Only 19 (51%) models were internally validated, including ten (53%) split-sample validation, five (26%) bootstrap resampling, and four (21%) cross-validation. Six (16%) models were externally validated.

Many models (n=30, 81%) reported discrimination with c-statistic (concordance statistic) or area under the receiver operating characteristic (AUROC), which are equivalent and quantify the ability of the model to distinguish between patients who do and do not develop an outcome. Only 17 (46%) reported calibration, the agreement between observed and predicted outcomes. Most studies assessed calibration with Hosmer-Lemeshow tests (n=13, 77%); only two studies provided a calibration plot, the preferred reporting method for prediction model

1  
2  
3 studies,(15,26,27) and one reported the calibration slope (**Table 2**). Models were presented a  
4 variety of ways, the most common of which was a weighted risk score (n=16, 43%); details on  
5 model presentation are in **Supplemental File 7**.  
6  
7

### 8 9 10 **Quality assessment**

11  
12 Grading of PROBAST signaling questions is summarized in **Figure 3**, and the summary  
13 risk of bias for the participants, predictors, outcome, and analysis domains and assessment of  
14 applicability are shown in **Figure 4**. More than half of the studies were at low risk of bias for the  
15 population and outcomes domains, but all studies were at high risk of bias in the analysis  
16 domain.  
17  
18  
19  
20  
21  
22

23  
24 Common sources of population bias included use of non-nested case-control  
25 design(28,29), nested case-control design without proper estimation of baseline risk,(30,31) or  
26 inappropriate inclusion/exclusion criteria.(32,33) Sources of predictor bias included lack of  
27 standardized assessment of key predictors (i.e. HIV, diabetes, chest x-ray scoring)(9,28,30,33–  
28 35) or timing of data collection/availability that would limit the intended use of the  
29 model.(9,28,36) Within the outcomes domain, sources of bias included subjective(34) or non-  
30 standard(31,37) outcome measures and inconsistent outcome ascertainment.(28)  
31  
32  
33  
34  
35  
36  
37  
38  
39

40 Bias in the analysis domain was widespread. More than half of the models included were  
41 likely overfit due to low events per variable (EPV) ratios (**Table 5**). Only 6 studies handled  
42 continuous and categorical variables appropriately (i.e., didn't dichotomize continuous variables,  
43 considered non-linearity of continuous variables).(30,38–42) Most studies used complete case-  
44 analysis or did not mention missing data; no study used multiple imputation in their main  
45 analysis. One study with low amounts of missing data (<5%) conducted sensitivity analysis with  
46 multiple imputation.(43) A different study excluded only two people out of a total sample size of  
47  
48  
49  
50  
51  
52  
53  
54  
55  
56  
57  
58  
59  
60



1  
2  
3 1007 with missing data, which would have little impact on model performance.(44) Fewer than  
4  
5 half (n=14) of studies avoided univariable predictor selection, and only three studies used  
6  
7 survival analysis, appropriately accounting for censoring.(35,44,45) Performance measures were  
8  
9 appropriately reported (i.e. calibration assessed with plot and discrimination assessed with c-  
10  
11 statistic/AUROC) in three studies.(40,43,46) Only two studies estimated optimism (degree to  
12  
13 which data are overfit) or accounted for potential overfitting with penalization of model  
14  
15 parameters.(34,40) Ten studies appropriately presented their model with model coefficients or  
16  
17 nomograms, which prevents bias from rounding or transforming model coefficients to generate a  
18  
19 risk score.(29,32,50–54,34,36,37,44,46–49)  
20  
21  
22  
23

24 About half of the models (n=19, 51%) were applicable to the review question in all  
25  
26 domains. However, unclear reporting of target population or predictor and outcome definitions  
27  
28 limited assessment of applicability for several studies.(37,48,49,55,56) Additionally, studies that  
29  
30 included only hospitalized patients with specific laboratory parameters may not be routinely  
31  
32 available in the clinical setting.(38,39,41)  
33  
34  
35  
36  
37  
38  
39  
40  
41  
42  
43  
44  
45  
46  
47  
48  
49  
50  
51  
52  
53  
54  
55  
56  
57  
58  
59  
60

## **DISCUSSION**

In this comprehensive, systematic review of prediction models for pulmonary TB treatment outcomes, we identified 33 model development studies presenting 37 prediction models. These prediction models were developed for predicting death, treatment failure, default, or a composite unfavorable outcome during TB treatment. Most models reported good performance (c-statistic/AUROC>0.7), but all were evaluated to have high risk of bias due to poor reporting, exclusion of missing data, weak methodologic approaches, lack of calibration assessment, and limited validation. Predictor and outcome definitions varied by study and limited comparisons between models.

More than half of the models included in the review were developed in low burden TB settings, and none were developed specifically in South America. Prediction of TB treatment outcome is especially important in high burden TB settings, where resources may be limited, and risk assessment can guide resource allocation toward patients who need the most involved care protocols.

Common risk factors included in the models were consistent with well-established risk factors for poor TB treatment outcomes, including age, sex, HIV, extrapulmonary TB, baseline smear results, and previous TB treatment. Among studies that included PLWH, only three considered factors related to management/severity of HIV, such as receipt of antiretroviral therapy, CD4 cell count, or viral load, which likely impact TB treatment outcomes.(39,45,50) Laboratory values or metabolic biomarkers, such as hemoglobin, hemoglobin A1c or random blood glucose, may also be associated with treatment outcome and worth considering as candidate predictors. There is increasing evidence that diabetes impacts TB treatment outcomes, but caution is warranted about how to best define diabetes in the context of a prediction model to ensure consistency and reproducibility across studies.(57) Behavioral characteristics, such as

1  
2  
3 tobacco use, alcohol use, and drug use were rarely included in final prediction models and are  
4  
5 difficult to collect objectively, suggesting their role in prediction models for TB treatment  
6  
7 outcomes may be limited.  
8  
9

10 Additionally, several studies excluded participants with HIV, diabetes, extrapulmonary  
11  
12 TB, or MDR TB, because these factors negatively influence treatment outcomes. However,  
13  
14 careful consideration should be given to inclusion/exclusion criteria in prediction model studies.  
15  
16 Information necessary to carry out inclusion/exclusions should be available at the of intended use  
17  
18 of the model, which may not always hold for these aforementioned factors.(58) This point is  
19  
20 especially questionable for MDR, given that conventional drug-susceptibility testing results are  
21  
22 not available for several weeks after TB diagnosis; though more recent advances in rapid  
23  
24 molecular methods such as GeneXpert or line-probe assays offer rapid screening for drug  
25  
26 resistance.(59)  
27  
28  
29

30  
31 TB researchers should thoughtfully consider how to appropriately handle complexities of  
32  
33 censoring and competing risks in TB outcomes research. Only three studies in this review used  
34  
35 survival analysis, despite the long duration of TB treatment outcome assessment and relatively  
36  
37 high rates of losses to follow-up across studies. Losses to follow-up were frequently excluded,  
38  
39 which can lead to selection bias. Additionally, all studies that included death as the outcome  
40  
41 considered all-cause mortality. Also, for studies that predict losses to follow-up/default, death  
42  
43 (even due to TB) is a competing risk. Competing risk analyses are common in cardiovascular  
44  
45 research, research in elderly populations, and there are specific recommendations for competing  
46  
47 risk methods in prognostic research.(60,61)  
48  
49  
50

51  
52 Though all included studies were at high risk of bias in the analysis domain, we want to  
53  
54 highlight two studies with some exemplary characteristics.(40,43) Pefura-Yone et al.(40) provide  
55  
56  
57  
58  
59

1  
2  
3 clear explanations of study design, inclusion/exclusion criteria, and data collection procedures;  
4  
5 TB diagnosis and treatment outcome definitions were standard.(62) Non-linearity of continuous  
6  
7 variables was considered with restricted cubic splines, and no continuous variables were  
8  
9 categorized or dichotomized; the final model includes four predictors that are easy to collect and  
10  
11 routinely assessed in most TB control programs, especially those in high burden settings. The  
12  
13 performance of the model was internally validated with bootstrap validation, and the  
14  
15 discrimination (c-statistic=0.808) was corrected for optimism. Model calibration was presented  
16  
17 graphically with calibration plots. The final model was presented as a nomogram with  
18  
19 instructions for use, which facilitates use in external validation studies. Gupta-Wright and  
20  
21 colleagues developed and externally validated a clinical risk score to predict mortality in high-  
22  
23 burden, low-resource settings.<sup>43</sup> They used clinical trial data with very low amounts of missing  
24  
25 data for model development, and externally validated the clinical risk score with data collected  
26  
27 independently from two other studies (a clinical trial and a prospective cohort). Given high  
28  
29 amounts (42%) of missing data in the validation cohort, they conducted sensitivity analysis using  
30  
31 multiple imputation for missing data; the c-statistic differed slightly between complete case and  
32  
33 multiple-imputation analyses in the validation cohort (0.68 vs. 0.64). Candidate predictors were  
34  
35 based on *a priori* clinical knowledge, previous literature, and required variables were objective,  
36  
37 reproducible, and available in low-resource settings, consistent with recommended  
38  
39 approaches.(25,58,63) Additionally, they reported model performance with the c-statistics and  
40  
41 calibration plots for development and validation cohorts, and reported results according to  
42  
43 TRIPOD (transparent reporting of a multivariable prediction model for individual prognosis or  
44  
45 diagnosis) guidance.(26,27) Regardless, each of these models requires external validation prior  
46  
47 to use in clinical practice.  
48  
49  
50  
51  
52  
53  
54  
55  
56  
57  
58  
59  
60

1  
2  
3  
4  
5  
6  
7  
8  
9  
10  
11  
12  
13  
14  
15  
16  
17  
18  
19  
20  
21  
22  
23  
24  
25  
26  
27  
28  
29  
30  
31  
32  
33  
34  
35  
36  
37  
38  
39  
40  
41  
42  
43  
44  
45  
46  
47  
48  
49  
50  
51  
52  
53  
54  
55  
56  
57  
58  
59  
60

There are several limitations of this study. First, data extraction was subject to reporting the primary study, which varied widely across studies. Most studies reported discrimination, and several reported sensitivity and specificity; TRIPOD recommends all studies report, at minimum, calibration with a calibration plot and discrimination with c-statistic.(27) Measures of sensitivity and specificity require dichotomization of risks, which then only pertain to a specific risk stratum, rather than quantifying the overall model performance.(14,63) We did not include external validation studies, which is an essential step for translation to clinical practice. However, several studies in the review did not include the full model equation, which inhibits their ability to be externally validated. Upon searching for studies that externally validated prediction models in this review, we found three studies(64–66) that evaluated the same model (TBscore).(35) Briefly, these studies evaluated the ability of TBscore to monitor treatment response in a new setting(64), refined the instrument (TBscoreII) using exploratory factor analysis(65), and then evaluated TBscoreII for use in patients with TB/HIV.(66) To our knowledge, no other studies included in the review were externally validated by other sources. Finally, we excluded 10 studies that were not available in English, Spanish, Portuguese, or French; all abstracts were available in English, and none reported model performance metrics, so they likely would have been excluded for different reasons regardless.

The findings of this review not only serve as a comprehensive overview of existing TB outcome prediction models but can act as a resource for future model development and validation of prediction models for TB treatment outcomes. We encourage researchers to focus future TB outcome prediction models on easily collected and readily available predictors that are widely generalizable. We highlight age, sex, extrapulmonary TB, BMI, chest x-ray results, previous TB, and HIV as common predictors of TB treatment outcomes. Additionally, when

1  
2  
3 building a new prediction model, it is recommended to first prune the set of considered  
4 predictors based on expert opinion and previous literature, rather than univariable analysis or  
5 variable selection processes(25,58,63) Future model development or validation studies should  
6 adhere to the TRIPOD guidelines, which provide a 22-item checklist and aims to improve the  
7 reporting of prediction model development studies.(26,27) We also encourage researchers  
8 consider the PROBAST criteria when developing their model to limit sources of bias in design  
9 and conduct of prediction model studies.  
10  
11  
12  
13  
14  
15  
16  
17  
18

19 Prediction models are an important tool in TB management, as they can lay the  
20 foundation for future intervention studies or clinical decision making by providing risk  
21 prediction that can aid in targeted treatment, resource allocation, or intensive case management  
22 at patients who are least likely to achieve cure and most likely to benefit from some form of  
23 intervention, especially in high-burden and low-resources areas. Though our findings suggest  
24 that none of the existing models are ready for clinical application without extensive external  
25 validation, we hope they direct future researchers to make use of guidelines for development and  
26 reporting of prediction models.  
27  
28  
29  
30  
31  
32  
33  
34  
35  
36  
37  
38  
39  
40  
41  
42  
43  
44  
45  
46  
47  
48  
49  
50  
51  
52  
53  
54  
55  
56  
57  
58  
59  
60

## **FOOTNOTES**

**Ethics approval:** Not required.

**Transparency statement:** The lead author affirms that the manuscript is an honest, accurate, and transparent account of the study being reported. No important aspects of the study have been omitted, and any discrepancies from the study as planned were explained.

**Contributorship:** LSP conceptualized the research question, designed the protocol, and drafted the manuscript. LSP and FMR screened studies. FMR, PFR, DL, VCR and TRS provided feedback on the research design, original protocol, and revised successive drafts of the manuscript. All authors approved the final version of the manuscript.

**Funding:** This work was supported by the National Center for Advancing Translational Sciences [CTSA Award No. TL1TR000447 to L.S.P.]. Its contents are solely the responsibility of the authors and do not necessarily represent the official views the National Center for Advancing Translational Sciences or the National Institutes of Health.

**Competing interests:** None declared.

**Data sharing:** The study protocol is available online at <https://osf.io/rz3wp>. Most included studies are publicly available. Additional data and code are available upon request.

**Exclusive license:** This is an Open Access article distributed in accordance with the terms of the Creative Commons Attribution (CC BY 4.0) license, which permits others to distribute, remix, adapt and build upon this work, for commercial use, provided the original work is properly cited.

See: <http://creativecommons.org/licenses/by/4.0/>.

## REFERENCES

1. Global Tuberculosis Report 2019. In Geneva: World Health Organization; 2019. p. Licence: CC BY-NC-SA 3.0 IGO.
2. The END TB Strategy. Geneva: World Health Organization; 2015.
3. Kerantzas CA, Jacobs WR. Origins of Combination Therapy for Tuberculosis: Lessons for Future Antimicrobial Development and Application. *MBio*. 2017 May 3;8(2):e01586-16.
4. Nahid P, Dorman SE, Alipanah N, Barry PM, Brozek JL, Cattamanchi A, et al. Official American Thoracic Society/Centers for Disease Control and Prevention/Infectious Diseases Society of America Clinical Practice Guidelines: Treatment of Drug-Susceptible Tuberculosis. *Clin Infect Dis*. 2016;63(7):e147–95.
5. Guidelines for treatment of drug-susceptible tuberculosis and patient care, 2017 update. In Geneva: World Health Organization; 2017. p. Licence: CC BY-NC-SA 3.0 IGO.
6. WHO consolidated guidelines on drug-resistant tuberculosis treatment. In Geneva: World Health Organization; 2019. p. Licence: CC BY-NC-SA 3.0 IGO.
7. Vasankari T, Holmström P, Ollgren J, Liippo K, Kokki M, Ruutu P. Risk factors for poor tuberculosis treatment outcome in Finland: A cohort study. *BMC Public Health*. 2007;7:1–9.
8. Ramachandran G, Agibothu K. Factors Influencing Tuberculosis Treatment Outcome in Adult Patients Treated with Thrice-Weekly Regimens. 2017;61(5):1–12.
9. Abdelbary BE, Garcia-Viveros M, Ramirez-Oropesa H, Rahbar MH, Restrepo BI. Predicting treatment failure, death and drug resistance using a computed risk score among newly diagnosed TB patients in Tamaulipas, Mexico. *Epidemiol Infect*. 2017;145(14):3020–34.
10. Torres NMC, Rodríguez JJQ, Andrade PSP, Arriaga MB, Netto EM. Factors predictive of



- 1  
2  
3 the success of tuberculosis treatment: A systematic review with meta-analysis. PLoS One.  
4  
5 2019;14(12):1–24.  
6  
7  
8 11. Steyerberg EW, Moons KGM, van der Windt DA, Hayden JA, Perel P, Schroter S, et al.  
9  
10 Prognosis Research Strategy (PROGRESS) 3: Prognostic Model Research. PLoS Med.  
11  
12 2013 Feb 5;10(2):e1001381.  
13  
14  
15 12. Riley R, Ridley G, Williams K, Altman D, Hayden J, De V. Prognosis research: towards  
16  
17 evidence-based results and a Cochrane methods group. 2014;60:863–5.  
18  
19  
20 13. Moons KG, Hooft L, Williams K, Hayden JA, Damen JA, Riley RD. Implementing  
21  
22 systematic reviews of prognosis studies in Cochrane. Cochrane database Syst Rev.  
23  
24 2018;10:ED000129.  
25  
26  
27 14. Debray TPA, Damen JAAG, Snell KIE, Ensor J, Hooft L, Reitsma JB, et al. A guide to  
28  
29 systematic review and meta-analysis of prediction model performance. BMJ. 2017;356.  
30  
31  
32 15. Wolff RF, Moons KGM, Riley RD, Whiting PF, Westwood M, Collins GS, et al.  
33  
34 PROBAST: A tool to assess the risk of bias and applicability of prediction model studies.  
35  
36 Ann Intern Med [Internet]. 2019;170(1):51–8. Available from:  
37  
38 <http://annals.org/article.aspx?doi=10.7326/M18-1376>  
39  
40  
41 16. Iseman MD. Tuberculosis therapy: past, present and future. Eur Resp J [Internet]. 2002  
42  
43 [cited 2019 Feb 25];20(36):87s-94s. Available from:  
44  
45 [https://erj.ersjournals.com/content/erj/20/36\\_suppl/87S.full.pdf](https://erj.ersjournals.com/content/erj/20/36_suppl/87S.full.pdf)  
46  
47  
48 17. Council STSMR. Clinical trial of six-month and four-month regimens of chemotherapy in  
49  
50 the treatment of pulmonary tuberculosis: the results up to 30 months. Tubercle. 1981;95–  
51  
52 102.  
53  
54  
55 18. Bramer WM, Rethlefsen ML, Kleijnen J, Franco OH. Optimal database combinations for  
56  
57  
58  
59  
60

- 1  
2  
3 literature searches in systematic reviews: A prospective exploratory study. *Syst Rev*.  
4  
5 2017;6(1):1–12.  
6  
7  
8 19. Geersing GJ, Bouwmeester W, Zuihthoff P, Spijker R, Leeflang M, Moons K. Search  
9  
10 filters for finding prognostic and diagnostic prediction studies in medline to enhance  
11  
12 systematic reviews. *PLoS One*. 2012;7(2):3–8.  
13  
14  
15 20. Westgate MJ. revtools: An R package to support article screening for evidence synthesis.  
16  
17 *Res Synth Methods*. 2019;10(4):606–14.  
18  
19  
20 21. Veritas Health Innovation, Melbourne A. Covidence systematic review software.  
21  
22 Covidence. Melbourne, Australia: Veritas Health Innovation; 2016.  
23  
24  
25 22. Harris PA, Taylor R, Minor BL, Elliott V, Fernandez M, O’Neal L, et al. The REDCap  
26  
27 consortium: Building an international community of software platform partners. *J Biomed*  
28  
29 *Inform [Internet]*. 2019;95(April):103208. Available from:  
30  
31 <https://doi.org/10.1016/j.jbi.2019.103208>  
32  
33  
34 23. Harris PA, Taylor R, Thielke R, Payne J, Gonzalez N, Conde JG. Research electronic data  
35  
36 capture (REDCap)-A metadata-driven methodology and workflow process for providing  
37  
38 translational research informatics support. *J Biomed Inform [Internet]*. 2009;42(2):377–  
39  
40 81. Available from: <http://dx.doi.org/10.1016/j.jbi.2008.08.010>  
41  
42  
43 24. Moons KGM, de Groot JAH, Bouwmeester W, Vergouwe Y, Mallett S, Altman DG, et al.  
44  
45 Critical Appraisal and Data Extraction for Systematic Reviews of Prediction Modelling  
46  
47 Studies: The CHARMS Checklist. *PLoS Med*. 2014;11(10).  
48  
49  
50 25. Moons KGM, Wolff RF, Riley RD, Whiting PF, Westwood M, Collins GS, et al.  
51  
52 PROBAST: A tool to assess risk of bias and applicability of prediction model studies:  
53  
54 Explanation and elaboration. *Ann Intern Med [Internet]*. 2019 Jan 1;170(1):W1–33.  
55  
56  
57  
58  
59  
60

- 1  
2  
3 Available from: <http://annals.org/article.aspx?doi=10.7326/M18-1376>  
4  
5  
6 26. Moons KGM, Altman DG, Reitsma JB, Ioannidis JPA, Macaskill P, Steyerberg EW, et al.  
7  
8 Transparent reporting of a multivariable prediction model for individual prognosis or  
9  
10 diagnosis (TRIPOD): Explanation and elaboration. *Ann Intern Med.* 2015;162(1):W1–73.  
11  
12  
13 27. Collins GS, Reitsma JB, Altman DG, Moons KGM. Transparent Reporting of a  
14  
15 multivariable prediction model for Individual Prognosis Or Diagnosis (TRIPOD): The  
16  
17 TRIPOD Statement. 2015;162(1).  
18  
19  
20 28. Cherkaoui I, Sabouni R, Ghali I, Kizub D, Billieux AC, Bennani K, et al. Treatment  
21  
22 default amongst patients with tuberculosis in urban Morocco: Predicting and explaining  
23  
24 default and post-default sputum smear and drug susceptibility results. *PLoS One.*  
25  
26 2014;9(4).  
27  
28  
29 29. Keane VP, De Klerk N, Krieng T, Hammond G, Musk W. Risk factors for the  
30  
31 development of non-response to first-line treatment for tuberculosis in Southern Vietnam.  
32  
33 *Int J Epidemiol [Internet].* 1997;26(5):1115–20. Available from: NA  
34  
35  
36 30. Chang KC, Leung CC, Tam CM. Risk factors for defaulting from anti-tuberculosis  
37  
38 treatment under directly observed treatment in Hong Kong. *Int J Tuberc Lung Dis.*  
39  
40 2004;8(12):1492–8.  
41  
42  
43 31. Chee CBE, Boudville IC, Chan SP, Zee YK, Wang YT. Patient and disease  
44  
45 characteristics, and outcome of treatment defaulters from the Singapore TB control unit -  
46  
47 A one-year retrospective survey. *Int J Tuberc Lung Dis [Internet].* 2000;4(6):496–503.  
48  
49 Available from: NA  
50  
51  
52 32. Luies L, Reenen M Van, Ronacher K, Walzl G, Loots DT. Predicting tuberculosis  
53  
54 treatment outcome using metabolomics. *Biomark Med [Internet].* 2017;11(12):1057–67.  
55  
56  
57  
58  
59  
60

- 1  
2  
3 Available from: <http://www.futuremedicine.com/loi/bmm>  
4  
5  
6 33. Killian JA, Wilder B, Sharma A, Choudhary V, Dilkina B, Tambe M. Learning to  
7  
8 Prescribe Interventions for Tuberculosis Patients Using Digital Adherence Data. *Knowl*  
9  
10 *Discov DATA Min* [Internet]. 2019;NA(NA):2430–8. Available from: NA  
11  
12  
13 34. Belilovsky EM, Borisov SE, Cook EF, Shaykevich S, Jakubowiak WM, Kourbatova E V.  
14  
15 Treatment interruptions among patients with tuberculosis in Russian TB hospitals. *Int J*  
16  
17 *Infect Dis* [Internet]. 2010;14(8):e698–703. Available from:  
18  
19 <http://dx.doi.org/10.1016/j.ijid.2010.03.001>  
20  
21  
22 35. Wejse C, Gustafson P, Nielsen J, Gomes VF, Aaby P, Andersen PL, et al. TBscore: Signs  
23  
24 and symptoms from tuberculosis patients in a low-resource setting have predictive value  
25  
26 and may be used to assess clinical course. *Scand J Infect Dis*. 2008;40(2):111–20.  
27  
28  
29 36. Nguyen DT, Graviss EA. Development and validation of a risk score to predict mortality  
30  
31 during TB treatment in patients with TB-diabetes comorbidity. *BMC Infect Dis* [Internet].  
32  
33 2019;19(1):10. Available from: <http://www.biomedcentral.com/bmcinfectdis/>  
34  
35  
36 37. Kalhori SRN, Zeng X. Fuzzy Logic Approach to Predict the Outcome of Tuberculosis  
37  
38 Treatment Course Destination. *Lect Notes Eng Comput Sci*. 2009;2179(1):774–8.  
39  
40  
41 38. Horita N, Miyazawa N, Yoshiyama T, Kojima R, Omori N, Kaneko T, et al. Poor  
42  
43 performance status is a strong predictor for death in patients with smear-positive  
44  
45 pulmonary TB admitted to two Japanese hospitals. *Trans R Soc Trop Med Hyg*.  
46  
47 2013;107(7):451–6.  
48  
49  
50 39. Koegelenberg CFN, Balkema CA, Jooste Y, Taljaard JJ, Irusen EM. Validation of a  
51  
52 severity-of-illness score in patients with tuberculosis requiring intensive care unit  
53  
54 admission. *South African Med J*. 2015;105(5):389–92.  
55  
56  
57  
58  
59  
60

- 1  
2  
3 40. Pefura-Yone EW, Kuaban C, Assamba-Mpom SA, Moifo B, Kengne AP. Derivation,  
4 validation and comparative performance of a simplified chest X-ray score for assessing  
5 the severity and outcome of pulmonary tuberculosis. *Clin Respir J*. 2015;9(2):157–64.  
6  
7  
8  
9  
10 41. Valade S, Raskine L, Aout M, Malissin I, Brun P, Deye N, et al. Tuberculosis in the  
11 intensive care unit: A retrospective descriptive cohort study with determination of a  
12 predictive fatality score. *Can J Infect Dis Med Microbiol*. 2012;23(4):173–8.  
13  
14  
15  
16  
17 42. Wang Q, Han W, Niu J, Sun B, Dong W, Li G. Prognostic value of serum macrophage  
18 migration inhibitory factor levels in pulmonary tuberculosis. *Respir Res* [Internet].  
19 2019;20(1):50. Available from: <http://respiratory-research.com/home/>  
20  
21  
22  
23  
24 43. Gupta-Wright A, Corbett EL, Wilson D, Van Oosterhout JJ, Dheda K, Huerga H, et al.  
25 Risk score for predicting mortality including urine lipoarabinomannan detection in  
26 hospital inpatients with HIV-associated tuberculosis in sub-Saharan Africa: Derivation  
27 and external validation cohort study. *PLoS Med* [Internet]. 2019;16(4):1–20. Available  
28 from: <http://dx.plos.org/10.1371/journal.pmed.1002776>  
29  
30  
31  
32  
33  
34  
35 44. Zhang Z, Xu L, Pang X, Zeng Y, Hao Y, Wang Y, et al. A Clinical scoring model to  
36 predict mortality in HIV/TB co-infected patients at end stage of AIDS in China: An  
37 observational cohort study. *Biosci Trends*. 2019;13(2):136–44.  
38  
39  
40  
41  
42 45. Podlekareva DN, Grint D, Post FA, Mocroft A, Pantelev AM, Miller RF, et al. Health  
43 care index score and risk of death following tuberculosis diagnosis in HIV-positive  
44 patients. *Int J Tuberc Lung Dis* [Internet]. 2013;17(2):198-206+i. Available from:  
45 <http://www.ncbi.nlm.nih.gov/pubmed/23317955>  
46  
47  
48  
49  
50  
51 46. Baussano I, Pivetta E, Vizzini L, Abbona F, Bugiani M. Predicting tuberculosis treatment  
52 outcome in a low-incidence area. *Int J Tuberc Lung Dis*. 2008;12(12):1441–8.  
53  
54  
55  
56  
57  
58  
59

- 1  
2  
3 47. Costa-Veiga A, Briz T, Nunes C. Unsuccessful treatment in pulmonary tuberculosis:  
4 Factors and a consequent predictive model. *Eur J Public Health*. 2018;28(2):252–8.  
5  
6  
7 48. Niakan Kalthori SR, Nasehi M, Zeng XJ. A logistic regression model to predict high risk  
8 patients to fail in tuberculosis treatment course completion. *IAENG Int J Appl Math*.  
9 2010;40(2):1–6.  
10  
11 49. Kalthori SRN, Zeng X-J. PREDICTING THE OUTCOME OF TUBERCULOSIS  
12 TREATMENT COURSE IN FRAME OF DOTS - From Demographic Data to Logistic  
13 Regression Model. In: *Proceedings of the International Conference on Health Informatics*  
14 [Internet]. SciTePress - Science and and Technology Publications; 2009. p. 129–34.  
15 Available from:  
16 <http://www.scitepress.org/DigitalLibrary/Link.aspx?doi=10.5220/0001431401290134>  
17  
18 50. Madan C, Chopra KK, Satyanarayana S, Surie D, Chadha V, Sachdeva KS, et al.  
19 Developing a model to predict unfavourable treatment outcomes in patients with  
20 tuberculosis and human immunodeficiency virus co-infection in Delhi, India. Dholakia  
21 YN, editor. *PLoS One* [Internet]. 2018 Oct 3;13(10):e0204982. Available from:  
22 <http://dx.doi.org/10.1371/journal.pone.0204982>  
23  
24 51. Nguyen DT, Jenkins HE, Graviss EA. Prognostic score to predict mortality during TB  
25 treatment in TB / HIV co-infected patients. *PLoS One*. 2018;13(4):1–12.  
26  
27 52. Nguyen DT, Graviss EA. Development and validation of a prognostic score to predict  
28 tuberculosis mortality. *J Infect*. 2018;77(4):283–90.  
29  
30 53. Pefura-Yone EW, Balkissou AD, Poka-Mayap V, Fatime-Abaicho HK, Enono-Edende  
31 PT, Kengne AP. Development and validation of a prognostic score during tuberculosis  
32 treatment. *BMC Infect Dis*. 2017;17(1):1–9.  
33  
34  
35  
36  
37  
38  
39  
40  
41  
42  
43  
44  
45  
46  
47  
48  
49  
50  
51  
52  
53  
54  
55  
56  
57  
58  
59  
60

- 1  
2  
3 54. Rodrigo T, Caylà JA, Casals M, García-García JM, Caminero JA, Ruiz-Manzano J, et al.  
4  
5 A predictive scoring instrument for tuberculosis lost to follow-up outcome. *Respir Res*.  
6  
7 2012;13:1–9.  
8  
9  
10 55. Hussain OA, Junejo KN. Predicting treatment outcome of drug-susceptible tuberculosis  
11  
12 patients using machine-learning models. *Informatics Heal Soc Care*. 2019;44(2):135–51.  
13  
14 56. Sauer CM, Sasson D, Paik KE, McCague N, Celi LA, Fernández IS, et al. Feature  
15  
16 selection and prediction of treatment failure in tuberculosis. *PLoS One*. 2018;13(11):1–14.  
17  
18 57. Huangfu P, Ugarte-Gil C, Golub J, Pearson F, Critchley J. The effects of diabetes on  
19  
20 tuberculosis treatment outcomes: an updated systematic review and meta-analysis. *Int J*  
21  
22 *Tuberc Lung Dis* [Internet]. 2019;23(7):783–96. Available from: NA  
23  
24  
25 58. Steyerberg EW. *Clinical Prediction Models* [Internet]. Springer. New York, NY: Springer  
26  
27 New York; 2009. (Statistics for Biology and Health). Available from:  
28  
29 <http://link.springer.com/10.1007/978-0-387-77244-8>  
30  
31  
32 59. Sharma SK, Dheda K. What is new in the WHO consolidated guidelines on drug-resistant  
33  
34 tuberculosis treatment? Vol. 149, *The Indian journal of medical research*. 2019. p. 309–  
35  
36 12.  
37  
38  
39 60. Wolbers M, Koller MT, Wittelman JCM, Steyerberg EW. Prognostic models with  
40  
41 competing risks methods and application to coronary risk prediction. *Epidemiology*.  
42  
43 2009;20(4):555–61.  
44  
45 61. Austin PC, Lee DS, Fine JP. Introduction to the Analysis of Survival Data in the Presence  
46  
47 of Competing Risks. *Circulation*. 2016;133(6):601–9.  
48  
49  
50 62. National Tuberculosis Control Program. Manual for health personnel. Yaounde; 2012.  
51  
52  
53 63. Royston P, Moons KGM, Altman DG, Vergouwe Y. Prognosis and prognostic research:  
54  
55  
56  
57  
58  
59  
60

- 1  
2  
3 Developing a prognostic model. *BMJ*. 2009;338(7707):1373–7.  
4  
5  
6 64. Janols H, Abate E, Idh J, Senbeto M, Britton S, Alemu S, et al. Early treatment response  
7  
8 evaluated by a clinical scoring system correlates with the prognosis of pulmonary  
9  
10 tuberculosis patients in Ethiopia: A prospective follow-up study. *Scand J Infect Dis*.  
11  
12 2012;44(11):828–34.  
13  
14  
15 65. Rudolf F, Lemvik G, Abate E, Verkuilen J, Schön T, Gomes VF, et al. TBscore II:  
16  
17 Refining and validating a simple clinical score for treatment monitoring of patients with  
18  
19 pulmonary tuberculosis. *Scand J Infect Dis*. 2013 Nov;45(11):825–36.  
20  
21  
22 66. Wejse C, Patsche CB, Kühle A, Bamba FJV V, Mendes MS, Lemvik G, et al. Impact of  
23  
24 HIV-1, HIV-2, and HIV-1+2 dual infection on the outcome of tuberculosis. *Int J Infect*  
25  
26 *Dis*. 2015 Mar;32:128–34.  
27  
28  
29 67. Definitions and reporting framework for tuberculosis - 2013 revision. In Geneva: World  
30  
31 Health Organization; 2013.  
32  
33  
34 68. Aljohaney AA. Mortality of patients hospitalized for active tuberculosis in King  
35  
36 Abdulaziz University Hospital, Jeddah, Saudi Arabia. *Saudi Med J*. 2018;39(3):267–72.  
37  
38  
39 69. Bastos HN, Osório NS, Castro AG, Ramos A, Carvalho T, Meira L, et al. A prediction  
40  
41 rule to stratify mortality risk of patients with pulmonary tuberculosis. *PLoS One*.  
42  
43 2016;11(9):1–14.  
44  
45  
46 70. Gupta-Wright A, Corbett EL, Wilson D, Van Oosterhout JJ, Dheda K, Huerga H, et al.  
47  
48 Risk score for predicting mortality including urine lipoarabinomannan detection in  
49  
50 hospital inpatients with HIV-associated tuberculosis in sub-Saharan Africa: Derivation  
51  
52 and external validation cohort study. *PLoS Med* [Internet]. 2019;16(4):1–20. Available  
53  
54 from: <http://dx.doi.org/10.1371/journal.pmed.1002776>  
55  
56  
57  
58  
59  
60



- 1  
2  
3 71. Horita N, Miyazawa N, Yoshiyama T, Sato T, Yamamoto M, Tomaru K, et al.  
4  
5 Development and validation of a tuberculosis prognostic score for smear-positive in-  
6  
7 patients in Japan. *Int J Tuberc Lung Dis*. 2013;17(1):54–60.  
8  
9
- 10 72. Podlekareva DN, Grint D, Post FA, Mcroft A, Panteleev AM, Miller RF, et al. Health  
11  
12 care index score and risk of death following tuberculosis diagnosis in HIV-positive  
13  
14 patients. *Int J Tuberc Lung Dis* [Internet]. 2013 Feb 1;17(2):198–206. Available from:  
15  
16 [http://www.embase.com/search/results?subaction=viewrecord&from=export&id=L36810](http://www.embase.com/search/results?subaction=viewrecord&from=export&id=L368106792%5Cnhttp://docstore.ingenta.com/cgi-bin/ds_deliver/1/u/d/ISIS/72353575.1/iatld/ijtld/2013/00000127/00000002/art00122/1F21E2D7FD6A26A51357873269D96871D3E6FFE5E3.pdf?link=ht)  
17  
18 [6792%5Cnhttp://docstore.ingenta.com/cgi-](http://www.embase.com/search/results?subaction=viewrecord&from=export&id=L368106792%5Cnhttp://docstore.ingenta.com/cgi-bin/ds_deliver/1/u/d/ISIS/72353575.1/iatld/ijtld/2013/00000127/00000002/art00122/1F21E2D7FD6A26A51357873269D96871D3E6FFE5E3.pdf?link=ht)  
19  
20 [bin/ds\\_deliver/1/u/d/ISIS/72353575.1/iatld/ijtld/2013/00000127/00000002/art00122/1F2](http://www.embase.com/search/results?subaction=viewrecord&from=export&id=L368106792%5Cnhttp://docstore.ingenta.com/cgi-bin/ds_deliver/1/u/d/ISIS/72353575.1/iatld/ijtld/2013/00000127/00000002/art00122/1F21E2D7FD6A26A51357873269D96871D3E6FFE5E3.pdf?link=ht)  
21  
22 [1E2D7FD6A26A51357873269D96871D3E6FFE5E3.pdf?link=ht](http://www.embase.com/search/results?subaction=viewrecord&from=export&id=L368106792%5Cnhttp://docstore.ingenta.com/cgi-bin/ds_deliver/1/u/d/ISIS/72353575.1/iatld/ijtld/2013/00000127/00000002/art00122/1F21E2D7FD6A26A51357873269D96871D3E6FFE5E3.pdf?link=ht)  
23  
24  
25
- 26 73. Wang Q, Han W, Niu J, Sun B, Dong W, Li G. Prognostic value of serum macrophage  
27  
28 migration inhibitory factor levels in pulmonary tuberculosis. *Respir Res* [Internet].  
29  
30 2019;20(1):50. Available from: <http://respiratory-research.com/home/>  
31  
32
- 33 74. Wejse C, Gustafson P, Nielsen J, Gomes VF, Aaby P, Andersen PL, et al. TBscore: Signs  
34  
35 and symptoms from tuberculosis patients in a low-resource setting have predictive value  
36  
37 and may be used to assess clinical course. *Scand J Infect Dis*. 2008;40(2):111–20.  
38  
39
- 40 75. Mburu JW, Kingwara L, Ester M, Andrew N. Use of classification and regression tree  
41  
42 (CART), to identify hemoglobin A1C (HbA1C) cut-off thresholds predictive of poor  
43  
44 tuberculosis treatment outcomes and associated risk factors. *J Clin Tuberc Other*  
45  
46 *Mycobact Dis*. 2018;11(January):10–6.  
47  
48
- 49 76. Thompson EG, Du Y, Malherbe ST, Shankar S, Braun J, Valvo J, et al. Host blood RNA  
50  
51 signatures predict the outcome of tuberculosis treatment. *Tuberculosis*. 2017;107:48–58.  
52  
53
- 54 77. Chee CBE, Boudville IC, Chan SP, Zee YK, Wang YT. Patient and disease  
55  
56  
57  
58  
59  
60

- 1  
2  
3 characteristics, and outcome of treatment defaulters from the Singapore TB control unit -  
4  
5 A one-year retrospective survey. *Int J Tuberc Lung Dis.* 2000;4(6):496–503.  
6  
7  
8 78. Rodrigo T, Caylà JA, Casals M, García-García JM, Caminero JA, Ruiz-Manzano J, et al.  
9  
10 A predictive scoring instrument for tuberculosis lost to follow-up outcome. *Respir Res.*  
11  
12 2012;13:1–9.  
13  
14  
15 79. Kalhori SRN, Zeng X-J. Fuzzy Logic Approach to Predict the Outcome of Tuberculosis  
16  
17 Treatment Course Destination. In: *Lecture Notes in Engineering and Computer Science*  
18  
19 [Internet]. NA; 2009. p. 774–8. Available from: NA  
20  
21  
22  
23  
24  
25  
26  
27  
28  
29  
30  
31  
32  
33  
34  
35  
36  
37  
38  
39  
40  
41  
42  
43  
44  
45  
46  
47  
48  
49  
50  
51  
52  
53  
54  
55  
56  
57  
58  
59  
60

**Table 1.** World Health Organization definition of treatment outcomes for TB patients(67)

| Outcome                      | Definition                                                                                                                                                                                                                                                          |
|------------------------------|---------------------------------------------------------------------------------------------------------------------------------------------------------------------------------------------------------------------------------------------------------------------|
| Treatment completion         | Completion of treatment without evidence of failure, but without documentation of a negative sputum smear or culture in the last month of treatment and/or on at least one previous occasion, either because tests were not done or because results are unavailable |
| Cure                         | Bacteriologic confirmation of a negative smear or culture at the end of TB treatment and on at least one previous occasion                                                                                                                                          |
| Treatment success            | Composite of cured and treatment completed                                                                                                                                                                                                                          |
| Treatment failure            | Sputum smear or culture is positive at month 5 or later during treatment                                                                                                                                                                                            |
| Death                        | TB patient who dies for any reason before starting or during the course of treatment                                                                                                                                                                                |
| Loss to follow-up            | TB patient who did not start treatment or whose treatment was interrupted for 2 consecutive months or more                                                                                                                                                          |
| Not evaluated (transfer out) | TB patient for whom no treatment outcome was assigned, which includes cases who “transferred out” to another treatment unit as well as cases for whom the treatment outcome is unknown to the reporting unit                                                        |

1  
2  
3 **Figure 1.** PRISMA (preferred reporting items for systematic reviews and meta-analyses) flow  
4 chart of inclusion process  
5

6  
7 **[See Figure 1]**  
8  
9  
10  
11  
12  
13  
14  
15  
16  
17  
18  
19  
20  
21  
22  
23  
24  
25  
26  
27  
28  
29  
30  
31  
32  
33  
34  
35  
36  
37  
38  
39  
40  
41  
42  
43  
44  
45  
46  
47  
48  
49  
50  
51  
52  
53  
54  
55  
56  
57  
58  
59  
60

For peer review only

Table 2. Study characteristics

| First author, year              | Population                               | Study years          | Study design         | Location                          | Validation              | No. with outcome / sample size (%)                      | Predictors in final model                                                                                                                                                                                                                                              | Performance measures                                                                                                          | Model presentation | Risk of bias (population, predictor, outcome, analysis) |
|---------------------------------|------------------------------------------|----------------------|----------------------|-----------------------------------|-------------------------|---------------------------------------------------------|------------------------------------------------------------------------------------------------------------------------------------------------------------------------------------------------------------------------------------------------------------------------|-------------------------------------------------------------------------------------------------------------------------------|--------------------|---------------------------------------------------------|
| Death                           |                                          |                      |                      |                                   |                         |                                                         |                                                                                                                                                                                                                                                                        |                                                                                                                               |                    |                                                         |
| Abdelbary(9) / 2017             | TB cases                                 | 2006 - 2013          | Retrospective cohort | Mexico                            | Internal (split-sample) | Development: 261/4216 (6%)<br>Validation: 260/4215 (6%) | Age (<41, 41-65, ≥65), sex, MDR, HIV, malnutrition, alcoholism, diabetes, pulmonary TB                                                                                                                                                                                 | c-statistic = 0.70<br>Sensitivity = 60%<br>Specificity = 71%                                                                  | Risk score         | Low, High, Low, High                                    |
| Abdelbary(9) / 2017 (TB-DM)     | TB-DM cases                              | 2006 - 2013          | Retrospective cohort | Mexico                            | None                    | 88/2121 (4%)                                            | Sex, malnutrition, BCG vaccinated, AFB smear (positive vs. negative)                                                                                                                                                                                                   | c-statistic = 0.68                                                                                                            | Risk score         | Unclear, High, Low, High                                |
| Aljohaney(68) / 2018            | Hospitalized TB patients                 | Dec 2011 – Dec 2016  | Retrospective cohort | Saudi Arabia                      | None                    | 41/291 (14%)                                            | Clinical model: Age, congestive heart failure<br>Clinical + lab model: * Age > 65, congestive heart failure, bilateral disease on chest xray                                                                                                                           | Clinical model: Accuracy = 86%<br>Clinical & lab model: * Accuracy = 90%                                                      | Odds ratios        | Unclear, Unclear, Unclear, High                         |
| Bastos(69) / 2016               | Inpatient and outpatient TB cases on DOT | 2007 - 2013          | Retrospective cohort | Portugal                          | External (setting)      | Development: 121/681 (18%)<br>Validation: 24/103 (23%)  | Hypoxemic respiratory failure, age (≥50 vs. <50), bilateral involvement, comorbidities (at least one of HIV, diabetes, liver at least one of: HIV, diabetes, liver failure/cirrhosis, congestive heart failure, chronic respiratory disease), hemoglobin (<12 vs. ≥12) | AUROC = 0.84 (95% CI: 0.76-0.93)<br>Sensitivity = 41.8%<br>Specificity = 92.1%                                                | Risk score         | Low, Unclear, Low, High                                 |
| Gupta-Wright(70) / 2019         | Hospitalized TB-HIV patients             | Oct 2015 – Sept 2017 | Retrospective cohort | Malawi and South Africa           | External (setting)      | Development: 94/315 (30%)<br>Validation: 147/644 (23%)  | Sex, age 55+, currently taking ART, ability to walk unaided, severe anemia, positive TB-LAM                                                                                                                                                                            | c-statistic = 0.68 (95% CI: 0.61-0.74)<br>HL test: p=0.13<br>Calibration plot                                                 | Risk score         | Low, Low, Low, High                                     |
| Horita(71) / 2013               | Hospitalized TB patients                 | Jan 2008 – Jul 2011  | Retrospective cohort | Japan                             | External (setting)      | Development: 36/179 (20%)<br>Validation: 48/244 (20%)   | Age, oxygen requirement, albumin, activities of daily living                                                                                                                                                                                                           | AUROC = 0.893<br>Sensitivity = 0.92<br>Specificity = 0.73                                                                     | Risk score         | Low, Low, Low, High                                     |
| Koegelenberg(39) / 2015         | Hospitalized TB patients                 | Jan 2012 – May 2013  | Retrospective cohort | South Africa                      | None                    | 38/83 (46%)                                             | Septic shock, HIV with CD4 < 200, creatinine > 140 (male) or >120 (female), P:F O2 ratio < 200, chest radiograph showing miliary pattern/parenchymal infiltrates, absence of TB treatment at admission                                                                 | Mean score in survivors: 2.27 (SD=1.47)<br>Mean score in non-survivors: 3.58 (SD=1.08)                                        | Risk score         | Low, Low, Low, High                                     |
| Nguyen(52) (general pop) / 2018 | TB cases                                 | Jan 2010 – Dec 2016  | Retrospective cohort | Texas                             | Internal (split-sample) | Development: 253/3378 (7%)<br>Validation: 270/3377 (8%) | Age group (15-44, 44-64, >64), US born, homeless, resident of long term care facility, chronic kidney failure, meningial TB, miliary TB, HIV positive, HIV unknown                                                                                                     | AUROC = 0.80 (95% CI: 0.77-0.82)<br>HL test: X <sup>2</sup> =6.3, p=0.613                                                     | Risk score         | Low, Unclear, Unclear, High                             |
| Nguyen(36) (TB-DM) / 2019       | TB-DM patients                           | Jan 2010 – Dec 2016  | Retrospective cohort | Texas                             | Internal (bootstrap)    | 112/1227 (9%)                                           | Age ≥65, US-born, homeless, IDU, chronic kidney failure, TB meningitis, Miliary TB, AFB positive smear, HIV positive                                                                                                                                                   | AUROC = 0.82 (95% CI: 0.78-0.87)<br>HL test: X <sup>2</sup> =4.54, p=0.81<br>Brier score=0.07                                 | Risk score         | Unclear, Unclear, Unclear, High                         |
| Nguyen(51) (TB-HIV) / 2018      | TB-HIV patients                          | Jan 2010 – Dec 2016  | Retrospective cohort | Texas                             | Internal (bootstrap)    | 57/450 (13%)                                            | Age ≥ 45, resident of LTCF, meningial TB, abnormal CXR, diagnosis confirmed by positive culture of NAA, culture not converted or unknown                                                                                                                               | AUROC = 0.79 (95% CI 0.70-0.87)<br>HL test: X <sup>2</sup> =4.25, p=0.51<br>Brier score: 0.09                                 | Risk score         | Low, High, Unclear, High                                |
| Pefura-Yone(53) / 2017          | TB patients                              | Jan 2012 – Dec 2013  | Retrospective cohort | Cameroon                          | Internal (bootstrap)    | 213/2250 (9%)                                           | Age, adjusted BMI, clinical form (PTB+, PTB-, EPTB), HIV                                                                                                                                                                                                               | C-statistic: 0.808<br>HL test: X <sup>2</sup> =6.44, p=0.60<br>Sensitivity = 80.7%<br>Specificity = 68.2%<br>Calibration plot | Model coefficients | Low, Low, Low, High                                     |
| Podlekareva(72) / 2013          | TB/HIV patients                          | Jan 2004 – Dec 2006  | Retrospective cohort | 52 cities in Europe and Argentina | None                    | 995†                                                    | DST performed, treatment with RHZ, and cART at/near TB diagnosis                                                                                                                                                                                                       | Crude RH = 0.62 (95% CI: 0.64-0.84)                                                                                           | Risk score         | Low, Unclear, Low, High                                 |
| Valade(41) / 2012               | Hospitalized TB patients                 | Mar 2000 – Jul 2009  | Retrospective cohort | France                            | Internal (bootstrap)    | 20/53 (38%)                                             | Miliary TB, catecholamine infusion, mechanical ventilation on admission                                                                                                                                                                                                | AUROC = 0.92 (95% CI: 0.85-0.98)<br>Brier score = 0.13                                                                        | Risk score         | Unclear, Low,                                           |

|    |                              |                                                                    |                     |                         |               |                                                    |                                                              |                                                                                                                                                                                                                                                                                                                                                                                                           |                                                                                                                                                       |                                           |                                          |
|----|------------------------------|--------------------------------------------------------------------|---------------------|-------------------------|---------------|----------------------------------------------------|--------------------------------------------------------------|-----------------------------------------------------------------------------------------------------------------------------------------------------------------------------------------------------------------------------------------------------------------------------------------------------------------------------------------------------------------------------------------------------------|-------------------------------------------------------------------------------------------------------------------------------------------------------|-------------------------------------------|------------------------------------------|
| 1  |                              |                                                                    |                     |                         |               |                                                    |                                                              | Optimism = 0.03<br>Accuracy = 85%<br>Sensitivity - 75%<br>Specificity = 91%                                                                                                                                                                                                                                                                                                                               |                                                                                                                                                       | Low,<br>High                              |                                          |
| 2  |                              |                                                                    |                     |                         |               |                                                    |                                                              |                                                                                                                                                                                                                                                                                                                                                                                                           |                                                                                                                                                       |                                           |                                          |
| 3  | Wang(73) / 2019              | HIV-negative, culture-confirmed, pulmonary TB cases                | Jan 2014 – Dec 2016 | Prospective cohort      | China         | External (setting)                                 | Development: 36/287 (13%)<br>Validation: 15/104 (14%)        | Age, cavitory lesion, pleural effusion, drug resistance, disseminated, albumin, c-reactive protein, white blood cell count, IL-6, MIF                                                                                                                                                                                                                                                                     | AUROC = 0.85 ± 0.028                                                                                                                                  | Odds ratios                               | Low,<br>Low,<br>Low,<br>High             |
| 4  |                              |                                                                    |                     |                         |               |                                                    |                                                              |                                                                                                                                                                                                                                                                                                                                                                                                           |                                                                                                                                                       |                                           |                                          |
| 5  | Wejse(74) / 2008             | Pulmonary TB patients on DOT                                       | 1996 - 2001         | Retrospective cohort    | Guinea Bissau | None                                               | 100/698 (14%)                                                | Cough, hemoptysis, dyspnea, chest pain, night sweating, anemia conjunctivae, tachycardia, positive funding at lung auscultation, temperature >37, BMI <18, BMI<16, MUAC<220, MUAC<200                                                                                                                                                                                                                     | AUROC = 0.65 (95% CI: 0.6-0.7)<br>Sensitivity = 0.45<br>Specificity = 0.75                                                                            | Risk score                                | Low,<br>High,<br>Low,<br>High            |
| 6  |                              |                                                                    |                     |                         |               |                                                    |                                                              |                                                                                                                                                                                                                                                                                                                                                                                                           |                                                                                                                                                       |                                           |                                          |
| 7  | Zhang(44) / 2019             | TB/HIV patients at end stage of AIDS                               | Aug 2009 – Jan 2018 | Retrospective cohort    | China         | Internal (split-sample)                            | Development: 157/807 (19%)<br>Validation: 40/200 (20%)       | Anemia, TB meningitis, severe pneumonia, hypoalbuminemia, unexplained infection or space-occupying lesions, malignancy                                                                                                                                                                                                                                                                                    | AUROC = 0.867 (95% CI: 0.832-0.902)<br>Sensitivity = 79.6%<br>Specificity = 82.9%                                                                     | Risk score                                | Low,<br>Low,<br>Low,<br>High             |
| 8  |                              |                                                                    |                     |                         |               |                                                    |                                                              |                                                                                                                                                                                                                                                                                                                                                                                                           |                                                                                                                                                       |                                           |                                          |
| 9  | 11 Treatment failure         |                                                                    |                     |                         |               |                                                    |                                                              |                                                                                                                                                                                                                                                                                                                                                                                                           |                                                                                                                                                       |                                           |                                          |
| 10 |                              |                                                                    |                     |                         |               |                                                    |                                                              |                                                                                                                                                                                                                                                                                                                                                                                                           |                                                                                                                                                       |                                           |                                          |
| 11 | Abdelbary(9) / 2017          | TB cases                                                           | 2006 - 2013         | Retrospective cohort    | Mexico        | Internal (split-sample)                            | Development: 2109†<br>Validation: 6322†                      | Education (no or low vs. higher than primary school), MDR, AFB smear (>+2, +1, negative)                                                                                                                                                                                                                                                                                                                  | c-statistic = 0.65<br>Sensitivity = 52%<br>Specificity = 66%                                                                                          | Risk score                                | Low,<br>High,<br>Low,<br>High            |
| 12 |                              |                                                                    |                     |                         |               |                                                    |                                                              |                                                                                                                                                                                                                                                                                                                                                                                                           |                                                                                                                                                       |                                           |                                          |
| 13 | Kalhor(48) (logistic) / 2010 | TB cases at DOTS registration                                      | 2005                | Retrospective cohort    | Iran          | Internal (split-sample)                            | Development: 828/4836 (17%)<br>Validation: 2418†             | Gender, age, weight nationality, prison, case type                                                                                                                                                                                                                                                                                                                                                        | AUROC = 0.70<br>Accuracy = 81.64%<br>HL test: X <sup>2</sup> =11.935, df=8, p=0.154                                                                   | Model coefficients                        | Unclear,<br>Unclear,<br>Unclear,<br>High |
| 14 |                              |                                                                    |                     |                         |               |                                                    |                                                              |                                                                                                                                                                                                                                                                                                                                                                                                           |                                                                                                                                                       |                                           |                                          |
| 15 | Keane(29) / 1997             | Smear-positive TB patients on standard first-line regimen with DOT | 1990 - 1995         | Non-nested case control | Vietnam       | None                                               | 130/803 (16%)                                                | 3 month model: Extensive lesions, mediastinal shift, average smear score 3rd month, weight, progressive x-ray, any previous treatment<br>Baseline model: Mediastinal shift, average smear score, extensive lesions, any previous treatment, cavities, weight                                                                                                                                              | 3 month:<br>Sensitivity = 80%<br>Specificity = 80%<br>Baseline:<br>Sensitivity = 70%<br>Specificity = 80%                                             | Model coefficients                        | High,<br>Unclear,<br>Unclear,<br>High    |
| 16 |                              |                                                                    |                     |                         |               |                                                    |                                                              |                                                                                                                                                                                                                                                                                                                                                                                                           |                                                                                                                                                       |                                           |                                          |
| 17 | Luiies(32) / 2017            | Smear-positive pulmonary TB cases on DOT                           | May 1999 – Jul 2002 | Nested case-control     | South Africa  | Internal (cross-validation)                        | 10/31 (32%)                                                  | 3,5,-Dihydroxybenzoic acid, (3-(4-Hydroxy-3-methoxyphenyl) propionic acid                                                                                                                                                                                                                                                                                                                                 | AUROC = 0.89 (95% CI: 0.7-1.00)                                                                                                                       | Model coefficients                        | High,<br>Unclear,<br>Unclear,<br>High    |
| 18 |                              |                                                                    |                     |                         |               |                                                    |                                                              |                                                                                                                                                                                                                                                                                                                                                                                                           |                                                                                                                                                       |                                           |                                          |
| 19 | Mburu(75) / 2018             | Smear-positive TB patients                                         | Feb 2014 – Aug 2015 | Prospective cohort      | Kenya         | Internal (cross-validation)                        | 13/321 (4%)                                                  | HbA1c, regimen (retreatment), age, weight, random blood glucose, BMI, BUN, HIV positive result, ever smoker, creatinine                                                                                                                                                                                                                                                                                   | AUROC = 0.56 ± 0.07                                                                                                                                   | Relative score                            | Low,<br>Low,<br>Low,<br>High             |
| 20 |                              |                                                                    |                     |                         |               |                                                    |                                                              |                                                                                                                                                                                                                                                                                                                                                                                                           |                                                                                                                                                       |                                           |                                          |
| 21 | 27 Default                   |                                                                    |                     |                         |               |                                                    |                                                              |                                                                                                                                                                                                                                                                                                                                                                                                           |                                                                                                                                                       |                                           |                                          |
| 22 |                              |                                                                    |                     |                         |               |                                                    |                                                              |                                                                                                                                                                                                                                                                                                                                                                                                           |                                                                                                                                                       |                                           |                                          |
| 23 | Thompson(76) / 2017          | HIV uninfected adults with newly diagnosed pulmonary TB            | Apr 2010 – Apr 2013 | Retrospective cohort    | South Africa  | Internal (cross-validation) and external (setting) | 6/99 (6%)                                                    | 18 splice junctions and 13 genes                                                                                                                                                                                                                                                                                                                                                                          | AUROC (internal) = 0.87<br>AUROC (external) = 0.63                                                                                                    | Heatmap of differentially expressed genes | Low,<br>Low,<br>Low,<br>High             |
| 24 |                              |                                                                    |                     |                         |               |                                                    |                                                              |                                                                                                                                                                                                                                                                                                                                                                                                           |                                                                                                                                                       |                                           |                                          |
| 25 | Abdelbary(9) / 2017 (TB-DM)  | TB cases                                                           | 2006 - 2013         | Retrospective cohort    | Mexico        | None                                               | 93/2121 (4%)                                                 | Age (<40 vs. ≥40), sex, HIV                                                                                                                                                                                                                                                                                                                                                                               | c-statistic= 0.62                                                                                                                                     | Risk score                                | Unclear,<br>High,<br>Unclear,<br>High    |
| 26 |                              |                                                                    |                     |                         |               |                                                    |                                                              |                                                                                                                                                                                                                                                                                                                                                                                                           |                                                                                                                                                       |                                           |                                          |
| 27 | Belilovsky(34) / 2010        | Hospitalized TB patients                                           | 1993 - 2002         | Retrospective cohort    | Russia        | External (geographical)                            | Development: 1326/3904 (34%)<br>Validation: 4662/12803 (36%) | Sex, unemployment, retreatment case, alcohol abuse (yes, no, data), severe TB form, residence (urban vs. rural), age (25-50 vs. other), pulmonary TB (vs extrapulmonary), prison history                                                                                                                                                                                                                  | Belgrood: AUROC = 0.75<br>Orel: AUROC = 0.75<br>Pskov: AUROC = 0.78<br>Yaroslavi: AUROC = 0.75<br>Calibration table                                   | Model coefficients                        | Unclear,<br>High,<br>High,<br>High       |
| 28 |                              |                                                                    |                     |                         |               |                                                    |                                                              |                                                                                                                                                                                                                                                                                                                                                                                                           |                                                                                                                                                       |                                           |                                          |
| 29 | Chang(30) / 2004             | All tuberculosis patients                                          | Jan 1999 – Mar 1999 | Nested case-control     | China         | None                                               | 102/408 (25%)                                                | Baseline:* Ever smoker (current, former, never), retreatment (history of default, no history of default, not)<br>Longitudinal: Smoking status (current, former, never), retreatment (with history of default, without history of default, never), unsatisfactory adherence in first two months (good, poor, fair, unknown), subsequent hospitalization, treatment side effects in last month of treatment | Baseline:*<br>AUROC = 0.70 (95% CI: 0.63-0.76)<br>HL test: X <sup>2</sup> = 1.448, df=5, p=0.919<br>Longitudinal:<br>AUROC = 0.85 (95% CI: 0.80-0.90) | Odds ratios                               | High,<br>High,<br>Low,<br>High           |
| 30 |                              |                                                                    |                     |                         |               |                                                    |                                                              |                                                                                                                                                                                                                                                                                                                                                                                                           |                                                                                                                                                       |                                           |                                          |

|    |                                 |                                                                      |                                   |                         |                                                |                         |                                                        |                                                                                                                                                                                                                                                        |                                                                                                                         |                    |                                 |
|----|---------------------------------|----------------------------------------------------------------------|-----------------------------------|-------------------------|------------------------------------------------|-------------------------|--------------------------------------------------------|--------------------------------------------------------------------------------------------------------------------------------------------------------------------------------------------------------------------------------------------------------|-------------------------------------------------------------------------------------------------------------------------|--------------------|---------------------------------|
| 1  |                                 |                                                                      |                                   |                         |                                                |                         |                                                        | HL test: $X^2 = 5.887$ , $df=6$ , $p=0.436$                                                                                                                                                                                                            |                                                                                                                         |                    |                                 |
| 2  | Chee(77) / 2000                 | TB cases                                                             | 1996                              | Nested case-control     | Singapore                                      | None                    | 38/71 (54%)                                            | Chinese race, extent of family support, treatment duration                                                                                                                                                                                             | Accuracy = 74.6%                                                                                                        | Model coefficients | High, Unclear, High, High       |
| 4  |                                 |                                                                      |                                   |                         |                                                |                         |                                                        |                                                                                                                                                                                                                                                        | AUROC = 0.85 (95% CI: 0.80-0.90)<br>Sensitivity = 82.4%<br>Specificity = 87.6%<br>HL test: $X^2=0.77$ , $p$ -value=1.00 | Survey tool        | High, High, High, High          |
| 5  | Cherkaoui(28) / 2014            | TB patients with definite or probable pulmonary or extrapulmonary TB | Jun 2010 – Oct 2011               | Non-nested case-control | Morocco                                        | None                    | 91/277 (33%)                                           | Age <50, work interfering with ability to take TB treatment, retreatment regimen, daily DOT, moderate or severe side effects, told friends about TB, current smoker, never smoker, symptom resolution in <2 months, knowledge of TB treatment duration | AUROC = 0.67 (95% CI: 0.65-0.70)<br>Sensitivity = 65.05%<br>Specificity = 67.36%                                        | Risk score         | Low, Low, Low, High             |
| 9  | Rodrigo(78) / 2012              | New TB cases                                                         | Jan 2006 – Dec 2009               | Prospective cohort      | Spain                                          | Internal (split-sample) | Development: 92/1490 (6%)<br>Validation: 103/1589 (6%) | Immigrant, living alone, living in an institution, previous TB treatment, linguistic barriers (poor understanding), IV drug use, unknown IV drug use                                                                                                   |                                                                                                                         |                    |                                 |
| 11 | Unfavorable outcome             |                                                                      |                                   |                         |                                                |                         |                                                        |                                                                                                                                                                                                                                                        |                                                                                                                         |                    |                                 |
| 13 | Kalhor(49) (predicting) / 2009† | TB patients at DOT registration                                      | 2005                              | Retrospective cohort    | Iran                                           | Internal (split-sample) | Development: 6920†<br>Validation: 2966†                | Age, gender, nationality, prison, area, weight                                                                                                                                                                                                         | Classification rate = 89.8%<br>R2 = 0.45                                                                                | Model coefficients | Unclear, Unclear, Unclear, High |
| 15 |                                 |                                                                      |                                   |                         |                                                |                         |                                                        |                                                                                                                                                                                                                                                        | FS:*                                                                                                                    |                    |                                 |
| 16 |                                 |                                                                      |                                   |                         |                                                |                         |                                                        |                                                                                                                                                                                                                                                        | AUROC = 0.74 (95% CI: 0.66-0.82)<br>Sensitivity = 0.36<br>Specificity = 0.89<br>Misclassification = 0.24                |                    |                                 |
| 17 |                                 |                                                                      |                                   |                         |                                                |                         |                                                        |                                                                                                                                                                                                                                                        | BE:                                                                                                                     |                    |                                 |
| 18 |                                 |                                                                      |                                   |                         |                                                |                         |                                                        |                                                                                                                                                                                                                                                        | AUROC = 0.73 (95% CI: 0.65-0.81)<br>Sensitivity = 0.3<br>Specificity = 0.88<br>Misclassification = 0.27                 |                    |                                 |
| 19 |                                 |                                                                      |                                   |                         |                                                |                         |                                                        |                                                                                                                                                                                                                                                        | SS:                                                                                                                     |                    |                                 |
| 20 |                                 |                                                                      |                                   |                         |                                                |                         |                                                        |                                                                                                                                                                                                                                                        | AUROC = 0.73 (95% CI: 0.65-0.81)<br>Sensitivity = 0.30<br>Specificity = 0.88<br>Misclassification = 0.27                |                    |                                 |
| 21 |                                 |                                                                      |                                   |                         |                                                |                         |                                                        |                                                                                                                                                                                                                                                        | SS:                                                                                                                     |                    |                                 |
| 22 |                                 |                                                                      |                                   |                         |                                                |                         |                                                        |                                                                                                                                                                                                                                                        | AUROC = 0.73 (95% CI: 0.65-0.81)<br>Sensitivity = 0.30<br>Specificity = 0.88<br>Misclassification = 0.27                |                    |                                 |
| 23 |                                 |                                                                      |                                   |                         |                                                |                         |                                                        |                                                                                                                                                                                                                                                        | Lasso:                                                                                                                  |                    |                                 |
| 24 |                                 |                                                                      |                                   |                         |                                                |                         |                                                        |                                                                                                                                                                                                                                                        | AUROC = 0.72 (95% CI: 0.64-0.80)<br>Sensitivity = 0.21<br>Specificity = 0.96<br>Misclassification = 0.23                | List               | Unclear, Unclear, High          |
| 25 |                                 |                                                                      |                                   |                         |                                                |                         |                                                        |                                                                                                                                                                                                                                                        | RF:                                                                                                                     |                    |                                 |
| 26 |                                 |                                                                      |                                   |                         |                                                |                         |                                                        |                                                                                                                                                                                                                                                        | AUROC = 0.73 (95% CI: 0.65-0.81)<br>Sensitivity = 0.30<br>Specificity = 0.88<br>Misclassification = 0.27                |                    |                                 |
| 27 |                                 |                                                                      |                                   |                         |                                                |                         |                                                        |                                                                                                                                                                                                                                                        | SVM linear:                                                                                                             |                    |                                 |
| 28 |                                 |                                                                      |                                   |                         |                                                |                         |                                                        |                                                                                                                                                                                                                                                        | AUROC = 0.69 (95% CI: 0.60-0.77)<br>Sensitivity = 0.21<br>Specificity = 0.94<br>Misclassification = 0.24                |                    |                                 |
| 29 | Sauer(56) / 2018†               | TB cases                                                             | Data available through March 2018 | Retrospective cohort    | Azerbaijan, Belarus, Georgia, Moldova, Romania | Internal (split-sample) | Development: 103/411 (25%)<br>Validation: 44/176 (25%) | Country, employment, extrapulmonary, cavity size, decrease in lung capacity, smear microscopy, drug sensitivity, chest imaging                                                                                                                         | AUROC = 0.69 (95% CI: 0.60-0.77)<br>Sensitivity = 0.21<br>Specificity = 0.94<br>Misclassification = 0.24                |                    |                                 |
| 30 |                                 |                                                                      |                                   |                         |                                                |                         |                                                        |                                                                                                                                                                                                                                                        | SVM polynomial:                                                                                                         |                    |                                 |
| 31 |                                 |                                                                      |                                   |                         |                                                |                         |                                                        |                                                                                                                                                                                                                                                        | AUROC = 0.69 (95% CI: 0.60-0.77)<br>Sensitivity = 0<br>Specificity = 1<br>Misclassification = 0.25                      |                    |                                 |
| 32 |                                 |                                                                      |                                   |                         |                                                |                         |                                                        |                                                                                                                                                                                                                                                        |                                                                                                                         |                    |                                 |
| 33 |                                 |                                                                      |                                   |                         |                                                |                         |                                                        |                                                                                                                                                                                                                                                        |                                                                                                                         |                    |                                 |
| 34 |                                 |                                                                      |                                   |                         |                                                |                         |                                                        |                                                                                                                                                                                                                                                        |                                                                                                                         |                    |                                 |
| 35 |                                 |                                                                      |                                   |                         |                                                |                         |                                                        |                                                                                                                                                                                                                                                        |                                                                                                                         |                    |                                 |
| 36 |                                 |                                                                      |                                   |                         |                                                |                         |                                                        |                                                                                                                                                                                                                                                        |                                                                                                                         |                    |                                 |
| 37 |                                 |                                                                      |                                   |                         |                                                |                         |                                                        |                                                                                                                                                                                                                                                        |                                                                                                                         |                    |                                 |
| 38 |                                 |                                                                      |                                   |                         |                                                |                         |                                                        |                                                                                                                                                                                                                                                        |                                                                                                                         |                    |                                 |
| 39 |                                 |                                                                      |                                   |                         |                                                |                         |                                                        |                                                                                                                                                                                                                                                        |                                                                                                                         |                    |                                 |
| 40 |                                 |                                                                      |                                   |                         |                                                |                         |                                                        |                                                                                                                                                                                                                                                        |                                                                                                                         |                    |                                 |
| 41 |                                 |                                                                      |                                   |                         |                                                |                         |                                                        |                                                                                                                                                                                                                                                        |                                                                                                                         |                    |                                 |
| 42 |                                 |                                                                      |                                   |                         |                                                |                         |                                                        |                                                                                                                                                                                                                                                        |                                                                                                                         |                    |                                 |
| 43 |                                 |                                                                      |                                   |                         |                                                |                         |                                                        |                                                                                                                                                                                                                                                        |                                                                                                                         |                    |                                 |

|    |                                        |                                                     |                     |                      |          |                             |                                                                               |                                                                                                                                                                                                                                                                                                                                                                                                                                                                                     |                                                                                                                                                        |                    |                              |
|----|----------------------------------------|-----------------------------------------------------|---------------------|----------------------|----------|-----------------------------|-------------------------------------------------------------------------------|-------------------------------------------------------------------------------------------------------------------------------------------------------------------------------------------------------------------------------------------------------------------------------------------------------------------------------------------------------------------------------------------------------------------------------------------------------------------------------------|--------------------------------------------------------------------------------------------------------------------------------------------------------|--------------------|------------------------------|
| 1  | Baussano(46) / 2008 <sup>§</sup>       | Pulmonary TB cases                                  | 2001 - 2005         | Retrospective cohort | Italy    | Internal (bootstrap)        | 576/1242 (46%)                                                                | Residency (residential vs. homeless), sex, geographic origin (non-EU vs. EU), case definition (other than definite vs. definite), treatment setting (inpatient and unknown vs. outpatient), age (continuous)                                                                                                                                                                                                                                                                        | AUROC= 0.75<br>Calibration slope = 0.98<br>R <sup>2</sup> = 0.24                                                                                       | Nomogram           | Low, Unclear, Low, High      |
| 3  | Costa-Veiga(47) / 2017 <sup>§</sup>    | Pulmonary TB cases                                  | 2000 - 2012         | Retrospective cohort | Portugal | External (temporal)         | <i>Development:</i> 1152/10766 (11%)<br><i>Validation:</i> 4714 <sup>†</sup>  | HIV, previous treatment, age class (25-44, 15-24, 45-64, >64), IV drug use, pathologies (other disease comorbidity)                                                                                                                                                                                                                                                                                                                                                                 | AUROC = 75.9%<br>(95% CI: 74.1-77.7)<br>Sensitivity = 71%<br>Specificity = 73%                                                                         | Nomogram           | Low, Low, Low, High          |
| 7  | Killian(33) / 2019 <sup>§</sup>        | TB patients (99DOTS program)                        | Feb 2017 – Sep 2018 | Retrospective cohort | India    | None                        | 433/4167 (10%)                                                                | <u>LEAP</u> :* Lstm rEal-time Adherence Predictor with 2 input layers, 1) LSTM with 64 hidden units and a dense layer with 48 units for the dense layer and 4 units for the penultimate layer<br><u>w-misses</u> : missed doses in last week<br><u>t-misses</u> : total missed doses in 35 days units and a dense layer with 48 units for the dense layer and 4 units for the penultimate layer<br><u>Random forest</u> : 150 trees and no max depth based on DAT from first 35 day | <u>LEAP</u> *<br>AUROC = 0.743<br><u>lw-misses</u> :<br>AUROC = 0.607<br><u>t-misses</u> :<br>AUROC = 0.630<br><u>Random forest</u> :<br>AUROC = 0.722 | None               | High, High, Unclear, High    |
| 13 | Madan(50) / 2018 <sup>§</sup>          | TB-HIV patients on DOT with first-line TB treatment | 2015                | Retrospective cohort | India    | None                        | 78/448 (17%)                                                                  | Sputum smear grade, previous TB, disease classification, HIV status, ART status, CD4 cell count, sex and age group (with interaction terms between age group and sex; sputum smear status and type of TB; HIV status at TB diagnosis and CD4 cell category).                                                                                                                                                                                                                        | AUROC = 0.783<br>HL test p-value = 0.149                                                                                                               | Model coefficients | Low, Low, Low, High          |
| 16 | Mburu(75) / 2018 <sup>§</sup>          | Smear-positive TB patients                          | Feb 2014 – Aug 2015 | Prospective cohort   | Kenya    | Internal (cross-validation) | 32/340 (9%)                                                                   | HbA1c, treatment regimen (retreatment), creatinine, BMI, BUN, weight, age, random blood glucose, HIV positive result, male gender                                                                                                                                                                                                                                                                                                                                                   | AUROC = 0.65 ± 0.06                                                                                                                                    | Relative score     | Low, Low, Low, High          |
| 19 | Other outcome                          |                                                     |                     |                      |          |                             |                                                                               |                                                                                                                                                                                                                                                                                                                                                                                                                                                                                     |                                                                                                                                                        |                    |                              |
| 20 | Kalhor(79) (fuzzy) / 2009 <sup>§</sup> | TB patients at DOTS registration                    | 2005                | Retrospective cohort | Iran     | Internal (split-sample)     | <i>Development:</i> 7254 <sup>†</sup><br><i>Validation:</i> 2418 <sup>†</sup> | Case type, treatment category, risky sex, prison, sex, recent TB infection, diabetes, low body weight, TB type, length, previous imprisonment, age, area, HIV                                                                                                                                                                                                                                                                                                                       | Mean absolute percentage error = 1.24                                                                                                                  | Learned parameters | Unclear, Unclear, High, High |
| 24 | Hussain(55) / 2019 <sup>¶</sup>        | Pulmonary and extrapulmonary TB patients (TB Reach) | 2011 - 2014         | Retrospective cohort | Unknown  | Internal (split-sample)     | <i>Development:</i> 3371 <sup>†</sup><br><i>Validation:</i> 842 <sup>†</sup>  | Random forest*, artificial neural networks, and SVM                                                                                                                                                                                                                                                                                                                                                                                                                                 | <u>Random forest</u> :*<br>Accuracy = 76.32%                                                                                                           | None               | Unclear, Unclear, High       |

Abbreviations: AUROC=Area under receiver operating characteristic; c-statistic=concordance statistic; DOTS=Directly Observed Therapy, DM=Diabetes; HL=Hosmer-Lemeshow; TB=Tuberculosis;

\*Indicates best-performing/most relevant model, which is included throughout the manuscript (see methods section for details). Performance measures are reported for highest level of validation performed (ranked from strongest to weakest: external validation, internal validation, no validation). If internal and external validation were performed, both are reported.

<sup>†</sup>Outcome number unknown

<sup>‡</sup>Outcome is composite of death and treatment failure (losses to follow-up and not evaluated (unknown) outcomes were excluded)

<sup>§</sup>Outcome is composite of death, treatment failure, loss to follow-up, and not evaluated

<sup>¶</sup>Outcome is a value from 1 to 5 (1= patient completed the treatment course in frame of DOTS, 2=cured, 3= quit treatment, 4=failed treatment and 5=death)

<sup>||</sup>Outcome is treatment completion



**Table 3.** Characteristics of patient populations in the 33 included studies with prediction models for tuberculosis treatment outcomes

| Characteristic             | Studies reporting characteristic, n (% of total) | Categories                               | N(%) or Median [IQR] |
|----------------------------|--------------------------------------------------|------------------------------------------|----------------------|
| Sample size                | 33 (11)                                          | -                                        | 803 [291, 4167]      |
| Study duration, years      | 32 (97)                                          | -                                        | 4 [2,7]              |
| Study design               | 33 (100)                                         | Prospective cohort                       | 3 (9)                |
|                            |                                                  | Retrospective cohort                     | 25 (76)              |
|                            |                                                  | Nested case-control                      | 3 (9)                |
|                            |                                                  | Non-nested case-control                  | 2 (6)                |
| Data source                | 33 (100)                                         | Medical record                           | 6 (18)               |
|                            |                                                  | National registry or surveillance system | 13 (39)              |
|                            |                                                  | Local registry or surveillance system    | 1 (3)                |
|                            |                                                  | Regional registry or surveillance system | 2 (6)                |
|                            |                                                  | Data collect form for study purposes     | 11 (33)              |
| Study region               | 32 (97)                                          | Africa                                   | 8 (25)               |
|                            |                                                  | Asia                                     | 13 (41)              |
|                            |                                                  | Europe                                   | 6 (19)               |
|                            |                                                  | North America                            | 4 (12)               |
|                            |                                                  | South America                            | 0 (0)                |
|                            |                                                  | Global                                   | 1 (3)                |
| High burden TB setting*    | 31 (94)                                          | All                                      | 143(42)              |
|                            |                                                  | Some                                     | 1 (3)                |
|                            |                                                  | None                                     | 17 (55)              |
| Missing data               | 18 (54)                                          | Complete case-analysis                   | 9 (50)               |
|                            |                                                  | Missing indicator method                 | 4 (22)               |
|                            |                                                  | Heckman's method                         | 1 (6)                |
|                            |                                                  | Simple imputation                        | 2 (12)               |
|                            |                                                  | Sensitivity analysis with imputation     | 1 (6)                |
|                            |                                                  | Other                                    | 1 (5)                |
| Number of models developed | 33 (100)                                         | 1                                        | 25 (76)              |
|                            |                                                  | 2                                        | 4 (12)               |
|                            |                                                  | 3                                        | 1 (3)                |

|                                       |        |                                    |        |
|---------------------------------------|--------|------------------------------------|--------|
|                                       |        | 4                                  | 2 (6)  |
|                                       |        | 7                                  | 1 (3)  |
| Reasons for multiple models developed | 8 (24) | Different outcomes                 | 1 (12) |
|                                       |        | Different predictors considered    | 4 (50) |
|                                       |        | Different methods                  | 2 (25) |
|                                       |        | Different outcomes                 | 1 (12) |
|                                       |        | Different populations and outcomes | 1 (12) |

\*Determined based on study location and WHO list of 30 high-burden TB countries in the 2019 Global Tuberculosis Report (1).

**Table 4.** Study population characteristics of 33 included studies

| Characteristic                 | Included? |    |         | Median [IQR] <sup>‡</sup> , n |
|--------------------------------|-----------|----|---------|-------------------------------|
|                                | Yes       | No | Unknown |                               |
| Age*                           | 18        | -  | 15      | 41 [37, 49],                  |
| HIV                            | 18        | 7  | 8       | 23% [10-100], n=17            |
| Diabetes                       | 12        | 2  | 19      | 12% [5-21], n=11              |
| MDR                            | 8         | 7  | 18      | 1% [1-3], n=8                 |
| Other drug resistance          | 12        | 1  | 20      | 6% [4-12], n=10               |
| Extrapulmonary TB <sup>†</sup> | 22        | 4  | 7       | 11% [4-17], n=16              |
| Previous TB                    | 20        | 1  | 12      | 19% [9-30], n=17              |
| DOT                            | 14        | 0  | 19      | 100% [100-100], n=14          |
| Hospitalized patients          | 13        | 1  | 19      | 100% [100-100], n=10          |

Abbreviations: DOT=directly observed therapy; IQR=interquartile range; MDR=multi-drug resistance; TB=tuberculosis

\*Based on the measure of central tendency reported in the study (mean: n=11; median: n=7)

<sup>†</sup>Forms of extrapulmonary TB differ by study but included some of the following: Miliary, meningeal, pleural, peritoneal, disseminated, blood/bone, abdominal

<sup>‡</sup>Other than age (which is reported in years), this is the percentage of the population that has the characteristic among studies that include patients with the characteristic. For example, among the 18 studies that include persons with HIV, 17 report how many people had HIV and among those, the median percentage of the population with HIV is 23%.

**Table 5.** Methods reported for the 37 models of the 33 included studies with prediction models for tuberculosis treatment outcomes

| Characteristic                                            | Studies reporting characteristic, n (%) | Categories                                            | N(%) or median [IQR]      |
|-----------------------------------------------------------|-----------------------------------------|-------------------------------------------------------|---------------------------|
| Type of outcome                                           | 37 (100)                                | Single                                                | 29 (78)                   |
|                                                           |                                         | Composite                                             | 8 (22)                    |
| Outcome                                                   | 37 (100)                                | Death                                                 | 16 (43)                   |
|                                                           |                                         | Treatment failure                                     | 6 (16)                    |
|                                                           |                                         | Default, Loss to follow-up, or treatment interruption | 6 (16)                    |
|                                                           |                                         | Unfavorable outcome                                   | 6 (16)                    |
|                                                           |                                         | Treatment success                                     | 2 (6)                     |
|                                                           |                                         | Other <sup>‡</sup>                                    | 1 (3)                     |
| Number - prevalence of outcome*                           | 32 (87)                                 | -                                                     | 94 [38-171]<br>15% [9-26] |
| Events per candidate variable <sup>†</sup>                | 30 (81)                                 | -                                                     | 6 [3-11]                  |
| Events per variable (in final model)                      | 29 (78)                                 | -                                                     | 14 [9-26]                 |
| Predictor types                                           |                                         | Clinical/epidemiologic                                | 34 (92)                   |
|                                                           |                                         | Adherence                                             | 1 (3)                     |
|                                                           |                                         | Biomarker                                             | 2 (5)                     |
| Analysis                                                  | 37 (100)                                | Logistic regression                                   | 29 (78)                   |
|                                                           |                                         | Survival analysis                                     | 3 (8)                     |
|                                                           |                                         | Machine learning                                      | 5 (14)                    |
| Method for considering predictors in multivariable models | 36 (97)                                 | All candidate predictors                              | 12 (32)                   |
|                                                           |                                         | Based on unadjusted association with outcome          | 19 (51)                   |
|                                                           |                                         | Based on clinical relevance                           | 1 (3)                     |
|                                                           |                                         | Other <sup>§</sup>                                    | 4 (14)                    |
| Selection of predictors during modeling                   | 31 (84)                                 | Full model approach                                   | 2 (6)                     |
|                                                           |                                         | Forward selection                                     | 7 (23)                    |
|                                                           |                                         | Backwards elimination                                 | 5 (16)                    |
|                                                           |                                         | Stepwise selection                                    | 8 (26)                    |
|                                                           |                                         | Random Forest                                         | 1 (3)                     |
|                                                           |                                         | Hosmer-Lemeshow model building criteria               | 4 (13)                    |
|                                                           |                                         | Bayesian model averaging                              | 3 (10)                    |
|                                                           |                                         | Pairwise selection                                    | 1 (3)                     |

|                                    |         |                                                      |                   |
|------------------------------------|---------|------------------------------------------------------|-------------------|
| P-value for consideration in model | 17 (46) | 0·01                                                 | 2 (12)            |
|                                    |         | 0·05                                                 | 3 (18)            |
|                                    |         | 0·11                                                 | 1 (6)             |
|                                    |         | 0·2                                                  | 6 (35)            |
|                                    |         | 0·25                                                 | 5 (29)            |
| P-value for retention in MV model  | 20 (54) | 0·05                                                 | 9 (45)            |
|                                    |         | 0·1                                                  | 9 (45)            |
|                                    |         | 0·15                                                 | 1 (5)             |
|                                    |         | 0·2                                                  | 1 (5)             |
| Internal validation                | 19 (51) | Split-sample                                         | 10 (53)           |
|                                    |         | Bootstrap                                            | 5 (26)            |
|                                    |         | Cross-validation                                     | 4 (21)            |
| External validation                | 6 (16)  | Temporal                                             | 1 (17)            |
|                                    |         | Geographic                                           | 1 (4)             |
|                                    |         | Setting                                              | 4 (67)            |
| Calibration                        | 17 (46) | Calibration plot <sup>¶</sup>                        | 2 (12)            |
|                                    |         | Calibration slope <sup>¶</sup>                       | 1 (6)             |
|                                    |         | Hosmer-Lemeshow goodness of fit p-value <sup>¶</sup> | 13 (77)           |
|                                    |         |                                                      | 0·51 [0·20, 0·79] |
|                                    |         | Calibration table <sup>¶</sup>                       | 2 (12)            |
|                                    |         | Mean absolute error <sup>¶</sup>                     | 1 (6)             |
| Discrimination                     | 30 (81) | C-statistic (AUROC) <sup>¶</sup>                     | 30 (100)          |
|                                    |         |                                                      | 0·75 [0·68-0·84]  |
|                                    |         | Log rank test <sup>¶</sup>                           | 2 (5)             |
| Classification                     | 18 (49) | Sensitivity <sup>  </sup>                            | 14 (78)           |
|                                    |         |                                                      | 70 [54, 78]       |
|                                    |         | Specificity <sup>  </sup>                            | 13 (72)           |
|                                    |         |                                                      | 75 [71, 88]       |
|                                    |         | Accuracy                                             | 2 (11)            |
|                                    |         | Other**                                              | 2 (11)            |
| Model presentation                 | 34 (92) | Risk score                                           | 16 (43)           |
|                                    |         | Model coefficient                                    | 8 (22)            |
|                                    |         | Nomogram                                             | 2 (6)             |
|                                    |         | Odds ratios/relative scores                          | 4 (12)            |
|                                    |         | Survey tool                                          | 1 (3)             |

Abbreviations: AUROC=area under receiver operating characteristic; c-statistic=concordance statistic

\*Prevalence of outcome in the population used to develop the prediction model (i.e. derivation/development subset if split-sample technique was used or full sample if the model was not validated or if bootstrap/cross-validation was used)

1  
2  
3 †Only 5 studies report the exact number of predictors considered. Otherwise, the number of  
4 candidate predictors was estimated from the provided tables or lists of candidate predictors in the  
5 source paper.

6 ‡Outcome is a value from 1 to 5 (1= patient completed the treatment course in frame of DOTS,  
7 2=cured, 3= quit treatment, 4=failed treatment and 5=death)

8 §Other methods of determining which variables to consider for prediction model include:  
9 principal components analysis (n=1), screening for multi-collinearity via correlation coefficient  
10 (n=1), one study used a combination of a priori and selection via univariable association, and the  
11 other used machine learning pre-processing (n=1)

12 ¶Sums to more than 100%, because some studies report multiple measures of calibration or  
13 discrimination

14 ||Based on the following cut-off methods: Youden (n=4) concordance probability (n=1),  
15 estimated at nearest 0,1 for studies that present a range of sensitivity and specificity in a table or  
16 figure (n=4), or unknown (n=5)

17 \*\*Other includes one study that reports false positive rate and one study that includes a graph of  
18 sensitivity vs. specificity.  
19  
20  
21  
22  
23  
24  
25  
26  
27  
28  
29  
30  
31  
32  
33  
34  
35  
36  
37  
38  
39  
40  
41  
42  
43  
44  
45  
46  
47  
48  
49  
50  
51  
52  
53  
54  
55  
56  
57  
58  
59  
60

1  
2  
3 **Figure 2.** Most common predictors considered and included  
4

5  
6 [See Figure 2]

7 Figure 2 legend:

8 Considered: the predictor as evaluated as a candidate predictor prior to multivariable modeling

9 Included: the predictor was considered and subsequently included in the final multivariable  
10 model  
11

12  
13 **Figure 3.** Heatmap of signaling questions from risk of bias assessment with PROBAST  
14

15  
16 [See Figure 3]  
17

18 Figure 3 legend:

19 PROBAST questions (additional details in Supplemental File 5)

20 Participants 1: What study design was used and was it appropriate?

21 Participants 2: Were all inclusion and exclusion criteria appropriate?

22 Predictors 1: Were predictors defined as assessed the same way for all participants?

23 Predictors 2: Were predictor assessments made without knowledge of data outcome?

24 Predictors 3: Are all predictors available at the time the model was intended to be used?

25 Outcome 1: Was the outcome determined appropriately?

26 Outcome 2: Was the outcome pre-specified or standard?

27 Outcome 3: Were predictors excluded from outcome definition?

28 Outcome 4: Was the outcome defined and determined in a similar way for all participants?

29 Outcome 5: Was the outcome determined without predictor information?

30 Outcome 6: Was the time interval between predictor assessment and outcome determination  
31 appropriate?  
32

33 Analysis 1: Were there a reasonable number of participants with the outcome?

34 Analysis 2: Were continuous and categorical variables handled appropriately?

35 Analysis 3: Were all enrolled participants included in the analysis?

36 Analysis 4: Were participants with missing data handled appropriately?

37 Analysis 5: Was selection of predictors based on univariable analysis avoided?

38 Analysis 6: Were complexities in data (censoring, competing risks, sampling of control  
39 participants) accounted for appropriately?  
40

41 Analysis 7: Were relevant model performance measures evaluated appropriately?

42 Analysis 8: Were model overfitting, underfitting, and optimism in the model performance  
43 accounted for?  
44

45 Analysis 9: Do predictors and their assigned weights in the final model correspond to the results  
46 from the reported multivariable analysis?  
47  
48  
49  
50  
51  
52  
53  
54  
55  
56  
57  
58  
59  
60

1  
2  
3 **Figure 4.** Summary of risk of bias and applicability assessment with PROBAST  
4

5  
6 **[See Figure 4]**  
7  
8  
9  
10  
11  
12  
13  
14  
15  
16  
17  
18  
19  
20  
21  
22  
23  
24  
25  
26  
27  
28  
29  
30  
31  
32  
33  
34  
35  
36  
37  
38  
39  
40  
41  
42  
43  
44  
45  
46  
47  
48  
49  
50  
51  
52  
53  
54  
55  
56  
57  
58  
59  
60



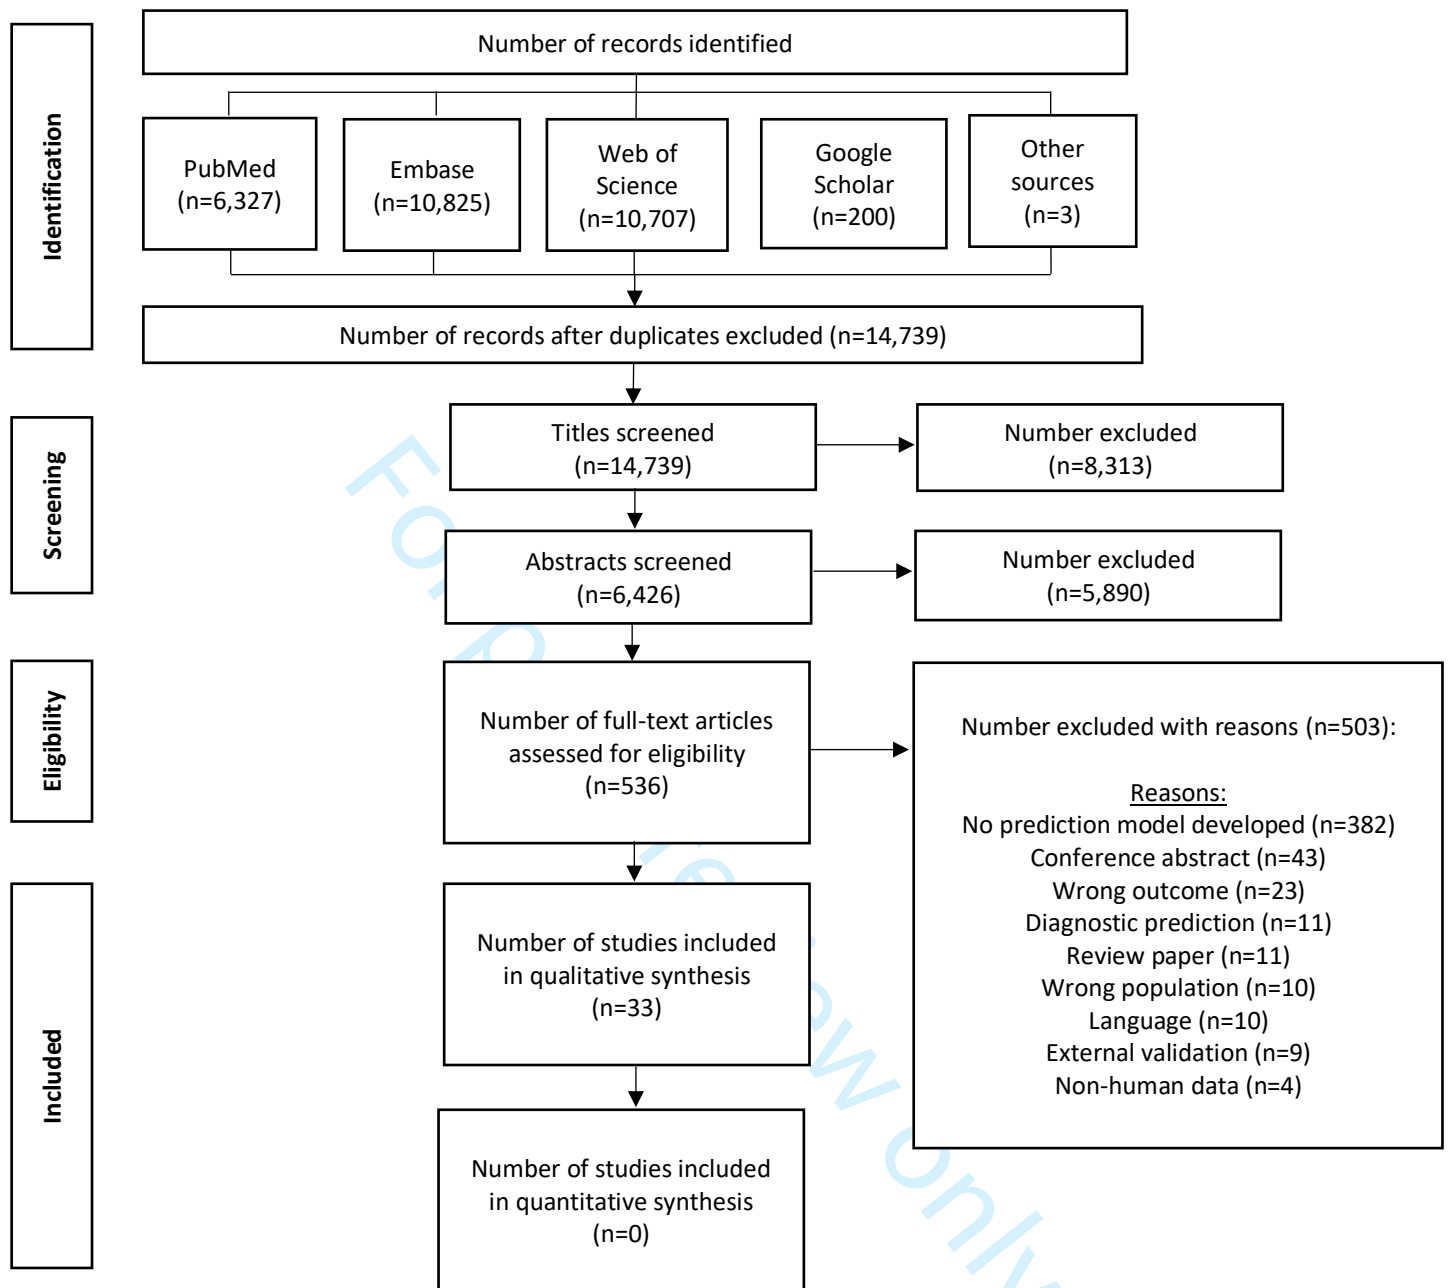

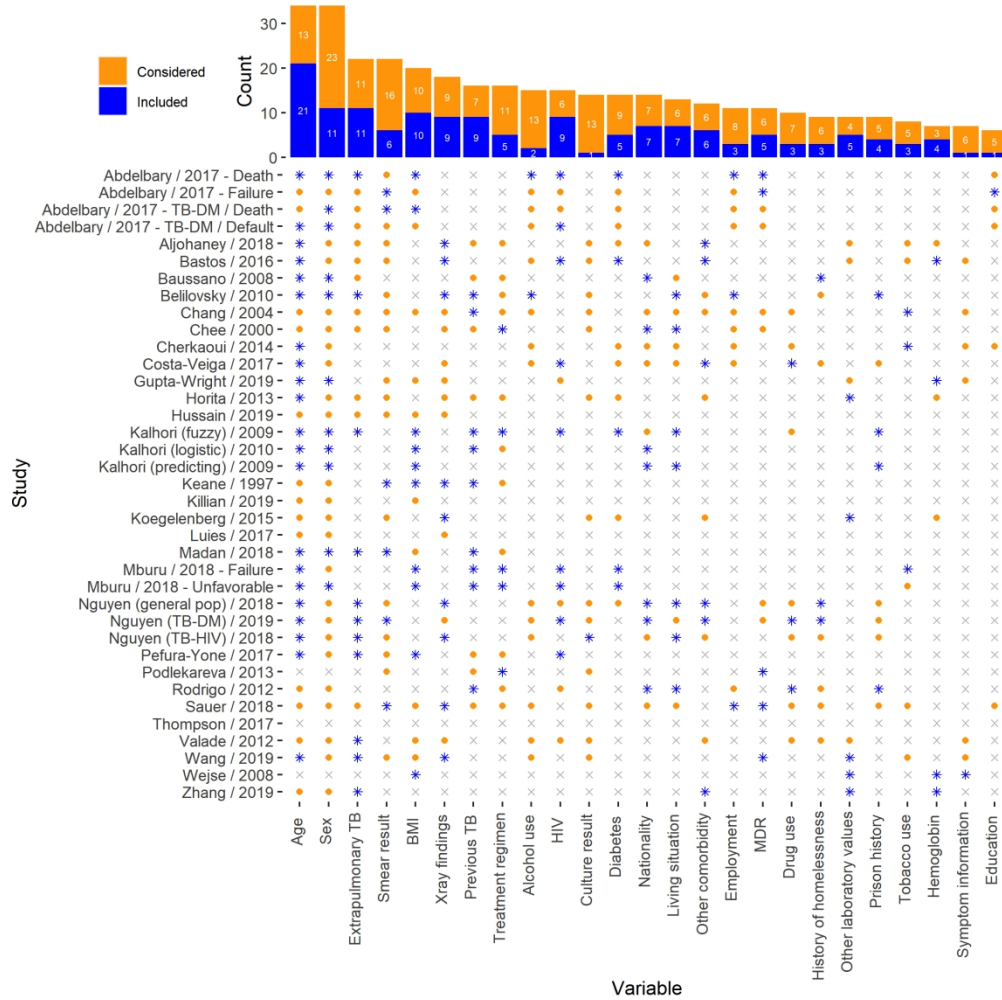

203x203mm (300 x 300 DPI)

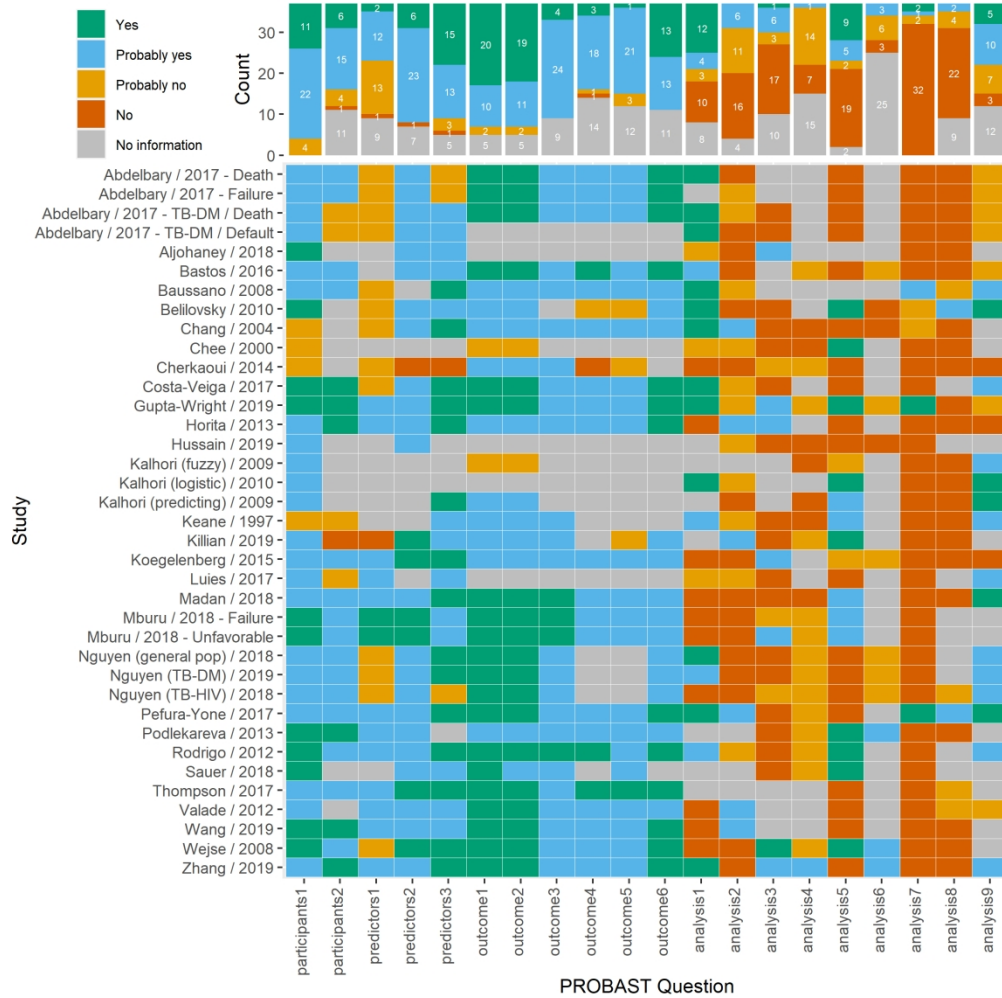

203x203mm (300 x 300 DPI)

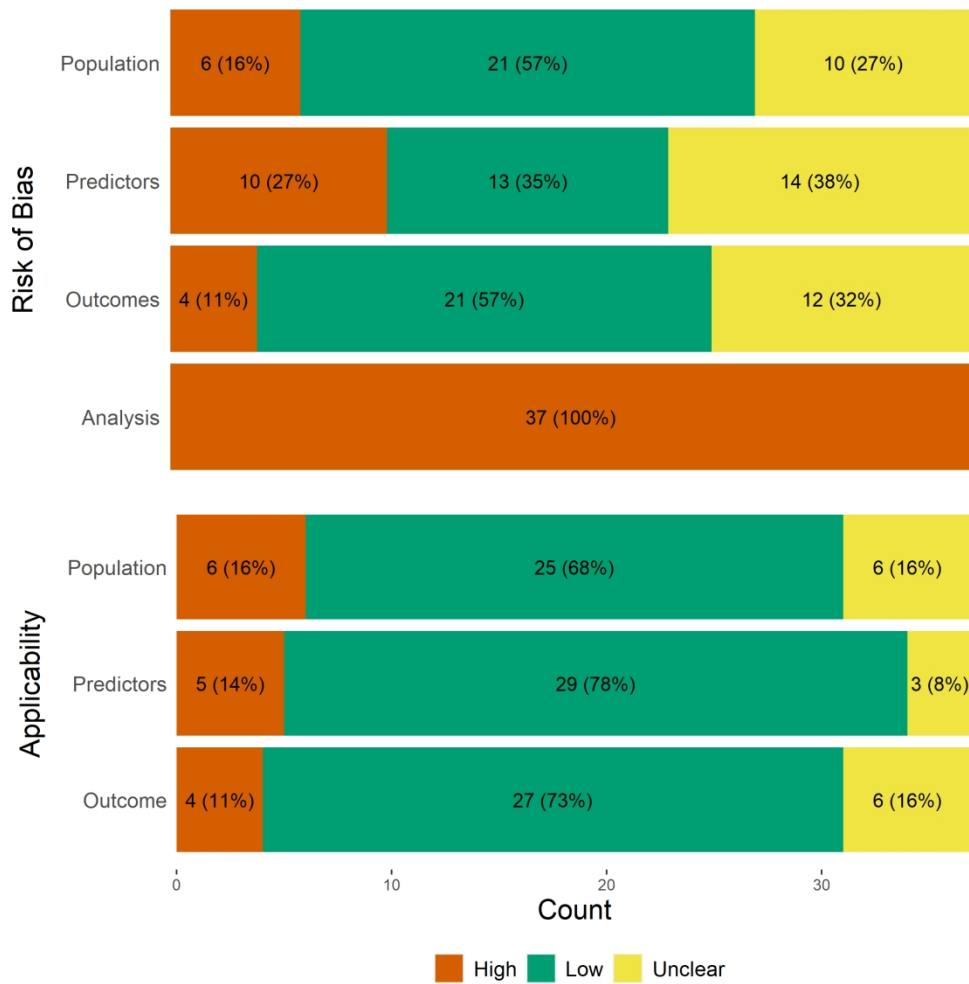

203x203mm (300 x 300 DPI)

## Supplemental File 1. PRISMA Checklist

| Section/topic                      | #  | Checklist item                                                                                                                                                                                                                                                                                              | Reported on page #            |
|------------------------------------|----|-------------------------------------------------------------------------------------------------------------------------------------------------------------------------------------------------------------------------------------------------------------------------------------------------------------|-------------------------------|
| <b>TITLE</b>                       |    |                                                                                                                                                                                                                                                                                                             |                               |
| Title                              | 1  | Identify the report as a systematic review, meta-analysis, or both.                                                                                                                                                                                                                                         | 1                             |
| <b>ABSTRACT</b>                    |    |                                                                                                                                                                                                                                                                                                             |                               |
| Structured summary                 | 2  | Provide a structured summary including, as applicable: background; objectives; data sources; study eligibility criteria, participants, and interventions; study appraisal and synthesis methods; results; limitations; conclusions and implications of key findings; systematic review registration number. | 3                             |
| <b>INTRODUCTION</b>                |    |                                                                                                                                                                                                                                                                                                             |                               |
| Rationale                          | 3  | Describe the rationale for the review in the context of what is already known.                                                                                                                                                                                                                              | 5-6                           |
| Objectives                         | 4  | Provide an explicit statement of questions being addressed with reference to participants, interventions, comparisons, outcomes, and study design (PICOS).                                                                                                                                                  | Supplemental File 2           |
| <b>METHODS</b>                     |    |                                                                                                                                                                                                                                                                                                             |                               |
| Protocol and registration          | 5  | Indicate if a review protocol exists, if and where it can be accessed (e.g., Web address), and, if available, provide registration information including registration number.                                                                                                                               | Abstract and p. 7             |
| Eligibility criteria               | 6  | Specify study characteristics (e.g., PICOS, length of follow-up) and report characteristics (e.g., years considered, language, publication status) used as criteria for eligibility, giving rationale.                                                                                                      | 7-8                           |
| Information sources                | 7  | Describe all information sources (e.g., databases with dates of coverage, contact with study authors to identify additional studies) in the search and date last searched.                                                                                                                                  | 8                             |
| Search                             | 8  | Present full electronic search strategy for at least one database, including any limits used, such that it could be repeated.                                                                                                                                                                               | Supplemental file 3           |
| Study selection                    | 9  | State the process for selecting studies (i.e., screening, eligibility, included in systematic review, and, if applicable, included in the meta-analysis).                                                                                                                                                   | 8-9                           |
| Data collection process            | 10 | Describe method of data extraction from reports (e.g., piloted forms, independently, in duplicate) and any processes for obtaining and confirming data from investigators.                                                                                                                                  | 8-9                           |
| Data items                         | 11 | List and define all variables for which data were sought (e.g., PICOS, funding sources) and any assumptions and simplifications made.                                                                                                                                                                       | 9; Supplemental Files 4 and 5 |
| Risk of bias in individual studies | 12 | Describe methods used for assessing risk of bias of individual studies (including specification of whether this was done at the study or outcome level), and how this information is to be used in any data synthesis.                                                                                      | 9; Supplemental File 5        |
| Summary measures                   | 13 | State the principal summary measures (e.g., risk ratio, difference in means).                                                                                                                                                                                                                               | N/A                           |
| Synthesis of results               | 14 | Describe the methods of handling data and combining results of studies, if done, including measures of consistency (e.g., $I^2$ ) for each meta-analysis.                                                                                                                                                   | 8-9                           |
| Risk of bias across studies        | 15 | Specify any assessment of risk of bias that may affect the cumulative evidence (e.g., publication bias, selective reporting within studies).                                                                                                                                                                | N/A                           |
| Additional analyses                | 16 | Describe methods of additional analyses (e.g., sensitivity or subgroup analyses, meta-regression), if done, indicating which were pre-specified.                                                                                                                                                            | N/A                           |
| <b>RESULTS</b>                     |    |                                                                                                                                                                                                                                                                                                             |                               |
| Study selection                    | 17 | Give numbers of studies screened, assessed for eligibility, and included in the review, with reasons for exclusions at each stage, ideally with a flow diagram.                                                                                                                                             | 11; Figure 1                  |
| Study characteristics              | 18 | For each study, present characteristics for which data were extracted (e.g., study size, PICOS, follow-up period) and provide the citations.                                                                                                                                                                | 11-13; Table 3, 4, 5          |
| Risk of bias within studies        | 19 | Present data on risk of bias of each study and, if available, any outcome level assessment (see item 12).                                                                                                                                                                                                   | 13-14; Figures 3 and 4        |

|                               |    |                                                                                                                                                                                                          |                |
|-------------------------------|----|----------------------------------------------------------------------------------------------------------------------------------------------------------------------------------------------------------|----------------|
| Results of individual studies | 20 | For all outcomes considered (benefits or harms), present, for each study: (a) simple summary data for each intervention group (b) effect estimates and confidence intervals, ideally with a forest plot. | 11-14; Table 2 |
| Synthesis of results          | 21 | Present results of each meta-analysis done, including confidence intervals and measures of consistency.                                                                                                  | N/A            |
| Risk of bias across studies   | 22 | Present results of any assessment of risk of bias across studies (see Item 15).                                                                                                                          | N/A            |
| Additional analysis           | 23 | Give results of additional analyses, if done (e.g., sensitivity or subgroup analyses, meta-regression [see Item 16]).                                                                                    | N/A            |
| <b>DISCUSSION</b>             |    |                                                                                                                                                                                                          |                |
| Summary of evidence           | 24 | Summarize the main findings including the strength of evidence for each main outcome; consider their relevance to key groups (e.g., healthcare providers, users, and policy makers).                     | 15-19          |
| Limitations                   | 25 | Discuss limitations at study and outcome level (e.g., risk of bias), and at review-level (e.g., incomplete retrieval of identified research, reporting bias).                                            | 18             |
| Conclusions                   | 26 | Provide a general interpretation of the results in the context of other evidence, and implications for future research.                                                                                  | 19             |
| <b>FUNDING</b>                |    |                                                                                                                                                                                                          |                |
| Funding                       | 27 | Describe sources of funding for the systematic review and other support (e.g., supply of data); role of funders for the systematic review.                                                               | 21             |

From: Moher D, Liberati A, Tetzlaff J, Altman DG, The PRISMA Group (2009). Preferred Reporting Items for Systematic Reviews and Meta-Analyses: The PRISMA Statement. PLoS Med 6(7): e1000097. doi:10.1371/journal.pmed1000097

**Supplemental File 2. PICOTS System**

|              |                                                                                                                                                                                                                                                                                                                                                                                                                                                                                                                                                                                                                                                                                      |
|--------------|--------------------------------------------------------------------------------------------------------------------------------------------------------------------------------------------------------------------------------------------------------------------------------------------------------------------------------------------------------------------------------------------------------------------------------------------------------------------------------------------------------------------------------------------------------------------------------------------------------------------------------------------------------------------------------------|
| Population   | Pulmonary tuberculosis cases                                                                                                                                                                                                                                                                                                                                                                                                                                                                                                                                                                                                                                                         |
| Intervention | Any prognostic model developed to predict tuberculosis treatment outcome. This includes model development studies with and without external validation                                                                                                                                                                                                                                                                                                                                                                                                                                                                                                                               |
| Comparator   | Models will be compared to each other, as there is no other relevant comparator for this systematic review                                                                                                                                                                                                                                                                                                                                                                                                                                                                                                                                                                           |
| Outcome      | TB treatment outcome. The primary outcome of interest is the probability of unsuccessful TB treatment outcome, defined by the WHO as the combination of death, treatment failure, default, and/or not evaluated, as compared to successful TB treatment outcome, defined as the combination of cure and treatment completion. Included studies should evaluate at least one of the following outcomes: cure, treatment completion, death, treatment failure, default, and not evaluated. Default and not evaluated are sometimes referred to collectively as lost to follow-up. Some prediction models will look at only single endpoints, whereas other look at composite outcomes. |
| Timing       | The timespan of prediction may vary between studies, depending on the duration of treatment and follow-up, but we expect most studies will evaluate endpoints around 6-9 months.                                                                                                                                                                                                                                                                                                                                                                                                                                                                                                     |
| Setting      | Model designed for use in clinical or hospital setting at the time of TB treatment initiation to aid in targeted treatment or programmatic support for individuals at greatest risk for unsuccessful TB treatment outcomes.                                                                                                                                                                                                                                                                                                                                                                                                                                                          |

## Supplemental File 3. Search Strategy

| Database              | Search terms                                                                                                                                                                                                                                                                                                                                                                                                                                                                                                                                                                                                                                                                                                                                                                                                                                                                                                                                                                                                                                                                                                                                                                                                                                                                                                                                                                                                                                                             |
|-----------------------|--------------------------------------------------------------------------------------------------------------------------------------------------------------------------------------------------------------------------------------------------------------------------------------------------------------------------------------------------------------------------------------------------------------------------------------------------------------------------------------------------------------------------------------------------------------------------------------------------------------------------------------------------------------------------------------------------------------------------------------------------------------------------------------------------------------------------------------------------------------------------------------------------------------------------------------------------------------------------------------------------------------------------------------------------------------------------------------------------------------------------------------------------------------------------------------------------------------------------------------------------------------------------------------------------------------------------------------------------------------------------------------------------------------------------------------------------------------------------|
| <b>PubMed</b>         | <ol style="list-style-type: none"> <li>1. ((validat*[tiab] OR predict*[ti] OR rule*[tiab])<br/>OR (predict*[tiab] AND (outcome*[tiab] OR risk*[tiab] OR model*[tiab]))<br/>OR ((history[tiab] OR variable*[tiab] OR criteria[tiab] OR scor*[tiab] OR characteristic*[tiab] OR finding*[tiab] OR factor*[tiab]) AND<br/>(predict*[tiab] OR model*[tiab] OR decision*[tiab] OR identif*[tiab] OR prognos*[tiab]))<br/>OR (decision*[tiab] AND (model*[tiab] OR clinical*[tiab] OR "Logistic Models"[Mesh]))<br/>OR (prognostic[tiab] AND (history[tiab] OR variable*[tiab] OR criteria[tiab] OR scor*[tiab] OR characteristic*[tiab] OR finding*[tiab] OR<br/>factor*[tiab] OR model*[tiab]))</li> <li>2. (stratification[tiab] OR "ROC Curve"[Mesh] OR discrimination[tiab] OR discriminate[tiab] OR "c-statistic"[tiab] OR "c statistic"[tiab] OR<br/>"area under the curve"[tiab] OR AUC[tiab] OR calibration[tiab] OR indices[tiab] OR algorithm[tiab] OR multivariable[tiab])</li> <li>3. (tuberculosis[Mesh] OR tuberculosis[tiab])</li> <li>4. (outcome*[tiab] OR mortality*[tiab] OR death*[tiab] OR fail*[tiab] OR recur*[tiab] OR relapse*[tiab] OR default*[tiab] OR<br/>abandon*[tiab] OR loss*[tiab] OR cure*[tiab] OR success*[tiab] OR unsuccess*[tiab] OR die[tiab] OR died[tiab] OR dies[tiab]))</li> <li>5. 1 OR 2</li> <li>6. 3 AND 4</li> <li>7. 5 AND 6 AND (humans[Filter]) AND ("1995"[Date - Publication] : "3000"[Date - Publication])</li> </ol> |
| <b>Embase</b>         | <ol style="list-style-type: none"> <li>1. (validat\$ or predict\$ or rule\$).ti.<br/>OR (predict\$ and (outcome\$ or risk\$ or model\$)).ti.ab.<br/>OR ((history or variable\$ or criteria or scor\$ or characteristic\$ or finding\$ or factor\$) and (predict\$ or model\$ or decision\$ or identif\$ or<br/>prognos\$)).ti.ab.<br/>OR (decision\$.ti.ab. and ((model\$ or clinical\$).ti.ab. or "statistical model"/))<br/>OR (prognostic and (history or variable\$ or criteria or scor\$ or characteristic\$ or finding\$ or factor\$ or model\$)).ti.ab.</li> <li>2. (stratification or discrimination or discriminate or c-statistic or "c statistic" or "area under the curve" or AUC or calibration or indices or<br/>algorithm or multivariable).ti.ab. or "receiver operating characteristic"/</li> <li>3. tuberculosis/ or tuberculosis.ti.ab</li> <li>4. (outcome\$ or mortality\$ or death\$ or fail\$ or recur\$ or relapse\$ or default\$ or abandon\$ or loss\$ or cure\$ or success\$ or unsuccess\$ or die<br/>or died or dies).ti.ab.</li> <li>5. 1 or 2</li> <li>6. 3 and 4</li> <li>7. 5 and 6</li> <li>8. limit 7 to (human and yr="1995 -Current")</li> </ol>                                                                                                                                                                                                                                                                                    |
| <b>Web of Science</b> | <ol style="list-style-type: none"> <li>1. TI=(validat* or predict* or rule*)<br/>OR TS=(predict* and (outcome* or risk* or model*))<br/>OR TS=((history or variable* or criteria or scor* or characteristic* or finding* or factor*) and (predict* or model* or decision* or identif* or<br/>prognos*))<br/>OR TS=(decision* and ((model* or clinical*). or "statistical model"))<br/>OR TS=(prognostic and (history or variable* or criteria or scor* or characteristic* or finding* or factor* or model*))</li> <li>2. TS=(stratification or discrimination or discriminate or c-statistic or "c statistic" or "area under the curve" or AUC or calibration or indices or<br/>algorithm or multivariable or "receiver operating characteristic")</li> <li>3. TS=(tuberculosis)</li> <li>4. TS=(outcome* or mortality* or death* or fail* or recur* or relapse* or default* or abandon* or loss* or cure* or success* or unsuccess* or<br/>die or died or dies)</li> <li>5. 1 or 2</li> <li>6. 3 and 4</li> <li>7. 5 and 6; IC Timespan=1995-2019</li> </ol>                                                                                                                                                                                                                                                                                                                                                                                                            |
| <b>Google scholar</b> | tuberculosis treatment outcome prediction prognostic model development validation                                                                                                                                                                                                                                                                                                                                                                                                                                                                                                                                                                                                                                                                                                                                                                                                                                                                                                                                                                                                                                                                                                                                                                                                                                                                                                                                                                                        |



## Supplemental File 4. CHARMS Checklist

| Domain                                | Key items                                                                                                                                                                                                                                                         | Reported on page # |
|---------------------------------------|-------------------------------------------------------------------------------------------------------------------------------------------------------------------------------------------------------------------------------------------------------------------|--------------------|
| SOURCE OF DATA                        | Source of data (e.g., cohort, case-control, randomized trial participants, or registry data)                                                                                                                                                                      |                    |
| PARTICIPANTS                          | Participant eligibility and recruitment method (e.g., consecutive participants, location, number of centers, setting, inclusion and exclusion criteria)                                                                                                           |                    |
|                                       | Participant description                                                                                                                                                                                                                                           |                    |
|                                       | Details of treatments received, if relevant                                                                                                                                                                                                                       |                    |
|                                       | Study dates                                                                                                                                                                                                                                                       |                    |
| OUTCOME(S) TO BE PREDICTED            | Definition and method for measurement of outcome                                                                                                                                                                                                                  |                    |
|                                       | Was the same outcome definition (and method for measurement) used in all patients?                                                                                                                                                                                |                    |
|                                       | Type of outcome (e.g., single or combined endpoints)                                                                                                                                                                                                              |                    |
|                                       | Was the outcome assessed without knowledge of the candidate predictors (i.e., blinded)?                                                                                                                                                                           |                    |
|                                       | Were candidate predictors part of the outcome (e.g., in panel or consensus diagnosis)?                                                                                                                                                                            |                    |
|                                       | Time of outcome occurrence or summary of duration of follow-up                                                                                                                                                                                                    |                    |
| CANDIDATE PREDICTORS (OR INDEX TESTS) | Number and type of predictors (e.g., demographics, patient history, physical examination, additional testing, disease characteristics)                                                                                                                            |                    |
|                                       | Definition and method for measurement of candidate predictors                                                                                                                                                                                                     |                    |
|                                       | Timing of predictor measurement (e.g., at patient presentation, at diagnosis, at treatment initiation)                                                                                                                                                            |                    |
|                                       | Were predictors assessed blinded for outcome, and for each other (if relevant)?                                                                                                                                                                                   |                    |
|                                       | Handling of predictors in the modelling (e.g., continuous, linear, non-linear transformations or categorised)                                                                                                                                                     |                    |
| SAMPLE SIZE                           | Number of participants and number of outcomes/events                                                                                                                                                                                                              |                    |
|                                       | Number of outcomes/events in relation to the number of candidate predictors (Events Per Variable)                                                                                                                                                                 |                    |
| MISSING DATA                          | Number of participants with any missing value (include predictors and outcomes)                                                                                                                                                                                   |                    |
|                                       | Number of participants with missing data for each predictor                                                                                                                                                                                                       |                    |
|                                       | Handling of missing data (e.g., complete-case analysis, imputation, or other methods)                                                                                                                                                                             |                    |
| MODEL DEVELOPMENT                     | Modelling method (e.g., logistic, survival, neural network, or machine learning techniques)                                                                                                                                                                       |                    |
|                                       | Modelling assumptions satisfied                                                                                                                                                                                                                                   |                    |
|                                       | Method for selection of predictors <b>for inclusion</b> in multivariable modelling (e.g., all candidate predictors, pre-selection based on unadjusted association with the outcome)                                                                               |                    |
|                                       | Method for selection of predictors <b>during multivariable modelling</b> (e.g., full model approach, backward or forward selection) and criteria used (e.g., p-value, Akaike Information Criterion)                                                               |                    |
|                                       | Shrinkage of predictor weights or regression coefficients (e.g., no shrinkage, uniform shrinkage, penalized estimation)                                                                                                                                           |                    |
| MODEL PERFORMANCE                     | Calibration (calibration plot, calibration slope, Hosmer-Lemeshow test) and Discrimination (C-statistic, D-statistic, log-rank) measures with confidence intervals                                                                                                |                    |
|                                       | Classification measures (e.g., sensitivity, specificity, predictive values, net reclassification improvement) and whether a-priori cut points were used                                                                                                           |                    |
| MODEL EVALUATION                      | Method used for testing model performance: development dataset only (random split of data, resampling methods e.g. bootstrap or cross-validation, none) or separate external validation (e.g. temporal, geographical, different setting, different investigators) |                    |
|                                       | In case of poor validation, whether model was adjusted or updated (e.g., intercept recalibrated, predictor effects adjusted, or new predictors added)                                                                                                             |                    |
| RESULTS                               | Final and other multivariable models (e.g., basic, extended, simplified) presented, including predictor weights or regression coefficients, intercept, baseline survival, model performance measures (with standard errors or confidence intervals)               |                    |
|                                       | Any alternative presentation of the final prediction models, e.g., sum score, nomogram, score chart, predictions for specific risk subgroups with performance                                                                                                     |                    |

|    |                                          |                                                                                                                                   |  |
|----|------------------------------------------|-----------------------------------------------------------------------------------------------------------------------------------|--|
| 1  |                                          | Comparison of the distribution of predictors (including missing data) for development and validation datasets                     |  |
| 2  | <b>INTERPRETATION<br/>AND DISCUSSION</b> | Interpretation of presented models (confirmatory, i.e., model useful for practice versus exploratory, i.e., more research needed) |  |
| 3  |                                          |                                                                                                                                   |  |
| 4  |                                          | Comparison with other studies, discussion of generalizability, strengths and limitations.                                         |  |
| 5  |                                          |                                                                                                                                   |  |
| 6  |                                          |                                                                                                                                   |  |
| 7  |                                          |                                                                                                                                   |  |
| 8  |                                          |                                                                                                                                   |  |
| 9  |                                          |                                                                                                                                   |  |
| 10 |                                          |                                                                                                                                   |  |
| 11 |                                          |                                                                                                                                   |  |
| 12 |                                          |                                                                                                                                   |  |
| 13 |                                          |                                                                                                                                   |  |
| 14 |                                          |                                                                                                                                   |  |
| 15 |                                          |                                                                                                                                   |  |
| 16 |                                          |                                                                                                                                   |  |
| 17 |                                          |                                                                                                                                   |  |
| 18 |                                          |                                                                                                                                   |  |
| 19 |                                          |                                                                                                                                   |  |
| 20 |                                          |                                                                                                                                   |  |
| 21 |                                          |                                                                                                                                   |  |
| 22 |                                          |                                                                                                                                   |  |
| 23 |                                          |                                                                                                                                   |  |
| 24 |                                          |                                                                                                                                   |  |
| 25 |                                          |                                                                                                                                   |  |
| 26 |                                          |                                                                                                                                   |  |
| 27 |                                          |                                                                                                                                   |  |
| 28 |                                          |                                                                                                                                   |  |
| 29 |                                          |                                                                                                                                   |  |
| 30 |                                          |                                                                                                                                   |  |
| 31 |                                          |                                                                                                                                   |  |
| 32 |                                          |                                                                                                                                   |  |
| 33 |                                          |                                                                                                                                   |  |
| 34 |                                          |                                                                                                                                   |  |
| 35 |                                          |                                                                                                                                   |  |
| 36 |                                          |                                                                                                                                   |  |
| 37 |                                          |                                                                                                                                   |  |
| 38 |                                          |                                                                                                                                   |  |
| 39 |                                          |                                                                                                                                   |  |
| 40 |                                          |                                                                                                                                   |  |
| 41 |                                          |                                                                                                                                   |  |
| 42 |                                          |                                                                                                                                   |  |
| 43 |                                          |                                                                                                                                   |  |
| 44 |                                          |                                                                                                                                   |  |
| 45 |                                          |                                                                                                                                   |  |
| 46 |                                          |                                                                                                                                   |  |
| 47 |                                          |                                                                                                                                   |  |
| 48 |                                          |                                                                                                                                   |  |
| 49 |                                          |                                                                                                                                   |  |
| 50 |                                          |                                                                                                                                   |  |
| 51 |                                          |                                                                                                                                   |  |
| 52 |                                          |                                                                                                                                   |  |
| 53 |                                          |                                                                                                                                   |  |
| 54 |                                          |                                                                                                                                   |  |
| 55 |                                          |                                                                                                                                   |  |
| 56 |                                          |                                                                                                                                   |  |
| 57 |                                          |                                                                                                                                   |  |
| 58 |                                          |                                                                                                                                   |  |
| 59 |                                          |                                                                                                                                   |  |
| 60 |                                          |                                                                                                                                   |  |

For peer review only

## Supplemental File 5. Prediction model Risk Of Bias Assessment Tool (PROBAST)

[Link](#) to full explanation and elaboration document

Citation: Moons KG, Wolff RF, Riley RD, et al. PROBAST: A Tool to Assess Risk of Bias and Applicability of Prediction Model Studies: Explanation and Elaboration. *Ann Intern Med.* 2019;170:W1–W33. doi: <https://doi.org/10.7326/M18-1377>

| <b>Domain 1: Participants</b>                                                                                                                                                                                                                                                                                             |                                                        |                                                                                                                                                                                                                                                                                                                                                                                                         |                                                                                                                                                                                                                                                                                                                                                                                                                                                                                                                                                 |                                                                                                                                                               |
|---------------------------------------------------------------------------------------------------------------------------------------------------------------------------------------------------------------------------------------------------------------------------------------------------------------------------|--------------------------------------------------------|---------------------------------------------------------------------------------------------------------------------------------------------------------------------------------------------------------------------------------------------------------------------------------------------------------------------------------------------------------------------------------------------------------|-------------------------------------------------------------------------------------------------------------------------------------------------------------------------------------------------------------------------------------------------------------------------------------------------------------------------------------------------------------------------------------------------------------------------------------------------------------------------------------------------------------------------------------------------|---------------------------------------------------------------------------------------------------------------------------------------------------------------|
| The overall aim for prediction models is to generate absolute risk predictions that are correct in new individuals. Certain data sources or designs are not suited to generate absolute probabilities. Problems may also arise if a study inappropriately includes or excludes participant groups from entering the study |                                                        |                                                                                                                                                                                                                                                                                                                                                                                                         |                                                                                                                                                                                                                                                                                                                                                                                                                                                                                                                                                 |                                                                                                                                                               |
|                                                                                                                                                                                                                                                                                                                           | <u>Signaling question</u>                              | <u>Yes/probably yes</u>                                                                                                                                                                                                                                                                                                                                                                                 | <u>No/probably no</u>                                                                                                                                                                                                                                                                                                                                                                                                                                                                                                                           | <u>No information</u>                                                                                                                                         |
| 1                                                                                                                                                                                                                                                                                                                         | What study design was used and was it appropriate?     | Yes: If a cohort design (including RCT or proper registry data) was used and you have confidence in data quality and participant enrollment is clearly described<br><br>Probably yes: a nested case-control or case-cohort design (with proper adjustment of the baseline risk/hazard in the analysis) has been used or a cohort design was used but participant enrollment was data quality is unclear | No: If a non-nested case-control design has been used<br><br>Probably no: a nested case-control study was used without proper adjustment of baseline risk/hazard                                                                                                                                                                                                                                                                                                                                                                                | If the method of participant sampling is unclear.                                                                                                             |
| 2                                                                                                                                                                                                                                                                                                                         | Were all inclusion and exclusion criteria appropriate? | Yes: Inclusion and exclusion are clear and selection participants was appropriate, so participants correspond to unselected participants of interest (i.e. the target population).<br><br>Probably yes: Inclusion and exclusion criteria are not entirely clear, but it seems like the population is representative of the target population                                                            | No: If participants are included who would already have been identified as having the outcome and so are no longer at risk of developing outcome, or if specific subgroups are excluded that may have altered the performance of the prediction model for the intended target population.<br><br>Probably no: inclusion and exclusion criteria are unclear and it seems possible that there was bias in selection of participants that could lead to the model being applied to a population that is unrepresentative of the target population. | When there is no information on whether inappropriate inclusions or exclusions took place.                                                                    |
| <b>Low risk of bias</b>                                                                                                                                                                                                                                                                                                   |                                                        | <b>High risk of bias</b>                                                                                                                                                                                                                                                                                                                                                                                |                                                                                                                                                                                                                                                                                                                                                                                                                                                                                                                                                 | <b>Unclear risk of bias</b>                                                                                                                                   |
| If the answer to all signaling questions is “Yes” or “Probably yes,” then risk of bias can be considered low. If $\geq 1$ of the answers is “No” or “Probably no,” the judgment could still be “Low risk of bias” but specific reasons should be provided why the risk of bias can be considered low.                     |                                                        | If the answer to any of the signaling questions is “No” or “Probably no,” there is a potential for bias, except if defined at low risk of bias above.                                                                                                                                                                                                                                                   |                                                                                                                                                                                                                                                                                                                                                                                                                                                                                                                                                 | If relevant information is missing for some of the signaling questions and none of the signaling questions is judged to put this domain at high risk of bias. |

| <b>Domain 2: Predictors</b>                                                                                                                                                                                                                                                                                                           |                                                                             |                                                                                                                                                                                                                                                                                                                                                                          |                                                                                                                                                                                                                                                                                                                                                                                                     |                                                                                              |
|---------------------------------------------------------------------------------------------------------------------------------------------------------------------------------------------------------------------------------------------------------------------------------------------------------------------------------------|-----------------------------------------------------------------------------|--------------------------------------------------------------------------------------------------------------------------------------------------------------------------------------------------------------------------------------------------------------------------------------------------------------------------------------------------------------------------|-----------------------------------------------------------------------------------------------------------------------------------------------------------------------------------------------------------------------------------------------------------------------------------------------------------------------------------------------------------------------------------------------------|----------------------------------------------------------------------------------------------|
| Bias in model performance can occur when the definition and measurement of predictors is flawed. Predictors are the variables evaluated for their association with the outcome of interest. Bias can occur, for example, when predictors are not defined in a similar way for all participants or knowledge of the outcome influences |                                                                             |                                                                                                                                                                                                                                                                                                                                                                          |                                                                                                                                                                                                                                                                                                                                                                                                     |                                                                                              |
|                                                                                                                                                                                                                                                                                                                                       | <u>Signaling question</u>                                                   | <u>Yes/probably yes</u>                                                                                                                                                                                                                                                                                                                                                  | <u>No/probably no</u>                                                                                                                                                                                                                                                                                                                                                                               | <u>No information</u>                                                                        |
| 1                                                                                                                                                                                                                                                                                                                                     | Were predictors defined and assessed in a similar way for all participants? | Yes: It is clear that definitions of predictors and their assessment were similar for all participants.<br><br>Probably yes: Some predictors were based off subjective judgement, but carried out by persons with the necessary skills to evaluate the predictor, or if data from multiple sources was used but predictor definitions were standardized between sources. | No: If different definitions were used for the same predictor or if predictors requiring subjective interpretation were assessed by differently experienced assessors<br><br>Probably no: Data from multiple sources was used and its unclear whether definitions were standardized between sources or if subjective measurements were likely not carried out by persons with appropriate training. | If there is no information on how predictors were defined or assessed.                       |
| 2                                                                                                                                                                                                                                                                                                                                     | Were predictor assessments made without knowledge of data outcome?          | Yes: If outcome information was stated as not used during predictor assessment or was clearly not (yet) available to those assessing predictors (i.e. prospective data collection).                                                                                                                                                                                      | If it is clear that outcome information was used when assessing predictors.                                                                                                                                                                                                                                                                                                                         | No information on whether predictors were assessed without knowledge of outcome information. |

|                                                                                                                                                                                                                                                                                                       |                                                                             |                                                                                                                                                                           |                                                                                                |                                                                                                                                                               |
|-------------------------------------------------------------------------------------------------------------------------------------------------------------------------------------------------------------------------------------------------------------------------------------------------------|-----------------------------------------------------------------------------|---------------------------------------------------------------------------------------------------------------------------------------------------------------------------|------------------------------------------------------------------------------------------------|---------------------------------------------------------------------------------------------------------------------------------------------------------------|
|                                                                                                                                                                                                                                                                                                       |                                                                             | Probably yes: If it is likely that outcome information was not used during predictor assessment, but not entirely clear (retrospective data collection/surveillance data) |                                                                                                |                                                                                                                                                               |
| 3                                                                                                                                                                                                                                                                                                     | Are all predictors available at the time the model was intended to be used? | All included predictors would be available at the time the model is intended to be used for prediction                                                                    | Predictors would not be available at the time the model is intended to be used for prediction. | No information on whether predictors would be available at the time the model is intended to be used for prediction.                                          |
| <b>Low risk of bias</b>                                                                                                                                                                                                                                                                               |                                                                             | <b>High risk of bias</b>                                                                                                                                                  |                                                                                                | <b>Unclear risk of bias</b>                                                                                                                                   |
| If the answer to all signaling questions is “Yes” or “Probably yes,” then risk of bias can be considered low. If $\geq 1$ of the answers is “No” or “Probably no,” the judgment could still be “Low risk of bias” but specific reasons should be provided why the risk of bias can be considered low. |                                                                             | If the answer to any of the signaling questions is “No” or “Probably no,” there is a potential for bias, except if defined at low risk of bias above.                     |                                                                                                | If relevant information is missing for some of the signaling questions and none of the signaling questions is judged to put this domain at high risk of bias. |

| <b>Domain 3: Outcome</b>                                                                                                                                                                                                                                                                                                                                                                                                                                                                                                     |                                                                               |                                                                                                                                                                                                                                                                                                                                                                                                                                                                                   |                                                                                                                                                                                                                                                                                                                                                            |                                                                                                     |
|------------------------------------------------------------------------------------------------------------------------------------------------------------------------------------------------------------------------------------------------------------------------------------------------------------------------------------------------------------------------------------------------------------------------------------------------------------------------------------------------------------------------------|-------------------------------------------------------------------------------|-----------------------------------------------------------------------------------------------------------------------------------------------------------------------------------------------------------------------------------------------------------------------------------------------------------------------------------------------------------------------------------------------------------------------------------------------------------------------------------|------------------------------------------------------------------------------------------------------------------------------------------------------------------------------------------------------------------------------------------------------------------------------------------------------------------------------------------------------------|-----------------------------------------------------------------------------------------------------|
| Bias in model performance can occur when methods used to determine outcomes incorrectly classify participants with or without the outcome. Bias in methods of outcome determination can result from use of suboptimal methods, tests, or criteria that lead to unacceptably high levels of errors in outcome determination, when methods are inconsistently applied across participants, or when knowledge of predictors influence outcome determination. Incorrect timing of outcome determination can also result in bias. |                                                                               |                                                                                                                                                                                                                                                                                                                                                                                                                                                                                   |                                                                                                                                                                                                                                                                                                                                                            |                                                                                                     |
|                                                                                                                                                                                                                                                                                                                                                                                                                                                                                                                              | <b>Signaling question</b>                                                     | <b>Yes/probably yes</b>                                                                                                                                                                                                                                                                                                                                                                                                                                                           | <b>No/probably no</b>                                                                                                                                                                                                                                                                                                                                      | <b>No information</b>                                                                               |
| 1                                                                                                                                                                                                                                                                                                                                                                                                                                                                                                                            | Was the outcome determined appropriately?                                     | If a method of outcome determination has been used which is considered optimal or acceptable by guidelines or previous publications on the topic<br>Note: This is about level of measurement error within the method of determining the outcome (see concerns for applicability about whether the definition of the outcome method is appropriate).                                                                                                                               | If a clearly suboptimal method has been used that causes unacceptable error in determining outcome status in participants                                                                                                                                                                                                                                  | No information on how outcome was determined                                                        |
| 2                                                                                                                                                                                                                                                                                                                                                                                                                                                                                                                            | Was the outcome pre-specified or standard?                                    | Yes: If the method of outcome determination is objective, or if a standard outcome definition is used, or if prespecified categories are used to group outcomes. (i.e. outcome assessment is based on previously published studies, published study protocol, or clinical guidelines)<br><br>Probably yes: The outcome determination is not clearly based on guidelines or previous research, but outcome assessment is objective and would not inadvertently alter study results | No: If the outcome definition was not standard and not prespecified<br><br>Probably no: a non-standard or non-prespecified outcome was used, and it is unclear whether the outcome definition could introduce bias.<br><br>*Caution with composite outcomes that favor a better model by excluding typical outcome components or including atypical events | No information on whether the outcome definition was prespecified or standard                       |
| 3                                                                                                                                                                                                                                                                                                                                                                                                                                                                                                                            | Were predictors excluded from outcome definition?                             | Yes: None of the predictors are included in the outcome definition (clearly stated)<br><br>Probably yes: None of the predictors are included in the outcome definition (assumed)                                                                                                                                                                                                                                                                                                  | If $\geq 1$ of the predictors forms part of the outcome definition                                                                                                                                                                                                                                                                                         | No information on whether predictors are excluded from the outcome definition                       |
| 4                                                                                                                                                                                                                                                                                                                                                                                                                                                                                                                            | Was the outcome defined and determined in a similar way for all participants? | Yes: If outcomes were defined and determined in a similar way for all participants (clearly stated)<br><br>Probably yes: If outcomes were defined and determined in a similar way for all participants (assumed)                                                                                                                                                                                                                                                                  | If outcomes were clearly defined and determined in a different way for some participants                                                                                                                                                                                                                                                                   | No information on whether outcomes were defined or determined in a similar way for all participants |
| 5                                                                                                                                                                                                                                                                                                                                                                                                                                                                                                                            | Was the outcome determined without predictor information                      | Yes: If predictor information was not known when determining the outcome status, or outcome status determination is clearly reported as determined without knowledge of predictor information.<br><br>Probably yes: predictor information might have been available at time of outcome assessment, but outcome definition is objective and knowing information about predictors would not influence outcome                                                                       | No: If it is clear that predictor information was used when determining the outcome status<br><br>Probably no: it is likely predictor information was available at the time of outcome assessment, and outcome definition is subjective and knowledge of predictors could influence outcome determination.                                                 | No information on whether outcome was determined without knowledge of predictor information         |

|   |                                                                                          |                                                                                                                                                                                                                                                                                                                                                                                                                                  |                                                                                                                                                                                                |                                                                                                                                                               |
|---|------------------------------------------------------------------------------------------|----------------------------------------------------------------------------------------------------------------------------------------------------------------------------------------------------------------------------------------------------------------------------------------------------------------------------------------------------------------------------------------------------------------------------------|------------------------------------------------------------------------------------------------------------------------------------------------------------------------------------------------|---------------------------------------------------------------------------------------------------------------------------------------------------------------|
|   |                                                                                          | assessment (i.e. death, treatment failure based on culture results, etc)                                                                                                                                                                                                                                                                                                                                                         |                                                                                                                                                                                                |                                                                                                                                                               |
| 6 | Was the time interval between predictor assessment and outcome determination appropriate | If the time interval between predictor assessment and outcome determination was appropriate to enable the correct type and representative number of relevant outcomes to be recorded, or if no information on the time interval is required to allow a representative number of the relevant outcome occur or if predictor assessment and outcome determination were from information taken within an appropriate time interval. | If the time interval between predictor assessment and outcome determination is too short or too long to enable the correct type and representative number of relevant outcomes to be recorded. | If no information was provided on the time interval between predictor assessment and outcome determination.                                                   |
|   |                                                                                          | <b>Low risk of bias</b>                                                                                                                                                                                                                                                                                                                                                                                                          | <b>High risk of bias</b>                                                                                                                                                                       | <b>Unclear risk of bias</b>                                                                                                                                   |
|   |                                                                                          | If the answer to all signaling questions is “Yes” or “Probably yes,” then risk of bias can be considered low. If $\geq 1$ of the answers is “No” or “Probably no,” the judgment could still be “Low risk of bias” but specific reasons should be provided why the risk of bias can be considered low.                                                                                                                            | If the answer to any of the signaling questions is “No” or “Probably no,” there is a potential for bias, except if defined at low risk of bias above.                                          | If relevant information is missing for some of the signaling questions and none of the signaling questions is judged to put this domain at high risk of bias. |

| <b>Domain 4: Analysis</b>                                                                                                                                                                                                                                                                                                                                                    |                                                                   |                                                                                                                                                                                                                                                                                                                                                                                                                                                                                                                                                                                                                                                                                                       |                                                                                                                                                                                                                                                                                                                                                                                                                                                                                                                                                                              |                                                                                                                                                                                                                                                                                                                                    |
|------------------------------------------------------------------------------------------------------------------------------------------------------------------------------------------------------------------------------------------------------------------------------------------------------------------------------------------------------------------------------|-------------------------------------------------------------------|-------------------------------------------------------------------------------------------------------------------------------------------------------------------------------------------------------------------------------------------------------------------------------------------------------------------------------------------------------------------------------------------------------------------------------------------------------------------------------------------------------------------------------------------------------------------------------------------------------------------------------------------------------------------------------------------------------|------------------------------------------------------------------------------------------------------------------------------------------------------------------------------------------------------------------------------------------------------------------------------------------------------------------------------------------------------------------------------------------------------------------------------------------------------------------------------------------------------------------------------------------------------------------------------|------------------------------------------------------------------------------------------------------------------------------------------------------------------------------------------------------------------------------------------------------------------------------------------------------------------------------------|
| Statistical analysis is a critical part of prediction model development and validation. The use of inappropriate statistical analysis methods increases the potential for bias in reported model performance measures. Model development studies include many steps where flawed methods can distort results. We recommend reviewers seek statistical advice when completing |                                                                   |                                                                                                                                                                                                                                                                                                                                                                                                                                                                                                                                                                                                                                                                                                       |                                                                                                                                                                                                                                                                                                                                                                                                                                                                                                                                                                              |                                                                                                                                                                                                                                                                                                                                    |
|                                                                                                                                                                                                                                                                                                                                                                              | <b>Signaling question</b>                                         | <b>Yes/probably yes</b>                                                                                                                                                                                                                                                                                                                                                                                                                                                                                                                                                                                                                                                                               | <b>No/probably no</b>                                                                                                                                                                                                                                                                                                                                                                                                                                                                                                                                                        | <b>No information</b>                                                                                                                                                                                                                                                                                                              |
| 1                                                                                                                                                                                                                                                                                                                                                                            | Were there a reasonable number of participants with the outcome?  | For model development studies, if the number of participants with the outcome relative to the number of candidate predictor parameters is $\geq 20$ (EPV $\geq 20$ ).*<br><br>For model validation studies, if the number of participants with the outcome is $\geq 100$ .                                                                                                                                                                                                                                                                                                                                                                                                                            | For model development studies, if the number of participants with the outcome relative to the number of candidate predictor parameters is $< 10$ (EPV $< 10$ ).*<br><br>For model validation studies, if the number of participants with the outcome is $< 100$ .                                                                                                                                                                                                                                                                                                            | For model development studies, no information on the number of candidate predictor parameters or number of participants with the outcome, such that the EPV cannot be calculated.<br><br>For model validation studies, no information on the number of participants with the outcome.                                              |
|                                                                                                                                                                                                                                                                                                                                                                              |                                                                   | * For EPVs between 10 and 20, the item should be rated as either probably yes or probably no, depending on the outcome frequency, overall model performance, and distribution of the predictors in the model. For more guidance, see references 145 to 147.                                                                                                                                                                                                                                                                                                                                                                                                                                           |                                                                                                                                                                                                                                                                                                                                                                                                                                                                                                                                                                              |                                                                                                                                                                                                                                                                                                                                    |
| 2                                                                                                                                                                                                                                                                                                                                                                            | Were continuous and categorical predictors handled appropriately? | Yes: If continuous predictors are kept as continuous or if continuous predictors are examined as linear or non-linear using restricted cubic splines or fractional polynomials.<br><br>Probably yes: If continuous predictors are not converted into $> 2$ categories when included in the model (i.e., dichotomized or categorized) using a prespecified method or in a way that avoids sparse data/would not intentionally improve statistical significance.<br><br>For model validation studies, if continuous predictors are included using the same definitions or transformations, and categorical variables are categorized using the same cut points, as compared with the development study. | No: For model development studies, if continuous predictors are converted into 2 categories when included in the model.<br><br>Probably no: If categorical predictor group definitions do not use a prespecified method or continuous variables were split into $> 2$ groups, but the decision of how to split variables is unclear.<br><br>For model validation studies, if continuous predictors are included using different definitions or transformations, or categorical variables are categorized using different cut points, as compared with the development study. | No information on whether continuous predictors are examined for nonlinearity and no information on how categorical predictor groups are defined.<br><br>For model validation studies, no information on whether the same definitions or transformations and the same cut points are used, as compared with the development study. |
| 3                                                                                                                                                                                                                                                                                                                                                                            | Were all enrolled participants included in the analysis?          | If all participants enrolled in the study are included in the data analysis.                                                                                                                                                                                                                                                                                                                                                                                                                                                                                                                                                                                                                          | If some or a subgroup of participants are inappropriately excluded from the analysis (because they were missing data, unknown outcome, outliers)                                                                                                                                                                                                                                                                                                                                                                                                                             | No information on whether all enrolled participants are included in the analysis.                                                                                                                                                                                                                                                  |
| 4                                                                                                                                                                                                                                                                                                                                                                            | Were participants with missing data handled appropriately?        | Yes: If there are no missing values of predictors or outcomes and the study explicitly reports that participants are not excluded on the basis of missing data, or if missing values are handled using multiple imputation.                                                                                                                                                                                                                                                                                                                                                                                                                                                                           | No: If participants with missing data are omitted from the analysis, or if the method of handling missing data is clearly flawed, e.g., missing indicator method or inappropriate use of last value carried forward, or                                                                                                                                                                                                                                                                                                                                                      | If there is insufficient information to determine if the method of handling missing data is appropriate                                                                                                                                                                                                                            |

|   |                                                                                                                                 |                                                                                                                                                                                                                                                                                                                                                                                                                                                                                              |                                                                                                                                                                                                                                                                                                                                                                                                                                                                                        |                                                                                                                                                                                                                                                                                                                                                                     |
|---|---------------------------------------------------------------------------------------------------------------------------------|----------------------------------------------------------------------------------------------------------------------------------------------------------------------------------------------------------------------------------------------------------------------------------------------------------------------------------------------------------------------------------------------------------------------------------------------------------------------------------------------|----------------------------------------------------------------------------------------------------------------------------------------------------------------------------------------------------------------------------------------------------------------------------------------------------------------------------------------------------------------------------------------------------------------------------------------------------------------------------------------|---------------------------------------------------------------------------------------------------------------------------------------------------------------------------------------------------------------------------------------------------------------------------------------------------------------------------------------------------------------------|
|   |                                                                                                                                 | Probably yes: If a small percentage of persons with missing data were excluded and authors provide comparison of included vs. excluded participants or if sensitivity analysis with imputation methods are convincing that bias is low                                                                                                                                                                                                                                                       | if the study had no explicit mention of methods to handle missing data.<br><br>Probably no: If authors provide comparison of included vs. excluded participants or if sensitivity analysis with imputation methods are reported, but the results are not convincing to rule out bias from excluding missing data                                                                                                                                                                       |                                                                                                                                                                                                                                                                                                                                                                     |
| 5 | Was selection of predictors based on univariable analysis avoided?                                                              | If the predictors are not selected on the basis of univariable analysis prior to multivariable modeling.                                                                                                                                                                                                                                                                                                                                                                                     | If the predictors are selected on the basis of univariable analysis prior to multivariable modeling.                                                                                                                                                                                                                                                                                                                                                                                   | If there is no information to indicate that univariable selection is avoided.                                                                                                                                                                                                                                                                                       |
| 6 | Were complexities in the data (censoring, competing risks, sampling of control participants) accounted for appropriately?       | If any complexities in the data are accounted for appropriately, or if it is clear that any potential data complexities have been identified appropriately as unimportant.                                                                                                                                                                                                                                                                                                                   | If complexities in the data that could affect model performance are ignored. For example, case-control studies that do not estimate baseline risk or studies with censoring or competing risks that do not use survival analysis or other appropriate methods.                                                                                                                                                                                                                         | No information is provided on whether complexities in the data are present or accounted for appropriately if present.                                                                                                                                                                                                                                               |
| 7 | Were relevant model performance measures evaluated appropriately?                                                               | Yes: If both calibration (via calibration plot) and discrimination (c-index) are evaluated appropriately (including relevant measures tailored for models predicting survival outcomes).<br><br>Probably yes: if authors present a table of predicted probabilities with confidence intervals and corresponding outcome frequencies across subgroups                                                                                                                                         | If both calibration and discrimination are not evaluated, or if only goodness-of-fit tests (Hosmer-Lemeshow test), are used to evaluate calibration or if for models predicting survival outcomes performance measures accounting for censoring are not used, or if classification measures (like sensitivity, specificity, or predictive values) were presented using predicted probability thresholds derived from the data set at hand, but calibration is not otherwise evaluated. | Either calibration or discrimination are not reported, or no information is provided as to whether appropriate performance measures for survival outcomes are used (e.g., references to relevant literature or specific mention of methods, such as using Kaplan–Meier estimates), or no information on thresholds for estimating classification measures is given. |
| 8 | Were model overfitting, underfitting, and optimism in model performance accounted for?                                          | Yes: If internal validation techniques (bootstrapping and cross-validation) including all model development procedures, were used to account for any optimism in model fitting, and subsequent adjustment of the model performance estimates were applied.<br><br>Probably yes: If internal validation was used and optimism was estimated as very low, and then optimism-corrected performance measures were not appropriately calculated (accounting for all model development procedures) | No: If no internal validation has been performed, or if internal validation consists only of a single random split-sample of participant data.<br><br>Probably no: Internal validation with bootstrapping or cross-validation was conducted but did not include all model development procedures including any variable selection or were not used to correct model performance measures.                                                                                              | No information: No information is provided on whether internal validation techniques, including all model development procedures, have been applied.                                                                                                                                                                                                                |
| 9 | Do predictors and their assigned weights in the final model correspond to the results from the reported multivariable analysis? | If the predictors and regression coefficients in the final model correspond to reported results from multivariable analysis.                                                                                                                                                                                                                                                                                                                                                                 | If the predictors and regression coefficients in the final model do not correspond to reported results from multivariable analysis. (i.e. rounding of model coefficients to create a “risk score” are inappropriately determined).                                                                                                                                                                                                                                                     | If it is unclear whether the regression coefficients in the final model correspond to reported results from multivariable analysis.                                                                                                                                                                                                                                 |
|   |                                                                                                                                 | <b>Low risk of bias</b>                                                                                                                                                                                                                                                                                                                                                                                                                                                                      | <b>High risk of bias</b>                                                                                                                                                                                                                                                                                                                                                                                                                                                               | <b>Unclear risk of bias</b>                                                                                                                                                                                                                                                                                                                                         |
|   |                                                                                                                                 | If the answer to all signaling questions is “Yes” or “Probably yes,” then risk of bias can be considered low. If $\geq 1$ of the answers is “No” or “Probably no,” the judgment could still be “Low risk of bias” but specific reasons should be provided why the risk of bias can be considered low.                                                                                                                                                                                        | If the answer to any of the signaling questions is “No” or “Probably no,” there is a potential for bias, except if defined at low risk of bias above.                                                                                                                                                                                                                                                                                                                                  | If relevant information is missing for some of the signaling questions and none of the signaling questions is judged to put this domain at high risk of bias.                                                                                                                                                                                                       |

|                      |               |                    |                        |
|----------------------|---------------|--------------------|------------------------|
| <b>Applicability</b> |               |                    |                        |
|                      | <b>Domain</b> | <b>Low concern</b> | <b>High concern</b>    |
|                      |               |                    | <b>Unclear concern</b> |

|    |                                                                                                                       |                                                                                                                 |                                                                                                                                      |                                                                                                 |
|----|-----------------------------------------------------------------------------------------------------------------------|-----------------------------------------------------------------------------------------------------------------|--------------------------------------------------------------------------------------------------------------------------------------|-------------------------------------------------------------------------------------------------|
| 1  | <u>Participants</u> : do you have concern that the included participants or setting do not match the review question? | Included participants and clinical setting match the review question.                                           | Included participants and clinical setting were different from the review question.                                                  | If relevant information about the participants and clinical setting are not reported.           |
| 2  |                                                                                                                       |                                                                                                                 |                                                                                                                                      |                                                                                                 |
| 3  | <u>Predictors</u> : does the definition, assessment, or timing of predictors match the review questions?              | Definition, assessment, and timing of predictors match the review question.                                     | Definition, assessment, or timing of predictors were different from the review question                                              | If relevant information about the predictors is not reported.                                   |
| 4  |                                                                                                                       |                                                                                                                 |                                                                                                                                      |                                                                                                 |
| 5  | <u>Outcome</u> : does the definition, timing, or determination of outcome match the review question?                  | Outcome definition, timing, and method of determination defines the outcome as intended by the review question. | Choice of outcome definition, timing, and method of outcome determination defines another outcome as intended by the review question | If relevant information about the outcome, timing, and method of determination is not reported. |
| 6  |                                                                                                                       |                                                                                                                 |                                                                                                                                      |                                                                                                 |
| 7  |                                                                                                                       |                                                                                                                 |                                                                                                                                      |                                                                                                 |
| 8  |                                                                                                                       |                                                                                                                 |                                                                                                                                      |                                                                                                 |
| 9  |                                                                                                                       |                                                                                                                 |                                                                                                                                      |                                                                                                 |
| 10 |                                                                                                                       |                                                                                                                 |                                                                                                                                      |                                                                                                 |
| 11 |                                                                                                                       |                                                                                                                 |                                                                                                                                      |                                                                                                 |
| 12 |                                                                                                                       |                                                                                                                 |                                                                                                                                      |                                                                                                 |
| 13 |                                                                                                                       |                                                                                                                 |                                                                                                                                      |                                                                                                 |
| 14 |                                                                                                                       |                                                                                                                 |                                                                                                                                      |                                                                                                 |
| 15 |                                                                                                                       |                                                                                                                 |                                                                                                                                      |                                                                                                 |
| 16 |                                                                                                                       |                                                                                                                 |                                                                                                                                      |                                                                                                 |
| 17 |                                                                                                                       |                                                                                                                 |                                                                                                                                      |                                                                                                 |
| 18 |                                                                                                                       |                                                                                                                 |                                                                                                                                      |                                                                                                 |
| 19 |                                                                                                                       |                                                                                                                 |                                                                                                                                      |                                                                                                 |
| 20 |                                                                                                                       |                                                                                                                 |                                                                                                                                      |                                                                                                 |
| 21 |                                                                                                                       |                                                                                                                 |                                                                                                                                      |                                                                                                 |
| 22 |                                                                                                                       |                                                                                                                 |                                                                                                                                      |                                                                                                 |
| 23 |                                                                                                                       |                                                                                                                 |                                                                                                                                      |                                                                                                 |
| 24 |                                                                                                                       |                                                                                                                 |                                                                                                                                      |                                                                                                 |
| 25 |                                                                                                                       |                                                                                                                 |                                                                                                                                      |                                                                                                 |
| 26 |                                                                                                                       |                                                                                                                 |                                                                                                                                      |                                                                                                 |
| 27 |                                                                                                                       |                                                                                                                 |                                                                                                                                      |                                                                                                 |
| 28 |                                                                                                                       |                                                                                                                 |                                                                                                                                      |                                                                                                 |
| 29 |                                                                                                                       |                                                                                                                 |                                                                                                                                      |                                                                                                 |
| 30 |                                                                                                                       |                                                                                                                 |                                                                                                                                      |                                                                                                 |
| 31 |                                                                                                                       |                                                                                                                 |                                                                                                                                      |                                                                                                 |
| 32 |                                                                                                                       |                                                                                                                 |                                                                                                                                      |                                                                                                 |
| 33 |                                                                                                                       |                                                                                                                 |                                                                                                                                      |                                                                                                 |
| 34 |                                                                                                                       |                                                                                                                 |                                                                                                                                      |                                                                                                 |
| 35 |                                                                                                                       |                                                                                                                 |                                                                                                                                      |                                                                                                 |
| 36 |                                                                                                                       |                                                                                                                 |                                                                                                                                      |                                                                                                 |
| 37 |                                                                                                                       |                                                                                                                 |                                                                                                                                      |                                                                                                 |
| 38 |                                                                                                                       |                                                                                                                 |                                                                                                                                      |                                                                                                 |
| 39 |                                                                                                                       |                                                                                                                 |                                                                                                                                      |                                                                                                 |
| 40 |                                                                                                                       |                                                                                                                 |                                                                                                                                      |                                                                                                 |
| 41 |                                                                                                                       |                                                                                                                 |                                                                                                                                      |                                                                                                 |
| 42 |                                                                                                                       |                                                                                                                 |                                                                                                                                      |                                                                                                 |
| 43 |                                                                                                                       |                                                                                                                 |                                                                                                                                      |                                                                                                 |
| 44 |                                                                                                                       |                                                                                                                 |                                                                                                                                      |                                                                                                 |
| 45 |                                                                                                                       |                                                                                                                 |                                                                                                                                      |                                                                                                 |
| 46 |                                                                                                                       |                                                                                                                 |                                                                                                                                      |                                                                                                 |
| 47 |                                                                                                                       |                                                                                                                 |                                                                                                                                      |                                                                                                 |
| 48 |                                                                                                                       |                                                                                                                 |                                                                                                                                      |                                                                                                 |
| 49 |                                                                                                                       |                                                                                                                 |                                                                                                                                      |                                                                                                 |
| 50 |                                                                                                                       |                                                                                                                 |                                                                                                                                      |                                                                                                 |
| 51 |                                                                                                                       |                                                                                                                 |                                                                                                                                      |                                                                                                 |
| 52 |                                                                                                                       |                                                                                                                 |                                                                                                                                      |                                                                                                 |
| 53 |                                                                                                                       |                                                                                                                 |                                                                                                                                      |                                                                                                 |
| 54 |                                                                                                                       |                                                                                                                 |                                                                                                                                      |                                                                                                 |
| 55 |                                                                                                                       |                                                                                                                 |                                                                                                                                      |                                                                                                 |
| 56 |                                                                                                                       |                                                                                                                 |                                                                                                                                      |                                                                                                 |
| 57 |                                                                                                                       |                                                                                                                 |                                                                                                                                      |                                                                                                 |
| 58 |                                                                                                                       |                                                                                                                 |                                                                                                                                      |                                                                                                 |
| 59 |                                                                                                                       |                                                                                                                 |                                                                                                                                      |                                                                                                 |
| 60 |                                                                                                                       |                                                                                                                 |                                                                                                                                      |                                                                                                 |

For peer review only



## Supplemental File 6. Model outcome definitions

| Study ID                           | Outcome category                                  | Full outcome definition from the source paper                                                                                                                                                                                                                                                                                                                                                                                                                                                                                                                                                                                                                                                                                                                                    |
|------------------------------------|---------------------------------------------------|----------------------------------------------------------------------------------------------------------------------------------------------------------------------------------------------------------------------------------------------------------------------------------------------------------------------------------------------------------------------------------------------------------------------------------------------------------------------------------------------------------------------------------------------------------------------------------------------------------------------------------------------------------------------------------------------------------------------------------------------------------------------------------|
| Hussain / 2019                     | Treatment completion                              | The target variable TreatmentComplete consists of 64.37% positive (treatment complete) and 35.62% negative (treatment incomplete)                                                                                                                                                                                                                                                                                                                                                                                                                                                                                                                                                                                                                                                |
| Abdelbary / 2017 - Death           | Death                                             | All causes of death (TB or non-TB related) during the course of TB treatment                                                                                                                                                                                                                                                                                                                                                                                                                                                                                                                                                                                                                                                                                                     |
| Abdelbary / 2017 - TB-DM / Death   | Death                                             | Death included all causes of death (TB and non-TB related) during the course of TB treatment                                                                                                                                                                                                                                                                                                                                                                                                                                                                                                                                                                                                                                                                                     |
| Aljohaney / 2018                   | Death                                             | Not defined, but seems to be death during hospitalization.                                                                                                                                                                                                                                                                                                                                                                                                                                                                                                                                                                                                                                                                                                                       |
| Bastos / 2016                      | Death                                             | Deaths that occurred during the first 6 months after diagnosis were classified as TB death                                                                                                                                                                                                                                                                                                                                                                                                                                                                                                                                                                                                                                                                                       |
| Gupta-Wright / 2019                | Death                                             | The outcome was mortality risk at 2 months after admission.                                                                                                                                                                                                                                                                                                                                                                                                                                                                                                                                                                                                                                                                                                                      |
| Horita / 2013                      | Death                                             | 'Discharged alive' was defined as being discharged alive and satisfying the discharge criteria, i.e., when the patient was receiving effective treatment, showed clinical improvement and negative conversion was confirmed. Negative conversion was defined as three or more consecutive sputum samples obtained on different days being smear-negative for acid-fast bacilli or when appropriate sputum sample(s) were culture-negative. 'Died in hospital' was defined as death from any cause.                                                                                                                                                                                                                                                                               |
| Koegelenberg / 2015                | Death                                             | Patients were categorised as either ICU/hospital survivors or non-survivors.                                                                                                                                                                                                                                                                                                                                                                                                                                                                                                                                                                                                                                                                                                     |
| Nguyen (general pop) / 2018        | Death                                             | Documented treatment outcome of 'completed' or 'died'                                                                                                                                                                                                                                                                                                                                                                                                                                                                                                                                                                                                                                                                                                                            |
| Nguyen (TB-DM) / 2019              | Death                                             | TB treatment outcome of either 'completed' or 'died'                                                                                                                                                                                                                                                                                                                                                                                                                                                                                                                                                                                                                                                                                                                             |
| Nguyen (TB-HIV) / 2018             | Death                                             | Given the main purpose of our study is to predict the mortality during TB treatment in HIV-infected patients against the treatment completion, patients who had an outcome coding other than completed or died.                                                                                                                                                                                                                                                                                                                                                                                                                                                                                                                                                                  |
| Pefura-Yone / 2017                 | Death                                             | At treatment completion, patients are ranked into the following mutually exclusive categories 1) cured-patient with negative smear at the last month of treatment and at least one of the preceding months; 2) treatment completed-patient who has completed the treatment and for whom the smear results at the end of the last month are not available; 3) failure-patient with positive smear at the 5th month or later during treatment; 4) death-death from any cause during treatment; 5) defaulter-patient who's treatment has been interrupted for at least two consecutive months; 6) transfer-patient transferred to complete his treatment in another center and who's treatment outcome is unknown Cured and treatment completed are considered successful treatment |
| Podlekareva / 2013                 | Death                                             | Death within 12 months of TB diagnosis                                                                                                                                                                                                                                                                                                                                                                                                                                                                                                                                                                                                                                                                                                                                           |
| Valade / 2012                      | Death                                             | Final outcomes of survival or death were recorded                                                                                                                                                                                                                                                                                                                                                                                                                                                                                                                                                                                                                                                                                                                                |
| Wang / 2019                        | Death                                             | The outcome was estimated with all-cause mortality, with the mortality in 12 months as the primary outcome and the mortality in 3, 6, 9 months as other outcome                                                                                                                                                                                                                                                                                                                                                                                                                                                                                                                                                                                                                  |
| Wejse / 2008                       | Death                                             | Mortality: ability to predict death                                                                                                                                                                                                                                                                                                                                                                                                                                                                                                                                                                                                                                                                                                                                              |
| Zhang / 2019                       | Death                                             | Primary treatment outcome was documented either survival or death when HIV/TB co-infected patients left hospital. Patients who survived when discharged received 12-month follow-up, and the date of last known alive was documented in electronic medical records base on records of last follow-up                                                                                                                                                                                                                                                                                                                                                                                                                                                                             |
| Abdelbary / 2017 - Failure         | Treatment failure                                 | Treatment failure indicated smear-positive persistence at or after 5 months of treatment with first-line anti-TB medications.                                                                                                                                                                                                                                                                                                                                                                                                                                                                                                                                                                                                                                                    |
| Kalhari (logistic) / 2010          | Treatment failure                                 | The dependent variable was failing in treatment course completion.                                                                                                                                                                                                                                                                                                                                                                                                                                                                                                                                                                                                                                                                                                               |
| Keane / 1997                       | Treatment failure                                 | Failing to clear the sputum of acid-fast bacilli with standard treatment and having to start second line therapy                                                                                                                                                                                                                                                                                                                                                                                                                                                                                                                                                                                                                                                                 |
| Luies / 2017                       | Treatment failure                                 | From the original samples, all treatment failure cases were included.                                                                                                                                                                                                                                                                                                                                                                                                                                                                                                                                                                                                                                                                                                            |
| Mburu / 2018 - Failure             | Treatment failure                                 | The secondary analyses only compared 'cures' versus 'failures' at similar time points as is the standard practice when examining chemotherapy efficacy                                                                                                                                                                                                                                                                                                                                                                                                                                                                                                                                                                                                                           |
| Thompson / 2017                    | Treatment failure                                 | Patients' clinical outcomes were classified as 'cured' if they proved and maintained sputum culture negativity by month 6 after treatment initiation (M6), 'failed' if the M6 culture was still positive, and 'un-evaluable' if contamination caused uncertainty in outcome. We note that none of the treatment failures achieved culture negativity at any time point during treatment.                                                                                                                                                                                                                                                                                                                                                                                         |
| Abdelbary / 2017 - TB-DM / Default | Default, Abandon, or LTF (interruption >2 months) | Never defined                                                                                                                                                                                                                                                                                                                                                                                                                                                                                                                                                                                                                                                                                                                                                                    |
| Belilovsky / 2010                  | Default, Abandon, or LTF (interruption >2 months) | We evaluated TI initiated by the patient (significant noncompliance with the doctor's prescribed course of treatment and serious violations of public order in hospitals) resulting in inpatient treatment cancellation.                                                                                                                                                                                                                                                                                                                                                                                                                                                                                                                                                         |
| Chang / 2004                       | Default, Abandon, or LTF                          | Default was defined as failure to collect drugs for 2 months or more after registration                                                                                                                                                                                                                                                                                                                                                                                                                                                                                                                                                                                                                                                                                          |



|    |                                                   |                                                                                                                                                                                                                                                                                                                                                                                                                                                                                                                                                                                                                                                                                                                                                                                                                                      |
|----|---------------------------------------------------|--------------------------------------------------------------------------------------------------------------------------------------------------------------------------------------------------------------------------------------------------------------------------------------------------------------------------------------------------------------------------------------------------------------------------------------------------------------------------------------------------------------------------------------------------------------------------------------------------------------------------------------------------------------------------------------------------------------------------------------------------------------------------------------------------------------------------------------|
|    | (interruption >2 months)                          |                                                                                                                                                                                                                                                                                                                                                                                                                                                                                                                                                                                                                                                                                                                                                                                                                                      |
| 1  |                                                   |                                                                                                                                                                                                                                                                                                                                                                                                                                                                                                                                                                                                                                                                                                                                                                                                                                      |
| 2  | Default, Abandon, or LTF (interruption >2 months) | Defaulter or cases were defined as patients on anti-tuberculosis treatment at the TBCU who failed to turn up for their scheduled appointments despite usual attempts to recall them by phone or mail, as described below, and from whom at least one home visit during the study was recorded                                                                                                                                                                                                                                                                                                                                                                                                                                                                                                                                        |
| 3  | Chee / 2000                                       |                                                                                                                                                                                                                                                                                                                                                                                                                                                                                                                                                                                                                                                                                                                                                                                                                                      |
| 4  | Default, Abandon, or LTF (interruption >2 months) | Treatment default was defined as an interruption in TB treatment for >=2 consecutive months.                                                                                                                                                                                                                                                                                                                                                                                                                                                                                                                                                                                                                                                                                                                                         |
| 5  | Cherkaoui / 2014                                  |                                                                                                                                                                                                                                                                                                                                                                                                                                                                                                                                                                                                                                                                                                                                                                                                                                      |
| 6  | Default, Abandon, or LTF (interruption >2 months) | Interruption of treatment for any reason for more than 2 months, non-completion of treatment within 9 months when the patient is placed on a 6 month regimen. or drug intake of <80% the prescribed dose.                                                                                                                                                                                                                                                                                                                                                                                                                                                                                                                                                                                                                            |
| 7  | Rodrigo / 2012                                    |                                                                                                                                                                                                                                                                                                                                                                                                                                                                                                                                                                                                                                                                                                                                                                                                                                      |
| 8  | Treatment success (cure + completion)             | For each patient dependent variable was recorded whether or not the patient finished the treatment course and get cured.                                                                                                                                                                                                                                                                                                                                                                                                                                                                                                                                                                                                                                                                                                             |
| 9  | Kalhari (predicting) / 2009                       |                                                                                                                                                                                                                                                                                                                                                                                                                                                                                                                                                                                                                                                                                                                                                                                                                                      |
| 10 | Unfavorable outcome (death + failure)             | The primary outcome was treatment failure, which we defined as failure of therapy or death.                                                                                                                                                                                                                                                                                                                                                                                                                                                                                                                                                                                                                                                                                                                                          |
| 11 | Sauer / 2018                                      |                                                                                                                                                                                                                                                                                                                                                                                                                                                                                                                                                                                                                                                                                                                                                                                                                                      |
| 12 | Unfavorable outcome (death, failure, LTF, NE)     | Treatment interruption or default, treatment failure, transferred out cases and those lost to follow-up were grouped as 'unsuccessful outcomes'                                                                                                                                                                                                                                                                                                                                                                                                                                                                                                                                                                                                                                                                                      |
| 13 | Baussano / 2008                                   |                                                                                                                                                                                                                                                                                                                                                                                                                                                                                                                                                                                                                                                                                                                                                                                                                                      |
| 14 | Unfavorable outcome (death, failure, LTF, NE)     | In line with WHO criteria, SVIG-TB categorized a six possible and mutually exclusive categories for treatment outcomes, grouped in this study into a binary outcome: (i) Successful outcome-if PTB patients were treated before and declared cured, including both negative smear microscopy at the end of treatment at least one previous follow-up test and in case of not providing sputum samples, cure is declared if treatment completed and absent of disease clinical evidences (categories 1 and 2). (ii) Unsuccessful outcome-if treatment of PTB patients resulted in failure (i.e. remaining smear-positive after 5 months of treatment, cat. 3), default (i.e. patients who interrupted their treatment for two consecutive months or more after registration, cat. 4), death (cat. 5) or were transferred-out (cat. 6) |
| 15 | Costa-Veiga / 2017                                |                                                                                                                                                                                                                                                                                                                                                                                                                                                                                                                                                                                                                                                                                                                                                                                                                                      |
| 16 | Unfavorable outcome (death, failure, LTF, NE)     | We label 'Cured' and 'Treatment Complete' to be favorable outcomes and 'Died', 'Treatment failed', and 'Lost to follow-up' to be unfavorable outcomes                                                                                                                                                                                                                                                                                                                                                                                                                                                                                                                                                                                                                                                                                |
| 17 | Killian / 2019                                    |                                                                                                                                                                                                                                                                                                                                                                                                                                                                                                                                                                                                                                                                                                                                                                                                                                      |
| 18 | Unfavorable outcome (death, failure, LTF, NE)     | Favourable treatment outcomes included cure and treatment completed. Unfavourable treatment outcomes included death, loss to follow-up, treatment failure, transfer out, or a switch to MDR TB treatment.                                                                                                                                                                                                                                                                                                                                                                                                                                                                                                                                                                                                                            |
| 19 | Madan / 2018                                      |                                                                                                                                                                                                                                                                                                                                                                                                                                                                                                                                                                                                                                                                                                                                                                                                                                      |
| 20 | Unfavorable outcome (death, failure, LTF, NE)     | The primary analyses compared favorable versus unfavorable outcomes at end of treatment                                                                                                                                                                                                                                                                                                                                                                                                                                                                                                                                                                                                                                                                                                                                              |
| 21 | Mburu / 2018 - Unfavorable                        |                                                                                                                                                                                                                                                                                                                                                                                                                                                                                                                                                                                                                                                                                                                                                                                                                                      |
| 22 | Other composite outcome                           | The values of outcomes might be any values from 1 to 5 which means different outcomes. Value 1 means patient completed the treatment course in frame of DOTS, 2 means the patient has been cured, 3 means patients has quitted the course, 4 means patients has failed and finally 5 is a sign of dead as outcome of TB treatment course                                                                                                                                                                                                                                                                                                                                                                                                                                                                                             |
| 23 | Kalhari (fuzzy) / 2009                            |                                                                                                                                                                                                                                                                                                                                                                                                                                                                                                                                                                                                                                                                                                                                                                                                                                      |

## Supplemental File 7. Model presentation

| Study ID                           | Final model                                                                                                                                                                                                                                                                                                                                                                                                                                                                                                                                                                                                                                                                                                                                                                                                                                                                                                                                                                                                                                                                                                                                                                                                                                                                                                                      |
|------------------------------------|----------------------------------------------------------------------------------------------------------------------------------------------------------------------------------------------------------------------------------------------------------------------------------------------------------------------------------------------------------------------------------------------------------------------------------------------------------------------------------------------------------------------------------------------------------------------------------------------------------------------------------------------------------------------------------------------------------------------------------------------------------------------------------------------------------------------------------------------------------------------------------------------------------------------------------------------------------------------------------------------------------------------------------------------------------------------------------------------------------------------------------------------------------------------------------------------------------------------------------------------------------------------------------------------------------------------------------|
| Abdelbary / 2017 - Death           | 2 + 2*(Age 41-65) + 5*(Age>=65) + 2*(Male gender) + 4*(MDR TB) + 3*(HIV) + 3*(Malnutrition) + 2*(Alcoholism) + 2*(Male*diabetes) + 3*(HIV*pulmonary TB) - 1*(diabetes) - 1*(pulmonary TB)                                                                                                                                                                                                                                                                                                                                                                                                                                                                                                                                                                                                                                                                                                                                                                                                                                                                                                                                                                                                                                                                                                                                        |
| Abdelbary / 2017 - Failure         | 8*(No or low education) + 40*(MDR) + 10*(AFB smear +2) + 15*(AFB smear +3)                                                                                                                                                                                                                                                                                                                                                                                                                                                                                                                                                                                                                                                                                                                                                                                                                                                                                                                                                                                                                                                                                                                                                                                                                                                       |
| Abdelbary / 2017 - TB-DM / Death   | 2 + 3*(Male gender) + 3*(Malnutrition) - 1*(BCG vaccinated) - 1*(AFB smear positive)                                                                                                                                                                                                                                                                                                                                                                                                                                                                                                                                                                                                                                                                                                                                                                                                                                                                                                                                                                                                                                                                                                                                                                                                                                             |
| Abdelbary / 2017 - TB-DM / Default | 2 + 2*(Age<40) + 2*(Male gender) + 4*(HIV)                                                                                                                                                                                                                                                                                                                                                                                                                                                                                                                                                                                                                                                                                                                                                                                                                                                                                                                                                                                                                                                                                                                                                                                                                                                                                       |
| Aljohaney / 2018                   | Don't report final model, but show the beta coefficients. The coefficients are written as predictor (beta-coefficient): age 3 65 (2.497), congestive heart failure (1.231), bilateral disease on chest x-ray (1.192)                                                                                                                                                                                                                                                                                                                                                                                                                                                                                                                                                                                                                                                                                                                                                                                                                                                                                                                                                                                                                                                                                                             |
| Bastos / 2016                      | 3*(Hypoxemic respiratory failure) + 2*(Age>=50) + 1*(Bilateral involvement) + 1*(At least one of: HIV, diabetes, liver failure/cirrhosis, congestive heart failure, chronic respiratory disease) + 1*(Hemoglobin<12)                                                                                                                                                                                                                                                                                                                                                                                                                                                                                                                                                                                                                                                                                                                                                                                                                                                                                                                                                                                                                                                                                                             |
| Baussano / 2008                    | Nomogram with: residency status (residential vs. homeless), sex, geographic origin (non-EU vs. EU), case definition (other than definite vs. definite), treatment setting (inpatient and unknown vs. outpatient), age (continuous)                                                                                                                                                                                                                                                                                                                                                                                                                                                                                                                                                                                                                                                                                                                                                                                                                                                                                                                                                                                                                                                                                               |
| Belilovsky / 2010                  | -3.2 + 0.8*(male gender) + 0.7*(unemployment) + 0.4*(retreatment case) + 1.1*(alcohol abuse) + 0.6*(no data about alcohol) + 0.8*(severe TB form) - 0.3*(urban residence) + 0.4*(age 25-50) + 0.8*(pulmonary TB) + 0.5*(prison history)                                                                                                                                                                                                                                                                                                                                                                                                                                                                                                                                                                                                                                                                                                                                                                                                                                                                                                                                                                                                                                                                                          |
| Chang / 2004                       | Don't report final model. Just show odds ratios of predictors but don't report intercept term, which are written as predictor (OR) as follows: Current smokers (3.44), ex-smokers (2.48), history of default (10.74), no history of default (0.80),                                                                                                                                                                                                                                                                                                                                                                                                                                                                                                                                                                                                                                                                                                                                                                                                                                                                                                                                                                                                                                                                              |
| Chee / 2000                        | The OR for each predictor is as follow in the format predictor (OR): Non-Chinese race (8.08), Living with family vs. living alone/with friends (0.08), Treatment duration (1.85). Treatment duration is categorical as 6 months, 9 months, and >9 months, but only one OR is presented.                                                                                                                                                                                                                                                                                                                                                                                                                                                                                                                                                                                                                                                                                                                                                                                                                                                                                                                                                                                                                                          |
| Cherkaoui / 2014                   | 2 points for yes to the following questions: Are you younger than 50 years of age? Do you feel work is interfering with your ability to take TB treatment? Are you taking a retreatment regimen for TB? Do you or doctor think you are having moderate or severe side effects from TB treatment Are you required to get your TB treatment daily? Have you told your friends that you have TB? (1 point for no) Are you a current smoker (1 point for yes) Did you TB symptoms go away within 2 months of starting TB treatment (1 point for yes) Do you know how long your TB treatment is supposed to last (1 point for no) Have you ever smoked cigarettes (-1 point for no)                                                                                                                                                                                                                                                                                                                                                                                                                                                                                                                                                                                                                                                   |
| Costa-Veiga / 2017                 | Nomogram with: HIV, previous treatment, age class (25-44, 15-24, 45-64, >64), IV drug use, pathologies (other disease comorbidity: yes/no)                                                                                                                                                                                                                                                                                                                                                                                                                                                                                                                                                                                                                                                                                                                                                                                                                                                                                                                                                                                                                                                                                                                                                                                       |
| Gupta-Wright / 2019                | 9*(Male sex) + 7*(patient aged 55+) + 6*(currently taking ART) + 7*(unable to walk unaided) + 7*(hemoglobin <80, severe anemia) + 6*(positive on urine TB-LAM)                                                                                                                                                                                                                                                                                                                                                                                                                                                                                                                                                                                                                                                                                                                                                                                                                                                                                                                                                                                                                                                                                                                                                                   |
| Horita / 2013                      | 1*Age (years) + 10*(oxygen requirement) - 20*(albumin) + 5*(semi-dependent, ADL) + 10*(total dependent, ADL)                                                                                                                                                                                                                                                                                                                                                                                                                                                                                                                                                                                                                                                                                                                                                                                                                                                                                                                                                                                                                                                                                                                                                                                                                     |
| Hussain / 2019                     | None                                                                                                                                                                                                                                                                                                                                                                                                                                                                                                                                                                                                                                                                                                                                                                                                                                                                                                                                                                                                                                                                                                                                                                                                                                                                                                                             |
| Kalhari (fuzzy) / 2009             | Learned parameters by training set for each predictor written as predictor (learned parameter): Case type (0.467), treatment category (-0.079), risky sex (-0.945), prison (0.992), sex (0.400), recent TB infection (0.793), diabetes (2.445), low body weight (1.313), TB type (0.950), length (-0.235), previous imprisonment (2.398), age (0.237), area (0.8895), HIV (0.731)                                                                                                                                                                                                                                                                                                                                                                                                                                                                                                                                                                                                                                                                                                                                                                                                                                                                                                                                                |
| Kalhari (logistic) / 2010          | exp(-0.93 - 0.71*(gender) + 0.02*(age) - 0.02*(weight) + 0.5*(nationality) + 0.99*(prison) + 0.16*(case type))                                                                                                                                                                                                                                                                                                                                                                                                                                                                                                                                                                                                                                                                                                                                                                                                                                                                                                                                                                                                                                                                                                                                                                                                                   |
| Kalhari (predicting) / 2009        | exp(-1.58 - 0.12*(age) + 0.807*(gender) - 0.039*(nationality) - 0.263*(prison) + 0.15*(area) + 0.021*(weight))                                                                                                                                                                                                                                                                                                                                                                                                                                                                                                                                                                                                                                                                                                                                                                                                                                                                                                                                                                                                                                                                                                                                                                                                                   |
| Keane / 1997                       | Unclear. No constant term provided. Here are the predictor (OR): Mediastinal shift (2.1), average smear score (1.5), extensive lesions (3.6), any previous treatment (2.3), cavities (1.7), weight (0.98)                                                                                                                                                                                                                                                                                                                                                                                                                                                                                                                                                                                                                                                                                                                                                                                                                                                                                                                                                                                                                                                                                                                        |
| Killian / 2019                     | LEAP = LSTM rEal-time Adherence Predictor with 2 input layers, 1) LSTM with 64 hidden units and a dense layer with 48 units for the dense layer and 4 units for the penultimate layer                                                                                                                                                                                                                                                                                                                                                                                                                                                                                                                                                                                                                                                                                                                                                                                                                                                                                                                                                                                                                                                                                                                                            |
| Koegelenberg / 2015                | One point for each parameter: septic shock, HIV with CD4 < 200, creatinine > 140 (male) or >120 (female), P:F O2 ratio < 200, chest radiograph showing miliary pattern/parenchymal infiltrates, absence of TB treatment at admission                                                                                                                                                                                                                                                                                                                                                                                                                                                                                                                                                                                                                                                                                                                                                                                                                                                                                                                                                                                                                                                                                             |
| Luies / 2017                       | Written as predictor (OR): 3,5,-Dihydroxybenzoic acid (25.6), 3-(4-Hydroxy-3-methoxyphenyl) propionic acid (1.3)                                                                                                                                                                                                                                                                                                                                                                                                                                                                                                                                                                                                                                                                                                                                                                                                                                                                                                                                                                                                                                                                                                                                                                                                                 |
| Madan / 2018                       | Written as predictor (OR): New TB with 1+ smear grade (5.78), New TB with 2+ smear grade (2.69), New TB with 3+ smear grade (1.69), New TB without smear (1.67), New TB with smear positive, unknown grade (1.00), Previously treated, smear negative TB (1.35), previously treated with scanty smear (4.74), previously treated with 1+ smear grade (1.61), previously treated with 2+ smear grade (1.05), previously treated with 3+ smear grade (7.54), previously treated with no sputum smear (2.46), previously treated with unknown grade (30.37), pulmonary TB (1.83), pulmonary and extrapulmonary TB (5.86), HIV+ on ART with CD4 350-500 (8.09), HIV+ on ART with CD4 200-350 (6.14), HIV+ on ART with CD4 50-200 (16.35), HIV+ on ART with CD4 <50 (38.76), HIV+ not on ART with CD4 350-500 (53.44), HIV+ not on ART with CD4 200-350 (65.98), HIV+ not on ART with CD4 50-200 (6.94), HIV+ not on ART with CD4 <50 (49.20), HIV+ diagnosed after TB with CD4>500 (1.05), HIV+ diagnosed after TB with CD4 350-500 (2.49), HIV+ diagnosed after TB with CD4 200-350 (8.88), HIV+ diagnosed after TB with CD4 50-200 (6.79), HIV+ diagnosed after TB with CD4 <50 (13.99), Female 25-34 (9.41), Female 35-44 (1.75), Female >= 45 (4.49), Male 15-24 (10.63), Male 25-34 (2.74), Male 35-44 (2.9), Male >= 45 (3.96) |
| Mburu / 2018 - Failure             | Present relative scores for each covariate included with scores of 100, 72.61, 69.19, 55.39, 49.87, 48.74, 48.18, 46.51, 39.69, and 37.69 for hba1c, regimen, age, weight, random blood glucose, BMI, BUN, HIV positive result, ever smoker, creatinine, respectively                                                                                                                                                                                                                                                                                                                                                                                                                                                                                                                                                                                                                                                                                                                                                                                                                                                                                                                                                                                                                                                            |
| Mburu / 2018 - Unfavorable         | Present relative scores for each covariate included, not sure if this was how it should be used. Relative scores are 100, 79.38, 70.09, 63.93, 62.47, 62.63, 61.63, 55.62, 39.21, 34.48 for hba1c, regimen, creatinine, BMI, BUN, weight, age, random blood glucose, HIV positive result, male gender, respectively                                                                                                                                                                                                                                                                                                                                                                                                                                                                                                                                                                                                                                                                                                                                                                                                                                                                                                                                                                                                              |
| Nguyen (general pop) / 2018        | 6*[Age 45-64] + 12*[Age>65] + 2*[US born] + 2*[Homeless] + 4*[Resident of LTCF] + 8*[Chronic kidney failure] + 10*[Meningeal TB] + 4*[Miliary TB] + 6*[TB-CXR] + 6*[HIV positive] + 6*[HIV unknown]                                                                                                                                                                                                                                                                                                                                                                                                                                                                                                                                                                                                                                                                                                                                                                                                                                                                                                                                                                                                                                                                                                                              |
| Nguyen (TB-DM) / 2019              | 16*[Age >= 65] + 5*[US-born] + 11*[Homeless] + 20*[IDU] + 20*[Chronic kidney failure] + 20*[TB meningitis] + 13*[Miliary TB] + 6*[AFB positive smear] + 24*[Positive HIV]                                                                                                                                                                                                                                                                                                                                                                                                                                                                                                                                                                                                                                                                                                                                                                                                                                                                                                                                                                                                                                                                                                                                                        |
| Nguyen (TB-HIV) / 2018             | Prognostic score: 5*[Age >= 65] + 12*[Resident of LTCF] + 9*[Meningeal TB] + 6*[abnormal CXR] + 9*[diagnosis confirmed with positive culture or NAA] + 10*[culture not converted or unknown]                                                                                                                                                                                                                                                                                                                                                                                                                                                                                                                                                                                                                                                                                                                                                                                                                                                                                                                                                                                                                                                                                                                                     |

|    |                    |                                                                                                                                                                                                                                                                                                |
|----|--------------------|------------------------------------------------------------------------------------------------------------------------------------------------------------------------------------------------------------------------------------------------------------------------------------------------|
| 1  |                    | Model: $-6.994499 + 1.069024 * [\text{Age} \geq 65] + 2.541147 * [\text{Resident of LTCF}] + 1.998852 * [\text{Meningeal TB}] + 1.37995 * [\text{abnormal CXR}] + 1.899108 * [\text{diagnosis confirmed with positive culture or NAA}] + 2.186305 * [\text{culture not converted or unknown}]$ |
| 2  | Pefura-Yone / 2017 | $1 / (1 + \exp(-1.3120 + 0.0474 * [\text{age}] - 0.1866 * [\text{adjusted BMI}] + 1.1637 * [\text{PTB-}] + 0.5418 * [\text{ETB}] + 1.3820 * [\text{HIV}]))$                                                                                                                                    |
| 3  | Podlekareva / 2013 | $1 * [\text{DST performed}] + 2 * [\text{Initial treatment with RHZ}] + 2 * [\text{cART started before or up to 1 month after TB diagnosis}]$                                                                                                                                                  |
| 4  | Rodrigo / 2012     | $1 * [\text{Immigrant}] + 1 * [\text{Living alone}] + 1 * [\text{Living in an institution}] + 2 * [\text{Previous TB treatment}] + 2 * [\text{Linguistic barriers}] + 4 * [\text{IV drug use}] + 1 * [\text{Unknown IV drug use}]$                                                             |
| 6  | Sauer / 2018       | Negatively correlated: drug sensitivity (sensitive), employment status (employed), microscopy: 1 to 99 acid-resistant bacteria in 100 fields of view when stained by Ziehl-Nielsen, dissemination (diffuse pulmonary nodules detected)                                                         |
| 8  | Thompson / 2017    | Heatmap of differentially expressed genes                                                                                                                                                                                                                                                      |
| 9  | Valade / 2012      | Sum of three parameters: military tuberculosis (yes: +1, no: 0), required mechanical ventilation on ICU admission (yes: +1, no: 0), and required vasopressor infusion (yes: +1, no: 0).                                                                                                        |
| 11 | Wang / 2019        | Unknown                                                                                                                                                                                                                                                                                        |
| 12 | Wejse / 2008       | 1 point for each variable: cough, hemoptysis, dyspnea, chest pain, night sweating, anemia conjunctivae, tachycardia, positive funding at lung auscultation, temperature >37, BMI <18, BMI <16, MUAC <220, MUAC <200                                                                            |
| 13 | Zhang / 2019       | $2 * [\text{Anemia (HGB} < 90\text{g/L)}] + 2 * [\text{Tuberculous meningitis}] + 5 * [\text{Severe pneumonia}] + 2 * [\text{Hypoalbuminemia}] + 7 * [\text{Unexplained infections or space-occupying lesions}] + 5 * [\text{Malignancies}]$                                                   |

For peer review only

| Section/topic                      | #  | Checklist item                                                                                                                                                                                                                                                                                              | Reported on page #            |
|------------------------------------|----|-------------------------------------------------------------------------------------------------------------------------------------------------------------------------------------------------------------------------------------------------------------------------------------------------------------|-------------------------------|
| <b>TITLE</b>                       |    |                                                                                                                                                                                                                                                                                                             |                               |
| Title                              | 1  | Identify the report as a systematic review, meta-analysis, or both.                                                                                                                                                                                                                                         | 1                             |
| <b>ABSTRACT</b>                    |    |                                                                                                                                                                                                                                                                                                             |                               |
| Structured summary                 | 2  | Provide a structured summary including, as applicable: background; objectives; data sources; study eligibility criteria, participants, and interventions; study appraisal and synthesis methods; results; limitations; conclusions and implications of key findings; systematic review registration number. | 3                             |
| <b>INTRODUCTION</b>                |    |                                                                                                                                                                                                                                                                                                             |                               |
| Rationale                          | 3  | Describe the rationale for the review in the context of what is already known.                                                                                                                                                                                                                              | 5-6                           |
| Objectives                         | 4  | Provide an explicit statement of questions being addressed with reference to participants, interventions, comparisons, outcomes, and study design (PICOS).                                                                                                                                                  | Supplemental File 2           |
| <b>METHODS</b>                     |    |                                                                                                                                                                                                                                                                                                             |                               |
| Protocol and registration          | 5  | Indicate if a review protocol exists, if and where it can be accessed (e.g., Web address), and, if available, provide registration information including registration number.                                                                                                                               | Abstract and p. 7             |
| Eligibility criteria               | 6  | Specify study characteristics (e.g., PICOS, length of follow-up) and report characteristics (e.g., years considered, language, publication status) used as criteria for eligibility, giving rationale.                                                                                                      | 7-8                           |
| Information sources                | 7  | Describe all information sources (e.g., databases with dates of coverage, contact with study authors to identify additional studies) in the search and date last searched.                                                                                                                                  | 8                             |
| Search                             | 8  | Present full electronic search strategy for at least one database, including any limits used, such that it could be repeated.                                                                                                                                                                               | Supplemental file 3           |
| Study selection                    | 9  | State the process for selecting studies (i.e., screening, eligibility, included in systematic review, and, if applicable, included in the meta-analysis).                                                                                                                                                   | 8-9                           |
| Data collection process            | 10 | Describe method of data extraction from reports (e.g., piloted forms, independently, in duplicate) and any processes for obtaining and confirming data from investigators.                                                                                                                                  | 8-9                           |
| Data items                         | 11 | List and define all variables for which data were sought (e.g., PICOS, funding sources) and any assumptions and simplifications made.                                                                                                                                                                       | 9; Supplemental Files 4 and 5 |
| Risk of bias in individual studies | 12 | Describe methods used for assessing risk of bias of individual studies (including specification of whether this was done at the study or outcome level), and how this information is to be used in any data synthesis.                                                                                      | 9; Supplemental File 5        |
| Summary measures                   | 13 | State the principal summary measures (e.g., risk ratio, difference in means).                                                                                                                                                                                                                               | N/A                           |
| Synthesis of results               | 14 | Describe the methods of handling data and combining results of studies, if done, including measures of consistency (e.g., $I^2$ ) for each meta-analysis.                                                                                                                                                   | 8-9                           |
| Risk of bias across studies        | 15 | Specify any assessment of risk of bias that may affect the cumulative evidence (e.g., publication bias, selective reporting within studies).                                                                                                                                                                | N/A                           |
| Additional analyses                | 16 | Describe methods of additional analyses (e.g., sensitivity or subgroup analyses, meta-regression), if done, indicating which were pre-specified.                                                                                                                                                            | N/A                           |
| <b>RESULTS</b>                     |    |                                                                                                                                                                                                                                                                                                             |                               |
| Study selection                    | 17 | Give numbers of studies screened, assessed for eligibility, and included in the review, with reasons for exclusions at each stage, ideally with a flow diagram.                                                                                                                                             | 11; Figure 1                  |
| Study characteristics              | 18 | For each study, present characteristics for which data were extracted (e.g., study size, PICOS, follow-up period) and provide the citations.                                                                                                                                                                | 11-13; Table 3, 4, 5          |

|                               |    |                                                                                                                                                                                                          |                        |
|-------------------------------|----|----------------------------------------------------------------------------------------------------------------------------------------------------------------------------------------------------------|------------------------|
| Risk of bias within studies   | 19 | Present data on risk of bias of each study and, if available, any outcome level assessment (see item 12).                                                                                                | 13-14; Figures 3 and 4 |
| Results of individual studies | 20 | For all outcomes considered (benefits or harms), present, for each study: (a) simple summary data for each intervention group (b) effect estimates and confidence intervals, ideally with a forest plot. | 11-14; Table 2         |
| Synthesis of results          | 21 | Present results of each meta-analysis done, including confidence intervals and measures of consistency.                                                                                                  | N/A                    |
| Risk of bias across studies   | 22 | Present results of any assessment of risk of bias across studies (see Item 15).                                                                                                                          | N/A                    |
| Additional analysis           | 23 | Give results of additional analyses, if done (e.g., sensitivity or subgroup analyses, meta-regression [see Item 16]).                                                                                    | N/A                    |
| <b>DISCUSSION</b>             |    |                                                                                                                                                                                                          |                        |
| Summary of evidence           | 24 | Summarize the main findings including the strength of evidence for each main outcome; consider their relevance to key groups (e.g., healthcare providers, users, and policy makers).                     | 15-19                  |
| Limitations                   | 25 | Discuss limitations at study and outcome level (e.g., risk of bias), and at review-level (e.g., incomplete retrieval of identified research, reporting bias).                                            | 18                     |
| Conclusions                   | 26 | Provide a general interpretation of the results in the context of other evidence, and implications for future research.                                                                                  | 19                     |
| <b>FUNDING</b>                |    |                                                                                                                                                                                                          |                        |
| Funding                       | 27 | Describe sources of funding for the systematic review and other support (e.g., supply of data); role of funders for the systematic review.                                                               | 20                     |

# BMJ Open

## A systematic review of prediction models for pulmonary tuberculosis treatment outcomes in adults

|                                 |                                                                                                                                                                                                                                                                                                                                                                                                                                                                                                                                                       |
|---------------------------------|-------------------------------------------------------------------------------------------------------------------------------------------------------------------------------------------------------------------------------------------------------------------------------------------------------------------------------------------------------------------------------------------------------------------------------------------------------------------------------------------------------------------------------------------------------|
| Journal:                        | <i>BMJ Open</i>                                                                                                                                                                                                                                                                                                                                                                                                                                                                                                                                       |
| Manuscript ID                   | bmjopen-2020-044687.R1                                                                                                                                                                                                                                                                                                                                                                                                                                                                                                                                |
| Article Type:                   | Original research                                                                                                                                                                                                                                                                                                                                                                                                                                                                                                                                     |
| Date Submitted by the Author:   | 30-Dec-2020                                                                                                                                                                                                                                                                                                                                                                                                                                                                                                                                           |
| Complete List of Authors:       | Peetluk, Lauren; Vanderbilt University School of Medicine, Epidemiology<br>Ridolfi, Felipe; Instituto Nacional de Infectologia Evandro Chagas<br>Rebeiro, Peter; Vanderbilt University School of Medicine, Epidemiology;<br>Vanderbilt University School of Medicine, Division of Infectious Diseases<br>Liu, Dandan; Vanderbilt University School of Medicine, Biostatistics<br>Rolla, Valeria; Instituto Nacional de Infectologia Evandro Chagas<br>Sterling, Timothy; Vanderbilt University School of Medicine, Division of<br>Infectious Diseases |
| <b>Primary Subject Heading</b>: | Infectious diseases                                                                                                                                                                                                                                                                                                                                                                                                                                                                                                                                   |
| Secondary Subject Heading:      | Global health, Patient-centred medicine, Public health                                                                                                                                                                                                                                                                                                                                                                                                                                                                                                |
| Keywords:                       | Tuberculosis < INFECTIOUS DISEASES, Epidemiology < INFECTIOUS DISEASES, STATISTICS & RESEARCH METHODS                                                                                                                                                                                                                                                                                                                                                                                                                                                 |
|                                 |                                                                                                                                                                                                                                                                                                                                                                                                                                                                                                                                                       |

SCHOLARONE™  
Manuscripts



I, the Submitting Author has the right to grant and does grant on behalf of all authors of the Work (as defined in the below author licence), an exclusive licence and/or a non-exclusive licence for contributions from authors who are: i) UK Crown employees; ii) where BMJ has agreed a CC-BY licence shall apply, and/or iii) in accordance with the terms applicable for US Federal Government officers or employees acting as part of their official duties; on a worldwide, perpetual, irrevocable, royalty-free basis to BMJ Publishing Group Ltd ("BMJ") its licensees and where the relevant Journal is co-owned by BMJ to the co-owners of the Journal, to publish the Work in this journal and any other BMJ products and to exploit all rights, as set out in our [licence](#).

The Submitting Author accepts and understands that any supply made under these terms is made by BMJ to the Submitting Author unless you are acting as an employee on behalf of your employer or a postgraduate student of an affiliated institution which is paying any applicable article publishing charge ("APC") for Open Access articles. Where the Submitting Author wishes to make the Work available on an Open Access basis (and intends to pay the relevant APC), the terms of reuse of such Open Access shall be governed by a Creative Commons licence – details of these licences and which [Creative Commons](#) licence will apply to this Work are set out in our licence referred to above.

Other than as permitted in any relevant BMJ Author's Self Archiving Policies, I confirm this Work has not been accepted for publication elsewhere, is not being considered for publication elsewhere and does not duplicate material already published. I confirm all authors consent to publication of this Work and authorise the granting of this licence.

1  
2  
3 **A systematic review of prediction models for pulmonary tuberculosis**  
4 **treatment outcomes in adults**  
5  
6  
7

8 Lauren S. Peetluk, MPH,<sup>1</sup> Felipe M. Ridolfi, MD, MSc,<sup>2</sup> Peter F. Rebeiro, PhD, MHS,<sup>1,3</sup> Dandan  
9  
10 Liu, PhD,<sup>4</sup> Valeria C. Rolla, MD, PhD,<sup>2</sup> Timothy R. Sterling, MD<sup>3</sup>  
11  
12

13 <sup>1</sup>Division of Epidemiology, Department of Medicine, Vanderbilt University School of Medicine,  
14  
15 Nashville, Tennessee, USA  
16

17 <sup>2</sup>Instituto Nacional de Infectologia Evandro Chagas (INI) – Fiocruz, Rio de Janeiro, Brazil  
18

19 <sup>3</sup>Division of Infectious Diseases, Department of Medicine, Vanderbilt University School of  
20  
21 Medicine, Nashville, TN, USA  
22  
23

24 <sup>4</sup>Department of Biostatistics, Vanderbilt University School of Medicine, Nashville, TN, USA  
25  
26  
27

28 Corresponding author:

29 Lauren S. Peetluk, MPH  
30 A2209 Medical Center North  
31 1161 21st Avenue South  
32 Nashville, TN 37203  
33 E-mail: [lauren.s.peetluk@vanderbilt.edu](mailto:lauren.s.peetluk@vanderbilt.edu)  
34  
35  
36

37 Word count main text: 3676  
38  
39  
40  
41  
42  
43  
44  
45  
46  
47  
48  
49  
50  
51  
52  
53  
54  
55  
56  
57  
58  
59  
60



## **ABSTRACT**

**Objective:** To systematically review and critically evaluate prediction models developed to predict tuberculosis (TB) treatment outcomes among adults with pulmonary tuberculosis.

**Design:** Systematic review

**Data sources:** PubMed, Embase, Web of Science, and Google Scholar were searched for studies published January 1, 1995 - January 9, 2020.

**Study selection and data extraction:** Studies that developed a model to predict pulmonary TB treatment outcomes were included. Study screening, data extraction, and quality assessment were conducted independently by two reviewers. Study quality was evaluated using the Prediction model Risk Of Bias Assessment Tool (PROBAST). Data were synthesized with narrative review and in tables and figures.

**Results:** 14,739 articles were identified, 536 underwent full-text review, and 33 studies presenting 37 prediction models were included. Model outcomes included death (n=16, 43%), treatment failure (n=6, 16%), default (n=6, 16%) or a composite outcome (n=9, 25%). Most models (n=29, 78%) measured discrimination (median c-statistic=0.75; interquartile range: 0.68-0.84), and 17 (46%) reported calibration, often the Hosmer-Lemeshow test (n=13). Nineteen (51%) models were internally validated, and six (16%) were externally validated. Eighteen studies (54%) mentioned missing data, and of those, half (n=9) used complete case analysis. The most common predictors included age, sex, extrapulmonary TB, body mass index (BMI), chest x-ray results, previous TB, and HIV. Risk of bias varied across studies, but all studies had high risk of bias in their analysis.

**Conclusions:** TB outcome prediction models are heterogeneous with disparate outcome definitions, predictors, and methodology. We do not recommend applying any in clinical settings

1  
2  
3 without external validation, and encourage future researchers adhere to guidelines for developing  
4 and reporting of prediction models.  
5  
6

7 **Registration:** The study was registered on the international prospective register of systematic  
8 reviews PROSPERO (CRD42020155782)  
9  
10  
11  
12  
13  
14  
15  
16  
17  
18  
19  
20  
21  
22  
23  
24  
25  
26  
27  
28  
29  
30  
31  
32  
33  
34  
35  
36  
37  
38  
39  
40  
41  
42  
43  
44  
45  
46  
47  
48  
49  
50  
51  
52  
53  
54  
55  
56  
57  
58  
59  
60

## **ARTICLE SUMMARY:**

### **Strengths and limitations**

- Prediction models for tuberculosis treatment outcomes have the potential to inform interventions or treatment management protocols to promote cure among tuberculosis patients at the greatest risk of unsuccessful treatment outcomes, but the methods and clinical utility of existing models had not been formally evaluated.
- This was the first systematic review of prediction models for tuberculosis treatment outcomes.
- The review used a comprehensive search strategy, conducted thorough bias assessment with the Prediction Model Risk of Bias Assessment Tool (PROBAST) tool, and offers recommendations for future model development and validation studies for predicting tuberculosis treatment outcomes.
- Evidence synthesis and quality assessment were limited by incomplete reporting in primary studies
- External validation studies or studies written in languages other than English, Spanish, Portuguese, or French were excluded.

## **BACKGROUND**

Tuberculosis (TB) is one of the top ten causes of death worldwide and a leading cause of death from an infectious disease. In 2018, 10 million people developed TB and 1.45 million people died from it globally, despite widespread availability of curative treatment.[1] Global treatment success was 85% for all new and relapse TB patients in 2018. For HIV-associated TB, it was 75%. These proportions are lower than the End TB Strategy target of  $\geq 90\%$  treatment success.[2]

Heeding early recognition that *Mycobacterium tuberculosis* develops resistance rapidly in response to single-drug therapy, TB has been treated with combination therapy for more than 50 years.[3] Aside from weight-based dosing, the World Health Organization (WHO) and other TB guidelines authorities recommend a standardized approach for treatment of almost all TB patients.[4–6] The current recommendation for treatment of drug-susceptible TB includes 2 months of isoniazid, rifampin, pyrazinamide, and ethambutol, followed by 4 months of isoniazid and rifampin. However, actual treatment regimens may vary due to differences in drug tolerability, and other individual-level factors that can affect TB treatment outcomes.

Due to the long duration of TB treatment, it would be beneficial for TB outcome studies to identify early treatment predictors of unsuccessful TB treatment outcomes to identify patients needing tailored treatment approaches, such as directly observed therapy (DOT) or extended treatment course. Research suggests that individual characteristics, such as HIV, age, undernutrition, diabetes, TB disease severity, extrapulmonary TB, history of TB, adherence, alcohol use, and adverse drug reactions, are associated with unsuccessful TB treatment outcomes, but results vary by setting and patient population.[7–10]

1  
2  
3 Prediction models are defined as any combination or equation of two or more predictors,  
4  
5 such as demographic factors, medical history, physical examination, and lab tests, used for  
6  
7 estimating an individualized probability of a specific endpoint within a defined period of  
8  
9 time.[11] The large number of prediction models for TB outcomes published in recent years  
10  
11 highlights a common desire to identify TB patients at greatest risk of an unsuccessful treatment  
12  
13 outcome in order to tailor treatment strategies and promote cure. However, to date, there has not  
14  
15 been a formal synthesis or quality assessment of existing prediction models for TB treatment  
16  
17 outcomes, which is essential to determine which models should inform clinical practice. This  
18  
19 could also guide development of future models. Thus, we conducted a systematic review to  
20  
21 identify, describe, compare, and synthesize clinical prediction models designed to predict TB  
22  
23 treatment outcomes among persons with pulmonary TB.  
24  
25  
26  
27  
28  
29  
30  
31  
32  
33  
34  
35  
36  
37  
38  
39  
40  
41  
42  
43  
44  
45  
46  
47  
48  
49  
50  
51  
52  
53  
54  
55  
56  
57  
58  
59  
60

## **METHODS AND ANALYSIS**

All steps of the systematic review were carried out according to guidelines set by Cochrane Prognosis Methods Group (PMG) and PROGnosis RESearch Strategy (PROGRESS).[12–14] Reporting adhered to the Preferred Reporting Items for Systematic Reviews and Meta-Analyses (**Supplemental File 1**). This study was pre-registered on Open Science Framework (OSF) (<https://osf.io/rz3wp>) and the international prospective register of systematic reviews (PROSPERO; CRD42020155782).

### **Study eligibility criteria**

The review question was defined according to the PICOTS (Population, Intervention, Comaparator, Outcomes, Timing, Setting) framework (**Supplemental File 2**). In brief, the goal was to identify prognostic models developed to predict TB treatment outcomes among pulmonary TB cases. The main outcome was unsuccessful TB treatment outcome, defined by the WHO as the combination of death, treatment failure, loss to follow-up, and/or not evaluated, as compared to successful TB treatment outcome, defined as the combination of cure or treatment completion (**Table 1**) [15]. Loss to follow-up was sometimes referred to as default or treatment abandonment.

Inclusion criteria were: 1) prognostic model studies with or without external validation[16]; 2) study population included adult, drug-susceptible, pulmonary, TB cases; 3) written in English, Spanish, Portuguese, and French; 4) published between January 1, 1995 and January 9, 2020; 5) treatment outcome was one of the following: cure, treatment completion, death, treatment failure, loss to follow-up, or not evaluated.

Exclusion criteria were: 1) predictive value of more than one variable was evaluated but not combined in a prediction model; 2) study population was only multi-drug resistant (MDR) TB cases, only extrapulmonary TB cases, or only children (< 18 years-old); 3) outcome was

1  
2  
3 evaluated during treatment such as: two-month smear/culture conversion, acquired resistance,  
4  
5 adverse events, quality of life; 4) long-term outcomes, such as relapse, recurrence, or post-  
6  
7 treatment mortality.  
8  
9

10 The decision to include only articles in English, Spanish, Portuguese, and French was  
11  
12 based on study team capabilities. The dates reflect modern TB treatment practice; first-line TB  
13  
14 treatment regimens were not available until the early 1990s.[17,18] Articles that included a  
15  
16 combination of drug-susceptible and drug-resistant cases, or a combination of children and adults  
17  
18 were included.  
19  
20

### 21 **Search strategy and selection criteria**

22 The following electronic databases were searched on January 9, 2020: PubMed, Embase,  
23  
24 Web of Science, and the first 200 references from Google Scholar. This combination of  
25  
26 databases achieved best overall recall for systematic reviews in a recent study.[19]  
27  
28 Clinicaltrials.gov and retractiondatabase.org were also searched for unpublished research.  
29  
30 Reference lists of retrieved articles were checked to identify eligible studies.  
31  
32  
33

34 Search terms relating to the “prediction model” component of the search were adapted  
35  
36 from a PubMed search strategy that captured prediction model studies with sensitivity of  
37  
38 98%.[20] That component was combined with terms relating to TB treatment outcomes. The  
39  
40 search strategy, developed in PubMed, was adapted for all other databases with assistance from a  
41  
42 reference librarian (**Supplemental File 3**).  
43  
44  
45

46 Article selection was conducted in three stages. The first stage was automatic de-  
47  
48 duplication and title screening, carried out using *revtools* in RStudio (version 1.2).[21]  
49  
50 Remaining articles were imported into Covidence, a web-based software platform that  
51  
52 streamlines systematic reviews, where abstracts (Stage 2) and full text (Stage 3) were manually  
53  
54 screened.[22] Stages 2 and 3 were carried out by two independent reviewers (LSP and FMR).  
55  
56  
57  
58  
59

1  
2  
3 Discordance was discussed between reviewers, and if consensus was not reached, a third party  
4 arbitrated (one of TRS, VCR, PFR, DL). In stage 3, reasons for exclusion were documented  
5  
6 according to Preferred Reporting Items for Systematic Reviews and Meta-Analyses (PRISMA).  
7  
8  
9

## 10 **Data analysis**

11  
12 Data from selected studies were recorded using a database designed in REDCap  
13  
14 (Vanderbilt University).[23,24] Data extraction was informed by the CHecklist for critical  
15  
16 Appraisal and data extraction for systematic Reviews of prediction Modelling Studies  
17  
18 (CHARMS) and the Prediction Model Risk of Bias Assessment Tool (PROBAST).[16,25,26]  
19  
20 CHARMS checklist and PROBAST are in **Supplemental Files 4 and 5**, respectively.  
21  
22

23  
24 Quality assessment and applicability of included studies was assessed using PROBAST  
25  
26 by dual independent review.[16,26] PROBAST was specifically designed to assess risk of bias of  
27  
28 prediction model studies, which included identifying deficiencies in study design, conduct, or  
29  
30 analysis that led to inaccurate estimates of predictive performance. PROBAST has 4 domains:  
31  
32 participants, predictors, outcome, and analysis with 20 total signaling questions. Each question  
33  
34 was answered on the scale: yes, probably yes, no, probably no, no information. Domains were  
35  
36 scored as low, high, and unclear risk of bias. PROBAST also guides assessment of applicability  
37  
38 of participants, predictors, and outcomes from each included study to the review question.  
39  
40  
41

42  
43 Results were summarized narratively and in tables and figures. Meta-analysis was not  
44  
45 possible due to lack of external validation and use of disparate predictors, outcome definitions,  
46  
47 and modeling methods. For studies that presented multiple models with the same set of  
48  
49 predictors and outcomes, but different methods, the best-performing method was included in data  
50  
51 synthesis. For studies presenting multiple models with different sets of predictors (i.e. baseline  
52  
53 data vs. longitudinal data), the model developed using only baseline data was included. If studies  
54  
55  
56  
57  
58  
59  
60



1  
2  
3 developed multiple models for different outcomes or with different populations, all models were  
4  
5 included.  
6

### 7 **Patient and public involvement**

8  
9  
10 Neither patients nor the public were involved in the design, conduct, or reporting of the  
11  
12 research, as it was not feasible or appropriate for this systematic review. The study protocol is  
13  
14 publicly available at <https://osf.io/rz3wp>.  
15

### 16 **Role of the funding source**

17  
18  
19 The funder of the study had no role in study design, data collection, data analysis, data  
20  
21 interpretation, or writing of the report. The corresponding author had full access to all the data in  
22  
23 the study and had final responsibility for the decision to submit for publication.  
24  
25  
26  
27  
28  
29  
30  
31  
32  
33  
34  
35  
36  
37  
38  
39  
40  
41  
42  
43  
44  
45  
46  
47  
48  
49  
50  
51  
52  
53  
54  
55  
56  
57  
58  
59  
60

## **RESULTS**

### **Study selection**

The search identified 14,739 unique studies. After excluding irrelevant titles, 6,426 abstracts were screened, 536 articles underwent full-text review, and 33 model development studies presenting 37 prediction models were included (**Figure 1**).

### **Study characteristics**

Of the 33 studies, most were retrospective cohorts (n=25, 76%), three (9%) were prospective cohort studies, two (6%) were case-control studies, and three (9%) were nested case-control studies. Data from nearly half of studies (n=16, 48%) were collected from surveillance systems; eleven (33%) studies used a data collection form developed specifically for their study and six studies (18%) extracted data from medical records. Median sample size was 803 (interquartile range (IQR): 291-4167). Full details on included studies are in **Table 2**.

Thirteen studies (41%) took place in Asia, eight (25%) in Africa, six (19%) in Europe, four (12%) in North America, and one (3%) included sites in Europe and Argentina. Fewer than half (n=14, 45%) of the studies took place in high-burden TB settings.<sup>1</sup> One study did not report study location. (**Tables 2 and 3**).

Reporting of population characteristics varied by study (**Table 4**). Among 18 studies that reported a measure of central tendency (mean or median) for age, the median of those measures of central tendency was 41 years (IQR: 37-49). Of 17 studies that reported the minimum age of participants, seven (41%) had a minimum age of 15, one (6%) had a minimum age of 16, one (6%) had a minimum age of 17, and the remainder had minimum age of 18. Eighteen studies reported including persons living with HIV (PLWH); 5 of these included only TB/HIV patients. Twelve studies reported including persons with diabetes; one of which includes only TB/DM.

1  
2  
3 Eight studies reported including some participants with MDR, though prevalence of MDR was  
4 low in all studies. Ten studies included only hospitalized patients, and in 14 studies, all  
5  
6 participants were on directly observed therapy (DOT).  
7  
8

### 9 10 **Model characteristics**

11  
12 Model outcomes included death (n=16, 43%), treatment failure (n=6, 16%), default (n=6,  
13 16%) or a composite outcome (n=8, 23%) (**Tables 2 and 5**). The complete outcome definition  
14  
15 for all included studies is in **Supplemental File 6**.  
16  
17

18  
19 Most models were developed using clinical/epidemiologic predictors (n=34, 92%), two  
20 (6%) used multiple biomarkers, and one (3%) used adherence data. The most common candidate  
21  
22 predictors were age, sex, extrapulmonary TB, smear result, BMI, x-ray findings, and previous  
23  
24 TB. The most common predictors retained in the final models were age, sex, extrapulmonary TB,  
25  
26 BMI, chest x-ray results, previous TB, and HIV (**Figure 2**).  
27  
28

29  
30 Only three models (8%) used survival analysis; most models used logistic regression  
31 (n=29, 78%) and five (14%) used a machine learning approach. More than half of studies (n=19,  
32  
33 51%) considered variables for inclusion in the multivariable model based on unadjusted  
34  
35 associations with the outcome. Model building methods varied widely between models (**Table**  
36  
37 **5**).  
38  
39

40  
41 Only 19 (51%) models were internally validated, including ten (53%) split-sample  
42  
43 validation, five (26%) bootstrap resampling, and four (21%) cross-validation. Six (16%) models  
44  
45 were externally validated.  
46  
47

48  
49 Many models (n=30, 81%) reported discrimination with c-statistic (concordance statistic)  
50  
51 or area under the receiver operating characteristic (AUROC), which are equivalent and quantify  
52  
53 the ability of the model to distinguish between patients who do and do not develop an outcome.  
54  
55  
56  
57  
58  
59

1  
2  
3 Only 17 (46%) reported calibration, the agreement between observed and predicted outcomes.  
4  
5 Most studies assessed calibration with Hosmer-Lemeshow tests (n=13, 77%); only two studies  
6  
7 provided a calibration plot, the preferred reporting method for prediction model  
8  
9 studies,[16,27,28] and one reported the calibration slope (**Table 2**). Models were presented a  
10  
11 variety of ways, the most common of which was a weighted risk score (n=16, 43%); details on  
12  
13 model presentation are in **Supplemental File 7**.  
14  
15

### 16 17 **Quality assessment**

18  
19 Grading of PROBAST signaling questions is summarized in **Figure 3**, and the summary  
20  
21 risk of bias for the participants, predictors, outcome, and analysis domains and assessment of  
22  
23 applicability are shown in **Figure 4**. More than half of the studies were at low risk of bias for the  
24  
25 population and outcomes domains, but all studies were at high risk of bias in the analysis  
26  
27 domain.  
28  
29

30  
31 Common sources of population bias included use of non-nested case-control  
32  
33 design[29,30], nested case-control design without proper estimation of baseline risk,[31,32] or  
34  
35 inappropriate inclusion/exclusion criteria.[33,34] Sources of predictor bias included lack of  
36  
37 standardized assessment of key predictors (i.e. HIV, diabetes, chest x-ray scoring)[9,29,31,34–  
38  
39 36] or timing of data collection/availability that would limit the intended use of the  
40  
41 model.[9,29,37] Within the outcomes domain, sources of bias included subjective[35] or non-  
42  
43 standard[32,38] outcome measures and inconsistent outcome ascertainment.[29]  
44  
45

46  
47 Bias in the analysis domain was widespread. More than half of the models included were  
48  
49 likely overfit due to low events per variable (EPV) ratios (**Table 5**). Only 6 studies handled  
50  
51 continuous and categorical variables appropriately (i.e., didn't dichotomize continuous variables,  
52  
53 considered non-linearity of continuous variables).[31,39–43] Most studies used complete case-  
54  
55  
56  
57  
58  
59  
60

1  
2  
3 analysis or did not mention missing data; no study used multiple imputation in their main  
4  
5 analysis. One study with low amounts of missing data (<5%) conducted sensitivity analysis with  
6  
7 multiple imputation.[44] A different study excluded only two people out of a total sample size of  
8  
9 1007 with missing data, which would have little impact on model performance.[45] Fewer than  
10  
11 half (n=14) of studies avoided univariable predictor selection, and only three studies used  
12  
13 survival analysis, appropriately accounting for censoring.[36,45,46] Performance measures were  
14  
15 appropriately reported (i.e. calibration assessed with plot and discrimination assessed with c-  
16  
17 statistic/AUROC) in three studies.[41,44,47] Only two studies estimated optimism (degree to  
18  
19 which data are overfit) or accounted for potential overfitting with penalization of model  
20  
21 parameters.[35,41] Ten studies appropriately presented their model with model coefficients or  
22  
23 nomograms, which prevents bias from rounding or transforming model coefficients to generate a  
24  
25 risk score.[30,33,35,37,38,45,47–55]

26  
27  
28  
29  
30  
31 About half of the models (n=19, 51%) were applicable to the review question in all  
32  
33 domains. However, unclear reporting of target population or predictor and outcome definitions  
34  
35 limited assessment of applicability for several studies.[38,49,50,56,57] Additionally, studies that  
36  
37 included only hospitalized patients with specific laboratory parameters may not be routinely  
38  
39 available in the clinical setting.[39,40,42]

## **DISCUSSION**

In this comprehensive, systematic review of prediction models for pulmonary TB treatment outcomes, we identified 33 model development studies presenting 37 prediction models. Although diagnostic prediction models for prevalent TB were previously systematically reviewed, this is the first systematic review of TB treatment outcomes.[58] The included prediction models were developed for predicting death, treatment failure, default, or a composite unfavorable outcome during TB treatment. Most models reported good performance (c-statistic/AUROC>0.7), but all were evaluated to have high risk of bias due to poor reporting, exclusion of missing data, weak methodologic approaches, lack of calibration assessment, and limited validation. Predictor and outcome definitions varied by study and limited comparisons between models.

More than half of the models included in the review were developed in low burden TB settings, and none were developed specifically in South America. Prediction of TB treatment outcome is especially important in high burden TB settings, where resources may be limited, and risk assessment can guide resource allocation toward patients who need the most involved care protocols.

Common risk factors included in the models were consistent with well-established risk factors for poor TB treatment outcomes, including age, sex, HIV, extrapulmonary TB, baseline smear results, and previous TB treatment. Among studies that included PLWH, only three considered factors related to management/severity of HIV, such as receipt of antiretroviral therapy, CD4 cell count, or viral load, which likely impact TB treatment outcomes.[40,46,51] Laboratory values or metabolic biomarkers, such as hemoglobin, hemoglobin A1c or random blood glucose, may also be associated with treatment outcome and worth considering as candidate predictors. There is increasing evidence that diabetes impacts TB treatment outcomes,

1  
2  
3 but caution is warranted about how to best define diabetes in the context of a prediction model to  
4 ensure consistency and reproducibility across studies.[59] Behavioral characteristics, such as  
5 tobacco use, alcohol use, and drug use were rarely included in final prediction models and are  
6 difficult to collect objectively, suggesting their role in prediction models for TB treatment  
7 outcomes may be limited.  
8  
9

10  
11  
12  
13  
14 Additionally, several studies excluded participants with HIV, diabetes, extrapulmonary  
15 TB, or MDR TB, because these factors negatively influence treatment outcomes. However,  
16 careful consideration should be given to inclusion/exclusion criteria in prediction model studies.  
17 Information necessary to carry out inclusion/exclusions should be available at the of intended use  
18 of the model, which may not always hold for these aforementioned factors.[60] This point is  
19 especially questionable for MDR, given that conventional drug-susceptibility testing results are  
20 not available for several weeks after TB diagnosis; though more recent advances in rapid  
21 molecular methods such as GeneXpert or line-probe assays offer rapid screening for drug  
22 resistance.[61]  
23  
24  
25  
26  
27  
28  
29  
30  
31  
32  
33  
34

35 TB researchers should thoughtfully consider how to appropriately handle complexities of  
36 censoring and competing risks in TB outcomes research. Only three studies in this review used  
37 survival analysis, despite the long duration of TB treatment outcome assessment and relatively  
38 high rates of losses to follow-up across studies. Losses to follow-up were frequently excluded,  
39 which can lead to selection bias. Additionally, all studies that included death as the outcome  
40 considered all-cause mortality. Also, for studies that predict losses to follow-up/default, death  
41 (even due to TB) is a competing risk. Competing risk analyses are common in cardiovascular  
42 research, research in elderly populations, and there are specific recommendations for competing  
43 risk methods in prognostic research.[62,63]  
44  
45  
46  
47  
48  
49  
50  
51  
52  
53  
54  
55  
56  
57  
58  
59  
60

1  
2  
3  
4  
5  
6  
7  
8  
9  
10  
11  
12  
13  
14  
15  
16  
17  
18  
19  
20  
21  
22  
23  
24  
25  
26  
27  
28  
29  
30  
31  
32  
33  
34  
35  
36  
37  
38  
39  
40  
41  
42  
43  
44  
45  
46  
47  
48  
49  
50  
51  
52  
53  
54  
55  
56  
57  
58  
59  
60

Though all included studies were at high risk of bias in the analysis domain, we want to highlight two studies with some exemplary characteristics.[41,44] Pefura-Yone et al.[41] provide clear explanations of study design, inclusion/exclusion criteria, and data collection procedures; TB diagnosis and treatment outcome definitions were standard.[64] Non-linearity of continuous variables was considered with restricted cubic splines, and no continuous variables were categorized or dichotomized; the final model includes four predictors that are easy to collect and routinely assessed in most TB control programs, especially those in high burden settings. The performance of the model was internally validated with bootstrap validation, and the discrimination (c-statistic=0.808) was corrected for optimism. Model calibration was presented graphically with calibration plots. The final model was presented as a nomogram with instructions for use, which facilitates use in external validation studies. Gupta-Wright and colleagues developed and externally validated a clinical risk score to predict mortality in high-burden, low-resource settings.<sup>43</sup> They used clinical trial data with very low amounts of missing data for model development, and externally validated the clinical risk score with data collected independently from two other studies (a clinical trial and a prospective cohort). Given high amounts (42%) of missing data in the validation cohort, they conducted sensitivity analysis using multiple imputation for missing data; the c-statistic differed slightly between complete case and multiple-imputation analyses in the validation cohort (0.68 vs. 0.64). Candidate predictors were based on *a priori* clinical knowledge, previous literature, and required variables were objective, reproducible, and available in low-resource settings, consistent with recommended approaches.[26,60,65] Additionally, they reported model performance with the c-statistics and calibration plots for development and validation cohorts, and reported results according to TRIPOD (transparent reporting of a multivariable prediction model for individual prognosis or



1  
2  
3 diagnosis) guidance.[27,28] Regardless, each of these models requires external validation prior  
4  
5 to use in clinical practice.  
6

7  
8       There are several limitations of this study. First, data extraction was subject to reporting  
9  
10 the primary study, which varied widely across studies. Most studies reported discrimination, and  
11  
12 several reported sensitivity and specificity; TRIPOD recommends all studies report, at minimum,  
13  
14 calibration with a calibration plot and discrimination with c-statistic.[28] Measures of sensitivity  
15  
16 and specificity require dichotomization of risks, which then only pertain to a specific risk  
17  
18 stratum, rather than quantifying the overall model performance.[14,65] We did not include  
19  
20 external validation studies, which is an essential step for translation to clinical practice.  
21  
22 However, several studies in the review did not include the full model equation, which inhibits  
23  
24 their ability to be externally validated. Upon searching for studies that externally validated  
25  
26 prediction models in this review, we found three studies[66–68] that evaluated the same model  
27  
28 (TBscore).[36] Briefly, these studies evaluated the ability of TBscore to monitor treatment  
29  
30 response in a new setting[66], refined the instrument (TBscoreII) using exploratory factor  
31  
32 analysis[67], and then evaluated TBscoreII for use in patients with TB/HIV.[68] To our  
33  
34 knowledge, no other studies included in the review were externally validated by other sources.  
35  
36 Finally, we excluded 10 studies that were not available in English, Spanish, Portuguese, or  
37  
38 French; all abstracts were available in English, and none reported model performance metrics, so  
39  
40 they likely would have been excluded for different reasons regardless.  
41  
42  
43  
44  
45  
46

47       The findings of this review not only serve as a comprehensive overview of existing TB  
48  
49 outcome prediction models but can act as a resource for future model development and  
50  
51 validation of prediction models for TB treatment outcomes. We encourage researchers to focus  
52  
53 future TB outcome prediction models on easily collected and readily available predictors that are  
54  
55  
56  
57  
58  
59

1  
2  
3 widely generalizable. We highlight age, sex, extrapulmonary TB, BMI, chest x-ray results,  
4  
5 previous TB, and HIV as common predictors of TB treatment outcomes. Additionally, when  
6  
7 building a new prediction model, it is recommended to first prune the set of considered  
8  
9 predictors based on expert opinion and previous literature, rather than univariable analysis or  
10  
11 variable selection processes[26,60,65] Future model development or validation studies should  
12  
13 adhere to the TRIPOD guidelines, which provide a 22-item checklist and aims to improve the  
14  
15 reporting of prediction model development studies.[27,28] We also encourage researchers  
16  
17 consider the PROBAST criteria when developing their model to limit sources of bias in design  
18  
19 and conduct of prediction model studies.  
20  
21  
22  
23

24 Prediction models are an important tool in TB management, as they can lay the  
25  
26 foundation for future intervention studies or clinical decision making by providing risk  
27  
28 prediction that can aid in targeted treatment, resource allocation, or intensive case management  
29  
30 at patients who are least likely to achieve cure and most likely to benefit from some form of  
31  
32 intervention, especially in high-burden and low-resources areas. Use of prediction models can  
33  
34 potentially help guide tuberculosis treatment practices to achieve the End TB Strategy target of  
35  
36 >90% treatment success, but methodologic rigor and detailed reporting must be improved.  
37  
38 Though our findings suggest that none of the existing models are ready for clinical application  
39  
40 without extensive external validation, we hope they direct future researchers to make use of  
41  
42 guidelines for development and reporting of prediction models.  
43  
44  
45  
46  
47  
48  
49  
50  
51  
52  
53  
54  
55  
56  
57  
58  
59  
60

## **FOOTNOTES**

**Ethics approval:** Not required.

**Transparency statement:** The lead author affirms that the manuscript is an honest, accurate, and transparent account of the study being reported. No important aspects of the study have been omitted, and any discrepancies from the study as planned were explained.

**Contributorship:** LSP conceptualized the research question, designed the protocol, and drafted the manuscript. LSP and FMR screened studies. FMR, PFR, DL, VCR and TRS provided feedback on the research design, original protocol, and revised successive drafts of the manuscript. All authors approved the final version of the manuscript.

**Funding:** This work was supported by the National Center for Advancing Translational Sciences [CTSA Award No. TL1TR000447 to L.S.P.] and the National Institutes of Allergy and Infectious Diseases [F31AI152614-01A1 to L.S.P.]. Its contents are solely the responsibility of the authors and do not necessarily represent the official views the National Center for Advancing Translational Sciences or the National Institutes of Health.

**Competing interests:** None declared.

**Data sharing:** The study protocol is available online at <https://osf.io/rz3wp>. Most included studies are publicly available. Additional data and code are available upon request.

**Exclusive license:** This is an Open Access article distributed in accordance with the terms of the Creative Commons Attribution (CC BY 4.0) license, which permits others to distribute, remix, adapt and build upon this work, for commercial use, provided the original work is properly cited.

See: <http://creativecommons.org/licenses/by/4.0/>.

## REFERENCES

- 1 Global Tuberculosis Report 2019. Geneva: World Health Organization 2019. Licence: CC BY-NC-SA 3.0 IGO.
- 2 *The END TB Strategy*. Geneva: World Health Organization 2015.
- 3 Kerantzas CA, Jacobs WR. Origins of Combination Therapy for Tuberculosis: Lessons for Future Antimicrobial Development and Application. *mBio* 2017;**8**:e01586-16. doi:10.1128/MBIO.01586-16
- 4 Nahid P, Dorman SE, Alipanah N, *et al*. Official American Thoracic Society/Centers for Disease Control and Prevention/Infectious Diseases Society of America Clinical Practice Guidelines: Treatment of Drug-Susceptible Tuberculosis. *Clinical Infectious Diseases* 2016;**63**:e147–95. doi:10.1093/cid/ciw376
- 5 Guidelines for treatment of drug-susceptible tuberculosis and patient care, 2017 update. Geneva: : World Health Organization 2017. Licence: CC BY-NC-SA 3.0 IGO. doi:WHO/HTM/TB/2017.05
- 6 WHO consolidated guidelines on drug-resistant tuberculosis treatment. Geneva: World Health Organization 2019. Licence: CC BY-NC-SA 3.0 IGO.
- 7 Vasankari T, Holmström P, Ollgren J, *et al*. Risk factors for poor tuberculosis treatment outcome in Finland: A cohort study. *BMC Public Health* 2007;**7**:1–9. doi:10.1186/1471-2458-7-291
- 8 Ramachandran G, Agibothu K. Factors Influencing Tuberculosis Treatment Outcome in Adult Patients Treated with Thrice-Weekly Regimens. 2017;**61**:1–12.
- 9 Abdelbary BE, Garcia-Viveros M, Ramirez-Oropesa H, *et al*. Predicting treatment failure, death and drug resistance using a computed risk score among newly diagnosed TB patients in Tamaulipas, Mexico. *Epidemiology and Infection* 2017;**145**:3020–34. doi:10.1017/S0950268817001911
- 10 Torres NMC, Rodríguez JJQ, Andrade PSP, *et al*. Factors predictive of the success of tuberculosis treatment: A systematic review with meta-analysis. *PLoS ONE* 2019;**14**:1–24. doi:10.1371/journal.pone.0226507
- 11 Steyerberg EW, Moons KGM, van der Windt DA, *et al*. Prognosis Research Strategy (PROGRESS) 3: Prognostic Model Research. *PLoS Medicine* 2013;**10**:e1001381. doi:10.1371/journal.pmed.1001381
- 12 Riley R, Ridley G, Williams K, *et al*. Prognosis research: towards evidence-based results and a Cochrane methods group. 2014;**60**:863–5.
- 13 Moons KG, Hooft L, Williams K, *et al*. Implementing systematic reviews of prognosis studies in Cochrane. *The Cochrane database of systematic reviews* 2018;**10**:ED000129. doi:10.1002/14651858.ED000129

- 14 Debray TPA, Damen JAAG, Snell KIE, *et al.* A guide to systematic review and meta-analysis of prediction model performance. *BMJ (Online)* 2017;**356**. doi:10.1136/bmj.i6460
- 15 Definitions and reporting framework for tuberculosis - 2013 revision. In: *Annex 2, TB case and treatment outcome definitions*. Geneva: World Health Organization 2014.
- 16 Wolff RF, Moons KGM, Riley RD, *et al.* PROBAST: A tool to assess the risk of bias and applicability of prediction model studies. *Annals of Internal Medicine* 2019;**170**:51–8. doi:10.7326/M18-1376
- 17 Iseman MD. Tuberculosis therapy: past, present and future. *Eur Resp J* 2002;**20**:87s–94s. doi:10.1183/09031936.02.00309102
- 18 Council STSMR. Clinical trial of six-month and four-month regimens of chemotherapy in the treatment of pulmonary tuberculosis: the results up to 30 months. *Tubercle* 1981;:95–102.
- 19 Bramer WM, Rethlefsen ML, Kleijnen J, *et al.* Optimal database combinations for literature searches in systematic reviews: A prospective exploratory study. *Systematic Reviews* 2017;**6**:1–12. doi:10.1186/s13643-017-0644-y
- 20 Geersing GJ, Bouwmeester W, Zuithoff P, *et al.* Search filters for finding prognostic and diagnostic prediction studies in medline to enhance systematic reviews. *PLoS ONE* 2012;**7**:3–8. doi:10.1371/journal.pone.0032844
- 21 Westgate MJ. revtools: An R package to support article screening for evidence synthesis. *Research Synthesis Methods* 2019;**10**:606–14. doi:10.1002/jrsm.1374
- 22 Veritas Health Innovation, Melbourne A. Covidence systematic review software. Covidence. 2016. doi:10.1016/j.carbon.2012.08.062
- 23 Harris PA, Taylor R, Minor BL, *et al.* The REDCap consortium: Building an international community of software platform partners. *Journal of Biomedical Informatics* 2019;**95**:103208. doi:10.1016/j.jbi.2019.103208
- 24 Harris PA, Taylor R, Thielke R, *et al.* Research electronic data capture (REDCap)-A metadata-driven methodology and workflow process for providing translational research informatics support. *Journal of Biomedical Informatics* 2009;**42**:377–81. doi:10.1016/j.jbi.2008.08.010
- 25 Moons KGM, de Groot JAH, Bouwmeester W, *et al.* Critical Appraisal and Data Extraction for Systematic Reviews of Prediction Modelling Studies: The CHARMS Checklist. *PLoS Medicine* 2014;**11**. doi:10.1371/journal.pmed.1001744
- 26 Moons KGM, Wolff RF, Riley RD, *et al.* PROBAST: A tool to assess risk of bias and applicability of prediction model studies: Explanation and elaboration. *Annals of Internal Medicine* 2019;**170**:W1–33. doi:10.7326/M18-1377

- 1  
2  
3 27 Moons KGM, Altman DG, Reitsma JB, *et al.* Transparent reporting of a multivariable  
4 prediction model for individual prognosis or diagnosis (TRIPOD): Explanation and  
5 elaboration. *Annals of Internal Medicine* 2015;**162**:W1–73. doi:10.7326/M14-0698  
6  
7  
8 28 Collins GS, Reitsma JB, Altman DG, *et al.* Transparent Reporting of a multivariable  
9 prediction model for Individual Prognosis Or Diagnosis (TRIPOD): The TRIPOD Statement.  
10 2015;**162**. doi:10.7326/M14-0697  
11  
12 29 Cherkaoui I, Sabouni R, Ghali I, *et al.* Treatment default amongst patients with tuberculosis  
13 in urban Morocco: Predicting and explaining default and post-default sputum smear and drug  
14 susceptibility results. *PLoS ONE* 2014;**9**. doi:10.1371/journal.pone.0093574  
15  
16 30 Keane VP, De Klerk N, Krieng T, *et al.* Risk factors for the development of non-response to  
17 first-line treatment for tuberculosis in Southern Vietnam. *International Journal of*  
18 *Epidemiology* 1997;**26**:1115–20. doi:10.1093/ije/26.5.1115  
19  
20  
21 31 Chang KC, Leung CC, Tam CM. Risk factors for defaulting from anti-tuberculosis treatment  
22 under directly observed treatment in Hong Kong. *International Journal of Tuberculosis and*  
23 *Lung Disease* 2004;**8**:1492–8.  
24  
25 32 Chee CBE, Boudville IC, Chan SP, *et al.* Patient and disease characteristics, and outcome of  
26 treatment defaulters from the Singapore TB control unit - A one-year retrospective survey.  
27 *International Journal of Tuberculosis and Lung Disease* 2000;**4**:496–503. doi:NA  
28  
29  
30 33 Luies L, Reenen M Van, Ronacher K, *et al.* Predicting tuberculosis treatment outcome using  
31 metabolomics. *Biomarkers in Medicine* 2017;**11**:1057–67. doi:10.2217/bmm-2017-0133  
32  
33 34 Killian JA, Wilder B, Sharma A, *et al.* Learning to Prescribe Interventions for Tuberculosis  
34 Patients Using Digital Adherence Data. *KNOWLEDGE DISCOVERY AND DATA MINING*  
35 2019;**NA**:2430–8. doi:10.1145/3292500.3330777  
36  
37 35 Belilovsky EM, Borisov SE, Cook EF, *et al.* Treatment interruptions among patients with  
38 tuberculosis in Russian TB hospitals. *International Journal of Infectious Diseases*  
39 2010;**14**:e698–703. doi:10.1016/j.ijid.2010.03.001  
40  
41  
42 36 Wejse C, Gustafson P, Nielsen J, *et al.* TBscore: Signs and symptoms from tuberculosis  
43 patients in a low-resource setting have predictive value and may be used to assess clinical  
44 course. *Scandinavian Journal of Infectious Diseases* 2008;**40**:111–20.  
45 doi:10.1080/00365540701558698  
46  
47  
48 37 Nguyen DT, Graviss EA. Development and validation of a risk score to predict mortality  
49 during TB treatment in patients with TB-diabetes comorbidity. *BMC Infectious Diseases*  
50 2019;**19**:10. doi:10.1186/s12879-018-3632-5  
51  
52 38 Kalhori SRN, Zeng X. Fuzzy Logic Approach to Predict the Outcome of Tuberculosis  
53 Treatment Course Destination. *Lecture Notes in Engineering and Computer Science*  
54 2009;**2179**:774–8.  
55  
56  
57  
58  
59  
60



- 1  
2  
3 39 Horita N, Miyazawa N, Yoshiyama T, *et al.* Poor performance status is a strong predictor for  
4 death in patients with smear-positive pulmonary TB admitted to two Japanese hospitals.  
5 *Transactions of the Royal Society of Tropical Medicine and Hygiene* 2013;**107**:451–6.  
6 doi:10.1093/trstmh/trt037  
7  
8  
9 40 Koegelenberg CFN, Balkema CA, Jooste Y, *et al.* Validation of a severity-of-illness score in  
10 patients with tuberculosis requiring intensive care unit admission. *South African Medical*  
11 *Journal* 2015;**105**:389–92. doi:10.7196/SAMJ.9148  
12  
13 41 Pefura-Yone EW, Kuaban C, Assamba-Mpom SA, *et al.* Derivation, validation and  
14 comparative performance of a simplified chest X-ray score for assessing the severity and  
15 outcome of pulmonary tuberculosis. *Clinical Respiratory Journal* 2015;**9**:157–64.  
16 doi:10.1111/crj.12112  
17  
18 42 Valade S, Raskine L, Aout M, *et al.* Tuberculosis in the intensive care unit: A retrospective  
19 descriptive cohort study with determination of a predictive fatality score. *Canadian Journal*  
20 *of Infectious Diseases and Medical Microbiology* 2012;**23**:173–8. doi:10.1155/2012/361292  
21  
22 43 Wang Q, Han W, Niu J, *et al.* Prognostic value of serum macrophage migration inhibitory  
23 factor levels in pulmonary tuberculosis. *Respiratory Research* 2019;**20**:50.  
24 doi:10.1186/s12931-019-1004-3  
25  
26 44 Gupta-Wright A, Corbett EL, Wilson D, *et al.* Risk score for predicting mortality including  
27 urine lipoarabinomannan detection in hospital inpatients with HIV-associated tuberculosis in  
28 sub-Saharan Africa: Derivation and external validation cohort study. *PLoS Medicine*  
29 2019;**16**:1–20. doi:10.1371/journal.pmed.1002776  
30  
31 45 Zhang Z, Xu L, Pang X, *et al.* A Clinical scoring model to predict mortality in HIV/TB co-  
32 infected patients at end stage of AIDS in China: An observational cohort study. *BioScience*  
33 *Trends* 2019;**13**:136–44. doi:10.5582/bst.2018.01309  
34  
35 46 Podlekareva DN, Grint D, Post FA, *et al.* Health care index score and risk of death following  
36 tuberculosis diagnosis in HIV-positive patients. *International Journal of Tuberculosis and*  
37 *Lung Disease* 2013;**17**:198-206+i. doi:10.5588/ijtld.12.0224  
38  
39 47 Baussano I, Pivetta E, Vizzini L, *et al.* Predicting tuberculosis treatment outcome in a low-  
40 incidence area. *International Journal of Tuberculosis and Lung Disease* 2008;**12**:1441–8.  
41  
42 48 Costa-Veiga A, Briz T, Nunes C. Unsuccessful treatment in pulmonary tuberculosis: Factors  
43 and a consequent predictive model. *European Journal of Public Health* 2018;**28**:252–8.  
44 doi:10.1093/eurpub/ckx136  
45  
46 49 Niakan Kalhori SR, Nasehi M, Zeng XJ. A logistic regression model to predict high risk  
47 patients to fail in tuberculosis treatment course completion. *IAENG International Journal of*  
48 *Applied Mathematics* 2010;**40**:1–6.  
49  
50 50 Kalhori SRN, Zeng X-J. PREDICTING THE OUTCOME OF TUBERCULOSIS  
51 TREATMENT COURSE IN FRAME OF DOTS - From Demographic Data to Logistic  
52  
53  
54  
55  
56  
57  
58  
59

- 1  
2  
3 Regression Model. In: *Proceedings of the International Conference on Health Informatics*.  
4 SciTePress - Science and Technology Publications 2009. 129–34.  
5 doi:10.5220/0001431401290134  
6
- 7  
8 51 Madan C, Chopra KK, Satyanarayana S, *et al*. Developing a model to predict unfavourable  
9 treatment outcomes in patients with tuberculosis and human immunodeficiency virus co-  
10 infection in Delhi, India. *PLoS ONE* 2018;**13**:e0204982. doi:10.1371/journal.pone.0204982  
11
- 12  
13 52 Nguyen DT, Jenkins HE, Graviss EA. Prognostic score to predict mortality during TB  
14 treatment in TB / HIV co-infected patients. *PLoS ONE* 2018;**13**:1–12.  
15 doi:10.1371/journal.pone.0196022  
16
- 17  
18 53 Nguyen DT, Graviss EA. Development and validation of a prognostic score to predict  
19 tuberculosis mortality. *Journal of Infection* 2018;**77**:283–90. doi:10.1016/j.jinf.2018.02.009  
20
- 21  
22 54 Pefura-Yone EW, Balkissou AD, Poka-Mayap V, *et al*. Development and validation of a  
23 prognostic score during tuberculosis treatment. *BMC Infectious Diseases* 2017;**17**:1–9.  
24 doi:10.1186/s12879-017-2309-9  
25
- 26  
27 55 Rodrigo T, Caylà JA, Casals M, *et al*. A predictive scoring instrument for tuberculosis lost to  
28 follow-up outcome. *Respiratory Research* 2012;**13**:1–9. doi:10.1186/1465-9921-13-75  
29
- 30  
31 56 Hussain OA, Junejo KN. Predicting treatment outcome of drug-susceptible tuberculosis  
32 patients using machine-learning models. *Informatics for Health and Social Care*  
33 2019;**44**:135–51. doi:10.1080/17538157.2018.1433676  
34
- 35  
36 57 Sauer CM, Sasson D, Paik KE, *et al*. Feature selection and prediction of treatment failure in  
37 tuberculosis. *PLoS ONE* 2018;**13**:1–14. doi:10.1371/journal.pone.0207491  
38
- 39  
40 58 Wyk SSV, Lin HH, Claassens MM. A systematic review of prediction models for prevalent  
41 pulmonary tuberculosis in adults. *Int J Tuberc Lung Dis*; **21**.  
42
- 43  
44 59 Huangfu P, Ugarte-Gil C, Golub J, *et al*. The effects of diabetes on tuberculosis treatment  
45 outcomes: an updated systematic review and meta-analysis. *The International Journal of*  
46 *Tuberculosis and Lung Disease* 2019;**23**:783–96. doi:10.5588/ijtld.18.0433  
47
- 48  
49 60 Steyerberg EW. *Clinical Prediction Models*. New York, NY: : Springer New York 2009.  
50 doi:10.1007/978-0-387-77244-8  
51
- 52  
53 61 Sharma SK, Dheda K. What is new in the WHO consolidated guidelines on drug-resistant  
54 tuberculosis treatment? *The Indian journal of medical research*. 2019;**149**:309–12.  
55 doi:10.4103/ijmr.IJMR\_579\_19  
56
- 57  
58 62 Wolbers M, Koller MT, Wittman JCM, *et al*. Prognostic models with competing risks  
59 methods and application to coronary risk prediction. *Epidemiology* 2009;**20**:555–61.  
60 doi:10.1097/EDE.0b013e3181a39056



- 1  
2  
3 63 Austin PC, Lee DS, Fine JP. Introduction to the Analysis of Survival Data in the Presence of  
4 Competing Risks. *Circulation* 2016;**133**:601–9.  
5 doi:10.1161/CIRCULATIONAHA.115.017719  
6
- 7 64 National Tuberculosis Control Program. Manual for health personnel. Yaounde: 2012.  
8
- 9 65 Royston P, Moons KGM, Altman DG, *et al.* Prognosis and prognostic research: Developing  
10 a prognostic model. *BMJ (Online)* 2009;**338**:1373–7. doi:10.1136/bmj.b604  
11  
12
- 13 66 Janols H, Abate E, Idh J, *et al.* Early treatment response evaluated by a clinical scoring  
14 system correlates with the prognosis of pulmonary tuberculosis patients in Ethiopia: A  
15 prospective follow-up study. *Scandinavian Journal of Infectious Diseases* 2012;**44**:828–34.  
16 doi:10.3109/00365548.2012.694468  
17
- 18 67 Rudolf F, Lemvik G, Abate E, *et al.* TBscore II: Refining and validating a simple clinical  
19 score for treatment monitoring of patients with pulmonary tuberculosis. *Scandinavian*  
20 *Journal of Infectious Diseases* 2013;**45**:825–36. doi:10.3109/00365548.2013.826876  
21  
22
- 23 68 Wejse C, Patsche CB, Kühle A, *et al.* Impact of HIV-1, HIV-2, and HIV-1+2 dual infection  
24 on the outcome of tuberculosis. *International journal of infectious diseases : IJID : official*  
25 *publication of the International Society for Infectious Diseases* 2015;**32**:128–34.  
26 doi:10.1016/j.ijid.2014.12.015  
27
- 28 69 Aljohaney AA. Mortality of patients hospitalized for active tuberculosis in King Abdulaziz  
29 University Hospital, Jeddah, Saudi Arabia. *Saudi Medical Journal* 2018;**39**:267–72.  
30 doi:10.15537/smj.2018.3.22280  
31  
32
- 33 70 Bastos HN, Osório NS, Castro AG, *et al.* A prediction rule to stratify mortality risk of  
34 patients with pulmonary tuberculosis. *PLoS ONE* 2016;**11**:1–14.  
35 doi:10.1371/journal.pone.0162797  
36
- 37 71 Gupta-Wright A, Corbett EL, Wilson D, *et al.* Risk score for predicting mortality including  
38 urine lipoarabinomannan detection in hospital inpatients with HIV-associated tuberculosis in  
39 sub-Saharan Africa: Derivation and external validation cohort study. *PLoS Medicine*  
40 2019;**16**:1–20. doi:10.1371/journal.pmed.1002776  
41  
42
- 43 72 Horita N, Miyazawa N, Yoshiyama T, *et al.* Development and validation of a tuberculosis  
44 prognostic score for smear-positive in-patients in Japan. *International Journal of*  
45 *Tuberculosis and Lung Disease* 2013;**17**:54–60. doi:10.5588/ijtld.12.0476  
46
- 47 73 Podlekareva DN, Grint D, Post FA, *et al.* Health care index score and risk of death following  
48 tuberculosis diagnosis in HIV-positive patients. *The International Journal of Tuberculosis*  
49 *and Lung Disease* 2013;**17**:198–206. doi:10.5588/ijtld.12.0224  
50  
51
- 52 74 Wang Q, Han W, Niu J, *et al.* Prognostic value of serum macrophage migration inhibitory  
53 factor levels in pulmonary tuberculosis. *Respiratory Research* 2019;**20**:50.  
54 doi:10.1186/s12931-019-1004-3  
55  
56  
57  
58  
59

- 1  
2  
3 75 Wejse C, Gustafson P, Nielsen J, *et al.* TBscore: Signs and symptoms from tuberculosis  
4 patients in a low-resource setting have predictive value and may be used to assess clinical  
5 course. *Scandinavian Journal of Infectious Diseases* 2008;**40**:111–20.  
6 doi:10.1080/00365540701558698  
7  
8  
9 76 Mburu JW, Kingwara L, Ester M, *et al.* Use of classification and regression tree (CART), to  
10 identify hemoglobin A1C (HbA1C) cut-off thresholds predictive of poor tuberculosis  
11 treatment outcomes and associated risk factors. *Journal of Clinical Tuberculosis and Other*  
12 *Mycobacterial Diseases* 2018;**11**:10–6. doi:10.1016/j.jctube.2018.01.002  
13  
14 77 Thompson EG, Du Y, Malherbe ST, *et al.* Host blood RNA signatures predict the outcome of  
15 tuberculosis treatment. *Tuberculosis* 2017;**107**:48–58. doi:10.1016/j.tube.2017.08.004  
16  
17 78 Chee CBE, Boudville IC, Chan SP, *et al.* Patient and disease characteristics, and outcome of  
18 treatment defaulters from the Singapore TB control unit - A one-year retrospective survey.  
19 *International Journal of Tuberculosis and Lung Disease* 2000;**4**:496–503.  
20  
21 79 Rodrigo T, Caylà JA, Casals M, *et al.* A predictive scoring instrument for tuberculosis lost to  
22 follow-up outcome. *Respiratory Research* 2012;**13**:1–9. doi:10.1186/1465-9921-13-75  
23  
24 80 Kalhori SRN, Zeng X-J. Fuzzy Logic Approach to Predict the Outcome of Tuberculosis  
25 Treatment Course Destination. In: *Lecture Notes in Engineering and Computer Science*. NA  
26 2009. 774–8. doi:NA  
27  
28  
29  
30  
31  
32  
33  
34  
35  
36  
37  
38  
39  
40  
41  
42  
43  
44  
45  
46  
47  
48  
49  
50  
51  
52  
53  
54  
55  
56  
57  
58  
59  
60

**Table 1.** World Health Organization definition of treatment outcomes for TB patients

| Outcome                      | Definition                                                                                                                                                                                                                                                          |
|------------------------------|---------------------------------------------------------------------------------------------------------------------------------------------------------------------------------------------------------------------------------------------------------------------|
| Treatment completion         | Completion of treatment without evidence of failure, but without documentation of a negative sputum smear or culture in the last month of treatment and/or on at least one previous occasion, either because tests were not done or because results are unavailable |
| Cure                         | Bacteriologic confirmation of a negative smear or culture at the end of TB treatment and on at least one previous occasion                                                                                                                                          |
| Treatment success            | Composite of cured and treatment completed                                                                                                                                                                                                                          |
| Treatment failure            | Sputum smear or culture is positive at month 5 or later during treatment                                                                                                                                                                                            |
| Death                        | TB patient who dies for any reason before starting or during the course of treatment                                                                                                                                                                                |
| Loss to follow-up            | TB patient who did not start treatment or whose treatment was interrupted for 2 consecutive months or more                                                                                                                                                          |
| Not evaluated (transfer out) | TB patient for whom no treatment outcome was assigned, which includes cases who “transferred out” to another treatment unit as well as cases for whom the treatment outcome is unknown to the reporting unit                                                        |

1  
2  
3 **Figure 1.** PRISMA (preferred reporting items for systematic reviews and meta-analyses) flow  
4 chart of inclusion process  
5

6  
7 **[See Figure 1]**  
8  
9  
10  
11  
12  
13  
14  
15  
16  
17  
18  
19  
20  
21  
22  
23  
24  
25  
26  
27  
28  
29  
30  
31  
32  
33  
34  
35  
36  
37  
38  
39  
40  
41  
42  
43  
44  
45  
46  
47  
48  
49  
50  
51  
52  
53  
54  
55  
56  
57  
58  
59  
60

For peer review only

Table 2. Study characteristics

| First author, year              | Population                               | Study years          | Study design         | Location                          | Validation              | No. with outcome / sample size (%)                      | Predictors in final model                                                                                                                                                                                                                                              | Performance measures                                                                                                          | Model presentation | Risk of bias (population, predictor, outcome, analysis) |
|---------------------------------|------------------------------------------|----------------------|----------------------|-----------------------------------|-------------------------|---------------------------------------------------------|------------------------------------------------------------------------------------------------------------------------------------------------------------------------------------------------------------------------------------------------------------------------|-------------------------------------------------------------------------------------------------------------------------------|--------------------|---------------------------------------------------------|
| Death                           |                                          |                      |                      |                                   |                         |                                                         |                                                                                                                                                                                                                                                                        |                                                                                                                               |                    |                                                         |
| Abdelbary[9] / 2017             | TB cases                                 | 2006 - 2013          | Retrospective cohort | Mexico                            | Internal (split-sample) | Development: 261/4216 (6%)<br>Validation: 260/4215 (6%) | Age (<41, 41-65, ≥65), sex, MDR, HIV, malnutrition, alcoholism, diabetes, pulmonary TB                                                                                                                                                                                 | c-statistic = 0.70<br>Sensitivity = 60%<br>Specificity = 71%                                                                  | Risk score         | Low, High, Low, High                                    |
| Abdelbary[9] / 2017 (TB-DM)     | TB-DM cases                              | 2006 - 2013          | Retrospective cohort | Mexico                            | None                    | 88/2121 (4%)                                            | Sex, malnutrition, BCG vaccinated, AFB smear (positive vs. negative)                                                                                                                                                                                                   | c-statistic = 0.68                                                                                                            | Risk score         | Unclear, High, Low, High                                |
| Aljohaney[69] / 2018            | Hospitalized TB patients                 | Dec 2011 – Dec 2016  | Retrospective cohort | Saudi Arabia                      | None                    | 41/291 (14%)                                            | Clinical model: Age, congestive heart failure<br>Clinical + lab model: * Age > 65, congestive heart failure, bilateral disease on chest xray                                                                                                                           | Clinical model: Accuracy = 86%<br>Clinical & lab model: * Accuracy = 90%                                                      | Odds ratios        | Unclear, Unclear, Unclear, High                         |
| Bastos[70] / 2016               | Inpatient and outpatient TB cases on DOT | 2007 - 2013          | Retrospective cohort | Portugal                          | External (setting)      | Development: 121/681 (18%)<br>Validation: 24/103 (23%)  | Hypoxemic respiratory failure, age (≥50 vs. <50), bilateral involvement, comorbidities (at least one of HIV, diabetes, liver at least one of: HIV, diabetes, liver failure/cirrhosis, congestive heart failure, chronic respiratory disease), hemoglobin (<12 vs. ≥12) | AUROC = 0.84 (95% CI: 0.76-0.93)<br>Sensitivity = 41.8%<br>Specificity = 92.1%                                                | Risk score         | Low, Unclear, Low, High                                 |
| Gupta-Wright[71] / 2019         | Hospitalized TB-HIV patients             | Oct 2015 – Sept 2017 | Retrospective cohort | Malawi and South Africa           | External (setting)      | Development: 94/315 (30%)<br>Validation: 147/644 (23%)  | Sex, age 55+, currently taking ART, ability to walk unaided, severe anemia, positive TB-LAM                                                                                                                                                                            | c-statistic = 0.68 (95% CI: 0.61-0.74)<br>HL test: p=0.13<br>Calibration plot                                                 | Risk score         | Low, Low, Low, High                                     |
| Horita[72] / 2013               | Hospitalized TB patients                 | Jan 2008 – Jul 2011  | Retrospective cohort | Japan                             | External (setting)      | Development: 36/179 (20%)<br>Validation: 48/244 (20%)   | Age, oxygen requirement, albumin, activities of daily living                                                                                                                                                                                                           | AUROC = 0.893<br>Sensitivity = 0.92<br>Specificity = 0.73                                                                     | Risk score         | Low, Low, Low, High                                     |
| Koegelenberg[40] / 2015         | Hospitalized TB patients                 | Jan 2012 – May 2013  | Retrospective cohort | South Africa                      | None                    | 38/83 (46%)                                             | Septic shock, HIV with CD4 < 200, creatinine > 140 (male) or >120 (female), P:F O2 ratio < 200, chest radiograph showing miliary pattern/parenchymal infiltrates, absence of TB treatment at admission                                                                 | Mean score in survivors: 2.27 (SD=1.47)<br>Mean score in non-survivors: 3.58 (SD=1.08)                                        | Risk score         | Low, Low, Low, High                                     |
| Nguyen[53] (general pop) / 2018 | TB cases                                 | Jan 2010 – Dec 2016  | Retrospective cohort | Texas                             | Internal (split-sample) | Development: 253/3378 (7%)<br>Validation: 270/3377 (8%) | Age group (15-44, 44-64, >64), US born, homeless, resident of long term care facility, chronic kidney failure, meningial TB, miliary TB, HIV positive, HIV unknown                                                                                                     | AUROC = 0.80 (95% CI: 0.77-0.82)<br>HL test: X <sup>2</sup> =6.3, p=0.613                                                     | Risk score         | Low, Unclear, Unclear, High                             |
| Nguyen[37] (TB-DM) / 2019       | TB-DM patients                           | Jan 2010 – Dec 2016  | Retrospective cohort | Texas                             | Internal (bootstrap)    | 112/1227 (9%)                                           | Age ≥65, US-born, homeless, IDU, chronic kidney failure, TB meningitis, Miliary TB, AFB positive smear, HIV positive                                                                                                                                                   | AUROC = 0.82 (95% CI: 0.78-0.87)<br>HL test: X <sup>2</sup> =4.54, p=0.81<br>Brier score=0.07                                 | Risk score         | Unclear, Unclear, Unclear, High                         |
| Nguyen[52] (TB-HIV) / 2018      | TB-HIV patients                          | Jan 2010 – Dec 2016  | Retrospective cohort | Texas                             | Internal (bootstrap)    | 57/450 (13%)                                            | Age ≥ 45, resident of LTCF, meningial TB, abnormal CXR, diagnosis confirmed by positive culture of NAA, culture not converted or unknown                                                                                                                               | AUROC = 0.79 (95% CI 0.70-0.87)<br>HL test: X <sup>2</sup> =4.25, p=0.51<br>Brier score: 0.09                                 | Risk score         | Low, High, Unclear, High                                |
| Pefura-Yone[54] / 2017          | TB patients                              | Jan 2012 – Dec 2013  | Retrospective cohort | Cameroon                          | Internal (bootstrap)    | 213/2250 (9%)                                           | Age, adjusted BMI, clinical form (PTB+, PTB-, EPTB), HIV                                                                                                                                                                                                               | C-statistic: 0.808<br>HL test: X <sup>2</sup> =6.44, p=0.60<br>Sensitivity = 80.7%<br>Specificity = 68.2%<br>Calibration plot | Model coefficients | Low, Low, Low, High                                     |
| Podlekareva[73] / 2013          | TB/HIV patients                          | Jan 2004 – Dec 2006  | Retrospective cohort | 52 cities in Europe and Argentina | None                    | 995†                                                    | DST performed, treatment with RHZ, and cART at/near TB diagnosis                                                                                                                                                                                                       | Crude RH = 0.62 (95% CI: 0.64-0.84)                                                                                           | Risk score         | Low, Unclear, Low, High                                 |
| Valade[42] / 2012               | Hospitalized TB patients                 | Mar 2000 – Jul 2009  | Retrospective cohort | France                            | Internal (bootstrap)    | 20/53 (38%)                                             | Miliary TB, catecholamine infusion, mechanical ventilation on admission                                                                                                                                                                                                | AUROC = 0.92 (95% CI: 0.85-0.98)<br>Brier score = 0.13                                                                        | Risk score         | Unclear, Low,                                           |

|    |                              |                                                                    |                     |                         |               |                                                    |                                                              |                                                                                                                                                                                                                                                                                                                                                                                                           |                                                                                                                                                       |                                           |                                          |
|----|------------------------------|--------------------------------------------------------------------|---------------------|-------------------------|---------------|----------------------------------------------------|--------------------------------------------------------------|-----------------------------------------------------------------------------------------------------------------------------------------------------------------------------------------------------------------------------------------------------------------------------------------------------------------------------------------------------------------------------------------------------------|-------------------------------------------------------------------------------------------------------------------------------------------------------|-------------------------------------------|------------------------------------------|
| 1  |                              |                                                                    |                     |                         |               |                                                    |                                                              | Optimism = 0.03<br>Accuracy = 85%<br>Sensitivity - 75%<br>Specificity = 91%                                                                                                                                                                                                                                                                                                                               |                                                                                                                                                       | Low,<br>High                              |                                          |
| 2  |                              |                                                                    |                     |                         |               |                                                    |                                                              |                                                                                                                                                                                                                                                                                                                                                                                                           |                                                                                                                                                       |                                           |                                          |
| 3  | Wang[74] / 2019              | HIV-negative, culture-confirmed, pulmonary TB cases                | Jan 2014 – Dec 2016 | Prospective cohort      | China         | External (setting)                                 | Development: 36/287 (13%)<br>Validation: 15/104 (14%)        | Age, cavitory lesion, pleural effusion, drug resistance, disseminated, albumin, c-reactive protein, white blood cell count, IL-6, MIF                                                                                                                                                                                                                                                                     | AUROC = 0.85 ± 0.028                                                                                                                                  | Odds ratios                               | Low,<br>Low,<br>Low,<br>High             |
| 4  |                              |                                                                    |                     |                         |               |                                                    |                                                              |                                                                                                                                                                                                                                                                                                                                                                                                           |                                                                                                                                                       |                                           |                                          |
| 5  | Wejse[75] / 2008             | Pulmonary TB patients on DOT                                       | 1996 - 2001         | Retrospective cohort    | Guinea Bissau | None                                               | 100/698 (14%)                                                | Cough, hemoptysis, dyspnea, chest pain, night sweating, anemia conjunctivae, tachycardia, positive funding at lung auscultation, temperature >37, BMI <18, BMI<16, MUAC<220, MUAC<200                                                                                                                                                                                                                     | AUROC = 0.65 (95% CI: 0.6-0.7)<br>Sensitivity = 0.45<br>Specificity = 0.75                                                                            | Risk score                                | Low,<br>High,<br>Low,<br>High            |
| 6  |                              |                                                                    |                     |                         |               |                                                    |                                                              |                                                                                                                                                                                                                                                                                                                                                                                                           |                                                                                                                                                       |                                           |                                          |
| 7  | Zhang[45] / 2019             | TB/HIV patients at end stage of AIDS                               | Aug 2009 – Jan 2018 | Retrospective cohort    | China         | Internal (split-sample)                            | Development: 157/807 (19%)<br>Validation: 40/200 (20%)       | Anemia, TB meningitis, severe pneumonia, hypoalbuminemia, unexplained infection or space-occupying lesions, malignancy                                                                                                                                                                                                                                                                                    | AUROC = 0.867 (95% CI: 0.832-0.902)<br>Sensitivity = 79.6%<br>Specificity = 82.9%                                                                     | Risk score                                | Low,<br>Low,<br>Low,<br>High             |
| 8  |                              |                                                                    |                     |                         |               |                                                    |                                                              |                                                                                                                                                                                                                                                                                                                                                                                                           |                                                                                                                                                       |                                           |                                          |
| 9  | 11 Treatment failure         |                                                                    |                     |                         |               |                                                    |                                                              |                                                                                                                                                                                                                                                                                                                                                                                                           |                                                                                                                                                       |                                           |                                          |
| 10 |                              |                                                                    |                     |                         |               |                                                    |                                                              |                                                                                                                                                                                                                                                                                                                                                                                                           |                                                                                                                                                       |                                           |                                          |
| 11 | Abdelbary[9] / 2017          | TB cases                                                           | 2006 - 2013         | Retrospective cohort    | Mexico        | Internal (split-sample)                            | Development: 2109†<br>Validation: 6322†                      | Education (no or low vs. higher than primary school), MDR, AFB smear (>+2, +1, negative)                                                                                                                                                                                                                                                                                                                  | c-statistic = 0.65<br>Sensitivity = 52%<br>Specificity = 66%                                                                                          | Risk score                                | Low,<br>High,<br>Low,<br>High            |
| 12 |                              |                                                                    |                     |                         |               |                                                    |                                                              |                                                                                                                                                                                                                                                                                                                                                                                                           |                                                                                                                                                       |                                           |                                          |
| 13 | Kalhor[49] (logistic) / 2010 | TB cases at DOTS registration                                      | 2005                | Retrospective cohort    | Iran          | Internal (split-sample)                            | Development: 828/4836 (17%)<br>Validation: 2418†             | Gender, age, weight nationality, prison, case type                                                                                                                                                                                                                                                                                                                                                        | AUROC = 0.70<br>Accuracy = 81.64%<br>HL test: X <sup>2</sup> =11.935, df=8, p=0.154                                                                   | Model coefficients                        | Unclear,<br>Unclear,<br>Unclear,<br>High |
| 14 |                              |                                                                    |                     |                         |               |                                                    |                                                              |                                                                                                                                                                                                                                                                                                                                                                                                           |                                                                                                                                                       |                                           |                                          |
| 15 | Keane[30] / 1997             | Smear-positive TB patients on standard first-line regimen with DOT | 1990 - 1995         | Non-nested case control | Vietnam       | None                                               | 130/803 (16%)                                                | 3 month model: Extensive lesions, mediastinal shift, average smear score 3rd month, weight, progressive x-ray, any previous treatment<br>Baseline model: Mediastinal shift, average smear score, extensive lesions, any previous treatment, cavities, weight                                                                                                                                              | 3 month:<br>Sensitivity = 80%<br>Specificity = 80%<br>Baseline:<br>Sensitivity = 70%<br>Specificity = 80%                                             | Model coefficients                        | High,<br>Unclear,<br>Unclear,<br>High    |
| 16 |                              |                                                                    |                     |                         |               |                                                    |                                                              |                                                                                                                                                                                                                                                                                                                                                                                                           |                                                                                                                                                       |                                           |                                          |
| 17 | Luijes[33] / 2017            | Smear-positive pulmonary TB cases on DOT                           | May 1999 – Jul 2002 | Nested case-control     | South Africa  | Internal (cross-validation)                        | 10/31 (32%)                                                  | 3,5,-Dihydroxybenzoic acid, (3-(4-Hydroxy-3-methoxyphenyl) propionic acid                                                                                                                                                                                                                                                                                                                                 | AUROC = 0.89 (95% CI: 0.7-1.00)                                                                                                                       | Model coefficients                        | High,<br>Unclear,<br>Unclear,<br>High    |
| 18 |                              |                                                                    |                     |                         |               |                                                    |                                                              |                                                                                                                                                                                                                                                                                                                                                                                                           |                                                                                                                                                       |                                           |                                          |
| 19 | Mburu[76] / 2018             | Smear-positive TB patients                                         | Feb 2014 – Aug 2015 | Prospective cohort      | Kenya         | Internal (cross-validation)                        | 13/321 (4%)                                                  | HbA1c, regimen (retreatment), age, weight, random blood glucose, BMI, BUN, HIV positive result, ever smoker, creatinine                                                                                                                                                                                                                                                                                   | AUROC = 0.56 ± 0.07                                                                                                                                   | Relative score                            | Low,<br>Low,<br>Low,<br>High             |
| 20 |                              |                                                                    |                     |                         |               |                                                    |                                                              |                                                                                                                                                                                                                                                                                                                                                                                                           |                                                                                                                                                       |                                           |                                          |
| 21 | 27 Default                   |                                                                    |                     |                         |               |                                                    |                                                              |                                                                                                                                                                                                                                                                                                                                                                                                           |                                                                                                                                                       |                                           |                                          |
| 22 |                              |                                                                    |                     |                         |               |                                                    |                                                              |                                                                                                                                                                                                                                                                                                                                                                                                           |                                                                                                                                                       |                                           |                                          |
| 23 | Thompson[77] / 2017          | HIV uninfected adults with newly diagnosed pulmonary TB            | Apr 2010 – Apr 2013 | Retrospective cohort    | South Africa  | Internal (cross-validation) and external (setting) | 6/99 (6%)                                                    | 18 splice junctions and 13 genes                                                                                                                                                                                                                                                                                                                                                                          | AUROC (internal) = 0.87<br>AUROC (external) = 0.63                                                                                                    | Heatmap of differentially expressed genes | Low,<br>Low,<br>Low,<br>High             |
| 24 |                              |                                                                    |                     |                         |               |                                                    |                                                              |                                                                                                                                                                                                                                                                                                                                                                                                           |                                                                                                                                                       |                                           |                                          |
| 25 | Abdelbary[9] / 2017 (TB-DM)  | TB cases                                                           | 2006 - 2013         | Retrospective cohort    | Mexico        | None                                               | 93/2121 (4%)                                                 | Age (<40 vs. ≥40), sex, HIV                                                                                                                                                                                                                                                                                                                                                                               | c-statistic= 0.62                                                                                                                                     | Risk score                                | Unclear,<br>High,<br>Unclear,<br>High    |
| 26 |                              |                                                                    |                     |                         |               |                                                    |                                                              |                                                                                                                                                                                                                                                                                                                                                                                                           |                                                                                                                                                       |                                           |                                          |
| 27 | Belilovsky[35] / 2010        | Hospitalized TB patients                                           | 1993 - 2002         | Retrospective cohort    | Russia        | External (geographical)                            | Development: 1326/3904 (34%)<br>Validation: 4662/12803 (36%) | Sex, unemployment, retreatment case, alcohol abuse (yes, no, data), severe TB form, residence (urban vs. rural), age (25-50 vs. other), pulmonary TB (vs extrapulmonary), prison history                                                                                                                                                                                                                  | Belgrood: AUROC = 0.75<br>Orel: AUROC = 0.75<br>Pskov: AUROC = 0.78<br>Yaroslavi: AUROC = 0.75<br>Calibration table                                   | Model coefficients                        | Unclear,<br>High,<br>High,<br>High       |
| 28 |                              |                                                                    |                     |                         |               |                                                    |                                                              |                                                                                                                                                                                                                                                                                                                                                                                                           |                                                                                                                                                       |                                           |                                          |
| 29 | Chang[31] / 2004             | All tuberculosis patients                                          | Jan 1999 – Mar 1999 | Nested case-control     | China         | None                                               | 102/408 (25%)                                                | Baseline:* Ever smoker (current, former, never), retreatment (history of default, no history of default, not)<br>Longitudinal: Smoking status (current, former, never), retreatment (with history of default, without history of default, never), unsatisfactory adherence in first two months (good, poor, fair, unknown), subsequent hospitalization, treatment side effects in last month of treatment | Baseline:*<br>AUROC = 0.70 (95% CI: 0.63-0.76)<br>HL test: X <sup>2</sup> = 1.448, df=5, p=0.919<br>Longitudinal:<br>AUROC = 0.85 (95% CI: 0.80-0.90) | Odds ratios                               | High,<br>High,<br>Low,<br>High           |
| 30 |                              |                                                                    |                     |                         |               |                                                    |                                                              |                                                                                                                                                                                                                                                                                                                                                                                                           |                                                                                                                                                       |                                           |                                          |

|    |                                 |                                                                      |                                   |                         |                                                |                         |                                                        |                                                                                                                                                                                                                                                                                                                                                                                                                                                                                                                                                                                                                                                                                                                           |                                                                                     |                    |                                 |
|----|---------------------------------|----------------------------------------------------------------------|-----------------------------------|-------------------------|------------------------------------------------|-------------------------|--------------------------------------------------------|---------------------------------------------------------------------------------------------------------------------------------------------------------------------------------------------------------------------------------------------------------------------------------------------------------------------------------------------------------------------------------------------------------------------------------------------------------------------------------------------------------------------------------------------------------------------------------------------------------------------------------------------------------------------------------------------------------------------------|-------------------------------------------------------------------------------------|--------------------|---------------------------------|
| 1  |                                 |                                                                      |                                   |                         |                                                |                         |                                                        | HL test: $X^2 = 5.887$ , $df=6$ , $p=0.436$                                                                                                                                                                                                                                                                                                                                                                                                                                                                                                                                                                                                                                                                               |                                                                                     |                    |                                 |
| 2  | Chee[78] / 2000                 | TB cases                                                             | 1996                              | Nested case-control     | Singapore                                      | None                    | 38/71 (54%)                                            | Chinese race, extent of family support, treatment duration                                                                                                                                                                                                                                                                                                                                                                                                                                                                                                                                                                                                                                                                | Accuracy = 74.6%                                                                    | Model coefficients | High, Unclear, High, High       |
| 4  |                                 |                                                                      |                                   |                         |                                                |                         |                                                        |                                                                                                                                                                                                                                                                                                                                                                                                                                                                                                                                                                                                                                                                                                                           | AUROC = 0.85 (95% CI: 0.80-0.90)                                                    |                    | High, High, High, High          |
| 5  | Cherkaoui[29] / 2014            | TB patients with definite or probable pulmonary or extrapulmonary TB | Jun 2010 – Oct 2011               | Non-nested case-control | Morocco                                        | None                    | 91/277 (33%)                                           | Age <50, work interfering with ability to take TB treatment, retreatment regimen, daily DOT, moderate or severe side effects, told friends about TB, current smoker, never smoker, symptom resolution in <2 months, knowledge of TB treatment duration                                                                                                                                                                                                                                                                                                                                                                                                                                                                    | Sensitivity = 82.4%<br>Specificity = 87.6%<br>HL test: $X^2=0.77$ , $p$ -value=1.00 | Survey tool        | High, High, High, High          |
| 8  |                                 |                                                                      |                                   |                         |                                                |                         |                                                        |                                                                                                                                                                                                                                                                                                                                                                                                                                                                                                                                                                                                                                                                                                                           | AUROC = 0.67 (95% CI: 0.65-0.70)                                                    |                    | Low, Low, Low, High             |
| 9  | Rodrigo[79] / 2012              | New TB cases                                                         | Jan 2006 – Dec 2009               | Prospective cohort      | Spain                                          | Internal (split-sample) | Development: 92/1490 (6%)<br>Validation: 103/1589 (6%) | Immigrant, living alone, living in an institution, previous TB treatment, linguistic barriers (poor understanding), IV drug use, unknown IV drug use                                                                                                                                                                                                                                                                                                                                                                                                                                                                                                                                                                      | Sensitivity = 65.05%<br>Specificity = 67.36%                                        | Risk score         | Low, Low, Low, High             |
| 11 | Unfavorable outcome             |                                                                      |                                   |                         |                                                |                         |                                                        |                                                                                                                                                                                                                                                                                                                                                                                                                                                                                                                                                                                                                                                                                                                           |                                                                                     |                    |                                 |
| 12 |                                 |                                                                      |                                   |                         |                                                |                         |                                                        |                                                                                                                                                                                                                                                                                                                                                                                                                                                                                                                                                                                                                                                                                                                           |                                                                                     |                    |                                 |
| 13 | Kalhor[50] (predicting) / 2009† | TB patients at DOT registration                                      | 2005                              | Retrospective cohort    | Iran                                           | Internal (split-sample) | Development: 6920†<br>Validation: 2966†                | Age, gender, nationality, prison, area, weight                                                                                                                                                                                                                                                                                                                                                                                                                                                                                                                                                                                                                                                                            | Classification rate = 89.8%<br>R2 = 0.45                                            | Model coefficients | Unclear, Unclear, Unclear, High |
| 15 |                                 |                                                                      |                                   |                         |                                                |                         |                                                        |                                                                                                                                                                                                                                                                                                                                                                                                                                                                                                                                                                                                                                                                                                                           |                                                                                     |                    |                                 |
| 16 |                                 |                                                                      |                                   |                         |                                                |                         |                                                        |                                                                                                                                                                                                                                                                                                                                                                                                                                                                                                                                                                                                                                                                                                                           | FS:*                                                                                |                    |                                 |
| 17 |                                 |                                                                      |                                   |                         |                                                |                         |                                                        |                                                                                                                                                                                                                                                                                                                                                                                                                                                                                                                                                                                                                                                                                                                           | AUROC = 0.74 (95% CI: 0.66-0.82)                                                    |                    |                                 |
| 18 |                                 |                                                                      |                                   |                         |                                                |                         |                                                        |                                                                                                                                                                                                                                                                                                                                                                                                                                                                                                                                                                                                                                                                                                                           | Sensitivity = 0.36                                                                  |                    |                                 |
| 19 |                                 |                                                                      |                                   |                         |                                                |                         |                                                        |                                                                                                                                                                                                                                                                                                                                                                                                                                                                                                                                                                                                                                                                                                                           | Specificity = 0.89                                                                  |                    |                                 |
| 20 |                                 |                                                                      |                                   |                         |                                                |                         |                                                        |                                                                                                                                                                                                                                                                                                                                                                                                                                                                                                                                                                                                                                                                                                                           | Misclassification = 0.24                                                            |                    |                                 |
| 21 |                                 |                                                                      |                                   |                         |                                                |                         |                                                        |                                                                                                                                                                                                                                                                                                                                                                                                                                                                                                                                                                                                                                                                                                                           | BE:                                                                                 |                    |                                 |
| 22 |                                 |                                                                      |                                   |                         |                                                |                         |                                                        |                                                                                                                                                                                                                                                                                                                                                                                                                                                                                                                                                                                                                                                                                                                           | AUROC = 0.73 (95% CI: 0.65-0.81)                                                    |                    |                                 |
| 23 |                                 |                                                                      |                                   |                         |                                                |                         |                                                        |                                                                                                                                                                                                                                                                                                                                                                                                                                                                                                                                                                                                                                                                                                                           | Sensitivity = 0.3                                                                   |                    |                                 |
| 24 |                                 |                                                                      |                                   |                         |                                                |                         |                                                        |                                                                                                                                                                                                                                                                                                                                                                                                                                                                                                                                                                                                                                                                                                                           | Specificity = 0.88                                                                  |                    |                                 |
| 25 |                                 |                                                                      |                                   |                         |                                                |                         |                                                        |                                                                                                                                                                                                                                                                                                                                                                                                                                                                                                                                                                                                                                                                                                                           | Misclassification = 0.27                                                            |                    |                                 |
| 26 |                                 |                                                                      |                                   |                         |                                                |                         |                                                        |                                                                                                                                                                                                                                                                                                                                                                                                                                                                                                                                                                                                                                                                                                                           | SS:                                                                                 |                    |                                 |
| 27 |                                 |                                                                      |                                   |                         |                                                |                         |                                                        |                                                                                                                                                                                                                                                                                                                                                                                                                                                                                                                                                                                                                                                                                                                           | AUROC = 0.73 (95% CI: 0.65-0.81)                                                    |                    |                                 |
| 28 |                                 |                                                                      |                                   |                         |                                                |                         |                                                        |                                                                                                                                                                                                                                                                                                                                                                                                                                                                                                                                                                                                                                                                                                                           | Sensitivity = 0.30                                                                  |                    |                                 |
| 29 | Sauer[57] / 2018†               | TB cases                                                             | Data available through March 2018 | Retrospective cohort    | Azerbaijan, Belarus, Georgia, Moldova, Romania | Internal (split-sample) | Development: 103/411 (25%)<br>Validation: 44/176 (25%) | Forward selection (FS):*<br>Drug sensitivity, employment status, smear microscopy, dissemination<br>Backwards elimination (BE):<br>Drug sensitivity, employment status, smear microscopy, dissemination<br>Stepwise selection (SS):<br>Drug sensitivity, employment status, smear microscopy, dissemination<br>Lasso:<br>Country, employment, extrapulmonary, cavity size, decrease in lung capacity, smear microscopy, drug sensitivity, chest imaging<br>Random forest (RF):<br>Top 5 by mean decrease accuracy: lung cavity size, type of resistance, employment status, country, total cavities<br>Top 5 by mean decrease Gini index: Age of onset, drug regimen, lung cavity size, number of daily contacts, culture | Misclassification = 0.23                                                            | List               | Unclear, Unclear, High          |
| 30 |                                 |                                                                      |                                   |                         |                                                |                         |                                                        |                                                                                                                                                                                                                                                                                                                                                                                                                                                                                                                                                                                                                                                                                                                           | Specificity = 0.96                                                                  |                    |                                 |
| 31 |                                 |                                                                      |                                   |                         |                                                |                         |                                                        |                                                                                                                                                                                                                                                                                                                                                                                                                                                                                                                                                                                                                                                                                                                           | Misclassification = 0.23                                                            |                    |                                 |
| 32 |                                 |                                                                      |                                   |                         |                                                |                         |                                                        |                                                                                                                                                                                                                                                                                                                                                                                                                                                                                                                                                                                                                                                                                                                           | RF:                                                                                 |                    |                                 |
| 33 |                                 |                                                                      |                                   |                         |                                                |                         |                                                        |                                                                                                                                                                                                                                                                                                                                                                                                                                                                                                                                                                                                                                                                                                                           | AUROC = 0.73 (95% CI: 0.65-0.81)                                                    |                    |                                 |
| 34 |                                 |                                                                      |                                   |                         |                                                |                         |                                                        |                                                                                                                                                                                                                                                                                                                                                                                                                                                                                                                                                                                                                                                                                                                           | Sensitivity = 0.30                                                                  |                    |                                 |
| 35 |                                 |                                                                      |                                   |                         |                                                |                         |                                                        |                                                                                                                                                                                                                                                                                                                                                                                                                                                                                                                                                                                                                                                                                                                           | Specificity = 0.88                                                                  |                    |                                 |
| 36 |                                 |                                                                      |                                   |                         |                                                |                         |                                                        |                                                                                                                                                                                                                                                                                                                                                                                                                                                                                                                                                                                                                                                                                                                           | Misclassification = 0.27                                                            |                    |                                 |
| 37 |                                 |                                                                      |                                   |                         |                                                |                         |                                                        |                                                                                                                                                                                                                                                                                                                                                                                                                                                                                                                                                                                                                                                                                                                           | SVM linear:                                                                         |                    |                                 |
| 38 |                                 |                                                                      |                                   |                         |                                                |                         |                                                        |                                                                                                                                                                                                                                                                                                                                                                                                                                                                                                                                                                                                                                                                                                                           | AUROC = 0.69 (95% CI: 0.60-0.77)                                                    |                    |                                 |
| 39 |                                 |                                                                      |                                   |                         |                                                |                         |                                                        |                                                                                                                                                                                                                                                                                                                                                                                                                                                                                                                                                                                                                                                                                                                           | Sensitivity = 0.21                                                                  |                    |                                 |
| 40 |                                 |                                                                      |                                   |                         |                                                |                         |                                                        |                                                                                                                                                                                                                                                                                                                                                                                                                                                                                                                                                                                                                                                                                                                           | Specificity = 0.94                                                                  |                    |                                 |
| 41 |                                 |                                                                      |                                   |                         |                                                |                         |                                                        |                                                                                                                                                                                                                                                                                                                                                                                                                                                                                                                                                                                                                                                                                                                           | Misclassification = 0.24                                                            |                    |                                 |
| 42 |                                 |                                                                      |                                   |                         |                                                |                         |                                                        |                                                                                                                                                                                                                                                                                                                                                                                                                                                                                                                                                                                                                                                                                                                           | SVM polynomial:                                                                     |                    |                                 |
| 43 |                                 |                                                                      |                                   |                         |                                                |                         |                                                        |                                                                                                                                                                                                                                                                                                                                                                                                                                                                                                                                                                                                                                                                                                                           | AUROC = 0.69 (95% CI: 0.60-0.77)                                                    |                    |                                 |
| 44 |                                 |                                                                      |                                   |                         |                                                |                         |                                                        |                                                                                                                                                                                                                                                                                                                                                                                                                                                                                                                                                                                                                                                                                                                           | Sensitivity = 0                                                                     |                    |                                 |
| 45 |                                 |                                                                      |                                   |                         |                                                |                         |                                                        |                                                                                                                                                                                                                                                                                                                                                                                                                                                                                                                                                                                                                                                                                                                           | Specificity = 1                                                                     |                    |                                 |
| 46 |                                 |                                                                      |                                   |                         |                                                |                         |                                                        |                                                                                                                                                                                                                                                                                                                                                                                                                                                                                                                                                                                                                                                                                                                           | Misclassification = 0.25                                                            |                    |                                 |



|    |                                          |                                                     |                     |                      |          |                             |                                                                               |                                                                                                                                                                                                                                                                                                                                                                                                                                                                                     |                                                                                                                                                        |                    |                              |
|----|------------------------------------------|-----------------------------------------------------|---------------------|----------------------|----------|-----------------------------|-------------------------------------------------------------------------------|-------------------------------------------------------------------------------------------------------------------------------------------------------------------------------------------------------------------------------------------------------------------------------------------------------------------------------------------------------------------------------------------------------------------------------------------------------------------------------------|--------------------------------------------------------------------------------------------------------------------------------------------------------|--------------------|------------------------------|
| 1  | Baussano[47] / 2008 <sup>§</sup>         | Pulmonary TB cases                                  | 2001 - 2005         | Retrospective cohort | Italy    | Internal (bootstrap)        | 576/1242 (46%)                                                                | Residency (residential vs. homeless), sex, geographic origin (non-EU vs. EU), case definition (other than definite vs. definite), treatment setting (inpatient and unknown vs. outpatient), age (continuous)                                                                                                                                                                                                                                                                        | AUROC= 0.75<br>Calibration slope = 0.98<br>R <sup>2</sup> = 0.24                                                                                       | Nomogram           | Low, Unclear, Low, High      |
| 3  | Costa-Veiga[48] / 2017 <sup>§</sup>      | Pulmonary TB cases                                  | 2000 - 2012         | Retrospective cohort | Portugal | External (temporal)         | <i>Development:</i> 1152/10766 (11%)<br><i>Validation:</i> 4714 <sup>†</sup>  | HIV, previous treatment, age class (25-44, 15-24, 45-64, >64), IV drug use, pathologies (other disease comorbidity)                                                                                                                                                                                                                                                                                                                                                                 | AUROC = 75.9% (95% CI: 74.1-77.7)<br>Sensitivity = 71%<br>Specificity = 73%                                                                            | Nomogram           | Low, Low, Low, High          |
| 7  | Killian[34] / 2019 <sup>§</sup>          | TB patients (99DOTS program)                        | Feb 2017 – Sep 2018 | Retrospective cohort | India    | None                        | 433/4167 (10%)                                                                | <u>LEAP</u> :* Lstm rEal-time Adherence Predictor with 2 input layers, 1) LSTM with 64 hidden units and a dense layer with 48 units for the dense layer and 4 units for the penultimate layer<br><u>w-misses</u> : missed doses in last week<br><u>t-misses</u> : total missed doses in 35 days units and a dense layer with 48 units for the dense layer and 4 units for the penultimate layer<br><u>Random forest</u> : 150 trees and no max depth based on DAT from first 35 day | <u>LEAP</u> *<br>AUROC = 0.743<br><u>lw-misses</u> :<br>AUROC = 0.607<br><u>t-misses</u> :<br>AUROC = 0.630<br><u>Random forest</u> :<br>AUROC = 0.722 | None               | High, High, Unclear, High    |
| 13 | Madan[51] / 2018 <sup>§</sup>            | TB-HIV patients on DOT with first-line TB treatment | 2015                | Retrospective cohort | India    | None                        | 78/448 (17%)                                                                  | Sputum smear grade, previous TB, disease classification, HIV status, ART status, CD4 cell count, sex and age group (with interaction terms between age group and sex; sputum smear status and type of TB; HIV status at TB diagnosis and CD4 cell category).                                                                                                                                                                                                                        | AUROC = 0.783<br>HL test p-value = 0.149                                                                                                               | Model coefficients | Low, Low, Low, High          |
| 16 | Mburu[76] / 2018 <sup>§</sup>            | Smear-positive TB patients                          | Feb 2014 – Aug 2015 | Prospective cohort   | Kenya    | Internal (cross-validation) | 32/340 (9%)                                                                   | HbA1c, treatment regimen (retreatment), creatinine, BMI, BUN, weight, age, random blood glucose, HIV positive result, male gender                                                                                                                                                                                                                                                                                                                                                   | AUROC = 0.65 ± 0.06                                                                                                                                    | Relative score     | Low, Low, Low, High          |
| 19 | Other outcome                            |                                                     |                     |                      |          |                             |                                                                               |                                                                                                                                                                                                                                                                                                                                                                                                                                                                                     |                                                                                                                                                        |                    |                              |
| 20 | Kalhorji[80] (fuzzy) / 2009 <sup>§</sup> | TB patients at DOTS registration                    | 2005                | Retrospective cohort | Iran     | Internal (split-sample)     | <i>Development:</i> 7254 <sup>†</sup><br><i>Validation:</i> 2418 <sup>†</sup> | Case type, treatment category, risky sex, prison, sex, recent TB infection, diabetes, low body weight, TB type, length, previous imprisonment, age, area, HIV                                                                                                                                                                                                                                                                                                                       | Mean absolute percentage error = 1.24                                                                                                                  | Learned parameters | Unclear, Unclear, High, High |
| 24 | Hussain[56] / 2019 <sup>¶</sup>          | Pulmonary and extrapulmonary TB patients (TB Reach) | 2011 - 2014         | Retrospective cohort | Unknown  | Internal (split-sample)     | <i>Development:</i> 3371 <sup>†</sup><br><i>Validation:</i> 842 <sup>†</sup>  | Random forest*, artificial neural networks, and SVM                                                                                                                                                                                                                                                                                                                                                                                                                                 | <u>Random forest</u> :*<br>Accuracy = 76.32%                                                                                                           | None               | Unclear, Unclear, High       |

Abbreviations: AUROC=Area under receiver operating characteristic; c-statistic=concordance statistic; DOTS=Directly Observed Therapy, DM=Diabetes; HL=Hosmer-Lemeshow; TB=Tuberculosis;

\*Indicates best-performing/most relevant model, which is included throughout the manuscript (see methods section for details). Performance measures are reported for highest level of validation performed (ranked from strongest to weakest: external validation, internal validation, no validation). If internal and external validation were performed, both are reported.

<sup>†</sup>Outcome number unknown

<sup>‡</sup>Outcome is composite of death and treatment failure (losses to follow-up and not evaluated (unknown) outcomes were excluded)

<sup>§</sup>Outcome is composite of death, treatment failure, loss to follow-up, and not evaluated

<sup>¶</sup>Outcome is a value from 1 to 5 (1= patient completed the treatment course in frame of DOTS, 2=cured, 3= quit treatment, 4=failed treatment and 5=death)

<sup>||</sup>Outcome is treatment completion



**Table 3.** Characteristics of patient populations in the 33 included studies with prediction models for tuberculosis treatment outcomes

| Characteristic             | Studies reporting characteristic, n (% of total) | Categories                               | N(%) or Median [IQR] |
|----------------------------|--------------------------------------------------|------------------------------------------|----------------------|
| Sample size                | 33 (11)                                          | -                                        | 803 [291, 4167]      |
| Study duration, years      | 32 (97)                                          | -                                        | 4 [2,7]              |
| Study design               | 33 (100)                                         | Prospective cohort                       | 3 (9)                |
|                            |                                                  | Retrospective cohort                     | 25 (76)              |
|                            |                                                  | Nested case-control                      | 3 (9)                |
|                            |                                                  | Non-nested case-control                  | 2 (6)                |
| Data source                | 33 (100)                                         | Medical record                           | 6 (18)               |
|                            |                                                  | National registry or surveillance system | 13 (39)              |
|                            |                                                  | Local registry or surveillance system    | 1 (3)                |
|                            |                                                  | Regional registry or surveillance system | 2 (6)                |
|                            |                                                  | Data collect form for study purposes     | 11 (33)              |
| Study region               | 32 (97)                                          | Africa                                   | 8 (25)               |
|                            |                                                  | Asia                                     | 13 (41)              |
|                            |                                                  | Europe                                   | 6 (19)               |
|                            |                                                  | North America                            | 4 (12)               |
|                            |                                                  | South America                            | 0 (0)                |
|                            |                                                  | Global                                   | 1 (3)                |
| High burden TB setting*    | 31 (94)                                          | All                                      | 143(42)              |
|                            |                                                  | Some                                     | 1 (3)                |
|                            |                                                  | None                                     | 17 (55)              |
| Missing data               | 18 (54)                                          | Complete case-analysis                   | 9 (50)               |
|                            |                                                  | Missing indicator method                 | 4 (22)               |
|                            |                                                  | Heckman's method                         | 1 (6)                |
|                            |                                                  | Simple imputation                        | 2 (12)               |
|                            |                                                  | Sensitivity analysis with imputation     | 1 (6)                |
|                            |                                                  | Other                                    | 1 (5)                |
| Number of models developed | 33 (100)                                         | 1                                        | 25 (76)              |
|                            |                                                  | 2                                        | 4 (12)               |
|                            |                                                  | 3                                        | 1 (3)                |

|                                       |        |                                    |        |
|---------------------------------------|--------|------------------------------------|--------|
|                                       |        | 4                                  | 2 (6)  |
|                                       |        | 7                                  | 1 (3)  |
| Reasons for multiple models developed | 8 (24) | Different outcomes                 | 1 (12) |
|                                       |        | Different predictors considered    | 4 (50) |
|                                       |        | Different methods                  | 2 (25) |
|                                       |        | Different outcomes                 | 1 (12) |
|                                       |        | Different populations and outcomes | 1 (12) |

\*Determined based on study location and WHO list of 30 high-burden TB countries in the 2019 Global Tuberculosis Report (1).

**Table 4.** Study population characteristics of 33 included studies

| Characteristic                 | Included? |    |         | Median [IQR] <sup>‡</sup> , n |
|--------------------------------|-----------|----|---------|-------------------------------|
|                                | Yes       | No | Unknown |                               |
| Age*                           | -         | -  | 15      | 41 [37, 49], n=18             |
| HIV                            | 18        | 7  | 8       | 23% [10-100], n=17            |
| Diabetes                       | 12        | 2  | 19      | 12% [5-21], n=11              |
| MDR                            | 8         | 7  | 18      | 1% [1-3], n=8                 |
| Other drug resistance          | 12        | 1  | 20      | 6% [4-12], n=10               |
| Extrapulmonary TB <sup>†</sup> | 22        | 4  | 7       | 11% [4-17], n=16              |
| Previous TB                    | 20        | 1  | 12      | 19% [9-30], n=17              |
| DOT                            | 14        | 0  | 19      | 100% [100-100], n=14          |
| Hospitalized patients          | 13        | 1  | 19      | 100% [100-100], n=10          |

Abbreviations: DOT=directly observed therapy; IQR=interquartile range; MDR=multi-drug resistance; TB=tuberculosis

\*Based on the measure of central tendency reported in the study (mean: n=11; median: n=7)

<sup>†</sup>Forms of extrapulmonary TB differ by study but included some of the following: Miliary, meningeal, pleural, peritoneal, disseminated, blood/bone, abdominal

<sup>‡</sup>Other than age (which is reported in years), this is the percentage of the population that has the characteristic among studies that include patients with the characteristic. For example, among the 18 studies that include persons with HIV, 17 report how many people had HIV and among those, the median percentage of the population with HIV is 23%.

**Table 5.** Methods reported for the 37 models of the 33 included studies with prediction models for tuberculosis treatment outcomes

| Characteristic                                            | Studies reporting characteristic, n (%) | Categories                                            | N(%) or median [IQR]      |
|-----------------------------------------------------------|-----------------------------------------|-------------------------------------------------------|---------------------------|
| Type of outcome                                           | 37 (100)                                | Single                                                | 29 (78)                   |
|                                                           |                                         | Composite                                             | 8 (22)                    |
| Outcome                                                   | 37 (100)                                | Death                                                 | 16 (43)                   |
|                                                           |                                         | Treatment failure                                     | 6 (16)                    |
|                                                           |                                         | Default, Loss to follow-up, or treatment interruption | 6 (16)                    |
|                                                           |                                         | Unfavorable outcome                                   | 6 (16)                    |
|                                                           |                                         | Treatment success                                     | 2 (6)                     |
|                                                           |                                         | Other <sup>‡</sup>                                    | 1 (3)                     |
| Number - prevalence of outcome*                           | 32 (87)                                 | -                                                     | 94 [38-171]<br>15% [9-26] |
| Events per candidate variable <sup>†</sup>                | 30 (81)                                 | -                                                     | 6 [3-11]                  |
| Events per variable (in final model)                      | 29 (78)                                 | -                                                     | 14 [9-26]                 |
| Predictor types                                           |                                         | Clinical/epidemiologic                                | 34 (92)                   |
|                                                           |                                         | Adherence                                             | 1 (3)                     |
|                                                           |                                         | Biomarker                                             | 2 (5)                     |
| Analysis                                                  | 37 (100)                                | Logistic regression                                   | 29 (78)                   |
|                                                           |                                         | Survival analysis                                     | 3 (8)                     |
|                                                           |                                         | Machine learning                                      | 5 (14)                    |
| Method for considering predictors in multivariable models | 36 (97)                                 | All candidate predictors                              | 12 (32)                   |
|                                                           |                                         | Based on unadjusted association with outcome          | 19 (51)                   |
|                                                           |                                         | Based on clinical relevance                           | 1 (3)                     |
|                                                           |                                         | Other <sup>§</sup>                                    | 4 (14)                    |
| Selection of predictors during modeling                   | 31 (84)                                 | Full model approach                                   | 2 (6)                     |
|                                                           |                                         | Forward selection                                     | 7 (23)                    |
|                                                           |                                         | Backwards elimination                                 | 5 (16)                    |
|                                                           |                                         | Stepwise selection                                    | 8 (26)                    |
|                                                           |                                         | Random Forest                                         | 1 (3)                     |
|                                                           |                                         | Hosmer-Lemeshow model building criteria               | 4 (13)                    |
|                                                           |                                         | Bayesian model averaging                              | 3 (10)                    |
|                                                           |                                         | Pairwise selection                                    | 1 (3)                     |

|                                    |         |                                                      |                   |
|------------------------------------|---------|------------------------------------------------------|-------------------|
| P-value for consideration in model | 17 (46) | 0·01                                                 | 2 (12)            |
|                                    |         | 0·05                                                 | 3 (18)            |
|                                    |         | 0·11                                                 | 1 (6)             |
|                                    |         | 0·2                                                  | 6 (35)            |
|                                    |         | 0·25                                                 | 5 (29)            |
| P-value for retention in MV model  | 20 (54) | 0·05                                                 | 9 (45)            |
|                                    |         | 0·1                                                  | 9 (45)            |
|                                    |         | 0·15                                                 | 1 (5)             |
|                                    |         | 0·2                                                  | 1 (5)             |
| Internal validation                | 19 (51) | Split-sample                                         | 10 (53)           |
|                                    |         | Bootstrap                                            | 5 (26)            |
|                                    |         | Cross-validation                                     | 4 (21)            |
| External validation                | 6 (16)  | Temporal                                             | 1 (17)            |
|                                    |         | Geographic                                           | 1 (4)             |
|                                    |         | Setting                                              | 4 (67)            |
| Calibration                        | 17 (46) | Calibration plot <sup>†</sup>                        | 2 (12)            |
|                                    |         | Calibration slope <sup>†</sup>                       | 1 (6)             |
|                                    |         | Hosmer-Lemeshow goodness of fit p-value <sup>†</sup> | 13 (77)           |
|                                    |         |                                                      | 0·51 [0·20, 0·79] |
|                                    |         | Calibration table <sup>†</sup>                       | 2 (12)            |
|                                    |         | Mean absolute error <sup>†</sup>                     | 1 (6)             |
| Discrimination                     | 30 (81) | C-statistic (AUROC) <sup>†</sup>                     | 30 (100)          |
|                                    |         |                                                      | 0·75 [0·68-0·84]  |
|                                    |         | Log rank test <sup>†</sup>                           | 2 (5)             |
| Classification                     | 18 (49) | Sensitivity <sup>‡</sup>                             | 14 (78)           |
|                                    |         |                                                      | 70 [54, 78]       |
|                                    |         | Specificity <sup>‡</sup>                             | 13 (72)           |
|                                    |         |                                                      | 75 [71, 88]       |
|                                    |         | Accuracy                                             | 2 (11)            |
|                                    |         | Other**                                              | 2 (11)            |
| Model presentation                 | 34 (92) | Risk score                                           | 16 (43)           |
|                                    |         | Model coefficient                                    | 8 (22)            |
|                                    |         | Nomogram                                             | 2 (6)             |
|                                    |         | Odds ratios/relative scores                          | 4 (12)            |
|                                    |         | Survey tool                                          | 1 (3)             |

Abbreviations: AUROC=area under receiver operating characteristic; c-statistic=concordance statistic

\*Prevalence of outcome in the population used to develop the prediction model (i.e. derivation/development subset if split-sample technique was used or full sample if the model was not validated or if bootstrap/cross-validation was used)

†Only 5 studies report the exact number of predictors considered. Otherwise, the number of candidate predictors was estimated from the provided tables or lists of candidate predictors in the source paper.

1  
2  
3 ‡Outcome is a value from 1 to 5 (1= patient completed the treatment course in frame of DOTS,  
4 2=cured, 3= quit treatment, 4=failed treatment and 5=death)

5 §Other methods of determining which variables to consider for prediction model include:  
6 principal components analysis (n=1), screening for multi-collinearity via correlation coefficient  
7 (n=1), one study used a combination of a priori and selection via univariable association, and the  
8 other used machine learning pre-processing (n=1)

9 ¶Sums to more than 100%, because some studies report multiple measures of calibration or  
10 discrimination

11 ||Based on the following cut-off methods: Youden (n=4) concordance probability (n=1),  
12 estimated at nearest 0,1 for studies that present a range of sensitivity and specificity in a table or  
13 figure (n=4), or unknown (n=5)

14 \*\*Other includes one study that reports false positive rate and one study that includes a graph of  
15 sensitivity vs. specificity.

1  
2  
3 **Figure 2.** Most common predictors considered and included  
4

5  
6 [See Figure 2]

7 Figure 2 legend:

8 Considered: the predictor as evaluated as a candidate predictor prior to multivariable modeling

9 Included: the predictor was considered and subsequently included in the final multivariable  
10 model  
11

12  
13 **Figure 3.** Heatmap of signaling questions from risk of bias assessment with PROBAST  
14

15  
16 [See Figure 3]  
17

18 Figure 3 legend:

19 PROBAST questions (additional details in Supplemental File 5)

20 Participants 1: What study design was used and was it appropriate?

21 Participants 2: Were all inclusion and exclusion criteria appropriate?

22 Predictors 1: Were predictors defined as assessed the same way for all participants?

23 Predictors 2: Were predictor assessments made without knowledge of data outcome?

24 Predictors 3: Are all predictors available at the time the model was intended to be used?

25 Outcome 1: Was the outcome determined appropriately?

26 Outcome 2: Was the outcome pre-specified or standard?

27 Outcome 3: Were predictors excluded from outcome definition?

28 Outcome 4: Was the outcome defined and determined in a similar way for all participants?

29 Outcome 5: Was the outcome determined without predictor information?

30 Outcome 6: Was the time interval between predictor assessment and outcome determination  
31 appropriate?  
32

33 Analysis 1: Were there a reasonable number of participants with the outcome?

34 Analysis 2: Were continuous and categorical variables handled appropriately?

35 Analysis 3: Were all enrolled participants included in the analysis?

36 Analysis 4: Were participants with missing data handled appropriately?

37 Analysis 5: Was selection of predictors based on univariable analysis avoided?

38 Analysis 6: Were complexities in data (censoring, competing risks, sampling of control  
39 participants) accounted for appropriately?  
40

41 Analysis 7: Were relevant model performance measures evaluated appropriately?

42 Analysis 8: Were model overfitting, underfitting, and optimism in the model performance  
43 accounted for?  
44

45 Analysis 9: Do predictors and their assigned weights in the final model correspond to the results  
46 from the reported multivariable analysis?  
47  
48  
49  
50  
51  
52  
53  
54  
55  
56  
57  
58  
59  
60

1  
2  
3 **Figure 4.** Summary of risk of bias and applicability assessment with PROBAST  
4

5  
6 **[See Figure 4]**  
7  
8  
9  
10  
11  
12  
13  
14  
15  
16  
17  
18  
19  
20  
21  
22  
23  
24  
25  
26  
27  
28  
29  
30  
31  
32  
33  
34  
35  
36  
37  
38  
39  
40  
41  
42  
43  
44  
45  
46  
47  
48  
49  
50  
51  
52  
53  
54  
55  
56  
57  
58  
59  
60

For peer review only



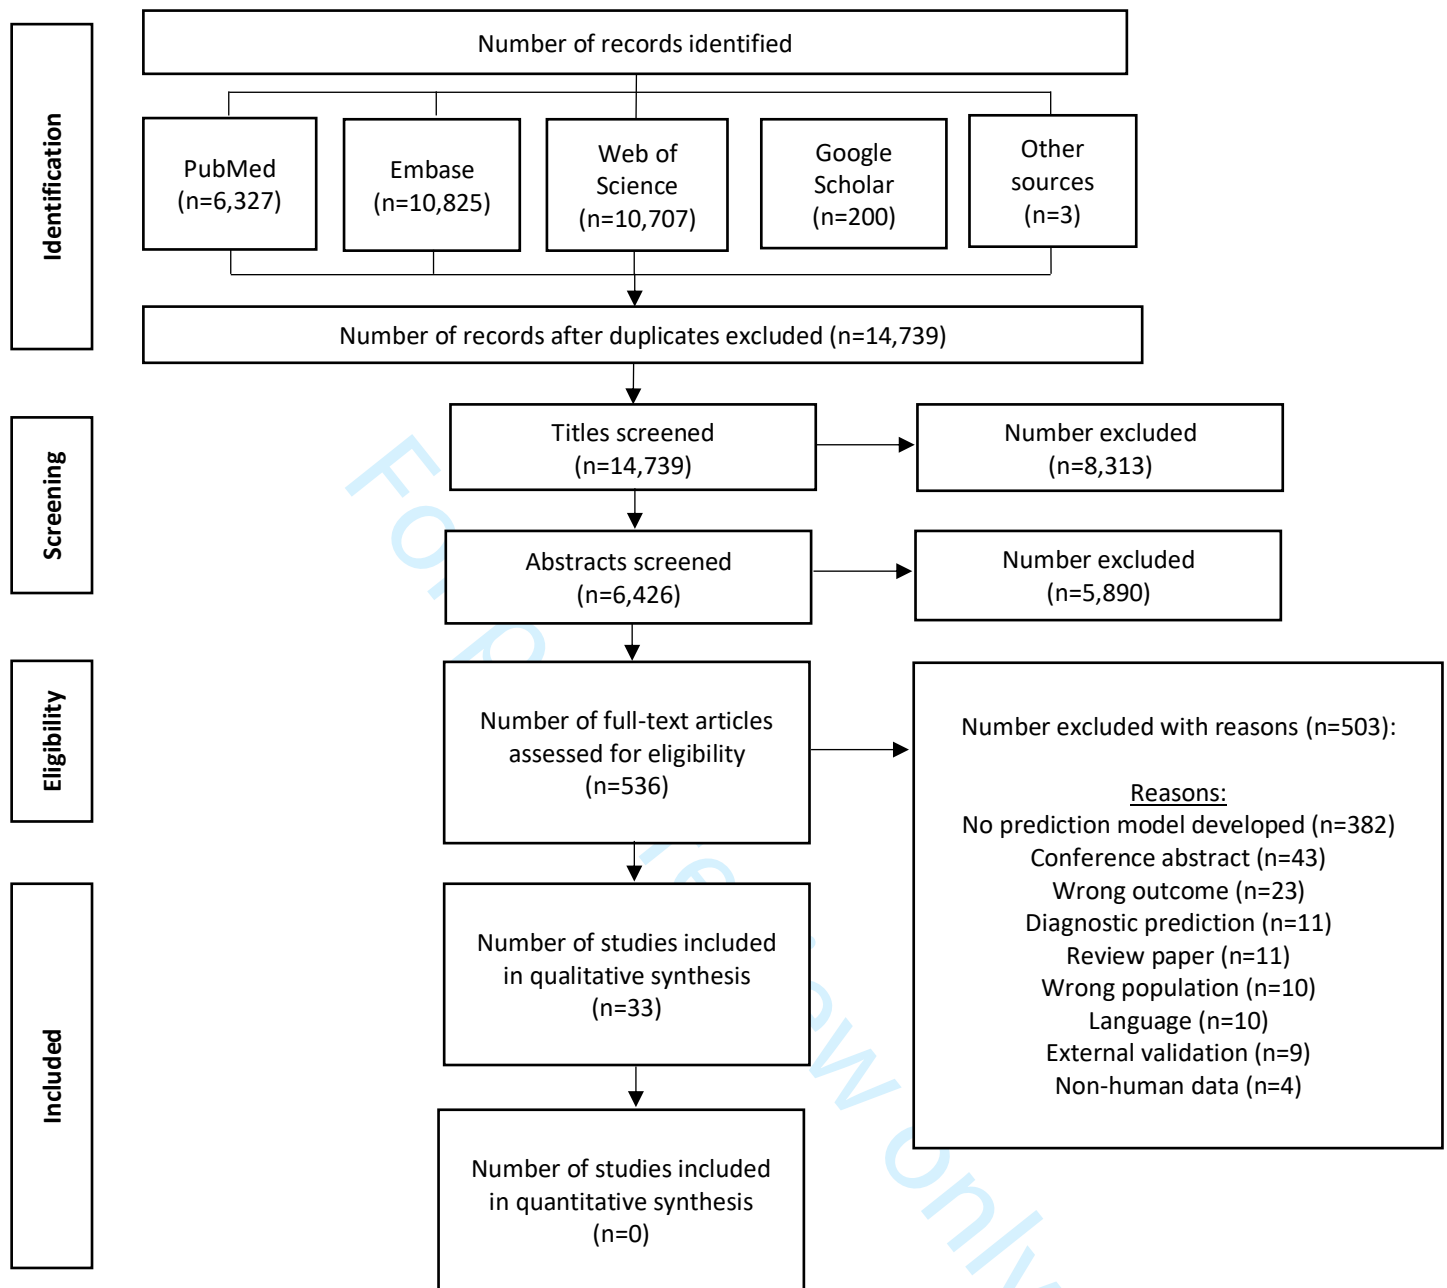

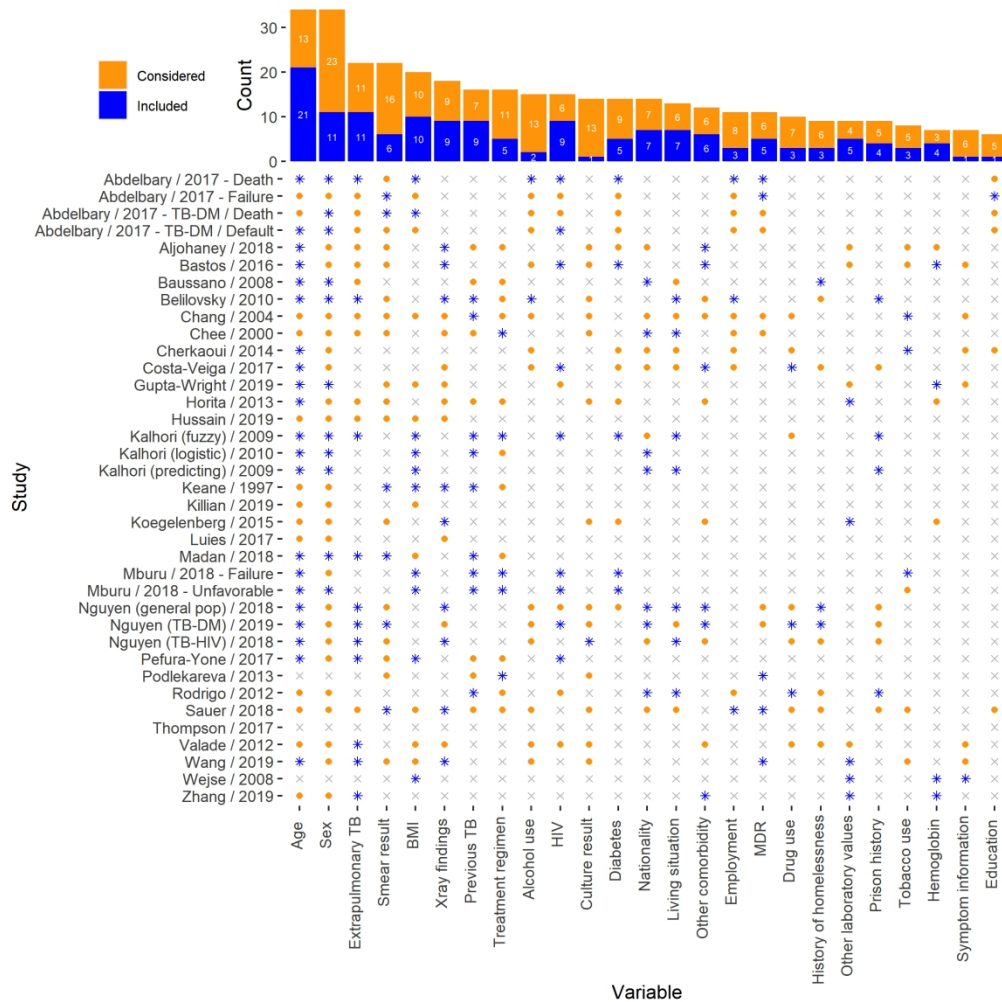

203x203mm (300 x 300 DPI)

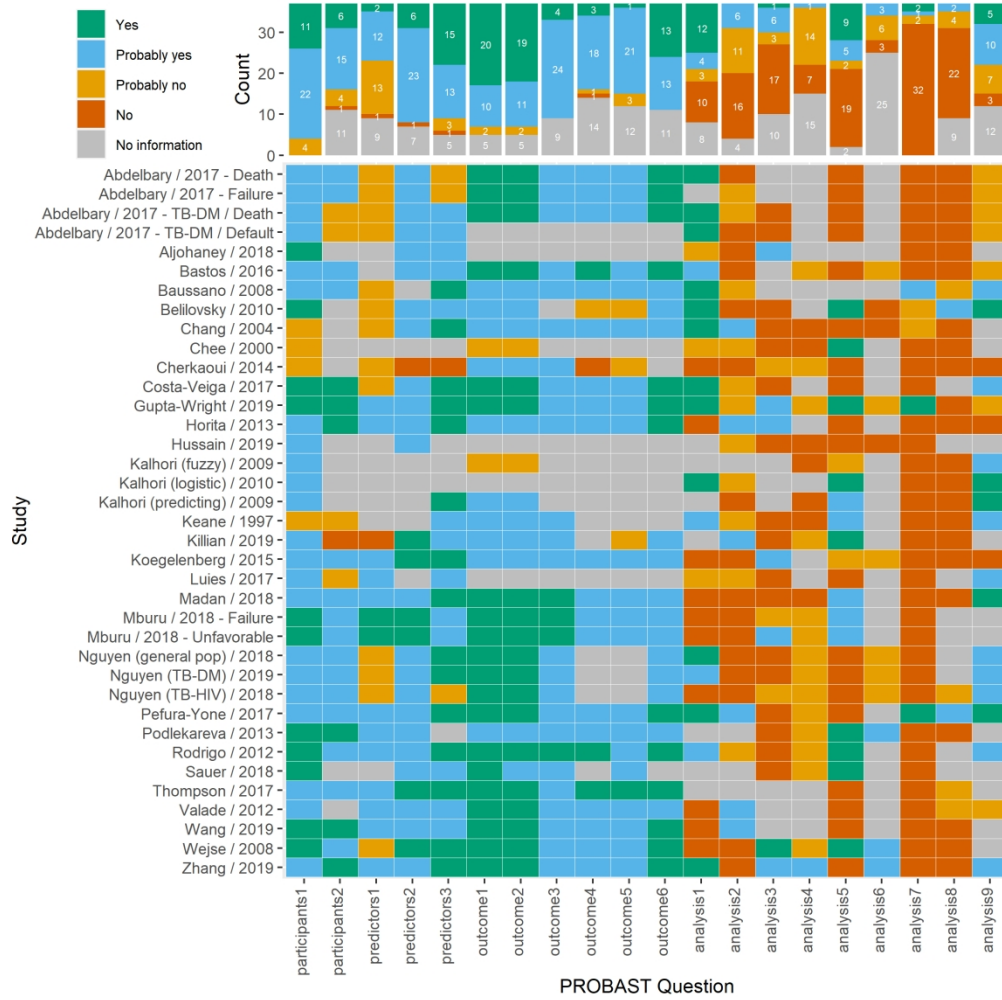

203x203mm (300 x 300 DPI)

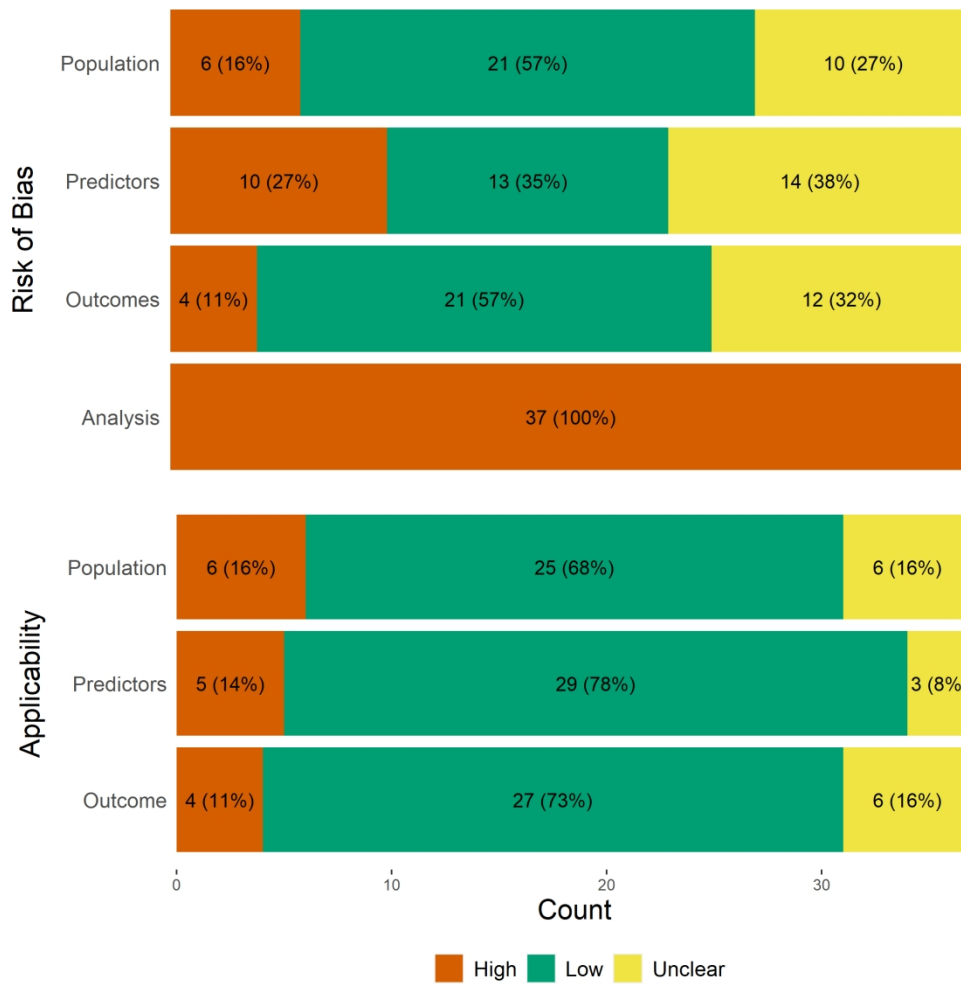

203x203mm (300 x 300 DPI)

## Supplemental File 1. PRISMA Checklist

| Section/topic                      | #  | Checklist item                                                                                                                                                                                                                                                                                              | Reported on page #            |
|------------------------------------|----|-------------------------------------------------------------------------------------------------------------------------------------------------------------------------------------------------------------------------------------------------------------------------------------------------------------|-------------------------------|
| <b>TITLE</b>                       |    |                                                                                                                                                                                                                                                                                                             |                               |
| Title                              | 1  | Identify the report as a systematic review, meta-analysis, or both.                                                                                                                                                                                                                                         | 1                             |
| <b>ABSTRACT</b>                    |    |                                                                                                                                                                                                                                                                                                             |                               |
| Structured summary                 | 2  | Provide a structured summary including, as applicable: background; objectives; data sources; study eligibility criteria, participants, and interventions; study appraisal and synthesis methods; results; limitations; conclusions and implications of key findings; systematic review registration number. | 3                             |
| <b>INTRODUCTION</b>                |    |                                                                                                                                                                                                                                                                                                             |                               |
| Rationale                          | 3  | Describe the rationale for the review in the context of what is already known.                                                                                                                                                                                                                              | 5-6                           |
| Objectives                         | 4  | Provide an explicit statement of questions being addressed with reference to participants, interventions, comparisons, outcomes, and study design (PICOS).                                                                                                                                                  | Supplemental File 2           |
| <b>METHODS</b>                     |    |                                                                                                                                                                                                                                                                                                             |                               |
| Protocol and registration          | 5  | Indicate if a review protocol exists, if and where it can be accessed (e.g., Web address), and, if available, provide registration information including registration number.                                                                                                                               | Abstract and p. 7             |
| Eligibility criteria               | 6  | Specify study characteristics (e.g., PICOS, length of follow-up) and report characteristics (e.g., years considered, language, publication status) used as criteria for eligibility, giving rationale.                                                                                                      | 7-8                           |
| Information sources                | 7  | Describe all information sources (e.g., databases with dates of coverage, contact with study authors to identify additional studies) in the search and date last searched.                                                                                                                                  | 8                             |
| Search                             | 8  | Present full electronic search strategy for at least one database, including any limits used, such that it could be repeated.                                                                                                                                                                               | Supplemental file 3           |
| Study selection                    | 9  | State the process for selecting studies (i.e., screening, eligibility, included in systematic review, and, if applicable, included in the meta-analysis).                                                                                                                                                   | 8-9                           |
| Data collection process            | 10 | Describe method of data extraction from reports (e.g., piloted forms, independently, in duplicate) and any processes for obtaining and confirming data from investigators.                                                                                                                                  | 8-9                           |
| Data items                         | 11 | List and define all variables for which data were sought (e.g., PICOS, funding sources) and any assumptions and simplifications made.                                                                                                                                                                       | 9; Supplemental Files 4 and 5 |
| Risk of bias in individual studies | 12 | Describe methods used for assessing risk of bias of individual studies (including specification of whether this was done at the study or outcome level), and how this information is to be used in any data synthesis.                                                                                      | 9; Supplemental File 5        |
| Summary measures                   | 13 | State the principal summary measures (e.g., risk ratio, difference in means).                                                                                                                                                                                                                               | N/A                           |
| Synthesis of results               | 14 | Describe the methods of handling data and combining results of studies, if done, including measures of consistency (e.g., $I^2$ ) for each meta-analysis.                                                                                                                                                   | 8-9                           |
| Risk of bias across studies        | 15 | Specify any assessment of risk of bias that may affect the cumulative evidence (e.g., publication bias, selective reporting within studies).                                                                                                                                                                | N/A                           |
| Additional analyses                | 16 | Describe methods of additional analyses (e.g., sensitivity or subgroup analyses, meta-regression), if done, indicating which were pre-specified.                                                                                                                                                            | N/A                           |
| <b>RESULTS</b>                     |    |                                                                                                                                                                                                                                                                                                             |                               |
| Study selection                    | 17 | Give numbers of studies screened, assessed for eligibility, and included in the review, with reasons for exclusions at each stage, ideally with a flow diagram.                                                                                                                                             | 11; Figure 1                  |
| Study characteristics              | 18 | For each study, present characteristics for which data were extracted (e.g., study size, PICOS, follow-up period) and provide the citations.                                                                                                                                                                | 11-13; Table 3, 4, 5          |
| Risk of bias within studies        | 19 | Present data on risk of bias of each study and, if available, any outcome level assessment (see item 12).                                                                                                                                                                                                   | 13-14; Figures 3 and 4        |

|                               |    |                                                                                                                                                                                                          |                |
|-------------------------------|----|----------------------------------------------------------------------------------------------------------------------------------------------------------------------------------------------------------|----------------|
| Results of individual studies | 20 | For all outcomes considered (benefits or harms), present, for each study: (a) simple summary data for each intervention group (b) effect estimates and confidence intervals, ideally with a forest plot. | 11-14; Table 2 |
| Synthesis of results          | 21 | Present results of each meta-analysis done, including confidence intervals and measures of consistency.                                                                                                  | N/A            |
| Risk of bias across studies   | 22 | Present results of any assessment of risk of bias across studies (see Item 15).                                                                                                                          | N/A            |
| Additional analysis           | 23 | Give results of additional analyses, if done (e.g., sensitivity or subgroup analyses, meta-regression [see Item 16]).                                                                                    | N/A            |
| <b>DISCUSSION</b>             |    |                                                                                                                                                                                                          |                |
| Summary of evidence           | 24 | Summarize the main findings including the strength of evidence for each main outcome; consider their relevance to key groups (e.g., healthcare providers, users, and policy makers).                     | 15-19          |
| Limitations                   | 25 | Discuss limitations at study and outcome level (e.g., risk of bias), and at review-level (e.g., incomplete retrieval of identified research, reporting bias).                                            | 18             |
| Conclusions                   | 26 | Provide a general interpretation of the results in the context of other evidence, and implications for future research.                                                                                  | 19             |
| <b>FUNDING</b>                |    |                                                                                                                                                                                                          |                |
| Funding                       | 27 | Describe sources of funding for the systematic review and other support (e.g., supply of data); role of funders for the systematic review.                                                               | 21             |

From: Moher D, Liberati A, Tetzlaff J, Altman DG, The PRISMA Group (2009). Preferred Reporting Items for Systematic Reviews and Meta-Analyses: The PRISMA Statement. PLoS Med 6(7): e1000097. doi:10.1371/journal.pmed1000097

**Supplemental File 2. PICOTS System**

|                     |                                                                                                                                                                                                                                                                                                                                                                                                                                                                                                                                                                                                                                                                                      |
|---------------------|--------------------------------------------------------------------------------------------------------------------------------------------------------------------------------------------------------------------------------------------------------------------------------------------------------------------------------------------------------------------------------------------------------------------------------------------------------------------------------------------------------------------------------------------------------------------------------------------------------------------------------------------------------------------------------------|
| <b>Population</b>   | Pulmonary tuberculosis cases                                                                                                                                                                                                                                                                                                                                                                                                                                                                                                                                                                                                                                                         |
| <b>Intervention</b> | Any prognostic model developed to predict tuberculosis treatment outcome. This includes model development studies with and without external validation                                                                                                                                                                                                                                                                                                                                                                                                                                                                                                                               |
| <b>Comparator</b>   | Models will be compared to each other, as there is no other relevant comparator for this systematic review                                                                                                                                                                                                                                                                                                                                                                                                                                                                                                                                                                           |
| <b>Outcome</b>      | TB treatment outcome. The primary outcome of interest is the probability of unsuccessful TB treatment outcome, defined by the WHO as the combination of death, treatment failure, default, and/or not evaluated, as compared to successful TB treatment outcome, defined as the combination of cure and treatment completion. Included studies should evaluate at least one of the following outcomes: cure, treatment completion, death, treatment failure, default, and not evaluated. Default and not evaluated are sometimes referred to collectively as lost to follow-up. Some prediction models will look at only single endpoints, whereas other look at composite outcomes. |
| <b>Timing</b>       | The timespan of prediction may vary between studies, depending on the duration of treatment and follow-up, but we expect most studies will evaluate endpoints around 6-9 months.                                                                                                                                                                                                                                                                                                                                                                                                                                                                                                     |
| <b>Setting</b>      | Model designed for use in clinical or hospital setting at the time of TB treatment initiation to aid in targeted treatment or programmatic support for individuals at greatest risk for unsuccessful TB treatment outcomes.                                                                                                                                                                                                                                                                                                                                                                                                                                                          |

## Supplemental File 3. Search Strategy

| Database              | Search terms                                                                                                                                                                                                                                                                                                                                                                                                                                                                                                                                                                                                                                                                                                                                                                                                                                                                                                                                                                                                                                                                                                                                                                                                                                                                                                                                                                                                                                             |
|-----------------------|----------------------------------------------------------------------------------------------------------------------------------------------------------------------------------------------------------------------------------------------------------------------------------------------------------------------------------------------------------------------------------------------------------------------------------------------------------------------------------------------------------------------------------------------------------------------------------------------------------------------------------------------------------------------------------------------------------------------------------------------------------------------------------------------------------------------------------------------------------------------------------------------------------------------------------------------------------------------------------------------------------------------------------------------------------------------------------------------------------------------------------------------------------------------------------------------------------------------------------------------------------------------------------------------------------------------------------------------------------------------------------------------------------------------------------------------------------|
| <b>PubMed</b>         | <ol style="list-style-type: none"> <li>1. ((validat*[tiab] OR predict*[ti] OR rule*[tiab])<br/>OR (predict*[tiab] AND (outcome*[tiab] OR risk*[tiab] OR model*[tiab]))<br/>OR ((history[tiab] OR variable*[tiab] OR criteria[tiab] OR scor*[tiab] OR characteristic*[tiab] OR finding*[tiab] OR factor*[tiab]) AND (predict*[tiab] OR model*[tiab] OR decision*[tiab] OR identif*[tiab] OR prognos*[tiab]))<br/>OR (decision*[tiab] AND (model*[tiab] OR clinical*[tiab] OR "Logistic Models"[Mesh]))<br/>OR (prognostic[tiab] AND (history[tiab] OR variable*[tiab] OR criteria[tiab] OR scor*[tiab] OR characteristic*[tiab] OR finding*[tiab] OR factor*[tiab] OR model*[tiab]))</li> <li>2. (stratification[tiab] OR "ROC Curve"[Mesh] OR discrimination[tiab] OR discriminate[tiab] OR "c-statistic"[tiab] OR "c statistic"[tiab] OR "area under the curve"[tiab] OR AUC[tiab] OR calibration[tiab] OR indices[tiab] OR algorithm[tiab] OR multivariable[tiab])</li> <li>3. (tuberculosis[Mesh] OR tuberculosis[tiab])</li> <li>4. (outcome*[tiab] OR mortality*[tiab] OR death*[tiab] OR fail*[tiab] OR recur*[tiab] OR relapse*[tiab] OR default*[tiab] OR abandon*[tiab] OR loss*[tiab] OR cure*[tiab] OR success*[tiab] OR unsuccess*[tiab] OR die[tiab] OR died[tiab] OR dies[tiab]))</li> <li>5. 1 OR 2</li> <li>6. 3 AND 4</li> <li>7. 5 AND 6 AND (humans[Filter]) AND ("1995"[Date - Publication] : "3000"[Date - Publication])</li> </ol> |
| <b>Embase</b>         | <ol style="list-style-type: none"> <li>1. (validat\$ or predict\$ or rule\$).ti.<br/>OR (predict\$ and (outcome\$ or risk\$ or model\$)).ti.ab.<br/>OR ((history or variable\$ or criteria or scor\$ or characteristic\$ or finding\$ or factor\$) and (predict\$ or model\$ or decision\$ or identif\$ or prognos\$)).ti.ab.<br/>OR (decision\$.ti.ab. and ((model\$ or clinical\$).ti.ab. or "statistical model"/))<br/>OR (prognostic and (history or variable\$ or criteria or scor\$ or characteristic\$ or finding\$ or factor\$ or model\$)).ti.ab.</li> <li>2. (stratification or discrimination or discriminate or c-statistic or "c statistic" or "area under the curve" or AUC or calibration or indices or algorithm or multivariable).ti.ab. or "receiver operating characteristic"/</li> <li>3. tuberculosis/ or tuberculosis.ti.ab</li> <li>4. (outcome\$ or mortality\$ or death\$ or fail\$ or recur\$ or relapse\$ or default\$ or abandon\$ or loss\$ or cure\$ or success\$ or unsuccess\$ or die or died or dies).ti.ab.</li> <li>5. 1 or 2</li> <li>6. 3 and 4</li> <li>7. 5 and 6</li> <li>8. limit 7 to (human and yr="1995 -Current")</li> </ol>                                                                                                                                                                                                                                                                                |
| <b>Web of Science</b> | <ol style="list-style-type: none"> <li>1. TI=(validat* or predict* or rule*)<br/>OR TS=(predict* and (outcome* or risk* or model*))<br/>OR TS=((history or variable* or criteria or scor* or characteristic* or finding* or factor*) and (predict* or model* or decision* or identif* or prognos*))<br/>OR TS=(decision* and ((model* or clinical*). or "statistical model"))<br/>OR TS=(prognostic and (history or variable* or criteria or scor* or characteristic* or finding* or factor* or model*))</li> <li>2. TS=(stratification or discrimination or discriminate or c-statistic or "c statistic" or "area under the curve" or AUC or calibration or indices or algorithm or multivariable or "receiver operating characteristic")</li> <li>3. TS=(tuberculosis)</li> <li>4. TS=(outcome* or mortality* or death* or fail* or recur* or relapse* or default* or abandon* or loss* or cure* or success* or unsuccess* or die or died or dies)</li> <li>5. 1 or 2</li> <li>6. 3 and 4</li> <li>7. 5 and 6; IC Timespan=1995-2019</li> </ol>                                                                                                                                                                                                                                                                                                                                                                                                        |
| <b>Google scholar</b> | tuberculosis treatment outcome prediction prognostic model development validation                                                                                                                                                                                                                                                                                                                                                                                                                                                                                                                                                                                                                                                                                                                                                                                                                                                                                                                                                                                                                                                                                                                                                                                                                                                                                                                                                                        |



## Supplemental File 4. CHARMS Checklist

| Domain                                       | Key items                                                                                                                                                                                                                                                         | Reported on page # |
|----------------------------------------------|-------------------------------------------------------------------------------------------------------------------------------------------------------------------------------------------------------------------------------------------------------------------|--------------------|
| <b>SOURCE OF DATA</b>                        | Source of data (e.g., cohort, case-control, randomized trial participants, or registry data)                                                                                                                                                                      |                    |
| <b>PARTICIPANTS</b>                          | Participant eligibility and recruitment method (e.g., consecutive participants, location, number of centers, setting, inclusion and exclusion criteria)                                                                                                           |                    |
|                                              | Participant description                                                                                                                                                                                                                                           |                    |
|                                              | Details of treatments received, if relevant                                                                                                                                                                                                                       |                    |
|                                              | Study dates                                                                                                                                                                                                                                                       |                    |
| <b>OUTCOME(S) TO BE PREDICTED</b>            | Definition and method for measurement of outcome                                                                                                                                                                                                                  |                    |
|                                              | Was the same outcome definition (and method for measurement) used in all patients?                                                                                                                                                                                |                    |
|                                              | Type of outcome (e.g., single or combined endpoints)                                                                                                                                                                                                              |                    |
|                                              | Was the outcome assessed without knowledge of the candidate predictors (i.e., blinded)?                                                                                                                                                                           |                    |
|                                              | Were candidate predictors part of the outcome (e.g., in panel or consensus diagnosis)?                                                                                                                                                                            |                    |
|                                              | Time of outcome occurrence or summary of duration of follow-up                                                                                                                                                                                                    |                    |
| <b>CANDIDATE PREDICTORS (OR INDEX TESTS)</b> | Number and type of predictors (e.g., demographics, patient history, physical examination, additional testing, disease characteristics)                                                                                                                            |                    |
|                                              | Definition and method for measurement of candidate predictors                                                                                                                                                                                                     |                    |
|                                              | Timing of predictor measurement (e.g., at patient presentation, at diagnosis, at treatment initiation)                                                                                                                                                            |                    |
|                                              | Were predictors assessed blinded for outcome, and for each other (if relevant)?                                                                                                                                                                                   |                    |
|                                              | Handling of predictors in the modelling (e.g., continuous, linear, non-linear transformations or categorised)                                                                                                                                                     |                    |
| <b>SAMPLE SIZE</b>                           | Number of participants and number of outcomes/events                                                                                                                                                                                                              |                    |
|                                              | Number of outcomes/events in relation to the number of candidate predictors (Events Per Variable)                                                                                                                                                                 |                    |
| <b>MISSING DATA</b>                          | Number of participants with any missing value (include predictors and outcomes)                                                                                                                                                                                   |                    |
|                                              | Number of participants with missing data for each predictor                                                                                                                                                                                                       |                    |
|                                              | Handling of missing data (e.g., complete-case analysis, imputation, or other methods)                                                                                                                                                                             |                    |
| <b>MODEL DEVELOPMENT</b>                     | Modelling method (e.g., logistic, survival, neural network, or machine learning techniques)                                                                                                                                                                       |                    |
|                                              | Modelling assumptions satisfied                                                                                                                                                                                                                                   |                    |
|                                              | Method for selection of predictors <b>for inclusion</b> in multivariable modelling (e.g., all candidate predictors, pre-selection based on unadjusted association with the outcome)                                                                               |                    |
|                                              | Method for selection of predictors <b>during multivariable modelling</b> (e.g., full model approach, backward or forward selection) and criteria used (e.g., p-value, Akaike Information Criterion)                                                               |                    |
|                                              | Shrinkage of predictor weights or regression coefficients (e.g., no shrinkage, uniform shrinkage, penalized estimation)                                                                                                                                           |                    |
| <b>MODEL PERFORMANCE</b>                     | Calibration (calibration plot, calibration slope, Hosmer-Lemeshow test) and Discrimination (C-statistic, D-statistic, log-rank) measures with confidence intervals                                                                                                |                    |
|                                              | Classification measures (e.g., sensitivity, specificity, predictive values, net reclassification improvement) and whether a-priori cut points were used                                                                                                           |                    |
| <b>MODEL EVALUATION</b>                      | Method used for testing model performance: development dataset only (random split of data, resampling methods e.g. bootstrap or cross-validation, none) or separate external validation (e.g. temporal, geographical, different setting, different investigators) |                    |
|                                              | In case of poor validation, whether model was adjusted or updated (e.g., intercept recalibrated, predictor effects adjusted, or new predictors added)                                                                                                             |                    |
| <b>RESULTS</b>                               | Final and other multivariable models (e.g., basic, extended, simplified) presented, including predictor weights or regression coefficients, intercept, baseline survival, model performance measures (with standard errors or confidence intervals)               |                    |
|                                              | Any alternative presentation of the final prediction models, e.g., sum score, nomogram, score chart, predictions for specific risk subgroups with performance                                                                                                     |                    |

|    |                                          |                                                                                                                                   |  |
|----|------------------------------------------|-----------------------------------------------------------------------------------------------------------------------------------|--|
| 1  |                                          | Comparison of the distribution of predictors (including missing data) for development and validation datasets                     |  |
| 2  | <b>INTERPRETATION<br/>AND DISCUSSION</b> | Interpretation of presented models (confirmatory, i.e., model useful for practice versus exploratory, i.e., more research needed) |  |
| 3  |                                          | Comparison with other studies, discussion of generalizability, strengths and limitations.                                         |  |
| 4  |                                          |                                                                                                                                   |  |
| 5  |                                          |                                                                                                                                   |  |
| 6  |                                          |                                                                                                                                   |  |
| 7  |                                          |                                                                                                                                   |  |
| 8  |                                          |                                                                                                                                   |  |
| 9  |                                          |                                                                                                                                   |  |
| 10 |                                          |                                                                                                                                   |  |
| 11 |                                          |                                                                                                                                   |  |
| 12 |                                          |                                                                                                                                   |  |
| 13 |                                          |                                                                                                                                   |  |
| 14 |                                          |                                                                                                                                   |  |
| 15 |                                          |                                                                                                                                   |  |
| 16 |                                          |                                                                                                                                   |  |
| 17 |                                          |                                                                                                                                   |  |
| 18 |                                          |                                                                                                                                   |  |
| 19 |                                          |                                                                                                                                   |  |
| 20 |                                          |                                                                                                                                   |  |
| 21 |                                          |                                                                                                                                   |  |
| 22 |                                          |                                                                                                                                   |  |
| 23 |                                          |                                                                                                                                   |  |
| 24 |                                          |                                                                                                                                   |  |
| 25 |                                          |                                                                                                                                   |  |
| 26 |                                          |                                                                                                                                   |  |
| 27 |                                          |                                                                                                                                   |  |
| 28 |                                          |                                                                                                                                   |  |
| 29 |                                          |                                                                                                                                   |  |
| 30 |                                          |                                                                                                                                   |  |
| 31 |                                          |                                                                                                                                   |  |
| 32 |                                          |                                                                                                                                   |  |
| 33 |                                          |                                                                                                                                   |  |
| 34 |                                          |                                                                                                                                   |  |
| 35 |                                          |                                                                                                                                   |  |
| 36 |                                          |                                                                                                                                   |  |
| 37 |                                          |                                                                                                                                   |  |
| 38 |                                          |                                                                                                                                   |  |
| 39 |                                          |                                                                                                                                   |  |
| 40 |                                          |                                                                                                                                   |  |
| 41 |                                          |                                                                                                                                   |  |
| 42 |                                          |                                                                                                                                   |  |
| 43 |                                          |                                                                                                                                   |  |
| 44 |                                          |                                                                                                                                   |  |
| 45 |                                          |                                                                                                                                   |  |
| 46 |                                          |                                                                                                                                   |  |
| 47 |                                          |                                                                                                                                   |  |
| 48 |                                          |                                                                                                                                   |  |
| 49 |                                          |                                                                                                                                   |  |
| 50 |                                          |                                                                                                                                   |  |
| 51 |                                          |                                                                                                                                   |  |
| 52 |                                          |                                                                                                                                   |  |
| 53 |                                          |                                                                                                                                   |  |
| 54 |                                          |                                                                                                                                   |  |
| 55 |                                          |                                                                                                                                   |  |
| 56 |                                          |                                                                                                                                   |  |
| 57 |                                          |                                                                                                                                   |  |
| 58 |                                          |                                                                                                                                   |  |
| 59 |                                          |                                                                                                                                   |  |
| 60 |                                          |                                                                                                                                   |  |

For peer review only

## Supplemental File 5. Prediction model Risk Of Bias Assessment Tool (PROBAST)

[Link](#) to full explanation and elaboration document

Citation: Moons KG, Wolff RF, Riley RD, et al. PROBAST: A Tool to Assess Risk of Bias and Applicability of Prediction Model Studies: Explanation and Elaboration. *Ann Intern Med.* 2019;170:W1–W33. doi: <https://doi.org/10.7326/M18-1377>

| <b>Domain 1: Participants</b>                                                                                                                                                                                                                                                                                             |                                                        |                                                                                                                                                                                                                                                                                                                                                                                                         |                                                                                                                                                                                                                                                                                                                                                                                                                                                                                                                                                 |                                                                                                                                                               |
|---------------------------------------------------------------------------------------------------------------------------------------------------------------------------------------------------------------------------------------------------------------------------------------------------------------------------|--------------------------------------------------------|---------------------------------------------------------------------------------------------------------------------------------------------------------------------------------------------------------------------------------------------------------------------------------------------------------------------------------------------------------------------------------------------------------|-------------------------------------------------------------------------------------------------------------------------------------------------------------------------------------------------------------------------------------------------------------------------------------------------------------------------------------------------------------------------------------------------------------------------------------------------------------------------------------------------------------------------------------------------|---------------------------------------------------------------------------------------------------------------------------------------------------------------|
| The overall aim for prediction models is to generate absolute risk predictions that are correct in new individuals. Certain data sources or designs are not suited to generate absolute probabilities. Problems may also arise if a study inappropriately includes or excludes participant groups from entering the study |                                                        |                                                                                                                                                                                                                                                                                                                                                                                                         |                                                                                                                                                                                                                                                                                                                                                                                                                                                                                                                                                 |                                                                                                                                                               |
|                                                                                                                                                                                                                                                                                                                           | <u>Signaling question</u>                              | <u>Yes/probably yes</u>                                                                                                                                                                                                                                                                                                                                                                                 | <u>No/probably no</u>                                                                                                                                                                                                                                                                                                                                                                                                                                                                                                                           | <u>No information</u>                                                                                                                                         |
| 1                                                                                                                                                                                                                                                                                                                         | What study design was used and was it appropriate?     | Yes: If a cohort design (including RCT or proper registry data) was used and you have confidence in data quality and participant enrollment is clearly described<br><br>Probably yes: a nested case-control or case-cohort design (with proper adjustment of the baseline risk/hazard in the analysis) has been used or a cohort design was used but participant enrollment was data quality is unclear | No: If a non-nested case-control design has been used<br><br>Probably no: a nested case-control study was used without proper adjustment of baseline risk/hazard                                                                                                                                                                                                                                                                                                                                                                                | If the method of participant sampling is unclear.                                                                                                             |
| 2                                                                                                                                                                                                                                                                                                                         | Were all inclusion and exclusion criteria appropriate? | Yes: Inclusion and exclusion are clear and selection participants was appropriate, so participants correspond to unselected participants of interest (i.e. the target population).<br><br>Probably yes: Inclusion and exclusion criteria are not entirely clear, but it seems like the population is representative of the target population                                                            | No: If participants are included who would already have been identified as having the outcome and so are no longer at risk of developing outcome, or if specific subgroups are excluded that may have altered the performance of the prediction model for the intended target population.<br><br>Probably no: inclusion and exclusion criteria are unclear and it seems possible that there was bias in selection of participants that could lead to the model being applied to a population that is unrepresentative of the target population. | When there is no information on whether inappropriate inclusions or exclusions took place.                                                                    |
| <b>Low risk of bias</b>                                                                                                                                                                                                                                                                                                   |                                                        | <b>High risk of bias</b>                                                                                                                                                                                                                                                                                                                                                                                |                                                                                                                                                                                                                                                                                                                                                                                                                                                                                                                                                 | <b>Unclear risk of bias</b>                                                                                                                                   |
| If the answer to all signaling questions is “Yes” or “Probably yes,” then risk of bias can be considered low. If $\geq 1$ of the answers is “No” or “Probably no,” the judgment could still be “Low risk of bias” but specific reasons should be provided why the risk of bias can be considered low.                     |                                                        | If the answer to any of the signaling questions is “No” or “Probably no,” there is a potential for bias, except if defined at low risk of bias above.                                                                                                                                                                                                                                                   |                                                                                                                                                                                                                                                                                                                                                                                                                                                                                                                                                 | If relevant information is missing for some of the signaling questions and none of the signaling questions is judged to put this domain at high risk of bias. |

| <b>Domain 2: Predictors</b>                                                                                                                                                                                                                                                                                                           |                                                                             |                                                                                                                                                                                                                                                                                                                                                                          |                                                                                                                                                                                                                                                                                                                                                                                                     |                                                                                              |
|---------------------------------------------------------------------------------------------------------------------------------------------------------------------------------------------------------------------------------------------------------------------------------------------------------------------------------------|-----------------------------------------------------------------------------|--------------------------------------------------------------------------------------------------------------------------------------------------------------------------------------------------------------------------------------------------------------------------------------------------------------------------------------------------------------------------|-----------------------------------------------------------------------------------------------------------------------------------------------------------------------------------------------------------------------------------------------------------------------------------------------------------------------------------------------------------------------------------------------------|----------------------------------------------------------------------------------------------|
| Bias in model performance can occur when the definition and measurement of predictors is flawed. Predictors are the variables evaluated for their association with the outcome of interest. Bias can occur, for example, when predictors are not defined in a similar way for all participants or knowledge of the outcome influences |                                                                             |                                                                                                                                                                                                                                                                                                                                                                          |                                                                                                                                                                                                                                                                                                                                                                                                     |                                                                                              |
|                                                                                                                                                                                                                                                                                                                                       | <u>Signaling question</u>                                                   | <u>Yes/probably yes</u>                                                                                                                                                                                                                                                                                                                                                  | <u>No/probably no</u>                                                                                                                                                                                                                                                                                                                                                                               | <u>No information</u>                                                                        |
| 1                                                                                                                                                                                                                                                                                                                                     | Were predictors defined and assessed in a similar way for all participants? | Yes: It is clear that definitions of predictors and their assessment were similar for all participants.<br><br>Probably yes: Some predictors were based off subjective judgement, but carried out by persons with the necessary skills to evaluate the predictor, or if data from multiple sources was used but predictor definitions were standardized between sources. | No: If different definitions were used for the same predictor or if predictors requiring subjective interpretation were assessed by differently experienced assessors<br><br>Probably no: Data from multiple sources was used and its unclear whether definitions were standardized between sources or if subjective measurements were likely not carried out by persons with appropriate training. | If there is no information on how predictors were defined or assessed.                       |
| 2                                                                                                                                                                                                                                                                                                                                     | Were predictor assessments made without knowledge of data outcome?          | Yes: If outcome information was stated as not used during predictor assessment or was clearly not (yet) available to those assessing predictors (i.e. prospective data collection).                                                                                                                                                                                      | If it is clear that outcome information was used when assessing predictors.                                                                                                                                                                                                                                                                                                                         | No information on whether predictors were assessed without knowledge of outcome information. |

|                                                                                                                                                                                                                                                                                                       |                                                                             |                                                                                                                                                                           |                                                                                                |                                                                                                                                                               |
|-------------------------------------------------------------------------------------------------------------------------------------------------------------------------------------------------------------------------------------------------------------------------------------------------------|-----------------------------------------------------------------------------|---------------------------------------------------------------------------------------------------------------------------------------------------------------------------|------------------------------------------------------------------------------------------------|---------------------------------------------------------------------------------------------------------------------------------------------------------------|
|                                                                                                                                                                                                                                                                                                       |                                                                             | Probably yes: If it is likely that outcome information was not used during predictor assessment, but not entirely clear (retrospective data collection/surveillance data) |                                                                                                |                                                                                                                                                               |
| 3                                                                                                                                                                                                                                                                                                     | Are all predictors available at the time the model was intended to be used? | All included predictors would be available at the time the model is intended to be used for prediction                                                                    | Predictors would not be available at the time the model is intended to be used for prediction. | No information on whether predictors would be available at the time the model is intended to be used for prediction.                                          |
| <b>Low risk of bias</b>                                                                                                                                                                                                                                                                               |                                                                             | <b>High risk of bias</b>                                                                                                                                                  |                                                                                                | <b>Unclear risk of bias</b>                                                                                                                                   |
| If the answer to all signaling questions is “Yes” or “Probably yes,” then risk of bias can be considered low. If $\geq 1$ of the answers is “No” or “Probably no,” the judgment could still be “Low risk of bias” but specific reasons should be provided why the risk of bias can be considered low. |                                                                             | If the answer to any of the signaling questions is “No” or “Probably no,” there is a potential for bias, except if defined at low risk of bias above.                     |                                                                                                | If relevant information is missing for some of the signaling questions and none of the signaling questions is judged to put this domain at high risk of bias. |

| <b>Domain 3: Outcome</b>                                                                                                                                                                                                                                                                                                                                                                                                                                                                                                     |                                                                               |                                                                                                                                                                                                                                                                                                                                                                                                                                                                                   |                                                                                                                                                                                                                                                                                                                                                            |                                                                                                     |
|------------------------------------------------------------------------------------------------------------------------------------------------------------------------------------------------------------------------------------------------------------------------------------------------------------------------------------------------------------------------------------------------------------------------------------------------------------------------------------------------------------------------------|-------------------------------------------------------------------------------|-----------------------------------------------------------------------------------------------------------------------------------------------------------------------------------------------------------------------------------------------------------------------------------------------------------------------------------------------------------------------------------------------------------------------------------------------------------------------------------|------------------------------------------------------------------------------------------------------------------------------------------------------------------------------------------------------------------------------------------------------------------------------------------------------------------------------------------------------------|-----------------------------------------------------------------------------------------------------|
| Bias in model performance can occur when methods used to determine outcomes incorrectly classify participants with or without the outcome. Bias in methods of outcome determination can result from use of suboptimal methods, tests, or criteria that lead to unacceptably high levels of errors in outcome determination, when methods are inconsistently applied across participants, or when knowledge of predictors influence outcome determination. Incorrect timing of outcome determination can also result in bias. |                                                                               |                                                                                                                                                                                                                                                                                                                                                                                                                                                                                   |                                                                                                                                                                                                                                                                                                                                                            |                                                                                                     |
|                                                                                                                                                                                                                                                                                                                                                                                                                                                                                                                              | <b>Signaling question</b>                                                     | <b>Yes/probably yes</b>                                                                                                                                                                                                                                                                                                                                                                                                                                                           | <b>No/probably no</b>                                                                                                                                                                                                                                                                                                                                      | <b>No information</b>                                                                               |
| 1                                                                                                                                                                                                                                                                                                                                                                                                                                                                                                                            | Was the outcome determined appropriately?                                     | If a method of outcome determination has been used which is considered optimal or acceptable by guidelines or previous publications on the topic<br>Note: This is about level of measurement error within the method of determining the outcome (see concerns for applicability about whether the definition of the outcome method is appropriate).                                                                                                                               | If a clearly suboptimal method has been used that causes unacceptable error in determining outcome status in participants                                                                                                                                                                                                                                  | No information on how outcome was determined                                                        |
| 2                                                                                                                                                                                                                                                                                                                                                                                                                                                                                                                            | Was the outcome pre-specified or standard?                                    | Yes: If the method of outcome determination is objective, or if a standard outcome definition is used, or if prespecified categories are used to group outcomes. (i.e. outcome assessment is based on previously published studies, published study protocol, or clinical guidelines)<br><br>Probably yes: The outcome determination is not clearly based on guidelines or previous research, but outcome assessment is objective and would not inadvertently alter study results | No: If the outcome definition was not standard and not prespecified<br><br>Probably no: a non-standard or non-prespecified outcome was used, and it is unclear whether the outcome definition could introduce bias.<br><br>*Caution with composite outcomes that favor a better model by excluding typical outcome components or including atypical events | No information on whether the outcome definition was prespecified or standard                       |
| 3                                                                                                                                                                                                                                                                                                                                                                                                                                                                                                                            | Were predictors excluded from outcome definition?                             | Yes: None of the predictors are included in the outcome definition (clearly stated)<br><br>Probably yes: None of the predictors are included in the outcome definition (assumed)                                                                                                                                                                                                                                                                                                  | If $\geq 1$ of the predictors forms part of the outcome definition                                                                                                                                                                                                                                                                                         | No information on whether predictors are excluded from the outcome definition                       |
| 4                                                                                                                                                                                                                                                                                                                                                                                                                                                                                                                            | Was the outcome defined and determined in a similar way for all participants? | Yes: If outcomes were defined and determined in a similar way for all participants (clearly stated)<br><br>Probably yes: If outcomes were defined and determined in a similar way for all participants (assumed)                                                                                                                                                                                                                                                                  | If outcomes were clearly defined and determined in a different way for some participants                                                                                                                                                                                                                                                                   | No information on whether outcomes were defined or determined in a similar way for all participants |
| 5                                                                                                                                                                                                                                                                                                                                                                                                                                                                                                                            | Was the outcome determined without predictor information                      | Yes: If predictor information was not known when determining the outcome status, or outcome status determination is clearly reported as determined without knowledge of predictor information.<br><br>Probably yes: predictor information might have been available at time of outcome assessment, but outcome definition is objective and knowing information about predictors would not influence outcome                                                                       | No: If it is clear that predictor information was used when determining the outcome status<br><br>Probably no: it is likely predictor information was available at the time of outcome assessment, and outcome definition is subjective and knowledge of predictors could influence outcome determination.                                                 | No information on whether outcome was determined without knowledge of predictor information         |

|   |                                                                                          |                                                                                                                                                                                                                                                                                                                                                                                                                                  |                                                                                                                                                                                                |                                                                                                                                                               |
|---|------------------------------------------------------------------------------------------|----------------------------------------------------------------------------------------------------------------------------------------------------------------------------------------------------------------------------------------------------------------------------------------------------------------------------------------------------------------------------------------------------------------------------------|------------------------------------------------------------------------------------------------------------------------------------------------------------------------------------------------|---------------------------------------------------------------------------------------------------------------------------------------------------------------|
|   |                                                                                          | assessment (i.e. death, treatment failure based on culture results, etc)                                                                                                                                                                                                                                                                                                                                                         |                                                                                                                                                                                                |                                                                                                                                                               |
| 6 | Was the time interval between predictor assessment and outcome determination appropriate | If the time interval between predictor assessment and outcome determination was appropriate to enable the correct type and representative number of relevant outcomes to be recorded, or if no information on the time interval is required to allow a representative number of the relevant outcome occur or if predictor assessment and outcome determination were from information taken within an appropriate time interval. | If the time interval between predictor assessment and outcome determination is too short or too long to enable the correct type and representative number of relevant outcomes to be recorded. | If no information was provided on the time interval between predictor assessment and outcome determination.                                                   |
|   |                                                                                          | <b>Low risk of bias</b>                                                                                                                                                                                                                                                                                                                                                                                                          | <b>High risk of bias</b>                                                                                                                                                                       | <b>Unclear risk of bias</b>                                                                                                                                   |
|   |                                                                                          | If the answer to all signaling questions is “Yes” or “Probably yes,” then risk of bias can be considered low. If $\geq 1$ of the answers is “No” or “Probably no,” the judgment could still be “Low risk of bias” but specific reasons should be provided why the risk of bias can be considered low.                                                                                                                            | If the answer to any of the signaling questions is “No” or “Probably no,” there is a potential for bias, except if defined at low risk of bias above.                                          | If relevant information is missing for some of the signaling questions and none of the signaling questions is judged to put this domain at high risk of bias. |

| <b>Domain 4: Analysis</b>                                                                                                                                                                                                                                                                                                                                                    |                                                                   |                                                                                                                                                                                                                                                                                                                                                                                                                                                                                                                                                                                                                                                                                                       |                                                                                                                                                                                                                                                                                                                                                                                                                                                                                                                                                                              |                                                                                                                                                                                                                                                                                                                                    |
|------------------------------------------------------------------------------------------------------------------------------------------------------------------------------------------------------------------------------------------------------------------------------------------------------------------------------------------------------------------------------|-------------------------------------------------------------------|-------------------------------------------------------------------------------------------------------------------------------------------------------------------------------------------------------------------------------------------------------------------------------------------------------------------------------------------------------------------------------------------------------------------------------------------------------------------------------------------------------------------------------------------------------------------------------------------------------------------------------------------------------------------------------------------------------|------------------------------------------------------------------------------------------------------------------------------------------------------------------------------------------------------------------------------------------------------------------------------------------------------------------------------------------------------------------------------------------------------------------------------------------------------------------------------------------------------------------------------------------------------------------------------|------------------------------------------------------------------------------------------------------------------------------------------------------------------------------------------------------------------------------------------------------------------------------------------------------------------------------------|
| Statistical analysis is a critical part of prediction model development and validation. The use of inappropriate statistical analysis methods increases the potential for bias in reported model performance measures. Model development studies include many steps where flawed methods can distort results. We recommend reviewers seek statistical advice when completing |                                                                   |                                                                                                                                                                                                                                                                                                                                                                                                                                                                                                                                                                                                                                                                                                       |                                                                                                                                                                                                                                                                                                                                                                                                                                                                                                                                                                              |                                                                                                                                                                                                                                                                                                                                    |
|                                                                                                                                                                                                                                                                                                                                                                              | <b>Signaling question</b>                                         | <b>Yes/probably yes</b>                                                                                                                                                                                                                                                                                                                                                                                                                                                                                                                                                                                                                                                                               | <b>No/probably no</b>                                                                                                                                                                                                                                                                                                                                                                                                                                                                                                                                                        | <b>No information</b>                                                                                                                                                                                                                                                                                                              |
| 1                                                                                                                                                                                                                                                                                                                                                                            | Were there a reasonable number of participants with the outcome?  | For model development studies, if the number of participants with the outcome relative to the number of candidate predictor parameters is $\geq 20$ (EPV $\geq 20$ ).*<br><br>For model validation studies, if the number of participants with the outcome is $\geq 100$ .                                                                                                                                                                                                                                                                                                                                                                                                                            | For model development studies, if the number of participants with the outcome relative to the number of candidate predictor parameters is $< 10$ (EPV $< 10$ ).*<br><br>For model validation studies, if the number of participants with the outcome is $< 100$ .                                                                                                                                                                                                                                                                                                            | For model development studies, no information on the number of candidate predictor parameters or number of participants with the outcome, such that the EPV cannot be calculated.<br><br>For model validation studies, no information on the number of participants with the outcome.                                              |
|                                                                                                                                                                                                                                                                                                                                                                              |                                                                   | * For EPVs between 10 and 20, the item should be rated as either probably yes or probably no, depending on the outcome frequency, overall model performance, and distribution of the predictors in the model. For more guidance, see references 145 to 147.                                                                                                                                                                                                                                                                                                                                                                                                                                           |                                                                                                                                                                                                                                                                                                                                                                                                                                                                                                                                                                              |                                                                                                                                                                                                                                                                                                                                    |
| 2                                                                                                                                                                                                                                                                                                                                                                            | Were continuous and categorical predictors handled appropriately? | Yes: If continuous predictors are kept as continuous or if continuous predictors are examined as linear or non-linear using restricted cubic splines or fractional polynomials.<br><br>Probably yes: If continuous predictors are not converted into $> 2$ categories when included in the model (i.e., dichotomized or categorized) using a prespecified method or in a way that avoids sparse data/would not intentionally improve statistical significance.<br><br>For model validation studies, if continuous predictors are included using the same definitions or transformations, and categorical variables are categorized using the same cut points, as compared with the development study. | No: For model development studies, if continuous predictors are converted into 2 categories when included in the model.<br><br>Probably no: If categorical predictor group definitions do not use a prespecified method or continuous variables were split into $> 2$ groups, but the decision of how to split variables is unclear.<br><br>For model validation studies, if continuous predictors are included using different definitions or transformations, or categorical variables are categorized using different cut points, as compared with the development study. | No information on whether continuous predictors are examined for nonlinearity and no information on how categorical predictor groups are defined.<br><br>For model validation studies, no information on whether the same definitions or transformations and the same cut points are used, as compared with the development study. |
| 3                                                                                                                                                                                                                                                                                                                                                                            | Were all enrolled participants included in the analysis?          | If all participants enrolled in the study are included in the data analysis.                                                                                                                                                                                                                                                                                                                                                                                                                                                                                                                                                                                                                          | If some or a subgroup of participants are inappropriately excluded from the analysis (because they were missing data, unknown outcome, outliers)                                                                                                                                                                                                                                                                                                                                                                                                                             | No information on whether all enrolled participants are included in the analysis.                                                                                                                                                                                                                                                  |
| 4                                                                                                                                                                                                                                                                                                                                                                            | Were participants with missing data handled appropriately?        | Yes: If there are no missing values of predictors or outcomes and the study explicitly reports that participants are not excluded on the basis of missing data, or if missing values are handled using multiple imputation.                                                                                                                                                                                                                                                                                                                                                                                                                                                                           | No: If participants with missing data are omitted from the analysis, or if the method of handling missing data is clearly flawed, e.g., missing indicator method or inappropriate use of last value carried forward, or                                                                                                                                                                                                                                                                                                                                                      | If there is insufficient information to determine if the method of handling missing data is appropriate                                                                                                                                                                                                                            |

|   |                                                                                                                                 |                                                                                                                                                                                                                                                                                                                                                                                                                                                                                              |                                                                                                                                                                                                                                                                                                                                                                                                                                                                                        |                                                                                                                                                                                                                                                                                                                                                                     |
|---|---------------------------------------------------------------------------------------------------------------------------------|----------------------------------------------------------------------------------------------------------------------------------------------------------------------------------------------------------------------------------------------------------------------------------------------------------------------------------------------------------------------------------------------------------------------------------------------------------------------------------------------|----------------------------------------------------------------------------------------------------------------------------------------------------------------------------------------------------------------------------------------------------------------------------------------------------------------------------------------------------------------------------------------------------------------------------------------------------------------------------------------|---------------------------------------------------------------------------------------------------------------------------------------------------------------------------------------------------------------------------------------------------------------------------------------------------------------------------------------------------------------------|
|   |                                                                                                                                 | Probably yes: If a small percentage of persons with missing data were excluded and authors provide comparison of included vs. excluded participants or if sensitivity analysis with imputation methods are convincing that bias is low                                                                                                                                                                                                                                                       | if the study had no explicit mention of methods to handle missing data.<br><br>Probably no: If authors provide comparison of included vs. excluded participants or if sensitivity analysis with imputation methods are reported, but the results are not convincing to rule out bias from excluding missing data                                                                                                                                                                       |                                                                                                                                                                                                                                                                                                                                                                     |
| 5 | Was selection of predictors based on univariable analysis avoided?                                                              | If the predictors are not selected on the basis of univariable analysis prior to multivariable modeling.                                                                                                                                                                                                                                                                                                                                                                                     | If the predictors are selected on the basis of univariable analysis prior to multivariable modeling.                                                                                                                                                                                                                                                                                                                                                                                   | If there is no information to indicate that univariable selection is avoided.                                                                                                                                                                                                                                                                                       |
| 6 | Were complexities in the data (censoring, competing risks, sampling of control participants) accounted for appropriately?       | If any complexities in the data are accounted for appropriately, or if it is clear that any potential data complexities have been identified appropriately as unimportant.                                                                                                                                                                                                                                                                                                                   | If complexities in the data that could affect model performance are ignored. For example, case-control studies that do not estimate baseline risk or studies with censoring or competing risks that do not use survival analysis or other appropriate methods.                                                                                                                                                                                                                         | No information is provided on whether complexities in the data are present or accounted for appropriately if present.                                                                                                                                                                                                                                               |
| 7 | Were relevant model performance measures evaluated appropriately?                                                               | Yes: If both calibration (via calibration plot) and discrimination (c-index) are evaluated appropriately (including relevant measures tailored for models predicting survival outcomes).<br><br>Probably yes: if authors present a table of predicted probabilities with confidence intervals and corresponding outcome frequencies across subgroups                                                                                                                                         | If both calibration and discrimination are not evaluated, or if only goodness-of-fit tests (Hosmer-Lemeshow test), are used to evaluate calibration or if for models predicting survival outcomes performance measures accounting for censoring are not used, or if classification measures (like sensitivity, specificity, or predictive values) were presented using predicted probability thresholds derived from the data set at hand, but calibration is not otherwise evaluated. | Either calibration or discrimination are not reported, or no information is provided as to whether appropriate performance measures for survival outcomes are used (e.g., references to relevant literature or specific mention of methods, such as using Kaplan–Meier estimates), or no information on thresholds for estimating classification measures is given. |
| 8 | Were model overfitting, underfitting, and optimism in model performance accounted for?                                          | Yes: If internal validation techniques (bootstrapping and cross-validation) including all model development procedures, were used to account for any optimism in model fitting, and subsequent adjustment of the model performance estimates were applied.<br><br>Probably yes: If internal validation was used and optimism was estimated as very low, and then optimism-corrected performance measures were not appropriately calculated (accounting for all model development procedures) | No: If no internal validation has been performed, or if internal validation consists only of a single random split-sample of participant data.<br><br>Probably no: Internal validation with bootstrapping or cross-validation was conducted but did not include all model development procedures including any variable selection or were not used to correct model performance measures.                                                                                              | No information: No information is provided on whether internal validation techniques, including all model development procedures, have been applied.                                                                                                                                                                                                                |
| 9 | Do predictors and their assigned weights in the final model correspond to the results from the reported multivariable analysis? | If the predictors and regression coefficients in the final model correspond to reported results from multivariable analysis.                                                                                                                                                                                                                                                                                                                                                                 | If the predictors and regression coefficients in the final model do not correspond to reported results from multivariable analysis. (i.e. rounding of model coefficients to create a “risk score” are inappropriately determined).                                                                                                                                                                                                                                                     | If it is unclear whether the regression coefficients in the final model correspond to reported results from multivariable analysis.                                                                                                                                                                                                                                 |
|   |                                                                                                                                 | <b>Low risk of bias</b>                                                                                                                                                                                                                                                                                                                                                                                                                                                                      | <b>High risk of bias</b>                                                                                                                                                                                                                                                                                                                                                                                                                                                               | <b>Unclear risk of bias</b>                                                                                                                                                                                                                                                                                                                                         |
|   |                                                                                                                                 | If the answer to all signaling questions is “Yes” or “Probably yes,” then risk of bias can be considered low. If $\geq 1$ of the answers is “No” or “Probably no,” the judgment could still be “Low risk of bias” but specific reasons should be provided why the risk of bias can be considered low.                                                                                                                                                                                        | If the answer to any of the signaling questions is “No” or “Probably no,” there is a potential for bias, except if defined at low risk of bias above.                                                                                                                                                                                                                                                                                                                                  | If relevant information is missing for some of the signaling questions and none of the signaling questions is judged to put this domain at high risk of bias.                                                                                                                                                                                                       |

|                      |               |                    |                        |
|----------------------|---------------|--------------------|------------------------|
| <b>Applicability</b> |               |                    |                        |
|                      | <b>Domain</b> | <b>Low concern</b> | <b>High concern</b>    |
|                      |               |                    | <b>Unclear concern</b> |

|    |                                                                                                                       |                                                                                                                 |                                                                                                                                      |                                                                                                 |
|----|-----------------------------------------------------------------------------------------------------------------------|-----------------------------------------------------------------------------------------------------------------|--------------------------------------------------------------------------------------------------------------------------------------|-------------------------------------------------------------------------------------------------|
| 1  | <u>Participants</u> : do you have concern that the included participants or setting do not match the review question? | Included participants and clinical setting match the review question.                                           | Included participants and clinical setting were different from the review question.                                                  | If relevant information about the participants and clinical setting are not reported.           |
| 2  |                                                                                                                       |                                                                                                                 |                                                                                                                                      |                                                                                                 |
| 3  | <u>Predictors</u> : does the definition, assessment, or timing of predictors match the review questions?              | Definition, assessment, and timing of predictors match the review question.                                     | Definition, assessment, or timing of predictors were different from the review question                                              | If relevant information about the predictors is not reported.                                   |
| 4  |                                                                                                                       |                                                                                                                 |                                                                                                                                      |                                                                                                 |
| 5  | <u>Outcome</u> : does the definition, timing, or determination of outcome match the review question?                  | Outcome definition, timing, and method of determination defines the outcome as intended by the review question. | Choice of outcome definition, timing, and method of outcome determination defines another outcome as intended by the review question | If relevant information about the outcome, timing, and method of determination is not reported. |
| 6  |                                                                                                                       |                                                                                                                 |                                                                                                                                      |                                                                                                 |
| 7  |                                                                                                                       |                                                                                                                 |                                                                                                                                      |                                                                                                 |
| 8  |                                                                                                                       |                                                                                                                 |                                                                                                                                      |                                                                                                 |
| 9  |                                                                                                                       |                                                                                                                 |                                                                                                                                      |                                                                                                 |
| 10 |                                                                                                                       |                                                                                                                 |                                                                                                                                      |                                                                                                 |
| 11 |                                                                                                                       |                                                                                                                 |                                                                                                                                      |                                                                                                 |
| 12 |                                                                                                                       |                                                                                                                 |                                                                                                                                      |                                                                                                 |
| 13 |                                                                                                                       |                                                                                                                 |                                                                                                                                      |                                                                                                 |
| 14 |                                                                                                                       |                                                                                                                 |                                                                                                                                      |                                                                                                 |
| 15 |                                                                                                                       |                                                                                                                 |                                                                                                                                      |                                                                                                 |
| 16 |                                                                                                                       |                                                                                                                 |                                                                                                                                      |                                                                                                 |
| 17 |                                                                                                                       |                                                                                                                 |                                                                                                                                      |                                                                                                 |
| 18 |                                                                                                                       |                                                                                                                 |                                                                                                                                      |                                                                                                 |
| 19 |                                                                                                                       |                                                                                                                 |                                                                                                                                      |                                                                                                 |
| 20 |                                                                                                                       |                                                                                                                 |                                                                                                                                      |                                                                                                 |
| 21 |                                                                                                                       |                                                                                                                 |                                                                                                                                      |                                                                                                 |
| 22 |                                                                                                                       |                                                                                                                 |                                                                                                                                      |                                                                                                 |
| 23 |                                                                                                                       |                                                                                                                 |                                                                                                                                      |                                                                                                 |
| 24 |                                                                                                                       |                                                                                                                 |                                                                                                                                      |                                                                                                 |
| 25 |                                                                                                                       |                                                                                                                 |                                                                                                                                      |                                                                                                 |
| 26 |                                                                                                                       |                                                                                                                 |                                                                                                                                      |                                                                                                 |
| 27 |                                                                                                                       |                                                                                                                 |                                                                                                                                      |                                                                                                 |
| 28 |                                                                                                                       |                                                                                                                 |                                                                                                                                      |                                                                                                 |
| 29 |                                                                                                                       |                                                                                                                 |                                                                                                                                      |                                                                                                 |
| 30 |                                                                                                                       |                                                                                                                 |                                                                                                                                      |                                                                                                 |
| 31 |                                                                                                                       |                                                                                                                 |                                                                                                                                      |                                                                                                 |
| 32 |                                                                                                                       |                                                                                                                 |                                                                                                                                      |                                                                                                 |
| 33 |                                                                                                                       |                                                                                                                 |                                                                                                                                      |                                                                                                 |
| 34 |                                                                                                                       |                                                                                                                 |                                                                                                                                      |                                                                                                 |
| 35 |                                                                                                                       |                                                                                                                 |                                                                                                                                      |                                                                                                 |
| 36 |                                                                                                                       |                                                                                                                 |                                                                                                                                      |                                                                                                 |
| 37 |                                                                                                                       |                                                                                                                 |                                                                                                                                      |                                                                                                 |
| 38 |                                                                                                                       |                                                                                                                 |                                                                                                                                      |                                                                                                 |
| 39 |                                                                                                                       |                                                                                                                 |                                                                                                                                      |                                                                                                 |
| 40 |                                                                                                                       |                                                                                                                 |                                                                                                                                      |                                                                                                 |
| 41 |                                                                                                                       |                                                                                                                 |                                                                                                                                      |                                                                                                 |
| 42 |                                                                                                                       |                                                                                                                 |                                                                                                                                      |                                                                                                 |
| 43 |                                                                                                                       |                                                                                                                 |                                                                                                                                      |                                                                                                 |
| 44 |                                                                                                                       |                                                                                                                 |                                                                                                                                      |                                                                                                 |
| 45 |                                                                                                                       |                                                                                                                 |                                                                                                                                      |                                                                                                 |
| 46 |                                                                                                                       |                                                                                                                 |                                                                                                                                      |                                                                                                 |
| 47 |                                                                                                                       |                                                                                                                 |                                                                                                                                      |                                                                                                 |
| 48 |                                                                                                                       |                                                                                                                 |                                                                                                                                      |                                                                                                 |
| 49 |                                                                                                                       |                                                                                                                 |                                                                                                                                      |                                                                                                 |
| 50 |                                                                                                                       |                                                                                                                 |                                                                                                                                      |                                                                                                 |
| 51 |                                                                                                                       |                                                                                                                 |                                                                                                                                      |                                                                                                 |
| 52 |                                                                                                                       |                                                                                                                 |                                                                                                                                      |                                                                                                 |
| 53 |                                                                                                                       |                                                                                                                 |                                                                                                                                      |                                                                                                 |
| 54 |                                                                                                                       |                                                                                                                 |                                                                                                                                      |                                                                                                 |
| 55 |                                                                                                                       |                                                                                                                 |                                                                                                                                      |                                                                                                 |
| 56 |                                                                                                                       |                                                                                                                 |                                                                                                                                      |                                                                                                 |
| 57 |                                                                                                                       |                                                                                                                 |                                                                                                                                      |                                                                                                 |
| 58 |                                                                                                                       |                                                                                                                 |                                                                                                                                      |                                                                                                 |
| 59 |                                                                                                                       |                                                                                                                 |                                                                                                                                      |                                                                                                 |
| 60 |                                                                                                                       |                                                                                                                 |                                                                                                                                      |                                                                                                 |

For peer review only



## Supplemental File 6. Model outcome definitions

| Study ID                           | Outcome category                                  | Full outcome definition from the source paper                                                                                                                                                                                                                                                                                                                                                                                                                                                                                                                                                                                                                                                                                                                                    |
|------------------------------------|---------------------------------------------------|----------------------------------------------------------------------------------------------------------------------------------------------------------------------------------------------------------------------------------------------------------------------------------------------------------------------------------------------------------------------------------------------------------------------------------------------------------------------------------------------------------------------------------------------------------------------------------------------------------------------------------------------------------------------------------------------------------------------------------------------------------------------------------|
| Hussain / 2019                     | Treatment completion                              | The target variable TreatmentComplete consists of 64.37% positive (treatment complete) and 35.62% negative (treatment incomplete)                                                                                                                                                                                                                                                                                                                                                                                                                                                                                                                                                                                                                                                |
| Abdelbary / 2017 - Death           | Death                                             | All causes of death (TB or non-TB related) during the course of TB treatment                                                                                                                                                                                                                                                                                                                                                                                                                                                                                                                                                                                                                                                                                                     |
| Abdelbary / 2017 - TB-DM / Death   | Death                                             | Death included all causes of death (TB and non-TB related) during the course of TB treatment                                                                                                                                                                                                                                                                                                                                                                                                                                                                                                                                                                                                                                                                                     |
| Aljohaney / 2018                   | Death                                             | Not defined, but seems to be death during hospitalization.                                                                                                                                                                                                                                                                                                                                                                                                                                                                                                                                                                                                                                                                                                                       |
| Bastos / 2016                      | Death                                             | Deaths that occurred during the first 6 months after diagnosis were classified as TB death                                                                                                                                                                                                                                                                                                                                                                                                                                                                                                                                                                                                                                                                                       |
| Gupta-Wright / 2019                | Death                                             | The outcome was mortality risk at 2 months after admission.                                                                                                                                                                                                                                                                                                                                                                                                                                                                                                                                                                                                                                                                                                                      |
| Horita / 2013                      | Death                                             | 'Discharged alive' was defined as being discharged alive and satisfying the discharge criteria, i.e., when the patient was receiving effective treatment, showed clinical improvement and negative conversion was confirmed. Negative conversion was defined as three or more consecutive sputum samples obtained on different days being smear-negative for acid-fast bacilli or when appropriate sputum sample(s) were culture-negative. 'Died in hospital' was defined as death from any cause.                                                                                                                                                                                                                                                                               |
| Koegelenberg / 2015                | Death                                             | Patients were categorised as either ICU/hospital survivors or non-survivors.                                                                                                                                                                                                                                                                                                                                                                                                                                                                                                                                                                                                                                                                                                     |
| Nguyen (general pop) / 2018        | Death                                             | Documented treatment outcome of 'completed' or 'died'                                                                                                                                                                                                                                                                                                                                                                                                                                                                                                                                                                                                                                                                                                                            |
| Nguyen (TB-DM) / 2019              | Death                                             | TB treatment outcome of either 'completed' or 'died'                                                                                                                                                                                                                                                                                                                                                                                                                                                                                                                                                                                                                                                                                                                             |
| Nguyen (TB-HIV) / 2018             | Death                                             | Given the main purpose of our study is to predict the mortality during TB treatment in HIV-infected patients against the treatment completion, patients who had an outcome coding other than completed or died.                                                                                                                                                                                                                                                                                                                                                                                                                                                                                                                                                                  |
| Pefura-Yone / 2017                 | Death                                             | At treatment completion, patients are ranked into the following mutually exclusive categories 1) cured-patient with negative smear at the last month of treatment and at least one of the preceding months; 2) treatment completed-patient who has completed the treatment and for whom the smear results at the end of the last month are not available; 3) failure-patient with positive smear at the 5th month or later during treatment; 4) death-death from any cause during treatment; 5) defaulter-patient who's treatment has been interrupted for at least two consecutive months; 6) transfer-patient transferred to complete his treatment in another center and who's treatment outcome is unknown Cured and treatment completed are considered successful treatment |
| Podlekareva / 2013                 | Death                                             | Death within 12 months of TB diagnosis                                                                                                                                                                                                                                                                                                                                                                                                                                                                                                                                                                                                                                                                                                                                           |
| Valade / 2012                      | Death                                             | Final outcomes of survival or death were recorded                                                                                                                                                                                                                                                                                                                                                                                                                                                                                                                                                                                                                                                                                                                                |
| Wang / 2019                        | Death                                             | The outcome was estimated with all-cause mortality, with the mortality in 12 months as the primary outcome and the mortality in 3, 6, 9 months as other outcome                                                                                                                                                                                                                                                                                                                                                                                                                                                                                                                                                                                                                  |
| Wejse / 2008                       | Death                                             | Mortality: ability to predict death                                                                                                                                                                                                                                                                                                                                                                                                                                                                                                                                                                                                                                                                                                                                              |
| Zhang / 2019                       | Death                                             | Primary treatment outcome was documented either survival or death when HIV/TB co-infected patients left hospital. Patients who survived when discharged received 12-month follow-up, and the date of last known alive was documented in electronic medical records base on records of last follow-up                                                                                                                                                                                                                                                                                                                                                                                                                                                                             |
| Abdelbary / 2017 - Failure         | Treatment failure                                 | Treatment failure indicated smear-positive persistence at or after 5 months of treatment with first-line anti-TB medications.                                                                                                                                                                                                                                                                                                                                                                                                                                                                                                                                                                                                                                                    |
| Kalhari (logistic) / 2010          | Treatment failure                                 | The dependent variable was failing in treatment course completion.                                                                                                                                                                                                                                                                                                                                                                                                                                                                                                                                                                                                                                                                                                               |
| Keane / 1997                       | Treatment failure                                 | Failing to clear the sputum of acid-fast bacilli with standard treatment and having to start second line therapy                                                                                                                                                                                                                                                                                                                                                                                                                                                                                                                                                                                                                                                                 |
| Luies / 2017                       | Treatment failure                                 | From the original samples, all treatment failure cases were included.                                                                                                                                                                                                                                                                                                                                                                                                                                                                                                                                                                                                                                                                                                            |
| Mburu / 2018 - Failure             | Treatment failure                                 | The secondary analyses only compared 'cures' versus 'failures' at similar time points as is the standard practice when examining chemotherapy efficacy                                                                                                                                                                                                                                                                                                                                                                                                                                                                                                                                                                                                                           |
| Thompson / 2017                    | Treatment failure                                 | Patients' clinical outcomes were classified as 'cured' if they proved and maintained sputum culture negativity by month 6 after treatment initiation (M6), 'failed' if the M6 culture was still positive, and 'un-evaluable' if contamination caused uncertainty in outcome. We note that none of the treatment failures achieved culture negativity at any time point during treatment.                                                                                                                                                                                                                                                                                                                                                                                         |
| Abdelbary / 2017 - TB-DM / Default | Default, Abandon, or LTF (interruption >2 months) | Never defined                                                                                                                                                                                                                                                                                                                                                                                                                                                                                                                                                                                                                                                                                                                                                                    |
| Belilovsky / 2010                  | Default, Abandon, or LTF (interruption >2 months) | We evaluated TI initiated by the patient (significant noncompliance with the doctor's prescribed course of treatment and serious violations of public order in hospitals) resulting in inpatient treatment cancellation.                                                                                                                                                                                                                                                                                                                                                                                                                                                                                                                                                         |
| Chang / 2004                       | Default, Abandon, or LTF                          | Default was defined as failure to collect drugs for 2 months or more after registration                                                                                                                                                                                                                                                                                                                                                                                                                                                                                                                                                                                                                                                                                          |



|                            |                                                                             |                                                                                                                                                                                                                                                                                                                                                                                                                                                                                                                                                                                                                                                                                                                                                                                                                                      |
|----------------------------|-----------------------------------------------------------------------------|--------------------------------------------------------------------------------------------------------------------------------------------------------------------------------------------------------------------------------------------------------------------------------------------------------------------------------------------------------------------------------------------------------------------------------------------------------------------------------------------------------------------------------------------------------------------------------------------------------------------------------------------------------------------------------------------------------------------------------------------------------------------------------------------------------------------------------------|
|                            | (interruption >2 months)                                                    |                                                                                                                                                                                                                                                                                                                                                                                                                                                                                                                                                                                                                                                                                                                                                                                                                                      |
| 1<br>2<br>3<br>4<br>5      | Default, Abandon, or LTF (interruption >2 months)<br>Chee / 2000            | Defaulter or cases were defined as patients on anti-tuberculosis treatment at the TBCU who failed to turn up for their scheduled appointments despite usual attempts to recall them by phone or mail, as described below, and from whom at least one home visit during the study was recorded                                                                                                                                                                                                                                                                                                                                                                                                                                                                                                                                        |
| 6<br>7<br>8<br>9           | Default, Abandon, or LTF (interruption >2 months)<br>Cherkaoui / 2014       | Treatment default was defined as an interruption in TB treatment for >=2 consecutive months.                                                                                                                                                                                                                                                                                                                                                                                                                                                                                                                                                                                                                                                                                                                                         |
| 10<br>11<br>12<br>13       | Default, Abandon, or LTF (interruption >2 months)<br>Rodrigo / 2012         | Interruption of treatment for any reason for more than 2 months, non-completion of treatment within 9 months when the patient is placed on a 6 month regimen. or drug intake of <80% the prescribed dose.                                                                                                                                                                                                                                                                                                                                                                                                                                                                                                                                                                                                                            |
| 14<br>15<br>16             | Treatment success (cure + completion)<br>Kalhori (predicting) / 2009        | For each patient dependent variable was recorded whether or not the patient finished the treatment course and get cured.                                                                                                                                                                                                                                                                                                                                                                                                                                                                                                                                                                                                                                                                                                             |
| 17<br>18                   | Unfavorable outcome (death + failure)<br>Sauer / 2018                       | The primary outcome was treatment failure, which we defined as failure of therapy or death.                                                                                                                                                                                                                                                                                                                                                                                                                                                                                                                                                                                                                                                                                                                                          |
| 19<br>20<br>21             | Unfavorable outcome (death, failure, LTF, NE)<br>Baussano / 2008            | Treatment interruption or default, treatment failure, transferred out cases and those lost to follow-up were grouped as 'unsuccessful outcomes'                                                                                                                                                                                                                                                                                                                                                                                                                                                                                                                                                                                                                                                                                      |
| 22<br>23<br>24<br>25<br>26 | Unfavorable outcome (death, failure, LTF, NE)<br>Costa-Veiga / 2017         | In line with WHO criteria, SVIG-TB categorized a six possible and mutually exclusive categories for treatment outcomes, grouped in this study into a binary outcome: (i) Successful outcome-if PTB patients were treated before and declared cured, including both negative smear microscopy at the end of treatment at least one previous follow-up test and in case of not providing sputum samples, cure is declared if treatment completed and absent of disease clinical evidences (categories 1 and 2). (ii) Unsuccessful outcome-if treatment of PTB patients resulted in failure (i.e. remaining smear-positive after 5 months of treatment, cat. 3), default (i.e. patients who interrupted their treatment for two consecutive months or more after registration, cat. 4), death (cat. 5) or were transferred-out (cat. 6) |
| 27<br>28<br>29             | Unfavorable outcome (death, failure, LTF, NE)<br>Killian / 2019             | We label 'Cured' and 'Treatment Complete' to be favorable outcomes and 'Died', 'Treatment failed', and 'Lost to follow-up' to be unfavorable outcomes                                                                                                                                                                                                                                                                                                                                                                                                                                                                                                                                                                                                                                                                                |
| 30<br>31<br>32             | Unfavorable outcome (death, failure, LTF, NE)<br>Madan / 2018               | Favourable treatment outcomes included cure and treatment completed. Unfavourable treatment outcomes included death, loss to follow-up, treatment failure, transfer out, or a switch to MDR TB treatment.                                                                                                                                                                                                                                                                                                                                                                                                                                                                                                                                                                                                                            |
| 33<br>34<br>35             | Unfavorable outcome (death, failure, LTF, NE)<br>Mburu / 2018 - Unfavorable | The primary analyses compared favorable versus unfavorable outcomes at end of treatment                                                                                                                                                                                                                                                                                                                                                                                                                                                                                                                                                                                                                                                                                                                                              |
| 36<br>37<br>38             | Other composite outcome<br>Kalhori (fuzzy) / 2009                           | The values of outcomes might be any values from 1 to 5 which means different outcomes. Value 1 means patient completed the treatment course in frame of DOTS, 2 means the patient has been cured, 3 means patients has quitted the course, 4 means patients has failed and finally 5 is a sign of dead as outcome of TB treatment course                                                                                                                                                                                                                                                                                                                                                                                                                                                                                             |

## Supplemental File 7. Model presentation

| Study ID                           | Final model                                                                                                                                                                                                                                                                                                                                                                                                                                                                                                                                                                                                                                                                                                                                                                                                                                                                                                                                                                                                                                                                                                                                                                                                                                                                                                                      |
|------------------------------------|----------------------------------------------------------------------------------------------------------------------------------------------------------------------------------------------------------------------------------------------------------------------------------------------------------------------------------------------------------------------------------------------------------------------------------------------------------------------------------------------------------------------------------------------------------------------------------------------------------------------------------------------------------------------------------------------------------------------------------------------------------------------------------------------------------------------------------------------------------------------------------------------------------------------------------------------------------------------------------------------------------------------------------------------------------------------------------------------------------------------------------------------------------------------------------------------------------------------------------------------------------------------------------------------------------------------------------|
| Abdelbary / 2017 - Death           | 2 + 2*(Age 41-65) + 5*(Age>=65) + 2*(Male gender) + 4*(MDR TB) + 3*(HIV) + 3*(Malnutrition) + 2*(Alcoholism) + 2*(Male*diabetes) + 3*(HIV*pulmonary TB) - 1*(diabetes) - 1*(pulmonary TB)                                                                                                                                                                                                                                                                                                                                                                                                                                                                                                                                                                                                                                                                                                                                                                                                                                                                                                                                                                                                                                                                                                                                        |
| Abdelbary / 2017 - Failure         | 8*(No or low education) + 40*(MDR) + 10*(AFB smear +2) + 15*(AFB smear +3)                                                                                                                                                                                                                                                                                                                                                                                                                                                                                                                                                                                                                                                                                                                                                                                                                                                                                                                                                                                                                                                                                                                                                                                                                                                       |
| Abdelbary / 2017 - TB-DM / Death   | 2 + 3*(Male gender) + 3*(Malnutrition) - 1*(BCG vaccinated) - 1*(AFB smear positive)                                                                                                                                                                                                                                                                                                                                                                                                                                                                                                                                                                                                                                                                                                                                                                                                                                                                                                                                                                                                                                                                                                                                                                                                                                             |
| Abdelbary / 2017 - TB-DM / Default | 2 + 2*(Age<40) + 2*(Male gender) + 4*(HIV)                                                                                                                                                                                                                                                                                                                                                                                                                                                                                                                                                                                                                                                                                                                                                                                                                                                                                                                                                                                                                                                                                                                                                                                                                                                                                       |
| Aljohaney / 2018                   | Don't report final model, but show the beta coefficients. The coefficients are written as predictor (beta-coefficient): age 3 65 (2.497), congestive heart failure (1.231), bilateral disease on chest x-ray (1.192)                                                                                                                                                                                                                                                                                                                                                                                                                                                                                                                                                                                                                                                                                                                                                                                                                                                                                                                                                                                                                                                                                                             |
| Bastos / 2016                      | 3*(Hypoxemic respiratory failure) + 2*(Age>=50) + 1*(Bilateral involvement) + 1*(At least one of: HIV, diabetes, liver failure/cirrhosis, congestive heart failure, chronic respiratory disease) + 1*(Hemoglobin<12)                                                                                                                                                                                                                                                                                                                                                                                                                                                                                                                                                                                                                                                                                                                                                                                                                                                                                                                                                                                                                                                                                                             |
| Baussano / 2008                    | Nomogram with: residency status (residential vs. homeless), sex, geographic origin (non-EU vs. EU), case definition (other than definite vs. definite), treatment setting (inpatient and unknown vs. outpatient), age (continuous)                                                                                                                                                                                                                                                                                                                                                                                                                                                                                                                                                                                                                                                                                                                                                                                                                                                                                                                                                                                                                                                                                               |
| Belilovsky / 2010                  | -3.2 + 0.8*(male gender) + 0.7*(unemployment) + 0.4*(retreatment case) + 1.1*(alcohol abuse) + 0.6*(no data about alcohol) + 0.8*(severe TB form) - 0.3*(urban residence) + 0.4*(age 25-50) + 0.8*(pulmonary TB) + 0.5*(prison history)                                                                                                                                                                                                                                                                                                                                                                                                                                                                                                                                                                                                                                                                                                                                                                                                                                                                                                                                                                                                                                                                                          |
| Chang / 2004                       | Don't report final model. Just show odds ratios of predictors but don't report intercept term, which are written as predictor (OR) as follows: Current smokers (3.44), ex-smokers (2.48), history of default (10.74), no history of default (0.80),                                                                                                                                                                                                                                                                                                                                                                                                                                                                                                                                                                                                                                                                                                                                                                                                                                                                                                                                                                                                                                                                              |
| Chee / 2000                        | The OR for each predictor is as follow in the format predictor (OR): Non-Chinese race (8.08), Living with family vs. living alone/with friends (0.08), Treatment duration (1.85). Treatment duration is categorical as 6 months, 9 months, and >9 months, but only one OR is presented.                                                                                                                                                                                                                                                                                                                                                                                                                                                                                                                                                                                                                                                                                                                                                                                                                                                                                                                                                                                                                                          |
| Cherkaoui / 2014                   | 2 points for yes to the following questions: Are you younger than 50 years of age? Do you feel work is interfering with your ability to take TB treatment? Are you taking a retreatment regimen for TB? Do you or doctor think you are having moderate or severe side effects from TB treatment Are you required to get your TB treatment daily? Have you told your friends that you have TB? (1 point for no) Are you a current smoker (1 point for yes) Did you TB symptoms go away within 2 months of starting TB treatment (1 point for yes) Do you know how long your TB treatment is supposed to last (1 point for no) Have you ever smoked cigarettes (-1 point for no)                                                                                                                                                                                                                                                                                                                                                                                                                                                                                                                                                                                                                                                   |
| Costa-Veiga / 2017                 | Nomogram with: HIV, previous treatment, age class (25-44, 15-24, 45-64, >64), IV drug use, pathologies (other disease comorbidity: yes/no)                                                                                                                                                                                                                                                                                                                                                                                                                                                                                                                                                                                                                                                                                                                                                                                                                                                                                                                                                                                                                                                                                                                                                                                       |
| Gupta-Wright / 2019                | 9*(Male sex) + 7*(patient aged 55+) + 6*(currently taking ART) + 7*(unable to walk unaided) + 7*(hemoglobin <80, severe anemia) + 6*(positive on urine TB-LAM)                                                                                                                                                                                                                                                                                                                                                                                                                                                                                                                                                                                                                                                                                                                                                                                                                                                                                                                                                                                                                                                                                                                                                                   |
| Horita / 2013                      | 1*Age (years) + 10*(oxygen requirement) - 20*(albumin) + 5*(semi-dependent, ADL) + 10*(total dependent, ADL)                                                                                                                                                                                                                                                                                                                                                                                                                                                                                                                                                                                                                                                                                                                                                                                                                                                                                                                                                                                                                                                                                                                                                                                                                     |
| Hussain / 2019                     | None                                                                                                                                                                                                                                                                                                                                                                                                                                                                                                                                                                                                                                                                                                                                                                                                                                                                                                                                                                                                                                                                                                                                                                                                                                                                                                                             |
| Kalhari (fuzzy) / 2009             | Learned parameters by training set for each predictor written as predictor (learned parameter): Case type (0.467), treatment category (-0.079), risky sex (-0.945), prison (0.992), sex (0.400), recent TB infection (0.793), diabetes (2.445), low body weight (1.313), TB type (0.950), length (-0.235), previous imprisonment (2.398), age (0.237), area (0.8895), HIV (0.731)                                                                                                                                                                                                                                                                                                                                                                                                                                                                                                                                                                                                                                                                                                                                                                                                                                                                                                                                                |
| Kalhari (logistic) / 2010          | exp(-0.93 - 0.71*(gender) + 0.02*(age) - 0.02*(weight) + 0.5*(nationality) + 0.99*(prison) + 0.16*(case type))                                                                                                                                                                                                                                                                                                                                                                                                                                                                                                                                                                                                                                                                                                                                                                                                                                                                                                                                                                                                                                                                                                                                                                                                                   |
| Kalhari (predicting) / 2009        | exp(-1.58 - 0.12*(age) + 0.807*(gender) - 0.039*(nationality) - 0.263*(prison) + 0.15*(area) + 0.021*(weight))                                                                                                                                                                                                                                                                                                                                                                                                                                                                                                                                                                                                                                                                                                                                                                                                                                                                                                                                                                                                                                                                                                                                                                                                                   |
| Keane / 1997                       | Unclear. No constant term provided. Here are the predictor (OR): Mediastinal shift (2.1), average smear score (1.5), extensive lesions (3.6), any previous treatment (2.3), cavities (1.7), weight (0.98)                                                                                                                                                                                                                                                                                                                                                                                                                                                                                                                                                                                                                                                                                                                                                                                                                                                                                                                                                                                                                                                                                                                        |
| Killian / 2019                     | LEAP = Lstm rEal-time Adherence Predictor with 2 input layers, 1) LSTM with 64 hidden units and a dense layer with 48 units for the dense layer and 4 units for the penultimate layer                                                                                                                                                                                                                                                                                                                                                                                                                                                                                                                                                                                                                                                                                                                                                                                                                                                                                                                                                                                                                                                                                                                                            |
| Koegelenberg / 2015                | One point for each parameter: septic shock, HIV with CD4 < 200, creatinine > 140 (male) or >120 (female), P:F O2 ratio < 200, chest radiograph showing miliary pattern/parenchymal infiltrates, absence of TB treatment at admission                                                                                                                                                                                                                                                                                                                                                                                                                                                                                                                                                                                                                                                                                                                                                                                                                                                                                                                                                                                                                                                                                             |
| Luies / 2017                       | Written as predictor (OR): 3,5,-Dihydroxybenzoic acid (25.6), 3-(4-Hydroxy-3-methoxyphenyl) propionic acid (1.3)                                                                                                                                                                                                                                                                                                                                                                                                                                                                                                                                                                                                                                                                                                                                                                                                                                                                                                                                                                                                                                                                                                                                                                                                                 |
| Madan / 2018                       | Written as predictor (OR): New TB with 1+ smear grade (5.78), New TB with 2+ smear grade (2.69), New TB with 3+ smear grade (1.69), New TB without smear (1.67), New TB with smear positive, unknown grade (1.00), Previously treated, smear negative TB (1.35), previously treated with scanty smear (4.74), previously treated with 1+ smear grade (1.61), previously treated with 2+ smear grade (1.05), previously treated with 3+ smear grade (7.54), previously treated with no sputum smear (2.46), previously treated with unknown grade (30.37), pulmonary TB (1.83), pulmonary and extrapulmonary TB (5.86), HIV+ on ART with CD4 350-500 (8.09), HIV+ on ART with CD4 200-350 (6.14), HIV+ on ART with CD4 50-200 (16.35), HIV+ on ART with CD4 <50 (38.76), HIV+ not on ART with CD4 350-500 (53.44), HIV+ not on ART with CD4 200-350 (65.98), HIV+ not on ART with CD4 50-200 (6.94), HIV+ not on ART with CD4 <50 (49.20), HIV+ diagnosed after TB with CD4>500 (1.05), HIV+ diagnosed after TB with CD4 350-500 (2.49), HIV+ diagnosed after TB with CD4 200-350 (8.88), HIV+ diagnosed after TB with CD4 50-200 (6.79), HIV+ diagnosed after TB with CD4 <50 (13.99), Female 25-34 (9.41), Female 35-44 (1.75), Female >= 45 (4.49), Male 15-24 (10.63), Male 25-34 (2.74), Male 35-44 (2.9), Male >= 45 (3.96) |
| Mburu / 2018 - Failure             | Present relative scores for each covariate included with scores of 100, 72.61, 69.19, 55.39, 49.87, 48.74, 48.18, 46.51, 39.69, and 37.69 for hba1c, regimen, age, weight, random blood glucose, BMI, BUN, HIV positive result, ever smoker, creatinine, respectively                                                                                                                                                                                                                                                                                                                                                                                                                                                                                                                                                                                                                                                                                                                                                                                                                                                                                                                                                                                                                                                            |
| Mburu / 2018 - Unfavorable         | Present relative scores for each covariate included, not sure if this was how it should be used. Relative scores are 100, 79.38, 70.09, 63.93, 62.47, 62.63, 61.63, 55.62, 39.21, 34.48 for hba1c, regimen, creatinine, BMI, BUN, weight, age, random blood glucose, HIV positive result, male gender, respectively                                                                                                                                                                                                                                                                                                                                                                                                                                                                                                                                                                                                                                                                                                                                                                                                                                                                                                                                                                                                              |
| Nguyen (general pop) / 2018        | 6*[Age 45-64] + 12*[Age>65] + 2*[US born] + 2*[Homeless] + 4*[Resident of LTCF] + 8*[Chronic kidney failure] + 10*[Meningeal TB] + 4*[Miliary TB] + 6*[TB-CXR] + 6*[HIV positive] + 6*[HIV unknown]                                                                                                                                                                                                                                                                                                                                                                                                                                                                                                                                                                                                                                                                                                                                                                                                                                                                                                                                                                                                                                                                                                                              |
| Nguyen (TB-DM) / 2019              | 16*[Age >= 65] + 5*[US-born] + 11*[Homeless] + 20*[IDU] + 20*[Chronic kidney failure] + 20*[TB meningitis] + 13*[Miliary TB] + 6*[AFB positive smear] + 24*[Positive HIV]                                                                                                                                                                                                                                                                                                                                                                                                                                                                                                                                                                                                                                                                                                                                                                                                                                                                                                                                                                                                                                                                                                                                                        |
| Nguyen (TB-HIV) / 2018             | Prognostic score: 5*[Age >= 65] + 12*[Resident of LTCF] + 9*[Meningeal TB] + 6*[abnormal CXR] + 9*[diagnosis confirmed with positive culture or NAA] + 10*[culture not converted or unknown]                                                                                                                                                                                                                                                                                                                                                                                                                                                                                                                                                                                                                                                                                                                                                                                                                                                                                                                                                                                                                                                                                                                                     |

|    |                    |                                                                                                                                                                                                                                                                                                |
|----|--------------------|------------------------------------------------------------------------------------------------------------------------------------------------------------------------------------------------------------------------------------------------------------------------------------------------|
| 1  |                    | Model: $-6.994499 + 1.069024 * [\text{Age} \geq 65] + 2.541147 * [\text{Resident of LTCF}] + 1.998852 * [\text{Meningeal TB}] + 1.37995 * [\text{abnormal CXR}] + 1.899108 * [\text{diagnosis confirmed with positive culture or NAA}] + 2.186305 * [\text{culture not converted or unknown}]$ |
| 2  | Pefura-Yone / 2017 | $1 / (1 + \exp(-1.3120 + 0.0474 * [\text{age}] - 0.1866 * [\text{adjusted BMI}] + 1.1637 * [\text{PTB-}] + 0.5418 * [\text{ETB}] + 1.3820 * [\text{HIV}]))$                                                                                                                                    |
| 3  | Podlekareva / 2013 | $1 * [\text{DST performed}] + 2 * [\text{Initial treatment with RHZ}] + 2 * [\text{cART started before or up to 1 month after TB diagnosis}]$                                                                                                                                                  |
| 4  | Rodrigo / 2012     | $1 * [\text{Immigrant}] + 1 * [\text{Living alone}] + 1 * [\text{Living in an institution}] + 2 * [\text{Previous TB treatment}] + 2 * [\text{Linguistic barriers}] + 4 * [\text{IV drug use}] + 1 * [\text{Unknown IV drug use}]$                                                             |
| 6  | Sauer / 2018       | Negatively correlated: drug sensitivity (sensitive), employment status (employed), microscopy: 1 to 99 acid-resistant bacteria in 100 fields of view when stained by Ziehl-Nielsen, dissemination (diffuse pulmonary nodules detected)                                                         |
| 8  | Thompson / 2017    | Heatmap of differentially expressed genes                                                                                                                                                                                                                                                      |
| 9  | Valade / 2012      | Sum of three parameters: military tuberculosis (yes: +1, no: 0), required mechanical ventilation on ICU admission (yes: +1, no: 0), and required vasopressor infusion (yes: +1, no: 0).                                                                                                        |
| 11 | Wang / 2019        | Unknown                                                                                                                                                                                                                                                                                        |
| 12 | Wejse / 2008       | 1 point for each variable: cough, hemoptysis, dyspnea, chest pain, night sweating, anemia conjunctivae, tachycardia, positive funding at lung auscultation, temperature >37, BMI <18, BMI <16, MUAC <220, MUAC <200                                                                            |
| 13 | Zhang / 2019       | $2 * [\text{Anemia (HGB} < 90\text{g/L)}] + 2 * [\text{Tuberculous meningitis}] + 5 * [\text{Severe pneumonia}] + 2 * [\text{Hypoalbuminemia}] + 7 * [\text{Unexplained infections or space-occupying lesions}] + 5 * [\text{Malignancies}]$                                                   |

For peer review only

| Section/topic                      | #  | Checklist item                                                                                                                                                                                                                                                                                              | Reported on page #            |
|------------------------------------|----|-------------------------------------------------------------------------------------------------------------------------------------------------------------------------------------------------------------------------------------------------------------------------------------------------------------|-------------------------------|
| <b>TITLE</b>                       |    |                                                                                                                                                                                                                                                                                                             |                               |
| Title                              | 1  | Identify the report as a systematic review, meta-analysis, or both.                                                                                                                                                                                                                                         | 1                             |
| <b>ABSTRACT</b>                    |    |                                                                                                                                                                                                                                                                                                             |                               |
| Structured summary                 | 2  | Provide a structured summary including, as applicable: background; objectives; data sources; study eligibility criteria, participants, and interventions; study appraisal and synthesis methods; results; limitations; conclusions and implications of key findings; systematic review registration number. | 3                             |
| <b>INTRODUCTION</b>                |    |                                                                                                                                                                                                                                                                                                             |                               |
| Rationale                          | 3  | Describe the rationale for the review in the context of what is already known.                                                                                                                                                                                                                              | 5-6                           |
| Objectives                         | 4  | Provide an explicit statement of questions being addressed with reference to participants, interventions, comparisons, outcomes, and study design (PICOS).                                                                                                                                                  | Supplemental File 2           |
| <b>METHODS</b>                     |    |                                                                                                                                                                                                                                                                                                             |                               |
| Protocol and registration          | 5  | Indicate if a review protocol exists, if and where it can be accessed (e.g., Web address), and, if available, provide registration information including registration number.                                                                                                                               | Abstract and p. 7             |
| Eligibility criteria               | 6  | Specify study characteristics (e.g., PICOS, length of follow-up) and report characteristics (e.g., years considered, language, publication status) used as criteria for eligibility, giving rationale.                                                                                                      | 7-8                           |
| Information sources                | 7  | Describe all information sources (e.g., databases with dates of coverage, contact with study authors to identify additional studies) in the search and date last searched.                                                                                                                                  | 8                             |
| Search                             | 8  | Present full electronic search strategy for at least one database, including any limits used, such that it could be repeated.                                                                                                                                                                               | Supplemental file 3           |
| Study selection                    | 9  | State the process for selecting studies (i.e., screening, eligibility, included in systematic review, and, if applicable, included in the meta-analysis).                                                                                                                                                   | 8-9                           |
| Data collection process            | 10 | Describe method of data extraction from reports (e.g., piloted forms, independently, in duplicate) and any processes for obtaining and confirming data from investigators.                                                                                                                                  | 8-9                           |
| Data items                         | 11 | List and define all variables for which data were sought (e.g., PICOS, funding sources) and any assumptions and simplifications made.                                                                                                                                                                       | 9; Supplemental Files 4 and 5 |
| Risk of bias in individual studies | 12 | Describe methods used for assessing risk of bias of individual studies (including specification of whether this was done at the study or outcome level), and how this information is to be used in any data synthesis.                                                                                      | 9; Supplemental File 5        |
| Summary measures                   | 13 | State the principal summary measures (e.g., risk ratio, difference in means).                                                                                                                                                                                                                               | N/A                           |
| Synthesis of results               | 14 | Describe the methods of handling data and combining results of studies, if done, including measures of consistency (e.g., $I^2$ ) for each meta-analysis.                                                                                                                                                   | 8-9                           |
| Risk of bias across studies        | 15 | Specify any assessment of risk of bias that may affect the cumulative evidence (e.g., publication bias, selective reporting within studies).                                                                                                                                                                | N/A                           |
| Additional analyses                | 16 | Describe methods of additional analyses (e.g., sensitivity or subgroup analyses, meta-regression), if done, indicating which were pre-specified.                                                                                                                                                            | N/A                           |
| <b>RESULTS</b>                     |    |                                                                                                                                                                                                                                                                                                             |                               |
| Study selection                    | 17 | Give numbers of studies screened, assessed for eligibility, and included in the review, with reasons for exclusions at each stage, ideally with a flow diagram.                                                                                                                                             | 11; Figure 1                  |
| Study characteristics              | 18 | For each study, present characteristics for which data were extracted (e.g., study size, PICOS, follow-up period) and provide the citations.                                                                                                                                                                | 11-13; Table 3, 4, 5          |

|                               |    |                                                                                                                                                                                                          |                        |
|-------------------------------|----|----------------------------------------------------------------------------------------------------------------------------------------------------------------------------------------------------------|------------------------|
| Risk of bias within studies   | 19 | Present data on risk of bias of each study and, if available, any outcome level assessment (see item 12).                                                                                                | 13-14; Figures 3 and 4 |
| Results of individual studies | 20 | For all outcomes considered (benefits or harms), present, for each study: (a) simple summary data for each intervention group (b) effect estimates and confidence intervals, ideally with a forest plot. | 11-14; Table 2         |
| Synthesis of results          | 21 | Present results of each meta-analysis done, including confidence intervals and measures of consistency.                                                                                                  | N/A                    |
| Risk of bias across studies   | 22 | Present results of any assessment of risk of bias across studies (see Item 15).                                                                                                                          | N/A                    |
| Additional analysis           | 23 | Give results of additional analyses, if done (e.g., sensitivity or subgroup analyses, meta-regression [see Item 16]).                                                                                    | N/A                    |
| <b>DISCUSSION</b>             |    |                                                                                                                                                                                                          |                        |
| Summary of evidence           | 24 | Summarize the main findings including the strength of evidence for each main outcome; consider their relevance to key groups (e.g., healthcare providers, users, and policy makers).                     | 15-19                  |
| Limitations                   | 25 | Discuss limitations at study and outcome level (e.g., risk of bias), and at review-level (e.g., incomplete retrieval of identified research, reporting bias).                                            | 18                     |
| Conclusions                   | 26 | Provide a general interpretation of the results in the context of other evidence, and implications for future research.                                                                                  | 19                     |
| <b>FUNDING</b>                |    |                                                                                                                                                                                                          |                        |
| Funding                       | 27 | Describe sources of funding for the systematic review and other support (e.g., supply of data); role of funders for the systematic review.                                                               | 20                     |

# BMJ Open

## A systematic review of prediction models for pulmonary tuberculosis treatment outcomes in adults

|                                 |                                                                                                                                                                                                                                                                                                                                                                                                                                                                                                                                                       |
|---------------------------------|-------------------------------------------------------------------------------------------------------------------------------------------------------------------------------------------------------------------------------------------------------------------------------------------------------------------------------------------------------------------------------------------------------------------------------------------------------------------------------------------------------------------------------------------------------|
| Journal:                        | <i>BMJ Open</i>                                                                                                                                                                                                                                                                                                                                                                                                                                                                                                                                       |
| Manuscript ID                   | bmjopen-2020-044687.R2                                                                                                                                                                                                                                                                                                                                                                                                                                                                                                                                |
| Article Type:                   | Original research                                                                                                                                                                                                                                                                                                                                                                                                                                                                                                                                     |
| Date Submitted by the Author:   | 09-Feb-2021                                                                                                                                                                                                                                                                                                                                                                                                                                                                                                                                           |
| Complete List of Authors:       | Peetluk, Lauren; Vanderbilt University School of Medicine, Epidemiology<br>Ridolfi, Felipe; Instituto Nacional de Infectologia Evandro Chagas<br>Rebeiro, Peter; Vanderbilt University School of Medicine, Epidemiology;<br>Vanderbilt University School of Medicine, Division of Infectious Diseases<br>Liu, Dandan; Vanderbilt University School of Medicine, Biostatistics<br>Rolla, Valeria; Instituto Nacional de Infectologia Evandro Chagas<br>Sterling, Timothy; Vanderbilt University School of Medicine, Division of<br>Infectious Diseases |
| <b>Primary Subject Heading</b>: | Infectious diseases                                                                                                                                                                                                                                                                                                                                                                                                                                                                                                                                   |
| Secondary Subject Heading:      | Global health, Patient-centred medicine, Public health                                                                                                                                                                                                                                                                                                                                                                                                                                                                                                |
| Keywords:                       | Tuberculosis < INFECTIOUS DISEASES, Epidemiology < INFECTIOUS DISEASES, STATISTICS & RESEARCH METHODS                                                                                                                                                                                                                                                                                                                                                                                                                                                 |
|                                 |                                                                                                                                                                                                                                                                                                                                                                                                                                                                                                                                                       |

SCHOLARONE™  
Manuscripts



I, the Submitting Author has the right to grant and does grant on behalf of all authors of the Work (as defined in the below author licence), an exclusive licence and/or a non-exclusive licence for contributions from authors who are: i) UK Crown employees; ii) where BMJ has agreed a CC-BY licence shall apply, and/or iii) in accordance with the terms applicable for US Federal Government officers or employees acting as part of their official duties; on a worldwide, perpetual, irrevocable, royalty-free basis to BMJ Publishing Group Ltd ("BMJ") its licensees and where the relevant Journal is co-owned by BMJ to the co-owners of the Journal, to publish the Work in this journal and any other BMJ products and to exploit all rights, as set out in our [licence](#).

The Submitting Author accepts and understands that any supply made under these terms is made by BMJ to the Submitting Author unless you are acting as an employee on behalf of your employer or a postgraduate student of an affiliated institution which is paying any applicable article publishing charge ("APC") for Open Access articles. Where the Submitting Author wishes to make the Work available on an Open Access basis (and intends to pay the relevant APC), the terms of reuse of such Open Access shall be governed by a Creative Commons licence – details of these licences and which [Creative Commons](#) licence will apply to this Work are set out in our licence referred to above.

Other than as permitted in any relevant BMJ Author's Self Archiving Policies, I confirm this Work has not been accepted for publication elsewhere, is not being considered for publication elsewhere and does not duplicate material already published. I confirm all authors consent to publication of this Work and authorise the granting of this licence.

1  
2  
3 **A systematic review of prediction models for pulmonary tuberculosis**  
4 **treatment outcomes in adults**  
5  
6  
7

8 Lauren S. Peetluk, MPH,<sup>1</sup> Felipe M. Ridolfi, MD, MSc,<sup>2</sup> Peter F. Rebeiro, PhD, MHS,<sup>1,3</sup> Dandan  
9  
10 Liu, PhD,<sup>4</sup> Valeria C. Rolla, MD, PhD,<sup>2</sup> Timothy R. Sterling, MD<sup>3</sup>  
11  
12

13 <sup>1</sup>Division of Epidemiology, Department of Medicine, Vanderbilt University School of Medicine,  
14  
15 Nashville, Tennessee, USA  
16

17 <sup>2</sup>Instituto Nacional de Infectologia Evandro Chagas (INI) – Fiocruz, Rio de Janeiro, Brazil  
18

19 <sup>3</sup>Division of Infectious Diseases, Department of Medicine, Vanderbilt University School of  
20  
21 Medicine, Nashville, TN, USA  
22  
23

24 <sup>4</sup>Department of Biostatistics, Vanderbilt University School of Medicine, Nashville, TN, USA  
25  
26  
27

28 Corresponding author:

29 Lauren S. Peetluk, MPH  
30 A2209 Medical Center North  
31 1161 21st Avenue South  
32 Nashville, TN 37203  
33 E-mail: [lauren.s.peetluk@vanderbilt.edu](mailto:lauren.s.peetluk@vanderbilt.edu)  
34  
35  
36

37 Word count main text: 3617  
38  
39  
40  
41  
42  
43  
44  
45  
46  
47  
48  
49  
50  
51  
52  
53  
54  
55  
56  
57  
58  
59  
60



## **ABSTRACT**

**Objective:** To systematically review and critically evaluate prediction models developed to predict tuberculosis (TB) treatment outcomes among adults with pulmonary tuberculosis.

**Design:** Systematic review

**Data sources:** PubMed, Embase, Web of Science, and Google Scholar were searched for studies published January 1, 1995 - January 9, 2020.

**Study selection and data extraction:** Studies that developed a model to predict pulmonary TB treatment outcomes were included. Study screening, data extraction, and quality assessment were conducted independently by two reviewers. Study quality was evaluated using the Prediction model Risk Of Bias Assessment Tool (PROBAST). Data were synthesized with narrative review and in tables and figures.

**Results:** 14,739 articles were identified, 536 underwent full-text review, and 33 studies presenting 37 prediction models were included. Model outcomes included death (n=16, 43%), treatment failure (n=6, 16%), default (n=6, 16%) or a composite outcome (n=9, 25%). Most models (n=29, 78%) measured discrimination (median c-statistic=0.75; interquartile range: 0.68-0.84), and 17 (46%) reported calibration, often the Hosmer-Lemeshow test (n=13). Nineteen (51%) models were internally validated, and six (16%) were externally validated. Eighteen studies (54%) mentioned missing data, and of those, half (n=9) used complete case analysis. The most common predictors included age, sex, extrapulmonary TB, body mass index (BMI), chest x-ray results, previous TB, and HIV. Risk of bias varied across studies, but all studies had high risk of bias in their analysis.

**Conclusions:** TB outcome prediction models are heterogeneous with disparate outcome definitions, predictors, and methodology. We do not recommend applying any in clinical settings

1  
2  
3 without external validation, and encourage future researchers adhere to guidelines for developing  
4 and reporting of prediction models.  
5  
6

7 **Registration:** The study was registered on the international prospective register of systematic  
8 reviews PROSPERO (CRD42020155782)  
9  
10  
11  
12  
13  
14  
15  
16  
17  
18  
19  
20  
21  
22  
23  
24  
25  
26  
27  
28  
29  
30  
31  
32  
33  
34  
35  
36  
37  
38  
39  
40  
41  
42  
43  
44  
45  
46  
47  
48  
49  
50  
51  
52  
53  
54  
55  
56  
57  
58  
59  
60

## **ARTICLE SUMMARY:**

### **Strengths and limitations**

- Prediction models for tuberculosis treatment outcomes have the potential to inform interventions or treatment management protocols to promote cure among tuberculosis patients at the greatest risk of unsuccessful treatment outcomes, but the methods and clinical utility of existing models had not been formally evaluated.
- This was the first systematic review of prediction models for tuberculosis treatment outcomes.
- The review used a comprehensive search strategy, conducted thorough bias assessment with the Prediction Model Risk of Bias Assessment Tool (PROBAST) tool, and offers recommendations for future model development and validation studies for predicting tuberculosis treatment outcomes.
- Evidence synthesis and quality assessment were limited by incomplete reporting in primary studies, as well as heterogeneities in study populations, such as multi-drug resistance and age.
- External validation studies or studies written in languages other than English, Spanish, Portuguese, or French were excluded.

## **BACKGROUND**

Tuberculosis (TB) is one of the top ten causes of death worldwide and a leading cause of death from an infectious disease. In 2018, 10 million people developed TB and 1.45 million people died from it globally, despite widespread availability of curative treatment.[1] Global treatment success was 85% for all new and relapse TB patients in 2018. For HIV-associated TB, it was 75%. These proportions are lower than the End TB Strategy target of  $\geq 90\%$  treatment success.[2]

Heeding early recognition that *Mycobacterium tuberculosis* develops resistance rapidly in response to single-drug therapy, TB has been treated with combination regimens for more than 50 years.[3] Aside from weight-based dosing, the World Health Organization (WHO) and other TB guidelines authorities recommend a standardized approach for treatment of almost all TB patients.[4–6] The current recommendation for drug-susceptible TB includes 2 months of isoniazid, rifampin, pyrazinamide, and ethambutol, followed by 4 months of isoniazid and rifampin.

Due to the long duration of TB treatment, it would be beneficial to understand early predictors of unsuccessful TB treatment outcomes to identify patients needing tailored treatment approaches, such as directly observed therapy (DOT) or extended treatment course. Research suggests that individual characteristics, such as HIV, age, undernutrition, diabetes, TB disease severity, extrapulmonary TB, history of TB, adherence, alcohol use, and adverse drug reactions, are associated with unsuccessful TB treatment outcomes, but results vary by setting and patient population.[7–10]

Prediction models, defined as any combination or equation of two or more predictors to estimate an individualized probability of a specific endpoint within a defined period of time, are

1  
2  
3 increasingly common in TB research.[11] The large number of recent prediction models for TB  
4  
5 outcomes highlights the common desire to identify TB patients at greatest risk of an unsuccessful  
6  
7 treatment outcome. However, to date, there has not been a formal synthesis or quality assessment  
8  
9 of existing prediction models for TB treatment outcomes, which is essential to determine  
10  
11 whether they should be used to inform care and may help guide development of future models.  
12  
13 Thus, we conducted a systematic review to identify, describe, compare, and synthesize clinical  
14  
15 prediction models designed to predict TB treatment outcomes among persons with pulmonary  
16  
17 TB.  
18  
19  
20  
21  
22  
23  
24  
25  
26  
27  
28  
29  
30  
31  
32  
33  
34  
35  
36  
37  
38  
39  
40  
41  
42  
43  
44  
45  
46  
47  
48  
49  
50  
51  
52  
53  
54  
55  
56  
57  
58  
59  
60

## **METHODS AND ANALYSIS**

All steps of the systematic review were carried out according to guidelines set by Cochrane Prognosis Methods Group (PMG) and PROGnosis RESearch Strategy (PROGRESS).[12–14] Reporting adhered to the Preferred Reporting Items for Systematic Reviews and Meta-Analyses (**Supplemental File 1**). This study was pre-registered on Open Science Framework (OSF) (<https://osf.io/rz3wp>) and the international prospective register of systematic reviews (PROSPERO; CRD42020155782).

### **Study eligibility criteria**

The review question was defined according to the PICOTS (Population, Intervention, Comaparator, Outcomes, Timing, Setting) framework (**Supplemental File 2**). In brief, the goal was to identify prognostic models developed to predict TB treatment outcomes among pulmonary TB cases. The main endpoint was unsuccessful TB treatment outcome, defined by the WHO as the combination of death, treatment failure, loss to follow-up, and/or not evaluated, as compared to successful TB treatment outcome, defined as the combination of cure or treatment completion (**Table 1**) [15]. Loss to follow-up was sometimes referred to as default or treatment abandonment.

Inclusion criteria were: 1) prognostic model studies with or without external validation[16]; 2) study population included adult, drug-susceptible, pulmonary, TB cases; 3) written in English, Spanish, Portuguese, and French; 4) published between January 1, 1995 and January 9, 2020; 5) treatment outcome was one of the following: cure, treatment completion, death, treatment failure, loss to follow-up, or not evaluated.

Exclusion criteria were: 1) predictive value of more than one variable was evaluated but not combined in a prediction model; 2) study population was only multi-drug resistant (MDR) TB cases, only extrapulmonary TB cases, or only children (< 18 years-old); 3) outcome was

1  
2  
3 evaluated during treatment such as: two-month smear/culture conversion, acquired resistance,  
4  
5 adverse events, quality of life; 4) long-term outcomes, such as relapse, recurrence, or post-  
6  
7 treatment mortality.  
8  
9

10 The decision to include only articles in English, Spanish, Portuguese, and French was  
11  
12 based on study team capabilities. The dates reflect modern TB treatment practice; first-line TB  
13  
14 treatment regimens were not available until the early 1990s.[17,18] Articles that included a  
15  
16 combination of drug-susceptible and drug-resistant cases, or a combination of children and adults  
17  
18 were included.  
19  
20

### 21 **Search strategy and selection criteria**

22 The following electronic databases were searched on January 9, 2020: PubMed, Embase,  
23  
24 Web of Science, and the first 200 references from Google Scholar. This combination of  
25  
26 databases achieved best overall recall for systematic reviews in a recent study.[19]  
27  
28 Clinicaltrials.gov and retractiondatabase.org were also searched for unpublished research.  
29  
30 Reference lists of retrieved articles were checked to identify eligible studies.  
31  
32  
33

34 Search terms relating to the “prediction model” component of the search were adapted  
35  
36 from a PubMed search strategy that captured prediction model studies with sensitivity of  
37  
38 98%.[20] That component was combined with terms relating to TB treatment outcomes. The  
39  
40 search strategy, developed in PubMed, was adapted for all other databases with assistance from a  
41  
42 reference librarian (**Supplemental File 3**).  
43  
44  
45

46 Article selection was conducted in three stages. The first stage was automatic de-  
47  
48 duplication and title screening, carried out using *revtools* in RStudio (version 1.2).[21]  
49  
50 Remaining articles were imported into Covidence, a web-based software platform that  
51  
52 streamlines systematic reviews, where abstracts (Stage 2) and full text (Stage 3) were manually  
53  
54 screened.[22] Stages 2 and 3 were carried out by two independent reviewers (LSP and FMR).  
55  
56  
57  
58  
59

1  
2  
3 Discordance was discussed between reviewers, and if consensus was not reached, a third party  
4 arbitrated (one of TRS, VCR, PFR, DL). In stage 3, reasons for exclusion were documented  
5  
6 according to Preferred Reporting Items for Systematic Reviews and Meta-Analyses (PRISMA).  
7  
8  
9

## 10 **Data analysis**

11  
12 Data from selected studies were recorded using a database designed in REDCap  
13  
14 (Vanderbilt University).[23,24] Data extraction was informed by the CHecklist for critical  
15  
16 Appraisal and data extraction for systematic Reviews of prediction Modelling Studies  
17  
18 (CHARMS) and the Prediction Model Risk of Bias Assessment Tool (PROBAST).[16,25,26]  
19  
20 CHARMS checklist and PROBAST are in **Supplemental Files 4 and 5**, respectively.  
21  
22

23  
24 Quality assessment and applicability of included studies was assessed using PROBAST  
25  
26 by dual independent review.[16,26] PROBAST was specifically designed to assess risk of bias of  
27  
28 prediction model studies, which included identifying deficiencies in study design, conduct, or  
29  
30 analysis that led to inaccurate estimates of predictive performance. PROBAST has 4 domains:  
31  
32 participants, predictors, outcome, and analysis with 20 total signaling questions. Each question  
33  
34 was answered on the scale: yes, probably yes, no, probably no, no information. Domains were  
35  
36 scored as low, high, and unclear risk of bias. PROBAST also guides assessment of applicability  
37  
38 of participants, predictors, and outcomes from each included study to the review question.  
39  
40  
41

42  
43 Results were summarized narratively and in tables and figures. Meta-analysis was not  
44  
45 possible due to lack of external validation and use of disparate predictors, outcome definitions,  
46  
47 and modeling methods. For studies that presented multiple models with the same set of  
48  
49 predictors and outcomes, but different methods, the best-performing method was included in data  
50  
51 synthesis. For studies presenting multiple models with different sets of predictors (i.e. baseline  
52  
53 data vs. longitudinal data), the model developed using only baseline data was included. If studies  
54  
55 developed multiple models for different outcomes or with different populations, all models were  
56  
57  
58  
59  
60



1  
2  
3 included. To further evaluate the impact of study population heterogeneities on prediction model  
4  
5 performance, we additionally examined results after stratifying studies by inclusion/exclusion of  
6  
7 MDR and younger age groups.  
8  
9

### 10 **Patient and public involvement**

11  
12 Neither patients nor the public were involved in the design, conduct, or reporting of the  
13  
14 research, as it was not feasible or appropriate for this systematic review. The study protocol is  
15  
16 publicly available at <https://osf.io/rz3wp>.  
17  
18

### 19 **Role of the funding source**

20  
21 The funder of the study had no role in study design, data collection, data analysis, data  
22  
23 interpretation, or writing of the report. The corresponding author had full access to all the data in  
24  
25 the study and had final responsibility for the decision to submit for publication.  
26  
27  
28  
29  
30  
31  
32  
33  
34  
35  
36  
37  
38  
39  
40  
41  
42  
43  
44  
45  
46  
47  
48  
49  
50  
51  
52  
53  
54  
55  
56  
57  
58  
59  
60

## **RESULTS**

### **Study selection**

The search identified 14,739 unique studies. After excluding irrelevant titles, 6,426 abstracts were screened, 536 articles underwent full-text review, and 33 model development studies presenting 37 prediction models were included (**Figure 1**).

### **Study characteristics**

Of the 33 studies, most were retrospective cohorts (n=25, 76%), three (9%) were prospective cohort studies, two (6%) were case-control studies, and three (9%) were nested case-control studies. Data from nearly half of studies (n=16, 48%) were collected from surveillance systems; eleven (33%) studies used a data collection form developed specifically for their study and six studies (18%) extracted data from medical records. Median sample size was 803 (interquartile range (IQR): 291-4167). Full details on included studies are in **Table 2**.

Thirteen studies (41%) took place in Asia, eight (25%) in Africa, six (19%) in Europe, four (12%) in North America, and one (3%) included sites in Europe and Argentina. Fewer than half (n=14, 45%) took place in high-burden TB settings.<sup>1</sup> One study did not report study location. (**Tables 2 and 3**).

Reporting of population characteristics varied by study (**Table 4**). Among 18 studies that reported a measure of central tendency (mean or median) for age, the median of those measures was 41 years (IQR: 37-49). Of 17 studies that reported the minimum age of participants, seven (41%) had a minimum age of 15, one (6%) had a minimum age of 16, one (6%) had a minimum age of 17, and the remainder had minimum age of 18. Eighteen studies reported including persons living with HIV (PLWH); 5 of these included only TB/HIV patients. Thirteen studies reported including persons with diabetes; one of which included only TB/DM. Eight studies

1  
2  
3 reported including some participants with MDR, though prevalence of MDR was low in all  
4  
5 studies. Ten studies included only hospitalized patients, and in 14 studies, all participants were  
6  
7 on directly observed therapy (DOT).  
8  
9

### 10 **Model characteristics**

11  
12 Model outcomes included death (n=16, 43%), treatment failure (n=6, 16%), default (n=6,  
13  
14 16%) or a composite outcome (n=8, 23%) (**Tables 2 and 5**). The complete outcome definition  
15  
16 for all included studies is in **Supplemental File 6**.  
17  
18

19  
20 Most models were developed using clinical/epidemiologic predictors (n=34, 92%), two  
21  
22 (6%) used multiple biomarkers, and one (3%) used adherence data. The most common candidate  
23  
24 predictors were age, sex, extrapulmonary TB, smear result, BMI, x-ray findings, and previous  
25  
26 TB. The most common predictors retained in the final models were age, sex, extrapulmonary TB,  
27  
28 BMI, chest x-ray results, previous TB, and HIV (**Figure 2**).  
29  
30

31  
32 Only three models (8%) used survival analysis; most models used logistic regression  
33  
34 (n=29, 78%) and five (14%) used a machine learning approach. More than half of studies (n=19,  
35  
36 51%) considered variables for inclusion in the multivariable model based on unadjusted  
37  
38 associations with the outcome. Model building methods varied widely between models (**Table**  
39  
40 **5**).  
41  
42

43  
44 Only 19 (51%) models were internally validated, including ten (53%) split-sample  
45  
46 validation, five (26%) bootstrap resampling, and four (21%) cross-validation. Six (16%) models  
47  
48 were externally validated. Many models (n=30, 81%) reported discrimination with c-statistic  
49  
50 (concordance statistic) or area under the receiver operating characteristic (AUROC), which are  
51  
52 equivalent and quantify the ability of the model to distinguish between patients who do and do  
53  
54 not develop an outcome. Only 17 (46%) reported calibration, the agreement between observed  
55  
56  
57  
58  
59  
60

1  
2  
3 and predicted outcomes. Most studies assessed calibration with Hosmer-Lemeshow tests (n=13,  
4 77%); only two studies provided a calibration plot, the preferred reporting method for prediction  
5 model studies,[16,27,28] and one reported the calibration slope (**Table 2**). Models were  
6 presented a variety of ways, the most common of which was a weighted risk score (n=16, 43%);  
7 details on model presentation are in **Supplemental File 7**.

### 14 **Quality assessment**

15  
16 Grading of PROBAST signaling questions is summarized in **Figure 3**, and the summary  
17 risk of bias for the participants, predictors, outcome, and analysis domains and assessment of  
18 applicability are shown in **Figure 4**. More than half of the studies were at low risk of bias for the  
19 population and outcomes domains, but all studies were at high risk of bias in the analysis  
20 domain.

21  
22 Common sources of population bias included use of non-nested case-control  
23 design[29,30], nested case-control design without proper estimation of baseline risk,[31,32] or  
24 inappropriate inclusion/exclusion criteria.[33,34] Sources of predictor bias included lack of  
25 standardized assessment of key predictors (i.e. HIV, diabetes, chest x-ray scoring)[9,29,31,34–  
26 36] or timing of data collection/availability that would limit the intended use of the  
27 model.[9,29,37] Within the outcomes domain, sources of bias included subjective[35] or non-  
28 standard[32,38] outcome measures and inconsistent outcome ascertainment.[29]

29  
30 Bias in the analysis domain was widespread. More than half of the models included were  
31 likely overfit due to low events per variable (EPV) ratios (**Table 5**). Only 6 studies handled  
32 continuous and categorical variables appropriately (i.e., didn't dichotomize continuous variables,  
33 considered non-linearity of continuous variables).[31,39–43] Most studies used complete case-  
34 analysis or did not mention missing data; no study used multiple imputation in their main  
35  
36  
37  
38  
39  
40  
41  
42  
43  
44  
45  
46  
47  
48  
49  
50  
51  
52  
53  
54  
55  
56  
57  
58  
59  
60

1  
2  
3 analysis. One study with low amounts of missing data (<5%) conducted sensitivity analysis with  
4 multiple imputation.[44] A different study excluded only two people out of a total sample size of  
5 1007 with missing data, which would have little impact on model performance.[45] Fewer than  
6 half (n=14) of studies avoided univariable predictor selection, and only three studies used  
7 survival analysis, appropriately accounting for censoring.[36,45,46] Performance measures were  
8 appropriately reported (i.e. calibration assessed with plot and discrimination assessed with c-  
9 statistic/AUROC) in three studies.[41,44,47] Only two studies estimated optimism (degree to  
10 which data are overfit) or accounted for potential overfitting with penalization of model  
11 parameters.[35,41] Ten studies appropriately presented their model with model coefficients or  
12 nomograms, which prevents bias from rounding or transforming model coefficients to generate a  
13 risk score.[30,33,35,37,38,45,47–55]

14  
15  
16  
17  
18  
19  
20  
21  
22  
23  
24  
25  
26  
27  
28  
29  
30  
31  
32  
33  
34  
35  
36  
37  
38  
39  
40  
41  
42  
43  
44  
45  
46  
47  
48  
49  
50  
51  
52  
53  
54  
55  
56  
57  
58  
59  
60

About half of the models (n=19, 51%) were applicable to the review question in all domains. However, unclear reporting of target population or predictor and outcome definitions limited assessment of applicability for several studies.[38,49,50,56,57] Additionally, studies that included only hospitalized patients with specific laboratory parameters may not be routinely available in the clinical setting.[39,40,42] Results from analyses stratified by inclusion of patients with MDR and minimum age <18 are presented in **Supplemental File 8**.

## **DISCUSSION**

In this comprehensive, systematic review of prediction models for pulmonary TB treatment outcomes, we identified 33 model development studies presenting 37 prediction models. Although diagnostic prediction models for prevalent TB were previously systematically reviewed, this is the first review of TB treatment outcomes.[58] The included prediction models were developed for predicting death, treatment failure, default, or a composite unfavorable outcome during TB treatment. Most models reported good performance (c-statistic/AUROC>0.7), but all were evaluated to have high risk of bias due to poor reporting, exclusion of missing data, weak methodologic approaches, lack of calibration assessment, and limited validation. Population heterogeneities, such as differences in inclusion/exclusion of individuals with MDR and younger ages, and varying predictor and outcome definitions limited comparisons between models.

More than half of the models included in the review were developed in low burden TB settings, and none were developed specifically in South America. Prediction of TB treatment outcome is especially important in high burden TB settings, where resources may be limited, and risk assessment can guide resource allocation toward patients who need the most involved care.

Common risk factors included in the models were consistent with well-established risk factors for poor TB treatment outcomes, including age, sex, HIV, extrapulmonary TB, baseline smear results, and previous TB treatment. Among studies that included PLWH, only three considered factors related to management/severity of HIV, such as receipt of antiretroviral therapy, CD4 cell count, or viral load, which likely impacted TB treatment outcomes.[40,46,51] Laboratory values or metabolic biomarkers, such as hemoglobin, hemoglobin A1c or random blood glucose, may also be associated with treatment outcome and worth considering as candidate predictors. There is increasing evidence that diabetes impacts TB treatment outcomes,

1  
2  
3 but caution is warranted about how to best define diabetes in the context of a prediction model to  
4 ensure consistency and reproducibility across studies.[59] Behavioral characteristics, such as  
5 tobacco use, alcohol use, and drug use were rarely included in final prediction models and are  
6 difficult to collect objectively, suggesting their role in prediction models for TB treatment  
7 outcomes may be limited.  
8  
9  
10  
11  
12  
13

14 Additionally, several studies excluded participants with HIV, diabetes, extrapulmonary  
15 TB, or MDR TB, because these factors negatively influence treatment outcomes. However,  
16 careful consideration should be given to inclusion/exclusion criteria in prediction model studies,  
17 given that information should be available at the time of intended model use, which may not  
18 always hold for these aforementioned factors.[60] This is especially questionable for MDR,  
19 given that conventional drug-susceptibility testing results are not available for several weeks  
20 after TB diagnosis; though more recent advances in rapid molecular methods such as GeneXpert  
21 or line-probe assays offer rapid screening.[61]  
22  
23  
24  
25  
26  
27  
28  
29  
30  
31  
32

33 TB researchers should thoughtfully consider how to appropriately handle complexities of  
34 censoring and competing risks in TB outcomes research. Only three studies in this review used  
35 survival analysis, despite the long duration of TB treatment outcome assessment and relatively  
36 high rates of losses to follow-up across studies, and no studies considered competing risks, such  
37 as death due to other causes.[62] Losses to follow-up were frequently excluded, which can lead  
38 to selection bias.  
39  
40  
41  
42  
43  
44  
45

46 Though all included studies were at high risk of bias in the analysis domain, we want to  
47 highlight two studies with some exemplary characteristics.[41,44] Pefura-Yone et al.[41] provide  
48 clear explanations of study design, inclusion/exclusion criteria, and data collection procedures;  
49 TB diagnosis and treatment outcome definitions were standard.[63] Non-linearity of continuous  
50  
51  
52  
53  
54  
55  
56  
57  
58  
59  
60

1  
2  
3 variables was considered with restricted cubic splines, and no continuous variables were  
4  
5 categorized or dichotomized; the final model includes four predictors that are easy to collect and  
6  
7 routinely assessed in most TB control programs, especially those in high burden settings. The  
8  
9 performance of the model was internally validated with bootstrap validation, and the  
10  
11 discrimination (c-statistic=0.808) was corrected for optimism. Model calibration was presented  
12  
13 graphically with calibration plots. The final model was presented as a nomogram with  
14  
15 instructions for use, which facilitates use in external validation studies. Gupta-Wright and  
16  
17 colleagues developed and externally validated a clinical risk score to predict mortality in high-  
18  
19 burden, low-resource settings.<sup>43</sup> They used clinical trial data with very low amounts of missing  
20  
21 data for model development, and externally validated the clinical risk score with data collected  
22  
23 independently from two other studies (a clinical trial and a prospective cohort). Given high  
24  
25 amounts (42%) of missing data in the validation cohort, they conducted sensitivity analysis using  
26  
27 multiple imputation for missing data; the c-statistic differed slightly between complete case and  
28  
29 multiple-imputation analyses in the validation cohort (0.68 vs. 0.64). Candidate predictors were  
30  
31 based on *a priori* clinical knowledge, previous literature, and required variables were objective,  
32  
33 reproducible, and available in low-resource settings, consistent with recommended  
34  
35 approaches.<sup>[26,60,64]</sup> Additionally, they reported model performance with the c-statistics and  
36  
37 calibration plots for development and validation cohorts, and reported results according to  
38  
39 TRIPOD (transparent reporting of a multivariable prediction model for individual prognosis or  
40  
41 diagnosis) guidance.<sup>[27,28]</sup> Regardless, each of these models requires external validation prior  
42  
43 to use in clinical practice.  
44  
45  
46  
47  
48  
49  
50

51 There are several limitations of this study. Data extraction was subject to reporting in the  
52  
53 primary study, which varied widely and was often incomplete, leading to challenges evaluating  
54  
55  
56  
57  
58  
59  
60



1  
2  
3 differences in model performance due to heterogeneities in study populations. Additionally,  
4  
5 though most studies reported discrimination, few presented a calibration curve, arguably the  
6  
7 most important measure of model performance, further inhibiting assessment and comparison of  
8  
9 model performance.[28,65] We did not include external validation studies, which is an essential  
10  
11 step for translation to clinical practice. However, several studies in the review did not include the  
12  
13 full model equation, which impedes their ability to be externally validated. Upon searching for  
14  
15 studies that externally validated prediction models in this review, we found three studies[66–68]  
16  
17 that evaluated the same model (TBScore).[36] Briefly, these studies evaluated the ability of  
18  
19 TBScore to monitor treatment response in a new setting[66], refined the instrument (TBscoreII)  
20  
21 using exploratory factor analysis[67], and then evaluated TBscoreII for use in patients with  
22  
23 TB/HIV.[68] To our knowledge, no other studies included in the review were externally  
24  
25 validated by other sources. Finally, we excluded 10 studies that were not available in English,  
26  
27 Spanish, Portuguese, or French; all abstracts were available in English, and none reported model  
28  
29 performance metrics, so they likely would have been excluded for different reasons regardless.  
30  
31  
32  
33  
34

35 The findings of this review not only serve as a comprehensive overview of existing TB  
36  
37 outcome prediction models but can act as a resource for future model development and  
38  
39 validation of prediction models for TB treatment outcomes. We encourage researchers to focus  
40  
41 future TB outcome prediction models on easily collected and readily available predictors that are  
42  
43 widely generalizable. We highlight age, sex, extrapulmonary TB, BMI, chest x-ray results,  
44  
45 previous TB, and HIV as common predictors of TB treatment outcomes. Additionally, when  
46  
47 building a new prediction model, it is recommended to first prune the set of considered  
48  
49 predictors based on expert opinion and previous literature, rather than univariable analysis or  
50  
51 variable selection processes[26,60,64] Future model development or validation studies should  
52  
53  
54  
55  
56  
57  
58  
59  
60

1  
2  
3 adhere to the TRIPOD guidelines, which provide a 22-item checklist and aims to improve the  
4 reporting of prediction model development studies.[27,28] We also encourage researchers  
5  
6 consider PROBAST criteria to limit bias in design and conduct of prognostic studies.  
7  
8  
9

10 Prediction models are an important tool in TB management. They can lay the foundation  
11 for future impact studies by providing risk estimation to target novel treatment approaches,  
12 resource allocation, or intensive case management towards patients who are least likely to  
13 achieve cure and most likely to benefit from intervention, especially in high-burden and low-  
14 resources areas. Use of prediction models can potentially help guide tuberculosis treatment  
15 practices to achieve the End TB Strategy goal of >90% treatment success, but methodologic  
16 rigor and detailed reporting must be improved. Though our findings suggest that none of the  
17 existing models are ready for clinical application without extensive external validation, we hope  
18 they direct future researchers to make use of guidelines for development and reporting of  
19 prediction models.  
20  
21  
22  
23  
24  
25  
26  
27  
28  
29  
30  
31  
32  
33  
34  
35  
36  
37  
38  
39  
40  
41  
42  
43  
44  
45  
46  
47  
48  
49  
50  
51  
52  
53  
54  
55  
56  
57  
58  
59  
60

## **FOOTNOTES**

**Ethics approval:** Not required.

**Transparency statement:** The lead author affirms that the manuscript is an honest, accurate, and transparent account of the study being reported. No important aspects of the study have been omitted, and any discrepancies from the study as planned were explained.

**Contributorship:** LSP conceptualized the research question, designed the protocol, and drafted the manuscript. LSP and FMR screened studies. FMR, PFR, DL, VCR and TRS provided feedback on the research design, original protocol, and revised successive drafts of the manuscript. All authors approved the final version of the manuscript.

**Funding:** This work was supported by the National Center for Advancing Translational Sciences [CTSA Award No. TL1TR000447 to L.S.P.] and the National Institutes of Allergy and Infectious Diseases [F31AI152614-01A1 to L.S.P.]. Its contents are solely the responsibility of the authors and do not necessarily represent the official views the National Center for Advancing Translational Sciences or the National Institutes of Health.

**Competing interests:** None declared.

**Data sharing:** The study protocol is available online at <https://osf.io/rz3wp>. Most included studies are publicly available. Additional data and code are available upon request.

**Exclusive license:** This is an Open Access article distributed in accordance with the terms of the Creative Commons Attribution (CC BY 4.0) license, which permits others to distribute, remix, adapt and build upon this work, for commercial use, provided the original work is properly cited.

See: <http://creativecommons.org/licenses/by/4.0/>.

## REFERENCES

- 1 Global Tuberculosis Report 2019. Geneva: : World Health Organization 2019. Licence: CC BY-NC-SA 3.0 IGO.
- 2 *The END TB Strategy*. Geneva: : World Health Organization 2015.
- 3 Kerantzas CA, Jacobs WR. Origins of Combination Therapy for Tuberculosis: Lessons for Future Antimicrobial Development and Application. *mBio* 2017;**8**:e01586-16. doi:10.1128/MBIO.01586-16
- 4 Nahid P, Dorman SE, Alipanah N, *et al*. Official American Thoracic Society/Centers for Disease Control and Prevention/Infectious Diseases Society of America Clinical Practice Guidelines: Treatment of Drug-Susceptible Tuberculosis. *Clinical Infectious Diseases* 2016;**63**:e147–95. doi:10.1093/cid/ciw376
- 5 Guidelines for treatment of drug-susceptible tuberculosis and patient care, 2017 update. Geneva: : World Health Organization 2017. Licence: CC BY-NC-SA 3.0 IGO. doi:WHO/HTM/TB/2017.05
- 6 WHO consolidated guidelines on drug-resistant tuberculosis treatment. Geneva: : World Health Organization 2019. Licence: CC BY-NC-SA 3.0 IGO.
- 7 Vasankari T, Holmström P, Ollgren J, *et al*. Risk factors for poor tuberculosis treatment outcome in Finland: A cohort study. *BMC Public Health* 2007;**7**:1–9. doi:10.1186/1471-2458-7-291
- 8 Ramachandran G, Agibothu K. Factors Influencing Tuberculosis Treatment Outcome in Adult Patients Treated with Thrice-Weekly Regimens. 2017;**61**:1–12.
- 9 Abdelbary BE, Garcia-Viveros M, Ramirez-Oropesa H, *et al*. Predicting treatment failure, death and drug resistance using a computed risk score among newly diagnosed TB patients in Tamaulipas, Mexico. *Epidemiology and Infection* 2017;**145**:3020–34. doi:10.1017/S0950268817001911
- 10 Torres NMC, Rodríguez JJQ, Andrade PSP, *et al*. Factors predictive of the success of tuberculosis treatment: A systematic review with meta-analysis. *PLoS ONE* 2019;**14**:1–24. doi:10.1371/journal.pone.0226507
- 11 Steyerberg EW, Moons KGM, van der Windt DA, *et al*. Prognosis Research Strategy (PROGRESS) 3: Prognostic Model Research. *PLoS Medicine* 2013;**10**:e1001381. doi:10.1371/journal.pmed.1001381
- 12 Riley R, Ridley G, Williams K, *et al*. Prognosis research: towards evidence-based results and a Cochrane methods group. 2014;**60**:863–5.
- 13 Moons KG, Hooft L, Williams K, *et al*. Implementing systematic reviews of prognosis studies in Cochrane. *The Cochrane database of systematic reviews* 2018;**10**:ED000129. doi:10.1002/14651858.ED000129

- 14 Debray TPA, Damen JAAG, Snell KIE, *et al.* A guide to systematic review and meta-analysis of prediction model performance. *BMJ (Online)* 2017;**356**. doi:10.1136/bmj.i6460
- 15 Definitions and reporting framework for tuberculosis - 2013 revision. In: *Annex 2, TB case and treatment outcome definitions*. Geneva: : World Health Organization 2014.
- 16 Wolff RF, Moons KGM, Riley RD, *et al.* PROBAST: A tool to assess the risk of bias and applicability of prediction model studies. *Annals of Internal Medicine* 2019;**170**:51–8. doi:10.7326/M18-1376
- 17 Iseman MD. Tuberculosis therapy: past, present and future. *Eur Resp J* 2002;**20**:87s–94s. doi:10.1183/09031936.02.00309102
- 18 Council STSMR. Clinical trial of six-month and four-month regimens of chemotherapy in the treatment of pulmonary tuberculosis: the results up to 30 months. *Tubercle* 1981;:95–102.
- 19 Bramer WM, Rethlefsen ML, Kleijnen J, *et al.* Optimal database combinations for literature searches in systematic reviews: A prospective exploratory study. *Systematic Reviews* 2017;**6**:1–12. doi:10.1186/s13643-017-0644-y
- 20 Geersing GJ, Bouwmeester W, Zuithoff P, *et al.* Search filters for finding prognostic and diagnostic prediction studies in medline to enhance systematic reviews. *PLoS ONE* 2012;**7**:3–8. doi:10.1371/journal.pone.0032844
- 21 Westgate MJ. revtools: An R package to support article screening for evidence synthesis. *Research Synthesis Methods* 2019;**10**:606–14. doi:10.1002/jrsm.1374
- 22 Veritas Health Innovation, Melbourne A. Covidence systematic review software. Covidence. 2016. doi:10.1016/j.carbon.2012.08.062
- 23 Harris PA, Taylor R, Minor BL, *et al.* The REDCap consortium: Building an international community of software platform partners. *Journal of Biomedical Informatics* 2019;**95**:103208. doi:10.1016/j.jbi.2019.103208
- 24 Harris PA, Taylor R, Thielke R, *et al.* Research electronic data capture (REDCap)-A metadata-driven methodology and workflow process for providing translational research informatics support. *Journal of Biomedical Informatics* 2009;**42**:377–81. doi:10.1016/j.jbi.2008.08.010
- 25 Moons KGM, de Groot JAH, Bouwmeester W, *et al.* Critical Appraisal and Data Extraction for Systematic Reviews of Prediction Modelling Studies: The CHARMS Checklist. *PLoS Medicine* 2014;**11**. doi:10.1371/journal.pmed.1001744
- 26 Moons KGM, Wolff RF, Riley RD, *et al.* PROBAST: A tool to assess risk of bias and applicability of prediction model studies: Explanation and elaboration. *Annals of Internal Medicine* 2019;**170**:W1–33. doi:10.7326/M18-1377

- 1  
2  
3 27 Moons KGM, Altman DG, Reitsma JB, *et al.* Transparent reporting of a multivariable  
4 prediction model for individual prognosis or diagnosis (TRIPOD): Explanation and  
5 elaboration. *Annals of Internal Medicine* 2015;**162**:W1–73. doi:10.7326/M14-0698  
6  
7  
8 28 Collins GS, Reitsma JB, Altman DG, *et al.* Transparent Reporting of a multivariable  
9 prediction model for Individual Prognosis Or Diagnosis (TRIPOD): The TRIPOD Statement.  
10 2015;**162**. doi:10.7326/M14-0697  
11  
12 29 Cherkaoui I, Sabouni R, Ghali I, *et al.* Treatment default amongst patients with tuberculosis  
13 in urban Morocco: Predicting and explaining default and post-default sputum smear and drug  
14 susceptibility results. *PLoS ONE* 2014;**9**. doi:10.1371/journal.pone.0093574  
15  
16 30 Keane VP, De Klerk N, Krieng T, *et al.* Risk factors for the development of non-response to  
17 first-line treatment for tuberculosis in Southern Vietnam. *International Journal of*  
18 *Epidemiology* 1997;**26**:1115–20. doi:10.1093/ije/26.5.1115  
19  
20  
21 31 Chang KC, Leung CC, Tam CM. Risk factors for defaulting from anti-tuberculosis treatment  
22 under directly observed treatment in Hong Kong. *International Journal of Tuberculosis and*  
23 *Lung Disease* 2004;**8**:1492–8.  
24  
25 32 Chee CBE, Boudville IC, Chan SP, *et al.* Patient and disease characteristics, and outcome of  
26 treatment defaulters from the Singapore TB control unit - A one-year retrospective survey.  
27 *International Journal of Tuberculosis and Lung Disease* 2000;**4**:496–503. doi:NA  
28  
29  
30 33 Luies L, Reenen M Van, Ronacher K, *et al.* Predicting tuberculosis treatment outcome using  
31 metabolomics. *Biomarkers in Medicine* 2017;**11**:1057–67. doi:10.2217/bmm-2017-0133  
32  
33 34 Killian JA, Wilder B, Sharma A, *et al.* Learning to Prescribe Interventions for Tuberculosis  
34 Patients Using Digital Adherence Data. *KNOWLEDGE DISCOVERY AND DATA MINING*  
35 2019;**NA**:2430–8. doi:10.1145/3292500.3330777  
36  
37 35 Belilovsky EM, Borisov SE, Cook EF, *et al.* Treatment interruptions among patients with  
38 tuberculosis in Russian TB hospitals. *International Journal of Infectious Diseases*  
39 2010;**14**:e698–703. doi:10.1016/j.ijid.2010.03.001  
40  
41  
42 36 Wejse C, Gustafson P, Nielsen J, *et al.* TBscore: Signs and symptoms from tuberculosis  
43 patients in a low-resource setting have predictive value and may be used to assess clinical  
44 course. *Scandinavian Journal of Infectious Diseases* 2008;**40**:111–20.  
45 doi:10.1080/00365540701558698  
46  
47  
48 37 Nguyen DT, Graviss EA. Development and validation of a risk score to predict mortality  
49 during TB treatment in patients with TB-diabetes comorbidity. *BMC Infectious Diseases*  
50 2019;**19**:10. doi:10.1186/s12879-018-3632-5  
51  
52 38 Kalhori SRN, Zeng X. Fuzzy Logic Approach to Predict the Outcome of Tuberculosis  
53 Treatment Course Destination. *Lecture Notes in Engineering and Computer Science*  
54 2009;**2179**:774–8.  
55  
56  
57  
58  
59  
60



- 1  
2  
3 39 Horita N, Miyazawa N, Yoshiyama T, *et al.* Poor performance status is a strong predictor for  
4 death in patients with smear-positive pulmonary TB admitted to two Japanese hospitals.  
5 *Transactions of the Royal Society of Tropical Medicine and Hygiene* 2013;**107**:451–6.  
6 doi:10.1093/trstmh/trt037  
7  
8  
9 40 Koegelenberg CFN, Balkema CA, Jooste Y, *et al.* Validation of a severity-of-illness score in  
10 patients with tuberculosis requiring intensive care unit admission. *South African Medical*  
11 *Journal* 2015;**105**:389–92. doi:10.7196/SAMJ.9148  
12  
13 41 Pefura-Yone EW, Kuaban C, Assamba-Mpom SA, *et al.* Derivation, validation and  
14 comparative performance of a simplified chest X-ray score for assessing the severity and  
15 outcome of pulmonary tuberculosis. *Clinical Respiratory Journal* 2015;**9**:157–64.  
16 doi:10.1111/crj.12112  
17  
18 42 Valade S, Raskine L, Aout M, *et al.* Tuberculosis in the intensive care unit: A retrospective  
19 descriptive cohort study with determination of a predictive fatality score. *Canadian Journal*  
20 *of Infectious Diseases and Medical Microbiology* 2012;**23**:173–8. doi:10.1155/2012/361292  
21  
22 43 Wang Q, Han W, Niu J, *et al.* Prognostic value of serum macrophage migration inhibitory  
23 factor levels in pulmonary tuberculosis. *Respiratory Research* 2019;**20**:50.  
24 doi:10.1186/s12931-019-1004-3  
25  
26 44 Gupta-Wright A, Corbett EL, Wilson D, *et al.* Risk score for predicting mortality including  
27 urine lipoarabinomannan detection in hospital inpatients with HIV-associated tuberculosis in  
28 sub-Saharan Africa: Derivation and external validation cohort study. *PLoS Medicine*  
29 2019;**16**:1–20. doi:10.1371/journal.pmed.1002776  
30  
31 45 Zhang Z, Xu L, Pang X, *et al.* A Clinical scoring model to predict mortality in HIV/TB co-  
32 infected patients at end stage of AIDS in China: An observational cohort study. *BioScience*  
33 *Trends* 2019;**13**:136–44. doi:10.5582/bst.2018.01309  
34  
35 46 Podlekareva DN, Grint D, Post FA, *et al.* Health care index score and risk of death following  
36 tuberculosis diagnosis in HIV-positive patients. *International Journal of Tuberculosis and*  
37 *Lung Disease* 2013;**17**:198-206+i. doi:10.5588/ijtld.12.0224  
38  
39 47 Baussano I, Pivetta E, Vizzini L, *et al.* Predicting tuberculosis treatment outcome in a low-  
40 incidence area. *International Journal of Tuberculosis and Lung Disease* 2008;**12**:1441–8.  
41  
42 48 Costa-Veiga A, Briz T, Nunes C. Unsuccessful treatment in pulmonary tuberculosis: Factors  
43 and a consequent predictive model. *European Journal of Public Health* 2018;**28**:252–8.  
44 doi:10.1093/eurpub/ckx136  
45  
46 49 Niakan Kalhori SR, Nasehi M, Zeng XJ. A logistic regression model to predict high risk  
47 patients to fail in tuberculosis treatment course completion. *IAENG International Journal of*  
48 *Applied Mathematics* 2010;**40**:1–6.  
49  
50 50 Kalhori SRN, Zeng X-J. PREDICTING THE OUTCOME OF TUBERCULOSIS  
51 TREATMENT COURSE IN FRAME OF DOTS - From Demographic Data to Logistic  
52  
53  
54  
55  
56  
57  
58  
59

- 1  
2  
3 Regression Model. In: *Proceedings of the International Conference on Health Informatics*.  
4 SciTePress - Science and Technology Publications 2009. 129–34.  
5 doi:10.5220/0001431401290134  
6
- 7  
8 51 Madan C, Chopra KK, Satyanarayana S, *et al*. Developing a model to predict unfavourable  
9 treatment outcomes in patients with tuberculosis and human immunodeficiency virus co-  
10 infection in Delhi, India. *PLoS ONE* 2018;**13**:e0204982. doi:10.1371/journal.pone.0204982  
11
- 12 52 Nguyen DT, Jenkins HE, Graviss EA. Prognostic score to predict mortality during TB  
13 treatment in TB / HIV co-infected patients. *PLoS ONE* 2018;**13**:1–12.  
14 doi:10.1371/journal.pone.0196022  
15
- 16 53 Nguyen DT, Graviss EA. Development and validation of a prognostic score to predict  
17 tuberculosis mortality. *Journal of Infection* 2018;**77**:283–90. doi:10.1016/j.jinf.2018.02.009  
18
- 19 54 Pefura-Yone EW, Balkissou AD, Poka-Mayap V, *et al*. Development and validation of a  
20 prognostic score during tuberculosis treatment. *BMC Infectious Diseases* 2017;**17**:1–9.  
21 doi:10.1186/s12879-017-2309-9  
22
- 23 55 Rodrigo T, Caylà JA, Casals M, *et al*. A predictive scoring instrument for tuberculosis lost to  
24 follow-up outcome. *Respiratory Research* 2012;**13**:1–9. doi:10.1186/1465-9921-13-75  
25
- 26 56 Hussain OA, Junejo KN. Predicting treatment outcome of drug-susceptible tuberculosis  
27 patients using machine-learning models. *Informatics for Health and Social Care*  
28 2019;**44**:135–51. doi:10.1080/17538157.2018.1433676  
29
- 30 57 Sauer CM, Sasson D, Paik KE, *et al*. Feature selection and prediction of treatment failure in  
31 tuberculosis. *PLoS ONE* 2018;**13**:1–14. doi:10.1371/journal.pone.0207491  
32
- 33 58 Wyk SSV, Lin HH, Claassens MM. A systematic review of prediction models for prevalent  
34 pulmonary tuberculosis in adults. *Int J Tuberc Lung Dis*; **21**.  
35
- 36 59 Huangfu P, Ugarte-Gil C, Golub J, *et al*. The effects of diabetes on tuberculosis treatment  
37 outcomes: an updated systematic review and meta-analysis. *The International Journal of*  
38 *Tuberculosis and Lung Disease* 2019;**23**:783–96. doi:10.5588/ijtld.18.0433  
39
- 40 60 Steyerberg EW. *Clinical Prediction Models*. New York, NY: : Springer New York 2009.  
41 doi:10.1007/978-0-387-77244-8  
42
- 43 61 Sharma SK, Dheda K. What is new in the WHO consolidated guidelines on drug-resistant  
44 tuberculosis treatment? *The Indian journal of medical research*. 2019;**149**:309–12.  
45 doi:10.4103/ijmr.IJMR\_579\_19  
46
- 47 62 Wolbers M, Koller MT, Wittman JCM, *et al*. Prognostic models with competing risks  
48 methods and application to coronary risk prediction. *Epidemiology* 2009;**20**:555–61.  
49 doi:10.1097/EDE.0b013e3181a39056  
50
- 51 63 National Tuberculosis Control Program. Manual for health personnel. Yaounde: 2012.  
52  
53  
54  
55  
56  
57  
58  
59  
60



- 1  
2  
3 64 Royston P, Moons KGM, Altman DG, *et al.* Prognosis and prognostic research: Developing  
4 a prognostic model. *BMJ (Online)* 2009;**338**:1373–7. doi:10.1136/bmj.b604  
5  
6  
7 65 Calster BV. A calibration hierarchy for risk models was defined: from utopia to empirical  
8 data. *Journal of Clinical Epidemiology* 2016;:10.  
9  
10 66 Janols H, Abate E, Idh J, *et al.* Early treatment response evaluated by a clinical scoring  
11 system correlates with the prognosis of pulmonary tuberculosis patients in Ethiopia: A  
12 prospective follow-up study. *Scandinavian Journal of Infectious Diseases* 2012;**44**:828–34.  
13 doi:10.3109/00365548.2012.694468  
14  
15 67 Rudolf F, Lemvik G, Abate E, *et al.* TBscore II: Refining and validating a simple clinical  
16 score for treatment monitoring of patients with pulmonary tuberculosis. *Scandinavian*  
17 *Journal of Infectious Diseases* 2013;**45**:825–36. doi:10.3109/00365548.2013.826876  
18  
19 68 Wejse C, Patsche CB, Kühle A, *et al.* Impact of HIV-1, HIV-2, and HIV-1+2 dual infection  
20 on the outcome of tuberculosis. *International journal of infectious diseases : IJID : official*  
21 *publication of the International Society for Infectious Diseases* 2015;**32**:128–34.  
22 doi:10.1016/j.ijid.2014.12.015  
23  
24 69 Aljohaney AA. Mortality of patients hospitalized for active tuberculosis in King Abdulaziz  
25 University Hospital, Jeddah, Saudi Arabia. *Saudi Medical Journal* 2018;**39**:267–72.  
26 doi:10.15537/smj.2018.3.22280  
27  
28 70 Bastos HN, Osório NS, Castro AG, *et al.* A prediction rule to stratify mortality risk of  
29 patients with pulmonary tuberculosis. *PLoS ONE* 2016;**11**:1–14.  
30 doi:10.1371/journal.pone.0162797  
31  
32 71 Gupta-Wright A, Corbett EL, Wilson D, *et al.* Risk score for predicting mortality including  
33 urine lipoarabinomannan detection in hospital inpatients with HIV-associated tuberculosis in  
34 sub-Saharan Africa: Derivation and external validation cohort study. *PLoS Medicine*  
35 2019;**16**:1–20. doi:10.1371/journal.pmed.1002776  
36  
37 72 Horita N, Miyazawa N, Yoshiyama T, *et al.* Development and validation of a tuberculosis  
38 prognostic score for smear-positive in-patients in Japan. *International Journal of*  
39 *Tuberculosis and Lung Disease* 2013;**17**:54–60. doi:10.5588/ijtld.12.0476  
40  
41 73 Podlekareva DN, Grint D, Post FA, *et al.* Health care index score and risk of death following  
42 tuberculosis diagnosis in HIV-positive patients. *The International Journal of Tuberculosis*  
43 *and Lung Disease* 2013;**17**:198–206. doi:10.5588/ijtld.12.0224  
44  
45 74 Wang Q, Han W, Niu J, *et al.* Prognostic value of serum macrophage migration inhibitory  
46 factor levels in pulmonary tuberculosis. *Respiratory Research* 2019;**20**:50.  
47 doi:10.1186/s12931-019-1004-3  
48  
49 75 Wejse C, Gustafson P, Nielsen J, *et al.* TBscore: Signs and symptoms from tuberculosis  
50 patients in a low-resource setting have predictive value and may be used to assess clinical  
51  
52  
53  
54  
55  
56  
57  
58  
59

1  
2  
3 course. *Scandinavian Journal of Infectious Diseases* 2008;**40**:111–20.  
4 doi:10.1080/00365540701558698  
5

- 6  
7 76 Mburu JW, Kingwara L, Ester M, *et al.* Use of classification and regression tree (CART), to  
8 identify hemoglobin A1C (HbA1C) cut-off thresholds predictive of poor tuberculosis  
9 treatment outcomes and associated risk factors. *Journal of Clinical Tuberculosis and Other*  
10 *Mycobacterial Diseases* 2018;**11**:10–6. doi:10.1016/j.jctube.2018.01.002  
11  
12 77 Thompson EG, Du Y, Malherbe ST, *et al.* Host blood RNA signatures predict the outcome of  
13 tuberculosis treatment. *Tuberculosis* 2017;**107**:48–58. doi:10.1016/j.tube.2017.08.004  
14  
15 78 Chee CBE, Boudville IC, Chan SP, *et al.* Patient and disease characteristics, and outcome of  
16 treatment defaulters from the Singapore TB control unit - A one-year retrospective survey.  
17 *International Journal of Tuberculosis and Lung Disease* 2000;**4**:496–503.  
18  
19 79 Rodrigo T, Caylà JA, Casals M, *et al.* A predictive scoring instrument for tuberculosis lost to  
20 follow-up outcome. *Respiratory Research* 2012;**13**:1–9. doi:10.1186/1465-9921-13-75  
21  
22 80 Kalhori SRN, Zeng X-J. Fuzzy Logic Approach to Predict the Outcome of Tuberculosis  
23 Treatment Course Destination. In: *Lecture Notes in Engineering and Computer Science*. NA  
24 2009. 774–8. doi:NA  
25  
26  
27  
28  
29  
30  
31  
32  
33  
34  
35  
36  
37  
38  
39  
40  
41  
42  
43  
44  
45  
46  
47  
48  
49  
50  
51  
52  
53  
54  
55  
56  
57  
58  
59  
60

**Table 1.** World Health Organization definition of treatment outcomes for TB patients

| Outcome                      | Definition                                                                                                                                                                                                                                                          |
|------------------------------|---------------------------------------------------------------------------------------------------------------------------------------------------------------------------------------------------------------------------------------------------------------------|
| Treatment completion         | Completion of treatment without evidence of failure, but without documentation of a negative sputum smear or culture in the last month of treatment and/or on at least one previous occasion, either because tests were not done or because results are unavailable |
| Cure                         | Bacteriologic confirmation of a negative smear or culture at the end of TB treatment and on at least one previous occasion                                                                                                                                          |
| Treatment success            | Composite of cured and treatment completed                                                                                                                                                                                                                          |
| Treatment failure            | Sputum smear or culture is positive at month 5 or later during treatment                                                                                                                                                                                            |
| Death                        | TB patient who dies for any reason before starting or during the course of treatment                                                                                                                                                                                |
| Loss to follow-up            | TB patient who did not start treatment or whose treatment was interrupted for 2 consecutive months or more                                                                                                                                                          |
| Not evaluated (transfer out) | TB patient for whom no treatment outcome was assigned, which includes cases who “transferred out” to another treatment unit as well as cases for whom the treatment outcome is unknown to the reporting unit                                                        |

1  
2  
3 **Figure 1.** PRISMA (preferred reporting items for systematic reviews and meta-analyses) flow  
4 chart of inclusion process  
5

6  
7 **[See Figure 1]**  
8  
9

10  
11  
12  
13  
14  
15  
16  
17  
18  
19  
20  
21  
22  
23  
24  
25  
26  
27  
28  
29  
30  
31  
32  
33  
34  
35  
36  
37  
38  
39  
40  
41  
42  
43  
44  
45  
46  
47  
48  
49  
50  
51  
52  
53  
54  
55  
56  
57  
58  
59  
60

For peer review only

Table 2. Study characteristics

| First author, year              | Population                               | Study years          | Study design         | Location                          | Validation              | No. with outcome / sample size (%)                      | Predictors in final model                                                                                                                                                                                                                                              | Performance measures                                                                                                          | Model presentation | Risk of bias (population, predictor, outcome, analysis) |
|---------------------------------|------------------------------------------|----------------------|----------------------|-----------------------------------|-------------------------|---------------------------------------------------------|------------------------------------------------------------------------------------------------------------------------------------------------------------------------------------------------------------------------------------------------------------------------|-------------------------------------------------------------------------------------------------------------------------------|--------------------|---------------------------------------------------------|
| Death                           |                                          |                      |                      |                                   |                         |                                                         |                                                                                                                                                                                                                                                                        |                                                                                                                               |                    |                                                         |
| Abdelbary[9] / 2017             | TB cases                                 | 2006 - 2013          | Retrospective cohort | Mexico                            | Internal (split-sample) | Development: 261/4216 (6%)<br>Validation: 260/4215 (6%) | Age (<41, 41-65, ≥65), sex, MDR, HIV, malnutrition, alcoholism, diabetes, pulmonary TB                                                                                                                                                                                 | c-statistic = 0.70<br>Sensitivity = 60%<br>Specificity = 71%                                                                  | Risk score         | Low, High, Low, High                                    |
| Abdelbary[9] / 2017 (TB-DM)     | TB-DM cases                              | 2006 - 2013          | Retrospective cohort | Mexico                            | None                    | 88/2121 (4%)                                            | Sex, malnutrition, BCG vaccinated, AFB smear (positive vs. negative)                                                                                                                                                                                                   | c-statistic = 0.68                                                                                                            | Risk score         | Unclear, High, Low, High                                |
| Aljohaney[69] / 2018            | Hospitalized TB patients                 | Dec 2011 – Dec 2016  | Retrospective cohort | Saudi Arabia                      | None                    | 41/291 (14%)                                            | Clinical model: Age, congestive heart failure<br>Clinical + lab model: * Age > 65, congestive heart failure, bilateral disease on chest xray                                                                                                                           | Clinical model: Accuracy = 86%<br>Clinical & lab model: * Accuracy = 90%                                                      | Odds ratios        | Unclear, Unclear, Unclear, High                         |
| Bastos[70] / 2016               | Inpatient and outpatient TB cases on DOT | 2007 - 2013          | Retrospective cohort | Portugal                          | External (setting)      | Development: 121/681 (18%)<br>Validation: 24/103 (23%)  | Hypoxemic respiratory failure, age (≥50 vs. <50), bilateral involvement, comorbidities (at least one of HIV, diabetes, liver at least one of: HIV, diabetes, liver failure/cirrhosis, congestive heart failure, chronic respiratory disease), hemoglobin (<12 vs. ≥12) | AUROC = 0.84 (95% CI: 0.76-0.93)<br>Sensitivity = 41.8%<br>Specificity = 92.1%                                                | Risk score         | Low, Unclear, Low, High                                 |
| Gupta-Wright[71] / 2019         | Hospitalized TB-HIV patients             | Oct 2015 – Sept 2017 | Retrospective cohort | Malawi and South Africa           | External (setting)      | Development: 94/315 (30%)<br>Validation: 147/644 (23%)  | Sex, age 55+, currently taking ART, ability to walk unaided, severe anemia, positive TB-LAM                                                                                                                                                                            | c-statistic = 0.68 (95% CI: 0.61-0.74)<br>HL test: p=0.13<br>Calibration plot                                                 | Risk score         | Low, Low, Low, High                                     |
| Horita[72] / 2013               | Hospitalized TB patients                 | Jan 2008 – Jul 2011  | Retrospective cohort | Japan                             | External (setting)      | Development: 36/179 (20%)<br>Validation: 48/244 (20%)   | Age, oxygen requirement, albumin, activities of daily living                                                                                                                                                                                                           | AUROC = 0.893<br>Sensitivity = 0.92<br>Specificity = 0.73                                                                     | Risk score         | Low, Low, Low, High                                     |
| Koegelenberg[40] / 2015         | Hospitalized TB patients                 | Jan 2012 – May 2013  | Retrospective cohort | South Africa                      | None                    | 38/83 (46%)                                             | Septic shock, HIV with CD4 < 200, creatinine > 140 (male) or >120 (female), P:F O2 ratio < 200, chest radiograph showing miliary pattern/parenchymal infiltrates, absence of TB treatment at admission                                                                 | Mean score in survivors: 2.27 (SD=1.47)<br>Mean score in non-survivors: 3.58 (SD=1.08)                                        | Risk score         | Low, Low, Low, High                                     |
| Nguyen[53] (general pop) / 2018 | TB cases                                 | Jan 2010 – Dec 2016  | Retrospective cohort | Texas                             | Internal (split-sample) | Development: 253/3378 (7%)<br>Validation: 270/3377 (8%) | Age group (15-44, 44-64, >64), US born, homeless, resident of long term care facility, chronic kidney failure, meningial TB, miliary TB, HIV positive, HIV unknown                                                                                                     | AUROC = 0.80 (95% CI: 0.77-0.82)<br>HL test: X <sup>2</sup> =6.3, p=0.613                                                     | Risk score         | Low, Unclear, Unclear, High                             |
| Nguyen[37] (TB-DM) / 2019       | TB-DM patients                           | Jan 2010 – Dec 2016  | Retrospective cohort | Texas                             | Internal (bootstrap)    | 112/1227 (9%)                                           | Age ≥65, US-born, homeless, IDU, chronic kidney failure, TB meningitis, Miliary TB, AFB positive smear, HIV positive                                                                                                                                                   | AUROC = 0.82 (95% CI: 0.78-0.87)<br>HL test: X <sup>2</sup> =4.54, p=0.81<br>Brier score=0.07                                 | Risk score         | Unclear, Unclear, Unclear, High                         |
| Nguyen[52] (TB-HIV) / 2018      | TB-HIV patients                          | Jan 2010 – Dec 2016  | Retrospective cohort | Texas                             | Internal (bootstrap)    | 57/450 (13%)                                            | Age ≥ 45, resident of LTCF, meningial TB, abnormal CXR, diagnosis confirmed by positive culture of NAA, culture not converted or unknown                                                                                                                               | AUROC = 0.79 (95% CI 0.70-0.87)<br>HL test: X <sup>2</sup> =4.25, p=0.51<br>Brier score: 0.09                                 | Risk score         | Low, High, Unclear, High                                |
| Pefura-Yone[54] / 2017          | TB patients                              | Jan 2012 – Dec 2013  | Retrospective cohort | Cameroon                          | Internal (bootstrap)    | 213/2250 (9%)                                           | Age, adjusted BMI, clinical form (PTB+, PTB-, EPTB), HIV                                                                                                                                                                                                               | C-statistic: 0.808<br>HL test: X <sup>2</sup> =6.44, p=0.60<br>Sensitivity = 80.7%<br>Specificity = 68.2%<br>Calibration plot | Model coefficients | Low, Low, Low, High                                     |
| Podlekareva[73] / 2013          | TB/HIV patients                          | Jan 2004 – Dec 2006  | Retrospective cohort | 52 cities in Europe and Argentina | None                    | 995†                                                    | DST performed, treatment with RHZ, and cART at/near TB diagnosis                                                                                                                                                                                                       | Crude RH = 0.62 (95% CI: 0.64-0.84)                                                                                           | Risk score         | Low, Unclear, Low, High                                 |
| Valade[42] / 2012               | Hospitalized TB patients                 | Mar 2000 – Jul 2009  | Retrospective cohort | France                            | Internal (bootstrap)    | 20/53 (38%)                                             | Miliary TB, catecholamine infusion, mechanical ventilation on admission                                                                                                                                                                                                | AUROC = 0.92 (95% CI: 0.85-0.98)<br>Brier score = 0.13                                                                        | Risk score         | Unclear, Low,                                           |

|    |                              |                                                                    |                     |                         |               |                                                    |                                                              |                                                                                                                                                                                                                                                                                                                                                                                                           |                                                                                                                                                       |                                           |                                          |
|----|------------------------------|--------------------------------------------------------------------|---------------------|-------------------------|---------------|----------------------------------------------------|--------------------------------------------------------------|-----------------------------------------------------------------------------------------------------------------------------------------------------------------------------------------------------------------------------------------------------------------------------------------------------------------------------------------------------------------------------------------------------------|-------------------------------------------------------------------------------------------------------------------------------------------------------|-------------------------------------------|------------------------------------------|
| 1  |                              |                                                                    |                     |                         |               |                                                    |                                                              | Optimism = 0.03<br>Accuracy = 85%<br>Sensitivity = 75%<br>Specificity = 91%                                                                                                                                                                                                                                                                                                                               |                                                                                                                                                       | Low,<br>High                              |                                          |
| 2  |                              |                                                                    |                     |                         |               |                                                    |                                                              |                                                                                                                                                                                                                                                                                                                                                                                                           |                                                                                                                                                       |                                           |                                          |
| 3  | Wang[74] / 2019              | HIV-negative, culture-confirmed, pulmonary TB cases                | Jan 2014 – Dec 2016 | Prospective cohort      | China         | External (setting)                                 | Development: 36/287 (13%)<br>Validation: 15/104 (14%)        | Age, cavitary lesion, pleural effusion, drug resistance, disseminated, albumin, c-reactive protein, white blood cell count, IL-6, MIF                                                                                                                                                                                                                                                                     | AUROC = 0.85 ± 0.028                                                                                                                                  | Odds ratios                               | Low,<br>Low,<br>Low,<br>High             |
| 4  |                              |                                                                    |                     |                         |               |                                                    |                                                              |                                                                                                                                                                                                                                                                                                                                                                                                           |                                                                                                                                                       |                                           |                                          |
| 5  | Wejse[75] / 2008             | Pulmonary TB patients on DOT                                       | 1996 - 2001         | Retrospective cohort    | Guinea Bissau | None                                               | 100/698 (14%)                                                | Cough, hemoptysis, dyspnea, chest pain, night sweating, anemia conjunctivae, tachycardia, positive funding at lung auscultation, temperature >37, BMI <18, BMI<16, MUAC<220, MUAC<200                                                                                                                                                                                                                     | AUROC = 0.65 (95% CI: 0.6-0.7)<br>Sensitivity = 0.45<br>Specificity = 0.75                                                                            | Risk score                                | Low,<br>High,<br>Low,<br>High            |
| 6  |                              |                                                                    |                     |                         |               |                                                    |                                                              |                                                                                                                                                                                                                                                                                                                                                                                                           |                                                                                                                                                       |                                           |                                          |
| 7  | Zhang[45] / 2019             | TB/HIV patients at end stage of AIDS                               | Aug 2009 – Jan 2018 | Retrospective cohort    | China         | Internal (split-sample)                            | Development: 157/807 (19%)<br>Validation: 40/200 (20%)       | Anemia, TB meningitis, severe pneumonia, hypoalbuminemia, unexplained infection or space-occupying lesions, malignancy                                                                                                                                                                                                                                                                                    | AUROC = 0.867 (95% CI: 0.832-0.902)<br>Sensitivity = 79.6%<br>Specificity = 82.9%                                                                     | Risk score                                | Low,<br>Low,<br>Low,<br>High             |
| 8  |                              |                                                                    |                     |                         |               |                                                    |                                                              |                                                                                                                                                                                                                                                                                                                                                                                                           |                                                                                                                                                       |                                           |                                          |
| 9  | 11 Treatment failure         |                                                                    |                     |                         |               |                                                    |                                                              |                                                                                                                                                                                                                                                                                                                                                                                                           |                                                                                                                                                       |                                           |                                          |
| 10 |                              |                                                                    |                     |                         |               |                                                    |                                                              |                                                                                                                                                                                                                                                                                                                                                                                                           |                                                                                                                                                       |                                           |                                          |
| 11 | Abdelbary[9] / 2017          | TB cases                                                           | 2006 - 2013         | Retrospective cohort    | Mexico        | Internal (split-sample)                            | Development: 2109†<br>Validation: 6322†                      | Education (no or low vs. higher than primary school), MDR, AFB smear (>+2, +1, negative)                                                                                                                                                                                                                                                                                                                  | c-statistic = 0.65<br>Sensitivity = 52%<br>Specificity = 66%                                                                                          | Risk score                                | Low,<br>High,<br>Low,<br>High            |
| 12 |                              |                                                                    |                     |                         |               |                                                    |                                                              |                                                                                                                                                                                                                                                                                                                                                                                                           |                                                                                                                                                       |                                           |                                          |
| 13 | Kalhor[49] (logistic) / 2010 | TB cases at DOTS registration                                      | 2005                | Retrospective cohort    | Iran          | Internal (split-sample)                            | Development: 828/4836 (17%)<br>Validation: 2418†             | Gender, age, weight nationality, prison, case type                                                                                                                                                                                                                                                                                                                                                        | AUROC = 0.70<br>Accuracy = 81.64%<br>HL test: X <sup>2</sup> =11.935, df=8, p=0.154                                                                   | Model coefficients                        | Unclear,<br>Unclear,<br>Unclear,<br>High |
| 14 |                              |                                                                    |                     |                         |               |                                                    |                                                              |                                                                                                                                                                                                                                                                                                                                                                                                           |                                                                                                                                                       |                                           |                                          |
| 15 | Keane[30] / 1997             | Smear-positive TB patients on standard first-line regimen with DOT | 1990 - 1995         | Non-nested case control | Vietnam       | None                                               | 130/803 (16%)                                                | 3 month model: Extensive lesions, mediastinal shift, average smear score 3rd month, weight, progressive x-ray, any previous treatment<br>Baseline model: Mediastinal shift, average smear score, extensive lesions, any previous treatment, cavities, weight                                                                                                                                              | 3 month:<br>Sensitivity = 80%<br>Specificity = 80%<br>Baseline:<br>Sensitivity = 70%<br>Specificity = 80%                                             | Model coefficients                        | High,<br>Unclear,<br>Unclear,<br>High    |
| 16 |                              |                                                                    |                     |                         |               |                                                    |                                                              |                                                                                                                                                                                                                                                                                                                                                                                                           |                                                                                                                                                       |                                           |                                          |
| 17 | Luijes[33] / 2017            | Smear-positive pulmonary TB cases on DOT                           | May 1999 – Jul 2002 | Nested case-control     | South Africa  | Internal (cross-validation)                        | 10/31 (32%)                                                  | 3,5-Dihydroxybenzoic acid, (3-(4-Hydroxy-3-methoxyphenyl) propionic acid                                                                                                                                                                                                                                                                                                                                  | AUROC = 0.89 (95% CI: 0.7-1.00)                                                                                                                       | Model coefficients                        | High,<br>Unclear,<br>Unclear,<br>High    |
| 18 |                              |                                                                    |                     |                         |               |                                                    |                                                              |                                                                                                                                                                                                                                                                                                                                                                                                           |                                                                                                                                                       |                                           |                                          |
| 19 | Mburu[76] / 2018             | Smear-positive TB patients                                         | Feb 2014 – Aug 2015 | Prospective cohort      | Kenya         | Internal (cross-validation)                        | 13/321 (4%)                                                  | HbA1c, regimen (retreatment), age, weight, random blood glucose, BMI, BUN, HIV positive result, ever smoker, creatinine                                                                                                                                                                                                                                                                                   | AUROC = 0.56 ± 0.07                                                                                                                                   | Relative score                            | Low,<br>Low,<br>Low,<br>High             |
| 20 |                              |                                                                    |                     |                         |               |                                                    |                                                              |                                                                                                                                                                                                                                                                                                                                                                                                           |                                                                                                                                                       |                                           |                                          |
| 21 | 27 Default                   |                                                                    |                     |                         |               |                                                    |                                                              |                                                                                                                                                                                                                                                                                                                                                                                                           |                                                                                                                                                       |                                           |                                          |
| 22 |                              |                                                                    |                     |                         |               |                                                    |                                                              |                                                                                                                                                                                                                                                                                                                                                                                                           |                                                                                                                                                       |                                           |                                          |
| 23 | Thompson[77] / 2017          | HIV uninfected adults with newly diagnosed pulmonary TB            | Apr 2010 – Apr 2013 | Retrospective cohort    | South Africa  | Internal (cross-validation) and external (setting) | 6/99 (6%)                                                    | 18 splice junctions and 13 genes                                                                                                                                                                                                                                                                                                                                                                          | AUROC (internal) = 0.87<br>AUROC (external) = 0.63                                                                                                    | Heatmap of differentially expressed genes | Low,<br>Low,<br>Low,<br>High             |
| 24 |                              |                                                                    |                     |                         |               |                                                    |                                                              |                                                                                                                                                                                                                                                                                                                                                                                                           |                                                                                                                                                       |                                           |                                          |
| 25 | Abdelbary[9] / 2017 (TB-DM)  | TB cases                                                           | 2006 - 2013         | Retrospective cohort    | Mexico        | None                                               | 93/2121 (4%)                                                 | Age (<40 vs. ≥40), sex, HIV                                                                                                                                                                                                                                                                                                                                                                               | c-statistic= 0.62                                                                                                                                     | Risk score                                | Unclear,<br>High,<br>Unclear,<br>High    |
| 26 |                              |                                                                    |                     |                         |               |                                                    |                                                              |                                                                                                                                                                                                                                                                                                                                                                                                           |                                                                                                                                                       |                                           |                                          |
| 27 | Belilovsky[35] / 2010        | Hospitalized TB patients                                           | 1993 - 2002         | Retrospective cohort    | Russia        | External (geographical)                            | Development: 1326/3904 (34%)<br>Validation: 4662/12803 (36%) | Sex, unemployment, retreatment case, alcohol abuse (yes, no, data), severe TB form, residence (urban vs. rural), age (25-50 vs. other), pulmonary TB (vs extrapulmonary), prison history                                                                                                                                                                                                                  | Belgrood: AUROC = 0.75<br>Orel: AUROC = 0.75<br>Pskov: AUROC = 0.78<br>Yaroslavi: AUROC = 0.75<br>Calibration table                                   | Model coefficients                        | Unclear,<br>High,<br>High,<br>High       |
| 28 |                              |                                                                    |                     |                         |               |                                                    |                                                              |                                                                                                                                                                                                                                                                                                                                                                                                           |                                                                                                                                                       |                                           |                                          |
| 29 | Chang[31] / 2004             | All tuberculosis patients                                          | Jan 1999 – Mar 1999 | Nested case-control     | China         | None                                               | 102/408 (25%)                                                | Baseline:* Ever smoker (current, former, never), retreatment (history of default, no history of default, not)<br>Longitudinal: Smoking status (current, former, never), retreatment (with history of default, without history of default, never), unsatisfactory adherence in first two months (good, poor, fair, unknown), subsequent hospitalization, treatment side effects in last month of treatment | Baseline:*<br>AUROC = 0.70 (95% CI: 0.63-0.76)<br>HL test: X <sup>2</sup> = 1.448, df=5, p=0.919<br>Longitudinal:<br>AUROC = 0.85 (95% CI: 0.80-0.90) | Odds ratios                               | High,<br>High,<br>Low,<br>High           |
| 30 |                              |                                                                    |                     |                         |               |                                                    |                                                              |                                                                                                                                                                                                                                                                                                                                                                                                           |                                                                                                                                                       |                                           |                                          |

|    |                                 |                                                                      |                                   |                         |                                                |                         |                                                        |                                                                                                                                                                                                                                                                                                                                                                                                                                                                                                                                                                                                                                                                                                                           |                                                                                     |                    |                                 |
|----|---------------------------------|----------------------------------------------------------------------|-----------------------------------|-------------------------|------------------------------------------------|-------------------------|--------------------------------------------------------|---------------------------------------------------------------------------------------------------------------------------------------------------------------------------------------------------------------------------------------------------------------------------------------------------------------------------------------------------------------------------------------------------------------------------------------------------------------------------------------------------------------------------------------------------------------------------------------------------------------------------------------------------------------------------------------------------------------------------|-------------------------------------------------------------------------------------|--------------------|---------------------------------|
| 1  |                                 |                                                                      |                                   |                         |                                                |                         |                                                        | HL test: $X^2 = 5.887$ , $df=6$ , $p=0.436$                                                                                                                                                                                                                                                                                                                                                                                                                                                                                                                                                                                                                                                                               |                                                                                     |                    |                                 |
| 2  | Chee[78] / 2000                 | TB cases                                                             | 1996                              | Nested case-control     | Singapore                                      | None                    | 38/71 (54%)                                            | Chinese race, extent of family support, treatment duration                                                                                                                                                                                                                                                                                                                                                                                                                                                                                                                                                                                                                                                                | Accuracy = 74.6%                                                                    | Model coefficients | High, Unclear, High, High       |
| 4  |                                 |                                                                      |                                   |                         |                                                |                         |                                                        |                                                                                                                                                                                                                                                                                                                                                                                                                                                                                                                                                                                                                                                                                                                           | AUROC = 0.85 (95% CI: 0.80-0.90)                                                    |                    | High, High, High, High          |
| 5  | Cherkaoui[29] / 2014            | TB patients with definite or probable pulmonary or extrapulmonary TB | Jun 2010 – Oct 2011               | Non-nested case-control | Morocco                                        | None                    | 91/277 (33%)                                           | Age <50, work interfering with ability to take TB treatment, retreatment regimen, daily DOT, moderate or severe side effects, told friends about TB, current smoker, never smoker, symptom resolution in <2 months, knowledge of TB treatment duration                                                                                                                                                                                                                                                                                                                                                                                                                                                                    | Sensitivity = 82.4%<br>Specificity = 87.6%<br>HL test: $X^2=0.77$ , $p$ -value=1.00 | Survey tool        | High, High, High, High          |
| 8  |                                 |                                                                      |                                   |                         |                                                |                         |                                                        |                                                                                                                                                                                                                                                                                                                                                                                                                                                                                                                                                                                                                                                                                                                           | AUROC = 0.67 (95% CI: 0.65-0.70)                                                    |                    | Low, Low, Low, High             |
| 9  | Rodrigo[79] / 2012              | New TB cases                                                         | Jan 2006 – Dec 2009               | Prospective cohort      | Spain                                          | Internal (split-sample) | Development: 92/1490 (6%)<br>Validation: 103/1589 (6%) | Immigrant, living alone, living in an institution, previous TB treatment, linguistic barriers (poor understanding), IV drug use, unknown IV drug use                                                                                                                                                                                                                                                                                                                                                                                                                                                                                                                                                                      | Sensitivity = 65.05%<br>Specificity = 67.36%                                        | Risk score         | Low, Low, Low, High             |
| 11 | Unfavorable outcome             |                                                                      |                                   |                         |                                                |                         |                                                        |                                                                                                                                                                                                                                                                                                                                                                                                                                                                                                                                                                                                                                                                                                                           |                                                                                     |                    |                                 |
| 12 |                                 |                                                                      |                                   |                         |                                                |                         |                                                        |                                                                                                                                                                                                                                                                                                                                                                                                                                                                                                                                                                                                                                                                                                                           |                                                                                     |                    |                                 |
| 13 | Kalhor[50] (predicting) / 2009† | TB patients at DOT registration                                      | 2005                              | Retrospective cohort    | Iran                                           | Internal (split-sample) | Development: 6920†<br>Validation: 2966†                | Age, gender, nationality, prison, area, weight                                                                                                                                                                                                                                                                                                                                                                                                                                                                                                                                                                                                                                                                            | Classification rate = 89.8%<br>R2 = 0.45                                            | Model coefficients | Unclear, Unclear, Unclear, High |
| 15 |                                 |                                                                      |                                   |                         |                                                |                         |                                                        |                                                                                                                                                                                                                                                                                                                                                                                                                                                                                                                                                                                                                                                                                                                           |                                                                                     |                    |                                 |
| 16 |                                 |                                                                      |                                   |                         |                                                |                         |                                                        |                                                                                                                                                                                                                                                                                                                                                                                                                                                                                                                                                                                                                                                                                                                           | FS:*                                                                                |                    |                                 |
| 17 |                                 |                                                                      |                                   |                         |                                                |                         |                                                        |                                                                                                                                                                                                                                                                                                                                                                                                                                                                                                                                                                                                                                                                                                                           | AUROC = 0.74 (95% CI: 0.66-0.82)                                                    |                    |                                 |
| 18 |                                 |                                                                      |                                   |                         |                                                |                         |                                                        |                                                                                                                                                                                                                                                                                                                                                                                                                                                                                                                                                                                                                                                                                                                           | Sensitivity = 0.36                                                                  |                    |                                 |
| 19 |                                 |                                                                      |                                   |                         |                                                |                         |                                                        |                                                                                                                                                                                                                                                                                                                                                                                                                                                                                                                                                                                                                                                                                                                           | Specificity = 0.89                                                                  |                    |                                 |
| 20 |                                 |                                                                      |                                   |                         |                                                |                         |                                                        |                                                                                                                                                                                                                                                                                                                                                                                                                                                                                                                                                                                                                                                                                                                           | Misclassification = 0.24                                                            |                    |                                 |
| 21 |                                 |                                                                      |                                   |                         |                                                |                         |                                                        |                                                                                                                                                                                                                                                                                                                                                                                                                                                                                                                                                                                                                                                                                                                           | BE:                                                                                 |                    |                                 |
| 22 |                                 |                                                                      |                                   |                         |                                                |                         |                                                        |                                                                                                                                                                                                                                                                                                                                                                                                                                                                                                                                                                                                                                                                                                                           | AUROC = 0.73 (95% CI: 0.65-0.81)                                                    |                    |                                 |
| 23 |                                 |                                                                      |                                   |                         |                                                |                         |                                                        |                                                                                                                                                                                                                                                                                                                                                                                                                                                                                                                                                                                                                                                                                                                           | Sensitivity = 0.3                                                                   |                    |                                 |
| 24 |                                 |                                                                      |                                   |                         |                                                |                         |                                                        |                                                                                                                                                                                                                                                                                                                                                                                                                                                                                                                                                                                                                                                                                                                           | Specificity = 0.88                                                                  |                    |                                 |
| 25 |                                 |                                                                      |                                   |                         |                                                |                         |                                                        |                                                                                                                                                                                                                                                                                                                                                                                                                                                                                                                                                                                                                                                                                                                           | Misclassification = 0.27                                                            |                    |                                 |
| 26 |                                 |                                                                      |                                   |                         |                                                |                         |                                                        |                                                                                                                                                                                                                                                                                                                                                                                                                                                                                                                                                                                                                                                                                                                           | SS:                                                                                 |                    |                                 |
| 27 |                                 |                                                                      |                                   |                         |                                                |                         |                                                        |                                                                                                                                                                                                                                                                                                                                                                                                                                                                                                                                                                                                                                                                                                                           | AUROC = 0.73 (95% CI: 0.65-0.81)                                                    |                    |                                 |
| 28 |                                 |                                                                      |                                   |                         |                                                |                         |                                                        |                                                                                                                                                                                                                                                                                                                                                                                                                                                                                                                                                                                                                                                                                                                           | Sensitivity = 0.30                                                                  |                    |                                 |
| 29 | Sauer[57] / 2018†               | TB cases                                                             | Data available through March 2018 | Retrospective cohort    | Azerbaijan, Belarus, Georgia, Moldova, Romania | Internal (split-sample) | Development: 103/411 (25%)<br>Validation: 44/176 (25%) | Forward selection (FS):*<br>Drug sensitivity, employment status, smear microscopy, dissemination<br>Backwards elimination (BE):<br>Drug sensitivity, employment status, smear microscopy, dissemination<br>Stepwise selection (SS):<br>Drug sensitivity, employment status, smear microscopy, dissemination<br>Lasso:<br>Country, employment, extrapulmonary, cavity size, decrease in lung capacity, smear microscopy, drug sensitivity, chest imaging<br>Random forest (RF):<br>Top 5 by mean decrease accuracy: lung cavity size, type of resistance, employment status, country, total cavities<br>Top 5 by mean decrease Gini index: Age of onset, drug regimen, lung cavity size, number of daily contacts, culture | Misclassification = 0.27                                                            | List               | Unclear, Unclear, High          |
| 30 |                                 |                                                                      |                                   |                         |                                                |                         |                                                        |                                                                                                                                                                                                                                                                                                                                                                                                                                                                                                                                                                                                                                                                                                                           | AUROC = 0.72 (95% CI: 0.64-0.80)                                                    |                    |                                 |
| 31 |                                 |                                                                      |                                   |                         |                                                |                         |                                                        |                                                                                                                                                                                                                                                                                                                                                                                                                                                                                                                                                                                                                                                                                                                           | Sensitivity = 0.21                                                                  |                    |                                 |
| 32 |                                 |                                                                      |                                   |                         |                                                |                         |                                                        |                                                                                                                                                                                                                                                                                                                                                                                                                                                                                                                                                                                                                                                                                                                           | Specificity = 0.96                                                                  |                    |                                 |
| 33 |                                 |                                                                      |                                   |                         |                                                |                         |                                                        |                                                                                                                                                                                                                                                                                                                                                                                                                                                                                                                                                                                                                                                                                                                           | Misclassification = 0.23                                                            |                    |                                 |
| 34 |                                 |                                                                      |                                   |                         |                                                |                         |                                                        |                                                                                                                                                                                                                                                                                                                                                                                                                                                                                                                                                                                                                                                                                                                           | RF:                                                                                 |                    |                                 |
| 35 |                                 |                                                                      |                                   |                         |                                                |                         |                                                        |                                                                                                                                                                                                                                                                                                                                                                                                                                                                                                                                                                                                                                                                                                                           | AUROC = 0.73 (95% CI: 0.65-0.81)                                                    |                    |                                 |
| 36 |                                 |                                                                      |                                   |                         |                                                |                         |                                                        |                                                                                                                                                                                                                                                                                                                                                                                                                                                                                                                                                                                                                                                                                                                           | Sensitivity = 0.30                                                                  |                    |                                 |
| 37 |                                 |                                                                      |                                   |                         |                                                |                         |                                                        |                                                                                                                                                                                                                                                                                                                                                                                                                                                                                                                                                                                                                                                                                                                           | Specificity = 0.88                                                                  |                    |                                 |
| 38 |                                 |                                                                      |                                   |                         |                                                |                         |                                                        |                                                                                                                                                                                                                                                                                                                                                                                                                                                                                                                                                                                                                                                                                                                           | Misclassification = 0.27                                                            |                    |                                 |
| 39 |                                 |                                                                      |                                   |                         |                                                |                         |                                                        |                                                                                                                                                                                                                                                                                                                                                                                                                                                                                                                                                                                                                                                                                                                           | SVM linear:                                                                         |                    |                                 |
| 40 |                                 |                                                                      |                                   |                         |                                                |                         |                                                        |                                                                                                                                                                                                                                                                                                                                                                                                                                                                                                                                                                                                                                                                                                                           | AUROC = 0.69 (95% CI: 0.60-0.77)                                                    |                    |                                 |
| 41 |                                 |                                                                      |                                   |                         |                                                |                         |                                                        |                                                                                                                                                                                                                                                                                                                                                                                                                                                                                                                                                                                                                                                                                                                           | Sensitivity = 0.21                                                                  |                    |                                 |
| 42 |                                 |                                                                      |                                   |                         |                                                |                         |                                                        |                                                                                                                                                                                                                                                                                                                                                                                                                                                                                                                                                                                                                                                                                                                           | Specificity = 0.94                                                                  |                    |                                 |
| 43 |                                 |                                                                      |                                   |                         |                                                |                         |                                                        |                                                                                                                                                                                                                                                                                                                                                                                                                                                                                                                                                                                                                                                                                                                           | Misclassification = 0.24                                                            |                    |                                 |
| 44 |                                 |                                                                      |                                   |                         |                                                |                         |                                                        |                                                                                                                                                                                                                                                                                                                                                                                                                                                                                                                                                                                                                                                                                                                           | SVM polynomial:                                                                     |                    |                                 |
| 45 |                                 |                                                                      |                                   |                         |                                                |                         |                                                        |                                                                                                                                                                                                                                                                                                                                                                                                                                                                                                                                                                                                                                                                                                                           | AUROC = 0.69 (95% CI: 0.60-0.77)                                                    |                    |                                 |
| 46 |                                 |                                                                      |                                   |                         |                                                |                         |                                                        |                                                                                                                                                                                                                                                                                                                                                                                                                                                                                                                                                                                                                                                                                                                           | Sensitivity = 0                                                                     |                    |                                 |
| 47 |                                 |                                                                      |                                   |                         |                                                |                         |                                                        |                                                                                                                                                                                                                                                                                                                                                                                                                                                                                                                                                                                                                                                                                                                           | Specificity = 1                                                                     |                    |                                 |
|    |                                 |                                                                      |                                   |                         |                                                |                         |                                                        |                                                                                                                                                                                                                                                                                                                                                                                                                                                                                                                                                                                                                                                                                                                           | Misclassification = 0.25                                                            |                    |                                 |



|    |                                          |                                                     |                     |                      |          |                             |                                                                               |                                                                                                                                                                                                                                                                                                                                                                                                                                                                                     |                                                                                                                                                        |                    |                              |
|----|------------------------------------------|-----------------------------------------------------|---------------------|----------------------|----------|-----------------------------|-------------------------------------------------------------------------------|-------------------------------------------------------------------------------------------------------------------------------------------------------------------------------------------------------------------------------------------------------------------------------------------------------------------------------------------------------------------------------------------------------------------------------------------------------------------------------------|--------------------------------------------------------------------------------------------------------------------------------------------------------|--------------------|------------------------------|
| 1  | Baussano[47] / 2008 <sup>§</sup>         | Pulmonary TB cases                                  | 2001 - 2005         | Retrospective cohort | Italy    | Internal (bootstrap)        | 576/1242 (46%)                                                                | Residency (residential vs. homeless), sex, geographic origin (non-EU vs. EU), case definition (other than definite vs. definite), treatment setting (inpatient and unknown vs. outpatient), age (continuous)                                                                                                                                                                                                                                                                        | AUROC= 0.75<br>Calibration slope = 0.98<br>R <sup>2</sup> = 0.24                                                                                       | Nomogram           | Low, Unclear, Low, High      |
| 3  | Costa-Veiga[48] / 2017 <sup>§</sup>      | Pulmonary TB cases                                  | 2000 - 2012         | Retrospective cohort | Portugal | External (temporal)         | <i>Development:</i> 1152/10766 (11%)<br><i>Validation:</i> 4714 <sup>†</sup>  | HIV, previous treatment, age class (25-44, 15-24, 45-64, >64), IV drug use, pathologies (other disease comorbidity)                                                                                                                                                                                                                                                                                                                                                                 | AUROC = 75.9% (95% CI: 74.1-77.7)<br>Sensitivity = 71%<br>Specificity = 73%                                                                            | Nomogram           | Low, Low, Low, High          |
| 7  | Killian[34] / 2019 <sup>§</sup>          | TB patients (99DOTS program)                        | Feb 2017 – Sep 2018 | Retrospective cohort | India    | None                        | 433/4167 (10%)                                                                | <u>LEAP</u> :* Lstm rEal-time Adherence Predictor with 2 input layers, 1) LSTM with 64 hidden units and a dense layer with 48 units for the dense layer and 4 units for the penultimate layer<br><u>w-misses</u> : missed doses in last week<br><u>t-misses</u> : total missed doses in 35 days units and a dense layer with 48 units for the dense layer and 4 units for the penultimate layer<br><u>Random forest</u> : 150 trees and no max depth based on DAT from first 35 day | <u>LEAP</u> *<br>AUROC = 0.743<br><u>lw-misses</u> :<br>AUROC = 0.607<br><u>t-misses</u> :<br>AUROC = 0.630<br><u>Random forest</u> :<br>AUROC = 0.722 | None               | High, High, Unclear, High    |
| 13 | Madan[51] / 2018 <sup>§</sup>            | TB-HIV patients on DOT with first-line TB treatment | 2015                | Retrospective cohort | India    | None                        | 78/448 (17%)                                                                  | Sputum smear grade, previous TB, disease classification, HIV status, ART status, CD4 cell count, sex and age group (with interaction terms between age group and sex; sputum smear status and type of TB; HIV status at TB diagnosis and CD4 cell category).                                                                                                                                                                                                                        | AUROC = 0.783<br>HL test p-value = 0.149                                                                                                               | Model coefficients | Low, Low, Low, High          |
| 16 | Mburu[76] / 2018 <sup>§</sup>            | Smear-positive TB patients                          | Feb 2014 – Aug 2015 | Prospective cohort   | Kenya    | Internal (cross-validation) | 32/340 (9%)                                                                   | HbA1c, treatment regimen (retreatment), creatinine, BMI, BUN, weight, age, random blood glucose, HIV positive result, male gender                                                                                                                                                                                                                                                                                                                                                   | AUROC = 0.65 ± 0.06                                                                                                                                    | Relative score     | Low, Low, Low, High          |
| 19 | Other outcome                            |                                                     |                     |                      |          |                             |                                                                               |                                                                                                                                                                                                                                                                                                                                                                                                                                                                                     |                                                                                                                                                        |                    |                              |
| 20 | Kalhorji[80] (fuzzy) / 2009 <sup>§</sup> | TB patients at DOTS registration                    | 2005                | Retrospective cohort | Iran     | Internal (split-sample)     | <i>Development:</i> 7254 <sup>†</sup><br><i>Validation:</i> 2418 <sup>†</sup> | Case type, treatment category, risky sex, prison, sex, recent TB infection, diabetes, low body weight, TB type, length, previous imprisonment, age, area, HIV                                                                                                                                                                                                                                                                                                                       | Mean absolute percentage error = 1.24                                                                                                                  | Learned parameters | Unclear, Unclear, High, High |
| 24 | Hussain[56] / 2019 <sup>¶</sup>          | Pulmonary and extrapulmonary TB patients (TB Reach) | 2011 - 2014         | Retrospective cohort | Unknown  | Internal (split-sample)     | <i>Development:</i> 3371 <sup>†</sup><br><i>Validation:</i> 842 <sup>†</sup>  | Random forest*, artificial neural networks, and SVM                                                                                                                                                                                                                                                                                                                                                                                                                                 | <u>Random forest</u> :*<br>Accuracy = 76.32%                                                                                                           | None               | Unclear, Unclear, High       |

Abbreviations: AUROC=Area under receiver operating characteristic; c-statistic=concordance statistic; DOTS=Directly Observed Therapy, DM=Diabetes; HL=Hosmer-Lemeshow; TB=Tuberculosis;

\*Indicates best-performing/most relevant model, which is included throughout the manuscript (see methods section for details). Performance measures are reported for highest level of validation performed (ranked from strongest to weakest: external validation, internal validation, no validation). If internal and external validation were performed, both are reported.

<sup>†</sup>Outcome number unknown

<sup>‡</sup>Outcome is composite of death and treatment failure (losses to follow-up and not evaluated (unknown) outcomes were excluded)

<sup>§</sup>Outcome is composite of death, treatment failure, loss to follow-up, and not evaluated

<sup>¶</sup>Outcome is a value from 1 to 5 (1= patient completed the treatment course in frame of DOTS, 2=cured, 3= quit treatment, 4=failed treatment and 5=death)

<sup>||</sup>Outcome is treatment completion



**Table 3.** Characteristics of patient populations in the 33 included studies with prediction models for tuberculosis treatment outcomes

| Characteristic             | Studies reporting characteristic, n (% of total) | Categories                               | N(%) or Median [IQR] |
|----------------------------|--------------------------------------------------|------------------------------------------|----------------------|
| Sample size                | 33 (11)                                          | -                                        | 803 [291, 4167]      |
| Study duration, years      | 32 (97)                                          | -                                        | 4 [2,7]              |
| Study design               | 33 (100)                                         | Prospective cohort                       | 3 (9)                |
|                            |                                                  | Retrospective cohort                     | 25 (76)              |
|                            |                                                  | Nested case-control                      | 3 (9)                |
|                            |                                                  | Non-nested case-control                  | 2 (6)                |
| Data source                | 33 (100)                                         | Medical record                           | 6 (18)               |
|                            |                                                  | National registry or surveillance system | 13 (39)              |
|                            |                                                  | Local registry or surveillance system    | 1 (3)                |
|                            |                                                  | Regional registry or surveillance system | 2 (6)                |
|                            |                                                  | Data collect form for study purposes     | 11 (33)              |
| Study region               | 32 (97)                                          | Africa                                   | 8 (25)               |
|                            |                                                  | Asia                                     | 13 (41)              |
|                            |                                                  | Europe                                   | 6 (19)               |
|                            |                                                  | North America                            | 4 (12)               |
|                            |                                                  | South America                            | 0 (0)                |
|                            |                                                  | Global                                   | 1 (3)                |
| High burden TB setting*    | 31 (94)                                          | All                                      | 143(42)              |
|                            |                                                  | Some                                     | 1 (3)                |
|                            |                                                  | None                                     | 17 (55)              |
| Missing data               | 18 (54)                                          | Complete case-analysis                   | 9 (50)               |
|                            |                                                  | Missing indicator method                 | 4 (22)               |
|                            |                                                  | Heckman's method                         | 1 (6)                |
|                            |                                                  | Simple imputation                        | 2 (12)               |
|                            |                                                  | Sensitivity analysis with imputation     | 1 (6)                |
|                            |                                                  | Other                                    | 1 (5)                |
| Number of models developed | 33 (100)                                         | 1                                        | 25 (76)              |
|                            |                                                  | 2                                        | 4 (12)               |
|                            |                                                  | 3                                        | 1 (3)                |

|                                       |        |                                    |        |
|---------------------------------------|--------|------------------------------------|--------|
|                                       |        | 4                                  | 2 (6)  |
|                                       |        | 7                                  | 1 (3)  |
| Reasons for multiple models developed | 8 (24) | Different outcomes                 | 1 (12) |
|                                       |        | Different predictors considered    | 4 (50) |
|                                       |        | Different methods                  | 2 (25) |
|                                       |        | Different outcomes                 | 1 (12) |
|                                       |        | Different populations and outcomes | 1 (12) |

\*Determined based on study location and WHO list of 30 high-burden TB countries in the 2019 Global Tuberculosis Report (1).

**Table 4.** Study population characteristics of 33 included studies

| Characteristic                 | Included? |    |         | Median [IQR] <sup>‡</sup> , n |
|--------------------------------|-----------|----|---------|-------------------------------|
|                                | Yes       | No | Unknown |                               |
| Age*                           | -         | -  | 15      | 41 [37-49], n=18              |
| HIV                            | 18        | 7  | 8       | 23% [10-100], n=17            |
| Diabetes                       | 13        | 1  | 19      | 12% [5-21], n=11              |
| MDR                            | 8         | 7  | 18      | 1% [1-3], n=8                 |
| Other drug resistance          | 12        | 1  | 20      | 6% [4-12], n=10               |
| Extrapulmonary TB <sup>†</sup> | 22        | 4  | 7       | 11% [4-17], n=16              |
| Previous TB                    | 20        | 1  | 12      | 19% [9-30], n=17              |
| DOT                            | 14        | 0  | 19      | 100% [100-100], n=14          |
| Hospitalized patients          | 13        | 1  | 19      | 100% [100-100], n=10          |

Abbreviations: DOT=directly observed therapy; IQR=interquartile range; MDR=multi-drug resistance; TB=tuberculosis

\*Based on the measure of central tendency reported in the study (mean: n=11; median: n=7)

<sup>†</sup>Forms of extrapulmonary TB differ by study but included some of the following: Miliary, meningeal, pleural, peritoneal, disseminated, blood/bone, abdominal

<sup>‡</sup>Other than age (which is reported in years), this is the percentage of the population that has the characteristic among studies that include patients with the characteristic. For example, among the 18 studies that include persons with HIV, 17 report how many people had HIV and among those, the median percentage of the population with HIV is 23%.

**Table 5.** Methods reported for the 37 models of the 33 included studies with prediction models for tuberculosis treatment outcomes

| Characteristic                                            | Studies reporting characteristic, n (%) | Categories                                            | N(%) or median [IQR]      |
|-----------------------------------------------------------|-----------------------------------------|-------------------------------------------------------|---------------------------|
| Type of outcome                                           | 37 (100)                                | Single                                                | 29 (78)                   |
|                                                           |                                         | Composite                                             | 8 (22)                    |
| Outcome                                                   | 37 (100)                                | Death                                                 | 16 (43)                   |
|                                                           |                                         | Treatment failure                                     | 6 (16)                    |
|                                                           |                                         | Default, Loss to follow-up, or treatment interruption | 6 (16)                    |
|                                                           |                                         | Unfavorable outcome                                   | 6 (16)                    |
|                                                           |                                         | Treatment success                                     | 2 (6)                     |
|                                                           |                                         | Other <sup>‡</sup>                                    | 1 (3)                     |
| Number - prevalence of outcome*                           | 32 (87)                                 | -                                                     | 94 [38-171]<br>15% [9-26] |
| Events per candidate variable <sup>†</sup>                | 30 (81)                                 | -                                                     | 6 [3-11]                  |
| Events per variable (in final model)                      | 29 (78)                                 | -                                                     | 14 [9-26]                 |
| Predictor types                                           |                                         | Clinical/epidemiologic                                | 34 (92)                   |
|                                                           |                                         | Adherence                                             | 1 (3)                     |
|                                                           |                                         | Biomarker                                             | 2 (5)                     |
| Analysis                                                  | 37 (100)                                | Logistic regression                                   | 29 (78)                   |
|                                                           |                                         | Survival analysis                                     | 3 (8)                     |
|                                                           |                                         | Machine learning                                      | 5 (14)                    |
| Method for considering predictors in multivariable models | 36 (97)                                 | All candidate predictors                              | 12 (32)                   |
|                                                           |                                         | Based on unadjusted association with outcome          | 19 (51)                   |
|                                                           |                                         | Based on clinical relevance                           | 1 (3)                     |
|                                                           |                                         | Other <sup>§</sup>                                    | 4 (14)                    |
| Selection of predictors during modeling                   | 31 (84)                                 | Full model approach                                   | 2 (6)                     |
|                                                           |                                         | Forward selection                                     | 7 (23)                    |
|                                                           |                                         | Backwards elimination                                 | 5 (16)                    |
|                                                           |                                         | Stepwise selection                                    | 8 (26)                    |
|                                                           |                                         | Random Forest                                         | 1 (3)                     |
|                                                           |                                         | Hosmer-Lemeshow model building criteria               | 4 (13)                    |
|                                                           |                                         | Bayesian model averaging                              | 3 (10)                    |
|                                                           | Pairwise selection                      | 1 (3)                                                 |                           |

|                                    |         |                                                      |                   |
|------------------------------------|---------|------------------------------------------------------|-------------------|
| P-value for consideration in model | 17 (46) | 0·01                                                 | 2 (12)            |
|                                    |         | 0·05                                                 | 3 (18)            |
|                                    |         | 0·11                                                 | 1 (6)             |
|                                    |         | 0·2                                                  | 6 (35)            |
|                                    |         | 0·25                                                 | 5 (29)            |
| P-value for retention in MV model  | 20 (54) | 0·05                                                 | 9 (45)            |
|                                    |         | 0·1                                                  | 9 (45)            |
|                                    |         | 0·15                                                 | 1 (5)             |
|                                    |         | 0·2                                                  | 1 (5)             |
| Internal validation                | 19 (51) | Split-sample                                         | 10 (53)           |
|                                    |         | Bootstrap                                            | 5 (26)            |
|                                    |         | Cross-validation                                     | 4 (21)            |
| External validation                | 6 (16)  | Temporal                                             | 1 (17)            |
|                                    |         | Geographic                                           | 1 (4)             |
|                                    |         | Setting                                              | 4 (67)            |
| Calibration                        | 17 (46) | Calibration plot <sup>†</sup>                        | 2 (12)            |
|                                    |         | Calibration slope <sup>†</sup>                       | 1 (6)             |
|                                    |         | Hosmer-Lemeshow goodness of fit p-value <sup>†</sup> | 13 (77)           |
|                                    |         |                                                      | 0·51 [0·20, 0·79] |
|                                    |         | Calibration table <sup>†</sup>                       | 2 (12)            |
|                                    |         | Mean absolute error <sup>†</sup>                     | 1 (6)             |
| Discrimination                     | 30 (81) | C-statistic (AUROC) <sup>†</sup>                     | 30 (100)          |
|                                    |         |                                                      | 0·75 [0·68-0·84]  |
|                                    |         | Log rank test <sup>†</sup>                           | 2 (5)             |
| Classification                     | 18 (49) | Sensitivity <sup>‡</sup>                             | 14 (78)           |
|                                    |         |                                                      | 70 [54, 78]       |
|                                    |         | Specificity <sup>‡</sup>                             | 13 (72)           |
|                                    |         |                                                      | 75 [71, 88]       |
|                                    |         | Accuracy                                             | 2 (11)            |
|                                    |         | Other**                                              | 2 (11)            |
| Model presentation                 | 34 (92) | Risk score                                           | 16 (43)           |
|                                    |         | Model coefficient                                    | 8 (22)            |
|                                    |         | Nomogram                                             | 2 (6)             |
|                                    |         | Odds ratios/relative scores                          | 4 (12)            |
|                                    |         | Survey tool                                          | 1 (3)             |

Abbreviations: AUROC=area under receiver operating characteristic; c-statistic=concordance statistic

\*Prevalence of outcome in the population used to develop the prediction model (i.e. derivation/development subset if split-sample technique was used or full sample if the model was not validated or if bootstrap/cross-validation was used)

†Only 5 studies report the exact number of predictors considered. Otherwise, the number of candidate predictors was estimated from the provided tables or lists of candidate predictors in the source paper.

1  
2  
3 ‡Outcome is a value from 1 to 5 (1= patient completed the treatment course in frame of DOTS,  
4 2=cured, 3= quit treatment, 4=failed treatment and 5=death)

5 §Other methods of determining which variables to consider for prediction model include:  
6 principal components analysis (n=1), screening for multi-collinearity via correlation coefficient  
7 (n=1), one study used a combination of a priori and selection via univariable association, and the  
8 other used machine learning pre-processing (n=1)

9 ¶Sums to more than 100%, because some studies report multiple measures of calibration or  
10 discrimination

11 ||Based on the following cut-off methods: Youden (n=4) concordance probability (n=1),  
12 estimated at nearest 0,1 for studies that present a range of sensitivity and specificity in a table or  
13 figure (n=4), or unknown (n=5)

14 \*\*Other includes one study that reports false positive rate and one study that includes a graph of  
15 sensitivity vs. specificity.  
16  
17  
18  
19  
20  
21  
22  
23  
24  
25  
26  
27  
28  
29  
30  
31  
32  
33  
34  
35  
36  
37  
38  
39  
40  
41  
42  
43  
44  
45  
46  
47  
48  
49  
50  
51  
52  
53  
54  
55  
56  
57  
58  
59  
60

1  
2  
3 **Figure 2.** Most common predictors considered and included  
4

5  
6 [See Figure 2]

7 Figure 2 legend:

8 Considered: the predictor as evaluated as a candidate predictor prior to multivariable modeling

9 Included: the predictor was considered and subsequently included in the final multivariable  
10 model  
11

12  
13 **Figure 3.** Heatmap of signaling questions from risk of bias assessment with PROBAST  
14

15  
16 [See Figure 3]  
17

18 Figure 3 legend:

19 PROBAST questions (additional details in Supplemental File 5)

20 Participants 1: What study design was used and was it appropriate?

21 Participants 2: Were all inclusion and exclusion criteria appropriate?

22 Predictors 1: Were predictors defined as assessed the same way for all participants?

23 Predictors 2: Were predictor assessments made without knowledge of data outcome?

24 Predictors 3: Are all predictors available at the time the model was intended to be used?

25 Outcome 1: Was the outcome determined appropriately?

26 Outcome 2: Was the outcome pre-specified or standard?

27 Outcome 3: Were predictors excluded from outcome definition?

28 Outcome 4: Was the outcome defined and determined in a similar way for all participants?

29 Outcome 5: Was the outcome determined without predictor information?

30 Outcome 6: Was the time interval between predictor assessment and outcome determination  
31 appropriate?  
32

33 Analysis 1: Were there a reasonable number of participants with the outcome?

34 Analysis 2: Were continuous and categorical variables handled appropriately?

35 Analysis 3: Were all enrolled participants included in the analysis?

36 Analysis 4: Were participants with missing data handled appropriately?

37 Analysis 5: Was selection of predictors based on univariable analysis avoided?

38 Analysis 6: Were complexities in data (censoring, competing risks, sampling of control  
39 participants) accounted for appropriately?  
40

41 Analysis 7: Were relevant model performance measures evaluated appropriately?

42 Analysis 8: Were model overfitting, underfitting, and optimism in the model performance  
43 accounted for?  
44

45 Analysis 9: Do predictors and their assigned weights in the final model correspond to the results  
46 from the reported multivariable analysis?  
47  
48  
49  
50  
51  
52  
53  
54  
55  
56  
57  
58  
59  
60

1  
2  
3 **Figure 4.** Summary of risk of bias and applicability assessment with PROBAST  
4

5  
6 **[See Figure 4]**  
7  
8  
9  
10  
11  
12  
13  
14  
15  
16  
17  
18  
19  
20  
21  
22  
23  
24  
25  
26  
27  
28  
29  
30  
31  
32  
33  
34  
35  
36  
37  
38  
39  
40  
41  
42  
43  
44  
45  
46  
47  
48  
49  
50  
51  
52  
53  
54  
55  
56  
57  
58  
59  
60



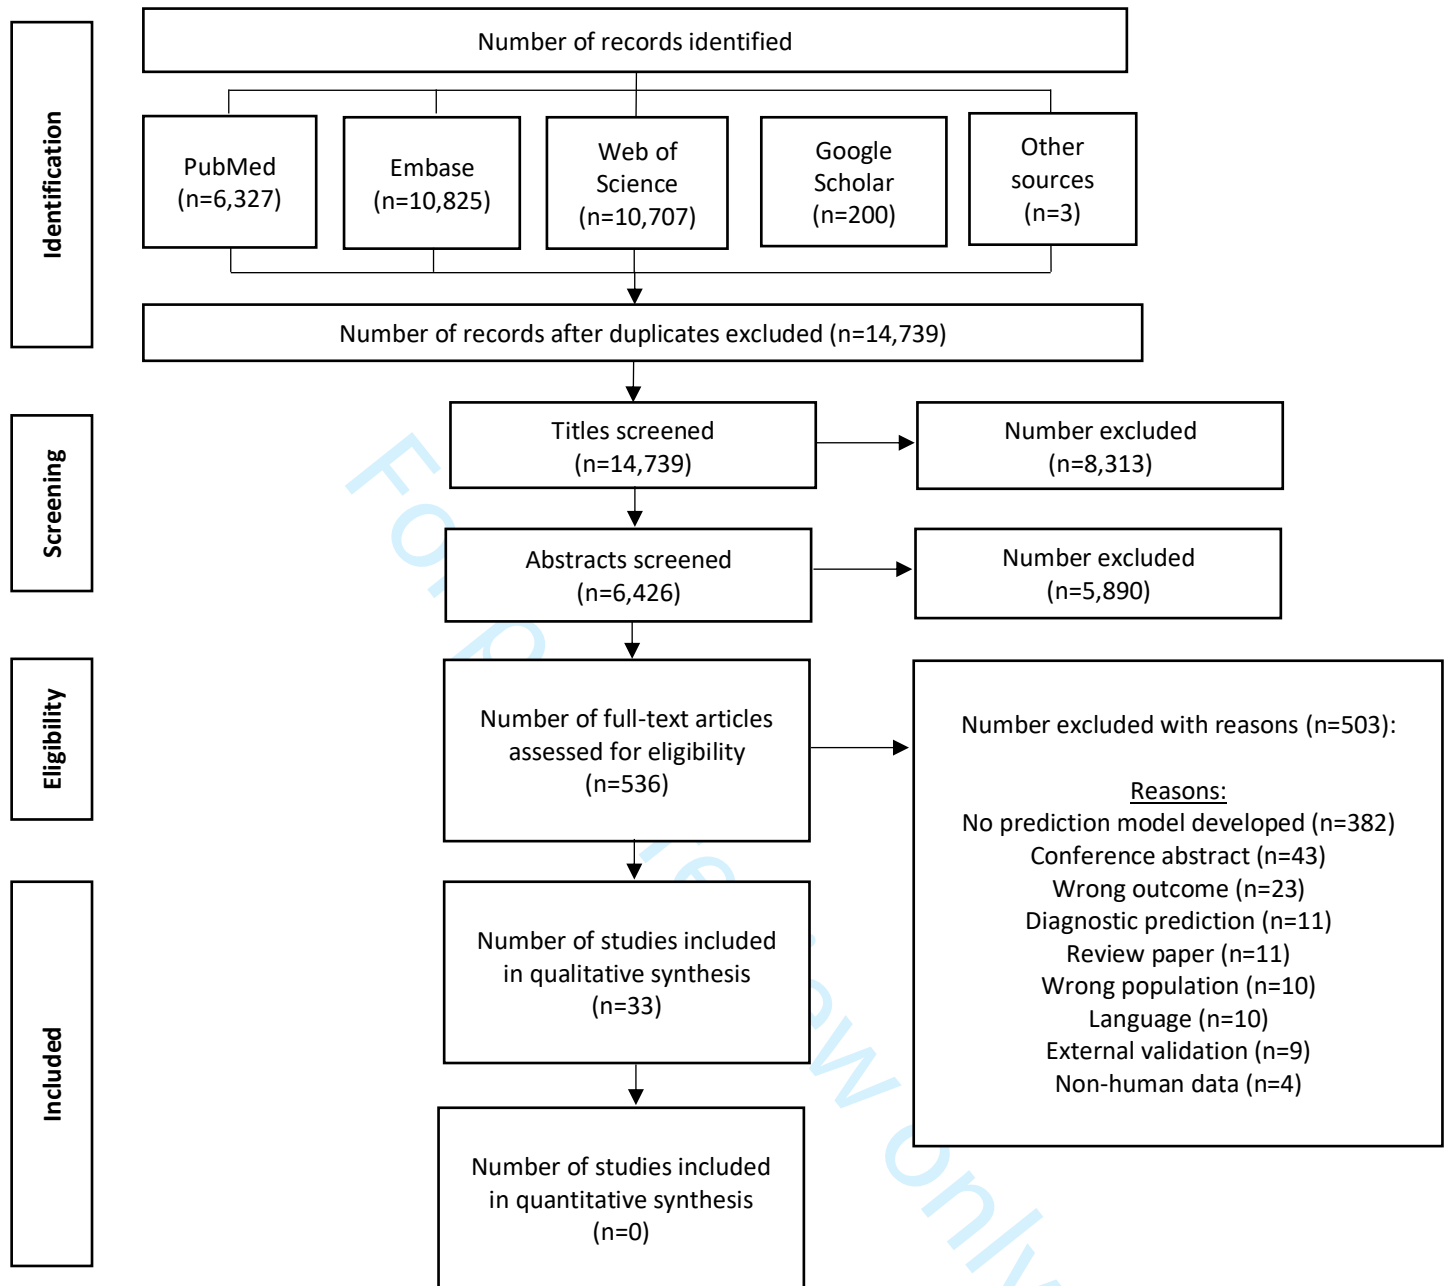



203x203mm (300 x 300 DPI)

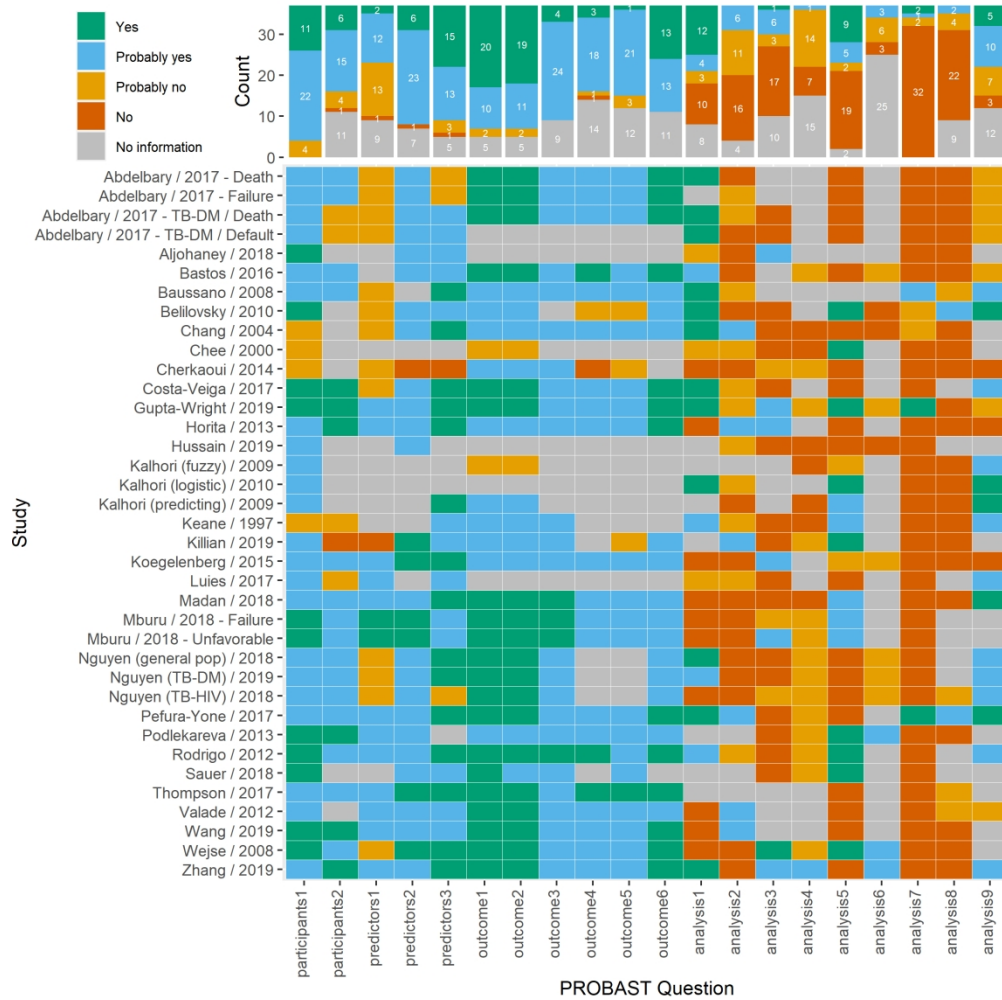

203x203mm (300 x 300 DPI)



203x203mm (300 x 300 DPI)

## Supplemental File 1. PRISMA Checklist

| Section/topic                      | #  | Checklist item                                                                                                                                                                                                                                                                                              | Reported on page #            |
|------------------------------------|----|-------------------------------------------------------------------------------------------------------------------------------------------------------------------------------------------------------------------------------------------------------------------------------------------------------------|-------------------------------|
| <b>TITLE</b>                       |    |                                                                                                                                                                                                                                                                                                             |                               |
| Title                              | 1  | Identify the report as a systematic review, meta-analysis, or both.                                                                                                                                                                                                                                         | 1                             |
| <b>ABSTRACT</b>                    |    |                                                                                                                                                                                                                                                                                                             |                               |
| Structured summary                 | 2  | Provide a structured summary including, as applicable: background; objectives; data sources; study eligibility criteria, participants, and interventions; study appraisal and synthesis methods; results; limitations; conclusions and implications of key findings; systematic review registration number. | 3                             |
| <b>INTRODUCTION</b>                |    |                                                                                                                                                                                                                                                                                                             |                               |
| Rationale                          | 3  | Describe the rationale for the review in the context of what is already known.                                                                                                                                                                                                                              | 5-6                           |
| Objectives                         | 4  | Provide an explicit statement of questions being addressed with reference to participants, interventions, comparisons, outcomes, and study design (PICOS).                                                                                                                                                  | Supplemental File 2           |
| <b>METHODS</b>                     |    |                                                                                                                                                                                                                                                                                                             |                               |
| Protocol and registration          | 5  | Indicate if a review protocol exists, if and where it can be accessed (e.g., Web address), and, if available, provide registration information including registration number.                                                                                                                               | Abstract and p. 7             |
| Eligibility criteria               | 6  | Specify study characteristics (e.g., PICOS, length of follow-up) and report characteristics (e.g., years considered, language, publication status) used as criteria for eligibility, giving rationale.                                                                                                      | 7-8                           |
| Information sources                | 7  | Describe all information sources (e.g., databases with dates of coverage, contact with study authors to identify additional studies) in the search and date last searched.                                                                                                                                  | 8                             |
| Search                             | 8  | Present full electronic search strategy for at least one database, including any limits used, such that it could be repeated.                                                                                                                                                                               | Supplemental file 3           |
| Study selection                    | 9  | State the process for selecting studies (i.e., screening, eligibility, included in systematic review, and, if applicable, included in the meta-analysis).                                                                                                                                                   | 8-9                           |
| Data collection process            | 10 | Describe method of data extraction from reports (e.g., piloted forms, independently, in duplicate) and any processes for obtaining and confirming data from investigators.                                                                                                                                  | 8-9                           |
| Data items                         | 11 | List and define all variables for which data were sought (e.g., PICOS, funding sources) and any assumptions and simplifications made.                                                                                                                                                                       | 9; Supplemental Files 4 and 5 |
| Risk of bias in individual studies | 12 | Describe methods used for assessing risk of bias of individual studies (including specification of whether this was done at the study or outcome level), and how this information is to be used in any data synthesis.                                                                                      | 9; Supplemental File 5        |
| Summary measures                   | 13 | State the principal summary measures (e.g., risk ratio, difference in means).                                                                                                                                                                                                                               | N/A                           |
| Synthesis of results               | 14 | Describe the methods of handling data and combining results of studies, if done, including measures of consistency (e.g., $I^2$ ) for each meta-analysis.                                                                                                                                                   | 8-9                           |
| Risk of bias across studies        | 15 | Specify any assessment of risk of bias that may affect the cumulative evidence (e.g., publication bias, selective reporting within studies).                                                                                                                                                                | N/A                           |
| Additional analyses                | 16 | Describe methods of additional analyses (e.g., sensitivity or subgroup analyses, meta-regression), if done, indicating which were pre-specified.                                                                                                                                                            | N/A                           |
| <b>RESULTS</b>                     |    |                                                                                                                                                                                                                                                                                                             |                               |
| Study selection                    | 17 | Give numbers of studies screened, assessed for eligibility, and included in the review, with reasons for exclusions at each stage, ideally with a flow diagram.                                                                                                                                             | 11; Figure 1                  |
| Study characteristics              | 18 | For each study, present characteristics for which data were extracted (e.g., study size, PICOS, follow-up period) and provide the citations.                                                                                                                                                                | 11-13; Table 3, 4, 5          |
| Risk of bias within studies        | 19 | Present data on risk of bias of each study and, if available, any outcome level assessment (see item 12).                                                                                                                                                                                                   | 13-14; Figures 3 and 4        |

|                               |    |                                                                                                                                                                                                          |                |
|-------------------------------|----|----------------------------------------------------------------------------------------------------------------------------------------------------------------------------------------------------------|----------------|
| Results of individual studies | 20 | For all outcomes considered (benefits or harms), present, for each study: (a) simple summary data for each intervention group (b) effect estimates and confidence intervals, ideally with a forest plot. | 11-14; Table 2 |
| Synthesis of results          | 21 | Present results of each meta-analysis done, including confidence intervals and measures of consistency.                                                                                                  | N/A            |
| Risk of bias across studies   | 22 | Present results of any assessment of risk of bias across studies (see Item 15).                                                                                                                          | N/A            |
| Additional analysis           | 23 | Give results of additional analyses, if done (e.g., sensitivity or subgroup analyses, meta-regression [see Item 16]).                                                                                    | N/A            |
| <b>DISCUSSION</b>             |    |                                                                                                                                                                                                          |                |
| Summary of evidence           | 24 | Summarize the main findings including the strength of evidence for each main outcome; consider their relevance to key groups (e.g., healthcare providers, users, and policy makers).                     | 15-19          |
| Limitations                   | 25 | Discuss limitations at study and outcome level (e.g., risk of bias), and at review-level (e.g., incomplete retrieval of identified research, reporting bias).                                            | 18             |
| Conclusions                   | 26 | Provide a general interpretation of the results in the context of other evidence, and implications for future research.                                                                                  | 19             |
| <b>FUNDING</b>                |    |                                                                                                                                                                                                          |                |
| Funding                       | 27 | Describe sources of funding for the systematic review and other support (e.g., supply of data); role of funders for the systematic review.                                                               | 20             |

From: Moher D, Liberati A, Tetzlaff J, Altman DG, The PRISMA Group (2009). Preferred Reporting Items for Systematic Reviews and Meta-Analyses: The PRISMA Statement. PLoS Med 6(7): e1000097. doi:10.1371/journal.pmed1000097

**Supplemental File 2. PICOTS System**

|              |                                                                                                                                                                                                                                                                                                                                                                                                                                                                                                                                                                                                                                                                                      |
|--------------|--------------------------------------------------------------------------------------------------------------------------------------------------------------------------------------------------------------------------------------------------------------------------------------------------------------------------------------------------------------------------------------------------------------------------------------------------------------------------------------------------------------------------------------------------------------------------------------------------------------------------------------------------------------------------------------|
| Population   | Pulmonary tuberculosis cases                                                                                                                                                                                                                                                                                                                                                                                                                                                                                                                                                                                                                                                         |
| Intervention | Any prognostic model developed to predict tuberculosis treatment outcome. This includes model development studies with and without external validation                                                                                                                                                                                                                                                                                                                                                                                                                                                                                                                               |
| Comparator   | Models will be compared to each other, as there is no other relevant comparator for this systematic review                                                                                                                                                                                                                                                                                                                                                                                                                                                                                                                                                                           |
| Outcome      | TB treatment outcome. The primary outcome of interest is the probability of unsuccessful TB treatment outcome, defined by the WHO as the combination of death, treatment failure, default, and/or not evaluated, as compared to successful TB treatment outcome, defined as the combination of cure and treatment completion. Included studies should evaluate at least one of the following outcomes: cure, treatment completion, death, treatment failure, default, and not evaluated. Default and not evaluated are sometimes referred to collectively as lost to follow-up. Some prediction models will look at only single endpoints, whereas other look at composite outcomes. |
| Timing       | The timespan of prediction may vary between studies, depending on the duration of treatment and follow-up, but we expect most studies will evaluate endpoints around 6-9 months.                                                                                                                                                                                                                                                                                                                                                                                                                                                                                                     |
| Setting      | Model designed for use in clinical or hospital setting at the time of TB treatment initiation to aid in targeted treatment or programmatic support for individuals at greatest risk for unsuccessful TB treatment outcomes.                                                                                                                                                                                                                                                                                                                                                                                                                                                          |

## Supplemental File 3. Search Strategy

| Database              | Search terms                                                                                                                                                                                                                                                                                                                                                                                                                                                                                                                                                                                                                                                                                                                                                                                                                                                                                                                                                                                                                                                                                                                                                                                                                                                                                                                                                                                                                                                             |
|-----------------------|--------------------------------------------------------------------------------------------------------------------------------------------------------------------------------------------------------------------------------------------------------------------------------------------------------------------------------------------------------------------------------------------------------------------------------------------------------------------------------------------------------------------------------------------------------------------------------------------------------------------------------------------------------------------------------------------------------------------------------------------------------------------------------------------------------------------------------------------------------------------------------------------------------------------------------------------------------------------------------------------------------------------------------------------------------------------------------------------------------------------------------------------------------------------------------------------------------------------------------------------------------------------------------------------------------------------------------------------------------------------------------------------------------------------------------------------------------------------------|
| <b>PubMed</b>         | <ol style="list-style-type: none"> <li>1. ((validat*[tiab] OR predict*[ti] OR rule*[tiab])<br/>OR (predict*[tiab] AND (outcome*[tiab] OR risk*[tiab] OR model*[tiab]))<br/>OR ((history[tiab] OR variable*[tiab] OR criteria[tiab] OR scor*[tiab] OR characteristic*[tiab] OR finding*[tiab] OR factor*[tiab]) AND<br/>(predict*[tiab] OR model*[tiab] OR decision*[tiab] OR identif*[tiab] OR prognos*[tiab]))<br/>OR (decision*[tiab] AND (model*[tiab] OR clinical*[tiab] OR "Logistic Models"[Mesh]))<br/>OR (prognostic[tiab] AND (history[tiab] OR variable*[tiab] OR criteria[tiab] OR scor*[tiab] OR characteristic*[tiab] OR finding*[tiab] OR<br/>factor*[tiab] OR model*[tiab]))</li> <li>2. (stratification[tiab] OR "ROC Curve"[Mesh] OR discrimination[tiab] OR discriminate[tiab] OR "c-statistic"[tiab] OR "c statistic"[tiab] OR<br/>"area under the curve"[tiab] OR AUC[tiab] OR calibration[tiab] OR indices[tiab] OR algorithm[tiab] OR multivariable[tiab])</li> <li>3. (tuberculosis[Mesh] OR tuberculosis[tiab])</li> <li>4. (outcome*[tiab] OR mortality*[tiab] OR death*[tiab] OR fail*[tiab] OR recur*[tiab] OR relapse*[tiab] OR default*[tiab] OR<br/>abandon*[tiab] OR loss*[tiab] OR cure*[tiab] OR success*[tiab] OR unsuccess*[tiab] OR die[tiab] OR died[tiab] OR dies[tiab]))</li> <li>5. 1 OR 2</li> <li>6. 3 AND 4</li> <li>7. 5 AND 6 AND (humans[Filter]) AND ("1995"[Date - Publication] : "3000"[Date - Publication])</li> </ol> |
| <b>Embase</b>         | <ol style="list-style-type: none"> <li>1. (validat\$ or predict\$ or rule\$).ti.<br/>OR (predict\$ and (outcome\$ or risk\$ or model\$)).ti.ab.<br/>OR ((history or variable\$ or criteria or scor\$ or characteristic\$ or finding\$ or factor\$) and (predict\$ or model\$ or decision\$ or identif\$ or<br/>prognos\$)).ti.ab.<br/>OR (decision\$.ti.ab. and ((model\$ or clinical\$).ti.ab. or "statistical model"/))<br/>OR (prognostic and (history or variable\$ or criteria or scor\$ or characteristic\$ or finding\$ or factor\$ or model\$)).ti.ab.</li> <li>2. (stratification or discrimination or discriminate or c-statistic or "c statistic" or "area under the curve" or AUC or calibration or indices or<br/>algorithm or multivariable).ti.ab. or "receiver operating characteristic"/</li> <li>3. tuberculosis/ or tuberculosis.ti.ab</li> <li>4. (outcome\$ or mortality\$ or death\$ or fail\$ or recur\$ or relapse\$ or default\$ or abandon\$ or loss\$ or cure\$ or success\$ or unsuccess\$ or die<br/>or died or dies).ti.ab.</li> <li>5. 1 or 2</li> <li>6. 3 and 4</li> <li>7. 5 and 6</li> <li>8. limit 7 to (human and yr="1995 -Current")</li> </ol>                                                                                                                                                                                                                                                                                    |
| <b>Web of Science</b> | <ol style="list-style-type: none"> <li>1. TI=(validat* or predict* or rule*)<br/>OR TS=(predict* and (outcome* or risk* or model*))<br/>OR TS=((history or variable* or criteria or scor* or characteristic* or finding* or factor*) and (predict* or model* or decision* or identif* or<br/>prognos*))<br/>OR TS=(decision* and ((model* or clinical*). or "statistical model"))<br/>OR TS=(prognostic and (history or variable* or criteria or scor* or characteristic* or finding* or factor* or model*))</li> <li>2. TS=(stratification or discrimination or discriminate or c-statistic or "c statistic" or "area under the curve" or AUC or calibration or indices or<br/>algorithm or multivariable or "receiver operating characteristic")</li> <li>3. TS=(tuberculosis)</li> <li>4. TS=(outcome* or mortality* or death* or fail* or recur* or relapse* or default* or abandon* or loss* or cure* or success* or unsuccess* or<br/>die or died or dies)</li> <li>5. 1 or 2</li> <li>6. 3 and 4</li> <li>7. 5 and 6; IC Timespan=1995-2019</li> </ol>                                                                                                                                                                                                                                                                                                                                                                                                            |
| <b>Google scholar</b> | tuberculosis treatment outcome prediction prognostic model development validation                                                                                                                                                                                                                                                                                                                                                                                                                                                                                                                                                                                                                                                                                                                                                                                                                                                                                                                                                                                                                                                                                                                                                                                                                                                                                                                                                                                        |



## Supplemental File 4. CHARMS Checklist

| Domain                                       | Key items                                                                                                                                                                                                                                                         | Reported on page # |
|----------------------------------------------|-------------------------------------------------------------------------------------------------------------------------------------------------------------------------------------------------------------------------------------------------------------------|--------------------|
| <b>SOURCE OF DATA</b>                        | Source of data (e.g., cohort, case-control, randomized trial participants, or registry data)                                                                                                                                                                      |                    |
| <b>PARTICIPANTS</b>                          | Participant eligibility and recruitment method (e.g., consecutive participants, location, number of centers, setting, inclusion and exclusion criteria)                                                                                                           |                    |
|                                              | Participant description                                                                                                                                                                                                                                           |                    |
|                                              | Details of treatments received, if relevant                                                                                                                                                                                                                       |                    |
|                                              | Study dates                                                                                                                                                                                                                                                       |                    |
| <b>OUTCOME(S) TO BE PREDICTED</b>            | Definition and method for measurement of outcome                                                                                                                                                                                                                  |                    |
|                                              | Was the same outcome definition (and method for measurement) used in all patients?                                                                                                                                                                                |                    |
|                                              | Type of outcome (e.g., single or combined endpoints)                                                                                                                                                                                                              |                    |
|                                              | Was the outcome assessed without knowledge of the candidate predictors (i.e., blinded)?                                                                                                                                                                           |                    |
|                                              | Were candidate predictors part of the outcome (e.g., in panel or consensus diagnosis)?                                                                                                                                                                            |                    |
|                                              | Time of outcome occurrence or summary of duration of follow-up                                                                                                                                                                                                    |                    |
| <b>CANDIDATE PREDICTORS (OR INDEX TESTS)</b> | Number and type of predictors (e.g., demographics, patient history, physical examination, additional testing, disease characteristics)                                                                                                                            |                    |
|                                              | Definition and method for measurement of candidate predictors                                                                                                                                                                                                     |                    |
|                                              | Timing of predictor measurement (e.g., at patient presentation, at diagnosis, at treatment initiation)                                                                                                                                                            |                    |
|                                              | Were predictors assessed blinded for outcome, and for each other (if relevant)?                                                                                                                                                                                   |                    |
| <b>SAMPLE SIZE</b>                           | Number of participants and number of outcomes/events                                                                                                                                                                                                              |                    |
|                                              | Number of outcomes/events in relation to the number of candidate predictors (Events Per Variable)                                                                                                                                                                 |                    |
| <b>MISSING DATA</b>                          | Number of participants with any missing value (include predictors and outcomes)                                                                                                                                                                                   |                    |
|                                              | Number of participants with missing data for each predictor                                                                                                                                                                                                       |                    |
|                                              | Handling of missing data (e.g., complete-case analysis, imputation, or other methods)                                                                                                                                                                             |                    |
| <b>MODEL DEVELOPMENT</b>                     | Modelling method (e.g., logistic, survival, neural network, or machine learning techniques)                                                                                                                                                                       |                    |
|                                              | Modelling assumptions satisfied                                                                                                                                                                                                                                   |                    |
|                                              | Method for selection of predictors <b>for inclusion</b> in multivariable modelling (e.g., all candidate predictors, pre-selection based on unadjusted association with the outcome)                                                                               |                    |
|                                              | Method for selection of predictors <b>during multivariable modelling</b> (e.g., full model approach, backward or forward selection) and criteria used (e.g., p-value, Akaike Information Criterion)                                                               |                    |
|                                              | Shrinkage of predictor weights or regression coefficients (e.g., no shrinkage, uniform shrinkage, penalized estimation)                                                                                                                                           |                    |
| <b>MODEL PERFORMANCE</b>                     | Calibration (calibration plot, calibration slope, Hosmer-Lemeshow test) and Discrimination (C-statistic, D-statistic, log-rank) measures with confidence intervals                                                                                                |                    |
|                                              | Classification measures (e.g., sensitivity, specificity, predictive values, net reclassification improvement) and whether a-priori cut points were used                                                                                                           |                    |
| <b>MODEL EVALUATION</b>                      | Method used for testing model performance: development dataset only (random split of data, resampling methods e.g. bootstrap or cross-validation, none) or separate external validation (e.g. temporal, geographical, different setting, different investigators) |                    |
|                                              | In case of poor validation, whether model was adjusted or updated (e.g., intercept recalibrated, predictor effects adjusted, or new predictors added)                                                                                                             |                    |
| <b>RESULTS</b>                               | Final and other multivariable models (e.g., basic, extended, simplified) presented, including predictor weights or regression coefficients, intercept, baseline survival, model performance measures (with standard errors or confidence intervals)               |                    |
|                                              | Any alternative presentation of the final prediction models, e.g., sum score, nomogram, score chart, predictions for specific risk subgroups with performance                                                                                                     |                    |

|    |                                          |                                                                                                                                      |  |
|----|------------------------------------------|--------------------------------------------------------------------------------------------------------------------------------------|--|
| 1  |                                          | Comparison of the distribution of predictors (including missing data) for development and validation datasets                        |  |
| 2  |                                          |                                                                                                                                      |  |
| 3  | <b>INTERPRETATION<br/>AND DISCUSSION</b> | Interpretation of presented models (confirmatory, i.e., model useful for practice versus exploratory, i.e., more research<br>needed) |  |
| 4  |                                          |                                                                                                                                      |  |
| 5  |                                          | Comparison with other studies, discussion of generalizability, strengths and limitations.                                            |  |
| 6  |                                          |                                                                                                                                      |  |
| 7  |                                          |                                                                                                                                      |  |
| 8  |                                          |                                                                                                                                      |  |
| 9  |                                          |                                                                                                                                      |  |
| 10 |                                          |                                                                                                                                      |  |
| 11 |                                          |                                                                                                                                      |  |
| 12 |                                          |                                                                                                                                      |  |
| 13 |                                          |                                                                                                                                      |  |
| 14 |                                          |                                                                                                                                      |  |
| 15 |                                          |                                                                                                                                      |  |
| 16 |                                          |                                                                                                                                      |  |
| 17 |                                          |                                                                                                                                      |  |
| 18 |                                          |                                                                                                                                      |  |
| 19 |                                          |                                                                                                                                      |  |
| 20 |                                          |                                                                                                                                      |  |
| 21 |                                          |                                                                                                                                      |  |
| 22 |                                          |                                                                                                                                      |  |
| 23 |                                          |                                                                                                                                      |  |
| 24 |                                          |                                                                                                                                      |  |
| 25 |                                          |                                                                                                                                      |  |
| 26 |                                          |                                                                                                                                      |  |
| 27 |                                          |                                                                                                                                      |  |
| 28 |                                          |                                                                                                                                      |  |
| 29 |                                          |                                                                                                                                      |  |
| 30 |                                          |                                                                                                                                      |  |
| 31 |                                          |                                                                                                                                      |  |
| 32 |                                          |                                                                                                                                      |  |
| 33 |                                          |                                                                                                                                      |  |
| 34 |                                          |                                                                                                                                      |  |
| 35 |                                          |                                                                                                                                      |  |
| 36 |                                          |                                                                                                                                      |  |
| 37 |                                          |                                                                                                                                      |  |
| 38 |                                          |                                                                                                                                      |  |
| 39 |                                          |                                                                                                                                      |  |
| 40 |                                          |                                                                                                                                      |  |
| 41 |                                          |                                                                                                                                      |  |
| 42 |                                          |                                                                                                                                      |  |
| 43 |                                          |                                                                                                                                      |  |
| 44 |                                          |                                                                                                                                      |  |
| 45 |                                          |                                                                                                                                      |  |
| 46 |                                          |                                                                                                                                      |  |
| 47 |                                          |                                                                                                                                      |  |
| 48 |                                          |                                                                                                                                      |  |
| 49 |                                          |                                                                                                                                      |  |
| 50 |                                          |                                                                                                                                      |  |
| 51 |                                          |                                                                                                                                      |  |
| 52 |                                          |                                                                                                                                      |  |
| 53 |                                          |                                                                                                                                      |  |
| 54 |                                          |                                                                                                                                      |  |
| 55 |                                          |                                                                                                                                      |  |
| 56 |                                          |                                                                                                                                      |  |
| 57 |                                          |                                                                                                                                      |  |
| 58 |                                          |                                                                                                                                      |  |
| 59 |                                          |                                                                                                                                      |  |
| 60 |                                          |                                                                                                                                      |  |

For peer review only

## Supplemental File 5. Prediction model Risk Of Bias Assessment Tool (PROBAST)

[Link](#) to full explanation and elaboration document

Citation: Moons KG, Wolff RF, Riley RD, et al. PROBAST: A Tool to Assess Risk of Bias and Applicability of Prediction Model Studies: Explanation and Elaboration. *Ann Intern Med.* 2019;170:W1–W33. doi: <https://doi.org/10.7326/M18-1377>

| <b>Domain 1: Participants</b>                                                                                                                                                                                                                                                                                             |                                                        |                                                                                                                                                                                                                                                                                                                                                                                                         |                                                                                                                                                                                                                                                                                                                                                                                                                                                                                                                                                 |                                                                                                                                                               |
|---------------------------------------------------------------------------------------------------------------------------------------------------------------------------------------------------------------------------------------------------------------------------------------------------------------------------|--------------------------------------------------------|---------------------------------------------------------------------------------------------------------------------------------------------------------------------------------------------------------------------------------------------------------------------------------------------------------------------------------------------------------------------------------------------------------|-------------------------------------------------------------------------------------------------------------------------------------------------------------------------------------------------------------------------------------------------------------------------------------------------------------------------------------------------------------------------------------------------------------------------------------------------------------------------------------------------------------------------------------------------|---------------------------------------------------------------------------------------------------------------------------------------------------------------|
| The overall aim for prediction models is to generate absolute risk predictions that are correct in new individuals. Certain data sources or designs are not suited to generate absolute probabilities. Problems may also arise if a study inappropriately includes or excludes participant groups from entering the study |                                                        |                                                                                                                                                                                                                                                                                                                                                                                                         |                                                                                                                                                                                                                                                                                                                                                                                                                                                                                                                                                 |                                                                                                                                                               |
|                                                                                                                                                                                                                                                                                                                           | <u>Signaling question</u>                              | <u>Yes/probably yes</u>                                                                                                                                                                                                                                                                                                                                                                                 | <u>No/probably no</u>                                                                                                                                                                                                                                                                                                                                                                                                                                                                                                                           | <u>No information</u>                                                                                                                                         |
| 1                                                                                                                                                                                                                                                                                                                         | What study design was used and was it appropriate?     | Yes: If a cohort design (including RCT or proper registry data) was used and you have confidence in data quality and participant enrollment is clearly described<br><br>Probably yes: a nested case-control or case-cohort design (with proper adjustment of the baseline risk/hazard in the analysis) has been used or a cohort design was used but participant enrollment was data quality is unclear | No: If a non-nested case-control design has been used<br><br>Probably no: a nested case-control study was used without proper adjustment of baseline risk/hazard                                                                                                                                                                                                                                                                                                                                                                                | If the method of participant sampling is unclear.                                                                                                             |
| 2                                                                                                                                                                                                                                                                                                                         | Were all inclusion and exclusion criteria appropriate? | Yes: Inclusion and exclusion are clear and selection participants was appropriate, so participants correspond to unselected participants of interest (i.e. the target population).<br><br>Probably yes: Inclusion and exclusion criteria are not entirely clear, but it seems like the population is representative of the target population                                                            | No: If participants are included who would already have been identified as having the outcome and so are no longer at risk of developing outcome, or if specific subgroups are excluded that may have altered the performance of the prediction model for the intended target population.<br><br>Probably no: inclusion and exclusion criteria are unclear and it seems possible that there was bias in selection of participants that could lead to the model being applied to a population that is unrepresentative of the target population. | When there is no information on whether inappropriate inclusions or exclusions took place.                                                                    |
| <b>Low risk of bias</b>                                                                                                                                                                                                                                                                                                   |                                                        | <b>High risk of bias</b>                                                                                                                                                                                                                                                                                                                                                                                |                                                                                                                                                                                                                                                                                                                                                                                                                                                                                                                                                 | <b>Unclear risk of bias</b>                                                                                                                                   |
| If the answer to all signaling questions is “Yes” or “Probably yes,” then risk of bias can be considered low. If $\geq 1$ of the answers is “No” or “Probably no,” the judgment could still be “Low risk of bias” but specific reasons should be provided why the risk of bias can be considered low.                     |                                                        | If the answer to any of the signaling questions is “No” or “Probably no,” there is a potential for bias, except if defined at low risk of bias above.                                                                                                                                                                                                                                                   |                                                                                                                                                                                                                                                                                                                                                                                                                                                                                                                                                 | If relevant information is missing for some of the signaling questions and none of the signaling questions is judged to put this domain at high risk of bias. |

| <b>Domain 2: Predictors</b>                                                                                                                                                                                                                                                                                                           |                                                                             |                                                                                                                                                                                                                                                                                                                                                                          |                                                                                                                                                                                                                                                                                                                                                                                                     |                                                                                              |
|---------------------------------------------------------------------------------------------------------------------------------------------------------------------------------------------------------------------------------------------------------------------------------------------------------------------------------------|-----------------------------------------------------------------------------|--------------------------------------------------------------------------------------------------------------------------------------------------------------------------------------------------------------------------------------------------------------------------------------------------------------------------------------------------------------------------|-----------------------------------------------------------------------------------------------------------------------------------------------------------------------------------------------------------------------------------------------------------------------------------------------------------------------------------------------------------------------------------------------------|----------------------------------------------------------------------------------------------|
| Bias in model performance can occur when the definition and measurement of predictors is flawed. Predictors are the variables evaluated for their association with the outcome of interest. Bias can occur, for example, when predictors are not defined in a similar way for all participants or knowledge of the outcome influences |                                                                             |                                                                                                                                                                                                                                                                                                                                                                          |                                                                                                                                                                                                                                                                                                                                                                                                     |                                                                                              |
|                                                                                                                                                                                                                                                                                                                                       | <u>Signaling question</u>                                                   | <u>Yes/probably yes</u>                                                                                                                                                                                                                                                                                                                                                  | <u>No/probably no</u>                                                                                                                                                                                                                                                                                                                                                                               | <u>No information</u>                                                                        |
| 1                                                                                                                                                                                                                                                                                                                                     | Were predictors defined and assessed in a similar way for all participants? | Yes: It is clear that definitions of predictors and their assessment were similar for all participants.<br><br>Probably yes: Some predictors were based off subjective judgement, but carried out by persons with the necessary skills to evaluate the predictor, or if data from multiple sources was used but predictor definitions were standardized between sources. | No: If different definitions were used for the same predictor or if predictors requiring subjective interpretation were assessed by differently experienced assessors<br><br>Probably no: Data from multiple sources was used and its unclear whether definitions were standardized between sources or if subjective measurements were likely not carried out by persons with appropriate training. | If there is no information on how predictors were defined or assessed.                       |
| 2                                                                                                                                                                                                                                                                                                                                     | Were predictor assessments made without knowledge of data outcome?          | Yes: If outcome information was stated as not used during predictor assessment or was clearly not (yet) available to those assessing predictors (i.e. prospective data collection).                                                                                                                                                                                      | If it is clear that outcome information was used when assessing predictors.                                                                                                                                                                                                                                                                                                                         | No information on whether predictors were assessed without knowledge of outcome information. |

|                                                                                                                                                                                                                                                                                                       |                                                                             |                                                                                                                                                                           |                                                                                                |                                                                                                                                                               |
|-------------------------------------------------------------------------------------------------------------------------------------------------------------------------------------------------------------------------------------------------------------------------------------------------------|-----------------------------------------------------------------------------|---------------------------------------------------------------------------------------------------------------------------------------------------------------------------|------------------------------------------------------------------------------------------------|---------------------------------------------------------------------------------------------------------------------------------------------------------------|
|                                                                                                                                                                                                                                                                                                       |                                                                             | Probably yes: If it is likely that outcome information was not used during predictor assessment, but not entirely clear (retrospective data collection/surveillance data) |                                                                                                |                                                                                                                                                               |
| 3                                                                                                                                                                                                                                                                                                     | Are all predictors available at the time the model was intended to be used? | All included predictors would be available at the time the model is intended to be used for prediction                                                                    | Predictors would not be available at the time the model is intended to be used for prediction. | No information on whether predictors would be available at the time the model is intended to be used for prediction.                                          |
| <b>Low risk of bias</b>                                                                                                                                                                                                                                                                               |                                                                             | <b>High risk of bias</b>                                                                                                                                                  |                                                                                                | <b>Unclear risk of bias</b>                                                                                                                                   |
| If the answer to all signaling questions is “Yes” or “Probably yes,” then risk of bias can be considered low. If $\geq 1$ of the answers is “No” or “Probably no,” the judgment could still be “Low risk of bias” but specific reasons should be provided why the risk of bias can be considered low. |                                                                             | If the answer to any of the signaling questions is “No” or “Probably no,” there is a potential for bias, except if defined at low risk of bias above.                     |                                                                                                | If relevant information is missing for some of the signaling questions and none of the signaling questions is judged to put this domain at high risk of bias. |

| <b>Domain 3: Outcome</b>                                                                                                                                                                                                                                                                                                                                                                                                                                                                                                     |                                                                               |                                                                                                                                                                                                                                                                                                                                                                                                                                                                                   |                                                                                                                                                                                                                                                                                                                                                            |                                                                                                     |
|------------------------------------------------------------------------------------------------------------------------------------------------------------------------------------------------------------------------------------------------------------------------------------------------------------------------------------------------------------------------------------------------------------------------------------------------------------------------------------------------------------------------------|-------------------------------------------------------------------------------|-----------------------------------------------------------------------------------------------------------------------------------------------------------------------------------------------------------------------------------------------------------------------------------------------------------------------------------------------------------------------------------------------------------------------------------------------------------------------------------|------------------------------------------------------------------------------------------------------------------------------------------------------------------------------------------------------------------------------------------------------------------------------------------------------------------------------------------------------------|-----------------------------------------------------------------------------------------------------|
| Bias in model performance can occur when methods used to determine outcomes incorrectly classify participants with or without the outcome. Bias in methods of outcome determination can result from use of suboptimal methods, tests, or criteria that lead to unacceptably high levels of errors in outcome determination, when methods are inconsistently applied across participants, or when knowledge of predictors influence outcome determination. Incorrect timing of outcome determination can also result in bias. |                                                                               |                                                                                                                                                                                                                                                                                                                                                                                                                                                                                   |                                                                                                                                                                                                                                                                                                                                                            |                                                                                                     |
|                                                                                                                                                                                                                                                                                                                                                                                                                                                                                                                              | <b>Signaling question</b>                                                     | <b>Yes/probably yes</b>                                                                                                                                                                                                                                                                                                                                                                                                                                                           | <b>No/probably no</b>                                                                                                                                                                                                                                                                                                                                      | <b>No information</b>                                                                               |
| 1                                                                                                                                                                                                                                                                                                                                                                                                                                                                                                                            | Was the outcome determined appropriately?                                     | If a method of outcome determination has been used which is considered optimal or acceptable by guidelines or previous publications on the topic<br>Note: This is about level of measurement error within the method of determining the outcome (see concerns for applicability about whether the definition of the outcome method is appropriate).                                                                                                                               | If a clearly suboptimal method has been used that causes unacceptable error in determining outcome status in participants                                                                                                                                                                                                                                  | No information on how outcome was determined                                                        |
| 2                                                                                                                                                                                                                                                                                                                                                                                                                                                                                                                            | Was the outcome pre-specified or standard?                                    | Yes: If the method of outcome determination is objective, or if a standard outcome definition is used, or if prespecified categories are used to group outcomes. (i.e. outcome assessment is based on previously published studies, published study protocol, or clinical guidelines)<br><br>Probably yes: The outcome determination is not clearly based on guidelines or previous research, but outcome assessment is objective and would not inadvertently alter study results | No: If the outcome definition was not standard and not prespecified<br><br>Probably no: a non-standard or non-prespecified outcome was used, and it is unclear whether the outcome definition could introduce bias.<br><br>*Caution with composite outcomes that favor a better model by excluding typical outcome components or including atypical events | No information on whether the outcome definition was prespecified or standard                       |
| 3                                                                                                                                                                                                                                                                                                                                                                                                                                                                                                                            | Were predictors excluded from outcome definition?                             | Yes: None of the predictors are included in the outcome definition (clearly stated)<br><br>Probably yes: None of the predictors are included in the outcome definition (assumed)                                                                                                                                                                                                                                                                                                  | If $\geq 1$ of the predictors forms part of the outcome definition                                                                                                                                                                                                                                                                                         | No information on whether predictors are excluded from the outcome definition                       |
| 4                                                                                                                                                                                                                                                                                                                                                                                                                                                                                                                            | Was the outcome defined and determined in a similar way for all participants? | Yes: If outcomes were defined and determined in a similar way for all participants (clearly stated)<br><br>Probably yes: If outcomes were defined and determined in a similar way for all participants (assumed)                                                                                                                                                                                                                                                                  | If outcomes were clearly defined and determined in a different way for some participants                                                                                                                                                                                                                                                                   | No information on whether outcomes were defined or determined in a similar way for all participants |
| 5                                                                                                                                                                                                                                                                                                                                                                                                                                                                                                                            | Was the outcome determined without predictor information                      | Yes: If predictor information was not known when determining the outcome status, or outcome status determination is clearly reported as determined without knowledge of predictor information.<br><br>Probably yes: predictor information might have been available at time of outcome assessment, but outcome definition is objective and knowing information about predictors would not influence outcome                                                                       | No: If it is clear that predictor information was used when determining the outcome status<br><br>Probably no: it is likely predictor information was available at the time of outcome assessment, and outcome definition is subjective and knowledge of predictors could influence outcome determination.                                                 | No information on whether outcome was determined without knowledge of predictor information         |

|   |                                                                                          |                                                                                                                                                                                                                                                                                                                                                                                                                                  |                                                                                                                                                                                                |                                                                                                                                                               |
|---|------------------------------------------------------------------------------------------|----------------------------------------------------------------------------------------------------------------------------------------------------------------------------------------------------------------------------------------------------------------------------------------------------------------------------------------------------------------------------------------------------------------------------------|------------------------------------------------------------------------------------------------------------------------------------------------------------------------------------------------|---------------------------------------------------------------------------------------------------------------------------------------------------------------|
|   |                                                                                          | assessment (i.e. death, treatment failure based on culture results, etc)                                                                                                                                                                                                                                                                                                                                                         |                                                                                                                                                                                                |                                                                                                                                                               |
| 6 | Was the time interval between predictor assessment and outcome determination appropriate | If the time interval between predictor assessment and outcome determination was appropriate to enable the correct type and representative number of relevant outcomes to be recorded, or if no information on the time interval is required to allow a representative number of the relevant outcome occur or if predictor assessment and outcome determination were from information taken within an appropriate time interval. | If the time interval between predictor assessment and outcome determination is too short or too long to enable the correct type and representative number of relevant outcomes to be recorded. | If no information was provided on the time interval between predictor assessment and outcome determination.                                                   |
|   |                                                                                          | <b>Low risk of bias</b>                                                                                                                                                                                                                                                                                                                                                                                                          | <b>High risk of bias</b>                                                                                                                                                                       | <b>Unclear risk of bias</b>                                                                                                                                   |
|   |                                                                                          | If the answer to all signaling questions is “Yes” or “Probably yes,” then risk of bias can be considered low. If $\geq 1$ of the answers is “No” or “Probably no,” the judgment could still be “Low risk of bias” but specific reasons should be provided why the risk of bias can be considered low.                                                                                                                            | If the answer to any of the signaling questions is “No” or “Probably no,” there is a potential for bias, except if defined at low risk of bias above.                                          | If relevant information is missing for some of the signaling questions and none of the signaling questions is judged to put this domain at high risk of bias. |

| <b>Domain 4: Analysis</b>                                                                                                                                                                                                                                                                                                                                                    |                                                                   |                                                                                                                                                                                                                                                                                                                                                                                                                                                                                                                                                                                                                                                                                                       |                                                                                                                                                                                                                                                                                                                                                                                                                                                                                                                                                                              |                                                                                                                                                                                                                                                                                                                                    |
|------------------------------------------------------------------------------------------------------------------------------------------------------------------------------------------------------------------------------------------------------------------------------------------------------------------------------------------------------------------------------|-------------------------------------------------------------------|-------------------------------------------------------------------------------------------------------------------------------------------------------------------------------------------------------------------------------------------------------------------------------------------------------------------------------------------------------------------------------------------------------------------------------------------------------------------------------------------------------------------------------------------------------------------------------------------------------------------------------------------------------------------------------------------------------|------------------------------------------------------------------------------------------------------------------------------------------------------------------------------------------------------------------------------------------------------------------------------------------------------------------------------------------------------------------------------------------------------------------------------------------------------------------------------------------------------------------------------------------------------------------------------|------------------------------------------------------------------------------------------------------------------------------------------------------------------------------------------------------------------------------------------------------------------------------------------------------------------------------------|
| Statistical analysis is a critical part of prediction model development and validation. The use of inappropriate statistical analysis methods increases the potential for bias in reported model performance measures. Model development studies include many steps where flawed methods can distort results. We recommend reviewers seek statistical advice when completing |                                                                   |                                                                                                                                                                                                                                                                                                                                                                                                                                                                                                                                                                                                                                                                                                       |                                                                                                                                                                                                                                                                                                                                                                                                                                                                                                                                                                              |                                                                                                                                                                                                                                                                                                                                    |
|                                                                                                                                                                                                                                                                                                                                                                              | <b>Signaling question</b>                                         | <b>Yes/probably yes</b>                                                                                                                                                                                                                                                                                                                                                                                                                                                                                                                                                                                                                                                                               | <b>No/probably no</b>                                                                                                                                                                                                                                                                                                                                                                                                                                                                                                                                                        | <b>No information</b>                                                                                                                                                                                                                                                                                                              |
| 1                                                                                                                                                                                                                                                                                                                                                                            | Were there a reasonable number of participants with the outcome?  | For model development studies, if the number of participants with the outcome relative to the number of candidate predictor parameters is $\geq 20$ (EPV $\geq 20$ ).*<br><br>For model validation studies, if the number of participants with the outcome is $\geq 100$ .                                                                                                                                                                                                                                                                                                                                                                                                                            | For model development studies, if the number of participants with the outcome relative to the number of candidate predictor parameters is $< 10$ (EPV $< 10$ ).*<br><br>For model validation studies, if the number of participants with the outcome is $< 100$ .                                                                                                                                                                                                                                                                                                            | For model development studies, no information on the number of candidate predictor parameters or number of participants with the outcome, such that the EPV cannot be calculated.<br><br>For model validation studies, no information on the number of participants with the outcome.                                              |
|                                                                                                                                                                                                                                                                                                                                                                              |                                                                   | * For EPVs between 10 and 20, the item should be rated as either probably yes or probably no, depending on the outcome frequency, overall model performance, and distribution of the predictors in the model. For more guidance, see references 145 to 147.                                                                                                                                                                                                                                                                                                                                                                                                                                           |                                                                                                                                                                                                                                                                                                                                                                                                                                                                                                                                                                              |                                                                                                                                                                                                                                                                                                                                    |
| 2                                                                                                                                                                                                                                                                                                                                                                            | Were continuous and categorical predictors handled appropriately? | Yes: If continuous predictors are kept as continuous or if continuous predictors are examined as linear or non-linear using restricted cubic splines or fractional polynomials.<br><br>Probably yes: If continuous predictors are not converted into $> 2$ categories when included in the model (i.e., dichotomized or categorized) using a prespecified method or in a way that avoids sparse data/would not intentionally improve statistical significance.<br><br>For model validation studies, if continuous predictors are included using the same definitions or transformations, and categorical variables are categorized using the same cut points, as compared with the development study. | No: For model development studies, if continuous predictors are converted into 2 categories when included in the model.<br><br>Probably no: If categorical predictor group definitions do not use a prespecified method or continuous variables were split into $> 2$ groups, but the decision of how to split variables is unclear.<br><br>For model validation studies, if continuous predictors are included using different definitions or transformations, or categorical variables are categorized using different cut points, as compared with the development study. | No information on whether continuous predictors are examined for nonlinearity and no information on how categorical predictor groups are defined.<br><br>For model validation studies, no information on whether the same definitions or transformations and the same cut points are used, as compared with the development study. |
| 3                                                                                                                                                                                                                                                                                                                                                                            | Were all enrolled participants included in the analysis?          | If all participants enrolled in the study are included in the data analysis.                                                                                                                                                                                                                                                                                                                                                                                                                                                                                                                                                                                                                          | If some or a subgroup of participants are inappropriately excluded from the analysis (because they were missing data, unknown outcome, outliers)                                                                                                                                                                                                                                                                                                                                                                                                                             | No information on whether all enrolled participants are included in the analysis.                                                                                                                                                                                                                                                  |
| 4                                                                                                                                                                                                                                                                                                                                                                            | Were participants with missing data handled appropriately?        | Yes: If there are no missing values of predictors or outcomes and the study explicitly reports that participants are not excluded on the basis of missing data, or if missing values are handled using multiple imputation.                                                                                                                                                                                                                                                                                                                                                                                                                                                                           | No: If participants with missing data are omitted from the analysis, or if the method of handling missing data is clearly flawed, e.g., missing indicator method or inappropriate use of last value carried forward, or                                                                                                                                                                                                                                                                                                                                                      | If there is insufficient information to determine if the method of handling missing data is appropriate                                                                                                                                                                                                                            |

|   |                                                                                                                                 |                                                                                                                                                                                                                                                                                                                                                                                                                                                                                              |                                                                                                                                                                                                                                                                                                                                                                                                                                                                                        |                                                                                                                                                                                                                                                                                                                                                                     |
|---|---------------------------------------------------------------------------------------------------------------------------------|----------------------------------------------------------------------------------------------------------------------------------------------------------------------------------------------------------------------------------------------------------------------------------------------------------------------------------------------------------------------------------------------------------------------------------------------------------------------------------------------|----------------------------------------------------------------------------------------------------------------------------------------------------------------------------------------------------------------------------------------------------------------------------------------------------------------------------------------------------------------------------------------------------------------------------------------------------------------------------------------|---------------------------------------------------------------------------------------------------------------------------------------------------------------------------------------------------------------------------------------------------------------------------------------------------------------------------------------------------------------------|
|   |                                                                                                                                 | Probably yes: If a small percentage of persons with missing data were excluded and authors provide comparison of included vs. excluded participants or if sensitivity analysis with imputation methods are convincing that bias is low                                                                                                                                                                                                                                                       | if the study had no explicit mention of methods to handle missing data.<br><br>Probably no: If authors provide comparison of included vs. excluded participants or if sensitivity analysis with imputation methods are reported, but the results are not convincing to rule out bias from excluding missing data                                                                                                                                                                       |                                                                                                                                                                                                                                                                                                                                                                     |
| 5 | Was selection of predictors based on univariable analysis avoided?                                                              | If the predictors are not selected on the basis of univariable analysis prior to multivariable modeling.                                                                                                                                                                                                                                                                                                                                                                                     | If the predictors are selected on the basis of univariable analysis prior to multivariable modeling.                                                                                                                                                                                                                                                                                                                                                                                   | If there is no information to indicate that univariable selection is avoided.                                                                                                                                                                                                                                                                                       |
| 6 | Were complexities in the data (censoring, competing risks, sampling of control participants) accounted for appropriately?       | If any complexities in the data are accounted for appropriately, or if it is clear that any potential data complexities have been identified appropriately as unimportant.                                                                                                                                                                                                                                                                                                                   | If complexities in the data that could affect model performance are ignored. For example, case-control studies that do not estimate baseline risk or studies with censoring or competing risks that do not use survival analysis or other appropriate methods.                                                                                                                                                                                                                         | No information is provided on whether complexities in the data are present or accounted for appropriately if present.                                                                                                                                                                                                                                               |
| 7 | Were relevant model performance measures evaluated appropriately?                                                               | Yes: If both calibration (via calibration plot) and discrimination (c-index) are evaluated appropriately (including relevant measures tailored for models predicting survival outcomes).<br><br>Probably yes: if authors present a table of predicted probabilities with confidence intervals and corresponding outcome frequencies across subgroups                                                                                                                                         | If both calibration and discrimination are not evaluated, or if only goodness-of-fit tests (Hosmer-Lemeshow test), are used to evaluate calibration or if for models predicting survival outcomes performance measures accounting for censoring are not used, or if classification measures (like sensitivity, specificity, or predictive values) were presented using predicted probability thresholds derived from the data set at hand, but calibration is not otherwise evaluated. | Either calibration or discrimination are not reported, or no information is provided as to whether appropriate performance measures for survival outcomes are used (e.g., references to relevant literature or specific mention of methods, such as using Kaplan–Meier estimates), or no information on thresholds for estimating classification measures is given. |
| 8 | Were model overfitting, underfitting, and optimism in model performance accounted for?                                          | Yes: If internal validation techniques (bootstrapping and cross-validation) including all model development procedures, were used to account for any optimism in model fitting, and subsequent adjustment of the model performance estimates were applied.<br><br>Probably yes: If internal validation was used and optimism was estimated as very low, and then optimism-corrected performance measures were not appropriately calculated (accounting for all model development procedures) | No: If no internal validation has been performed, or if internal validation consists only of a single random split-sample of participant data.<br><br>Probably no: Internal validation with bootstrapping or cross-validation was conducted but did not include all model development procedures including any variable selection or were not used to correct model performance measures.                                                                                              | No information: No information is provided on whether internal validation techniques, including all model development procedures, have been applied.                                                                                                                                                                                                                |
| 9 | Do predictors and their assigned weights in the final model correspond to the results from the reported multivariable analysis? | If the predictors and regression coefficients in the final model correspond to reported results from multivariable analysis.                                                                                                                                                                                                                                                                                                                                                                 | If the predictors and regression coefficients in the final model do not correspond to reported results from multivariable analysis. (i.e. rounding of model coefficients to create a “risk score” are inappropriately determined).                                                                                                                                                                                                                                                     | If it is unclear whether the regression coefficients in the final model correspond to reported results from multivariable analysis.                                                                                                                                                                                                                                 |
|   |                                                                                                                                 | <b>Low risk of bias</b>                                                                                                                                                                                                                                                                                                                                                                                                                                                                      | <b>High risk of bias</b>                                                                                                                                                                                                                                                                                                                                                                                                                                                               | <b>Unclear risk of bias</b>                                                                                                                                                                                                                                                                                                                                         |
|   |                                                                                                                                 | If the answer to all signaling questions is “Yes” or “Probably yes,” then risk of bias can be considered low. If $\geq 1$ of the answers is “No” or “Probably no,” the judgment could still be “Low risk of bias” but specific reasons should be provided why the risk of bias can be considered low.                                                                                                                                                                                        | If the answer to any of the signaling questions is “No” or “Probably no,” there is a potential for bias, except if defined at low risk of bias above.                                                                                                                                                                                                                                                                                                                                  | If relevant information is missing for some of the signaling questions and none of the signaling questions is judged to put this domain at high risk of bias.                                                                                                                                                                                                       |

|                      |               |                    |                        |
|----------------------|---------------|--------------------|------------------------|
| <b>Applicability</b> |               |                    |                        |
|                      | <b>Domain</b> | <b>Low concern</b> | <b>High concern</b>    |
|                      |               |                    | <b>Unclear concern</b> |

|    |                                                                                                                       |                                                                                                                 |                                                                                                                                      |                                                                                                 |
|----|-----------------------------------------------------------------------------------------------------------------------|-----------------------------------------------------------------------------------------------------------------|--------------------------------------------------------------------------------------------------------------------------------------|-------------------------------------------------------------------------------------------------|
| 1  | <u>Participants</u> : do you have concern that the included participants or setting do not match the review question? | Included participants and clinical setting match the review question.                                           | Included participants and clinical setting were different from the review question.                                                  | If relevant information about the participants and clinical setting are not reported.           |
| 2  |                                                                                                                       |                                                                                                                 |                                                                                                                                      |                                                                                                 |
| 3  | <u>Predictors</u> : does the definition, assessment, or timing of predictors match the review questions?              | Definition, assessment, and timing of predictors match the review question.                                     | Definition, assessment, or timing of predictors were different from the review question                                              | If relevant information about the predictors is not reported.                                   |
| 4  |                                                                                                                       |                                                                                                                 |                                                                                                                                      |                                                                                                 |
| 5  | <u>Outcome</u> : does the definition, timing, or determination of outcome match the review question?                  | Outcome definition, timing, and method of determination defines the outcome as intended by the review question. | Choice of outcome definition, timing, and method of outcome determination defines another outcome as intended by the review question | If relevant information about the outcome, timing, and method of determination is not reported. |
| 6  |                                                                                                                       |                                                                                                                 |                                                                                                                                      |                                                                                                 |
| 7  |                                                                                                                       |                                                                                                                 |                                                                                                                                      |                                                                                                 |
| 8  |                                                                                                                       |                                                                                                                 |                                                                                                                                      |                                                                                                 |
| 9  |                                                                                                                       |                                                                                                                 |                                                                                                                                      |                                                                                                 |
| 10 |                                                                                                                       |                                                                                                                 |                                                                                                                                      |                                                                                                 |
| 11 |                                                                                                                       |                                                                                                                 |                                                                                                                                      |                                                                                                 |
| 12 |                                                                                                                       |                                                                                                                 |                                                                                                                                      |                                                                                                 |
| 13 |                                                                                                                       |                                                                                                                 |                                                                                                                                      |                                                                                                 |
| 14 |                                                                                                                       |                                                                                                                 |                                                                                                                                      |                                                                                                 |
| 15 |                                                                                                                       |                                                                                                                 |                                                                                                                                      |                                                                                                 |
| 16 |                                                                                                                       |                                                                                                                 |                                                                                                                                      |                                                                                                 |
| 17 |                                                                                                                       |                                                                                                                 |                                                                                                                                      |                                                                                                 |
| 18 |                                                                                                                       |                                                                                                                 |                                                                                                                                      |                                                                                                 |
| 19 |                                                                                                                       |                                                                                                                 |                                                                                                                                      |                                                                                                 |
| 20 |                                                                                                                       |                                                                                                                 |                                                                                                                                      |                                                                                                 |
| 21 |                                                                                                                       |                                                                                                                 |                                                                                                                                      |                                                                                                 |
| 22 |                                                                                                                       |                                                                                                                 |                                                                                                                                      |                                                                                                 |
| 23 |                                                                                                                       |                                                                                                                 |                                                                                                                                      |                                                                                                 |
| 24 |                                                                                                                       |                                                                                                                 |                                                                                                                                      |                                                                                                 |
| 25 |                                                                                                                       |                                                                                                                 |                                                                                                                                      |                                                                                                 |
| 26 |                                                                                                                       |                                                                                                                 |                                                                                                                                      |                                                                                                 |
| 27 |                                                                                                                       |                                                                                                                 |                                                                                                                                      |                                                                                                 |
| 28 |                                                                                                                       |                                                                                                                 |                                                                                                                                      |                                                                                                 |
| 29 |                                                                                                                       |                                                                                                                 |                                                                                                                                      |                                                                                                 |
| 30 |                                                                                                                       |                                                                                                                 |                                                                                                                                      |                                                                                                 |
| 31 |                                                                                                                       |                                                                                                                 |                                                                                                                                      |                                                                                                 |
| 32 |                                                                                                                       |                                                                                                                 |                                                                                                                                      |                                                                                                 |
| 33 |                                                                                                                       |                                                                                                                 |                                                                                                                                      |                                                                                                 |
| 34 |                                                                                                                       |                                                                                                                 |                                                                                                                                      |                                                                                                 |
| 35 |                                                                                                                       |                                                                                                                 |                                                                                                                                      |                                                                                                 |
| 36 |                                                                                                                       |                                                                                                                 |                                                                                                                                      |                                                                                                 |
| 37 |                                                                                                                       |                                                                                                                 |                                                                                                                                      |                                                                                                 |
| 38 |                                                                                                                       |                                                                                                                 |                                                                                                                                      |                                                                                                 |
| 39 |                                                                                                                       |                                                                                                                 |                                                                                                                                      |                                                                                                 |
| 40 |                                                                                                                       |                                                                                                                 |                                                                                                                                      |                                                                                                 |
| 41 |                                                                                                                       |                                                                                                                 |                                                                                                                                      |                                                                                                 |
| 42 |                                                                                                                       |                                                                                                                 |                                                                                                                                      |                                                                                                 |
| 43 |                                                                                                                       |                                                                                                                 |                                                                                                                                      |                                                                                                 |
| 44 |                                                                                                                       |                                                                                                                 |                                                                                                                                      |                                                                                                 |
| 45 |                                                                                                                       |                                                                                                                 |                                                                                                                                      |                                                                                                 |
| 46 |                                                                                                                       |                                                                                                                 |                                                                                                                                      |                                                                                                 |
| 47 |                                                                                                                       |                                                                                                                 |                                                                                                                                      |                                                                                                 |
| 48 |                                                                                                                       |                                                                                                                 |                                                                                                                                      |                                                                                                 |
| 49 |                                                                                                                       |                                                                                                                 |                                                                                                                                      |                                                                                                 |
| 50 |                                                                                                                       |                                                                                                                 |                                                                                                                                      |                                                                                                 |
| 51 |                                                                                                                       |                                                                                                                 |                                                                                                                                      |                                                                                                 |
| 52 |                                                                                                                       |                                                                                                                 |                                                                                                                                      |                                                                                                 |
| 53 |                                                                                                                       |                                                                                                                 |                                                                                                                                      |                                                                                                 |
| 54 |                                                                                                                       |                                                                                                                 |                                                                                                                                      |                                                                                                 |
| 55 |                                                                                                                       |                                                                                                                 |                                                                                                                                      |                                                                                                 |
| 56 |                                                                                                                       |                                                                                                                 |                                                                                                                                      |                                                                                                 |
| 57 |                                                                                                                       |                                                                                                                 |                                                                                                                                      |                                                                                                 |
| 58 |                                                                                                                       |                                                                                                                 |                                                                                                                                      |                                                                                                 |
| 59 |                                                                                                                       |                                                                                                                 |                                                                                                                                      |                                                                                                 |
| 60 |                                                                                                                       |                                                                                                                 |                                                                                                                                      |                                                                                                 |

For peer review only



## Supplemental File 6. Model outcome definitions

| Study ID                           | Outcome category                                  | Full outcome definition from the source paper                                                                                                                                                                                                                                                                                                                                                                                                                                                                                                                                                                                                                                                                                                                                    |
|------------------------------------|---------------------------------------------------|----------------------------------------------------------------------------------------------------------------------------------------------------------------------------------------------------------------------------------------------------------------------------------------------------------------------------------------------------------------------------------------------------------------------------------------------------------------------------------------------------------------------------------------------------------------------------------------------------------------------------------------------------------------------------------------------------------------------------------------------------------------------------------|
| Hussain / 2019                     | Treatment completion                              | The target variable TreatmentComplete consists of 64.37% positive (treatment complete) and 35.62% negative (treatment incomplete)                                                                                                                                                                                                                                                                                                                                                                                                                                                                                                                                                                                                                                                |
| Abdelbary / 2017 - Death           | Death                                             | All causes of death (TB or non-TB related) during the course of TB treatment                                                                                                                                                                                                                                                                                                                                                                                                                                                                                                                                                                                                                                                                                                     |
| Abdelbary / 2017 - TB-DM / Death   | Death                                             | Death included all causes of death (TB and non-TB related) during the course of TB treatment                                                                                                                                                                                                                                                                                                                                                                                                                                                                                                                                                                                                                                                                                     |
| Aljohaney / 2018                   | Death                                             | Not defined, but seems to be death during hospitalization.                                                                                                                                                                                                                                                                                                                                                                                                                                                                                                                                                                                                                                                                                                                       |
| Bastos / 2016                      | Death                                             | Deaths that occurred during the first 6 months after diagnosis were classified as TB death                                                                                                                                                                                                                                                                                                                                                                                                                                                                                                                                                                                                                                                                                       |
| Gupta-Wright / 2019                | Death                                             | The outcome was mortality risk at 2 months after admission.                                                                                                                                                                                                                                                                                                                                                                                                                                                                                                                                                                                                                                                                                                                      |
| Horita / 2013                      | Death                                             | 'Discharged alive' was defined as being discharged alive and satisfying the discharge criteria, i.e., when the patient was receiving effective treatment, showed clinical improvement and negative conversion was confirmed. Negative conversion was defined as three or more consecutive sputum samples obtained on different days being smear-negative for acid-fast bacilli or when appropriate sputum sample(s) were culture-negative. 'Died in hospital' was defined as death from any cause.                                                                                                                                                                                                                                                                               |
| Koegelenberg / 2015                | Death                                             | Patients were categorised as either ICU/hospital survivors or non-survivors.                                                                                                                                                                                                                                                                                                                                                                                                                                                                                                                                                                                                                                                                                                     |
| Nguyen (general pop) / 2018        | Death                                             | Documented treatment outcome of 'completed' or 'died'                                                                                                                                                                                                                                                                                                                                                                                                                                                                                                                                                                                                                                                                                                                            |
| Nguyen (TB-DM) / 2019              | Death                                             | TB treatment outcome of either 'completed' or 'died'                                                                                                                                                                                                                                                                                                                                                                                                                                                                                                                                                                                                                                                                                                                             |
| Nguyen (TB-HIV) / 2018             | Death                                             | Given the main purpose of our study is to predict the mortality during TB treatment in HIV-infected patients against the treatment completion, patients who had an outcome coding other than completed or died.                                                                                                                                                                                                                                                                                                                                                                                                                                                                                                                                                                  |
| Pefura-Yone / 2017                 | Death                                             | At treatment completion, patients are ranked into the following mutually exclusive categories 1) cured-patient with negative smear at the last month of treatment and at least one of the preceding months; 2) treatment completed-patient who has completed the treatment and for whom the smear results at the end of the last month are not available; 3) failure-patient with positive smear at the 5th month or later during treatment; 4) death-death from any cause during treatment; 5) defaulter-patient who's treatment has been interrupted for at least two consecutive months; 6) transfer-patient transferred to complete his treatment in another center and who's treatment outcome is unknown Cured and treatment completed are considered successful treatment |
| Podlekareva / 2013                 | Death                                             | Death within 12 months of TB diagnosis                                                                                                                                                                                                                                                                                                                                                                                                                                                                                                                                                                                                                                                                                                                                           |
| Valade / 2012                      | Death                                             | Final outcomes of survival or death were recorded                                                                                                                                                                                                                                                                                                                                                                                                                                                                                                                                                                                                                                                                                                                                |
| Wang / 2019                        | Death                                             | The outcome was estimated with all-cause mortality, with the mortality in 12 months as the primary outcome and the mortality in 3, 6, 9 months as other outcome                                                                                                                                                                                                                                                                                                                                                                                                                                                                                                                                                                                                                  |
| Wejse / 2008                       | Death                                             | Mortality: ability to predict death                                                                                                                                                                                                                                                                                                                                                                                                                                                                                                                                                                                                                                                                                                                                              |
| Zhang / 2019                       | Death                                             | Primary treatment outcome was documented either survival or death when HIV/TB co-infected patients left hospital. Patients who survived when discharged received 12-month follow-up, and the date of last known alive was documented in electronic medical records base on records of last follow-up                                                                                                                                                                                                                                                                                                                                                                                                                                                                             |
| Abdelbary / 2017 - Failure         | Treatment failure                                 | Treatment failure indicated smear-positive persistence at or after 5 months of treatment with first-line anti-TB medications.                                                                                                                                                                                                                                                                                                                                                                                                                                                                                                                                                                                                                                                    |
| Kalhari (logistic) / 2010          | Treatment failure                                 | The dependent variable was failing in treatment course completion.                                                                                                                                                                                                                                                                                                                                                                                                                                                                                                                                                                                                                                                                                                               |
| Keane / 1997                       | Treatment failure                                 | Failing to clear the sputum of acid-fast bacilli with standard treatment and having to start second line therapy                                                                                                                                                                                                                                                                                                                                                                                                                                                                                                                                                                                                                                                                 |
| Luies / 2017                       | Treatment failure                                 | From the original samples, all treatment failure cases were included.                                                                                                                                                                                                                                                                                                                                                                                                                                                                                                                                                                                                                                                                                                            |
| Mburu / 2018 - Failure             | Treatment failure                                 | The secondary analyses only compared 'cures' versus 'failures' at similar time points as is the standard practice when examining chemotherapy efficacy                                                                                                                                                                                                                                                                                                                                                                                                                                                                                                                                                                                                                           |
| Thompson / 2017                    | Treatment failure                                 | Patients' clinical outcomes were classified as 'cured' if they proved and maintained sputum culture negativity by month 6 after treatment initiation (M6), 'failed' if the M6 culture was still positive, and 'un-evaluable' if contamination caused uncertainty in outcome. We note that none of the treatment failures achieved culture negativity at any time point during treatment.                                                                                                                                                                                                                                                                                                                                                                                         |
| Abdelbary / 2017 - TB-DM / Default | Default, Abandon, or LTF (interruption >2 months) | Never defined                                                                                                                                                                                                                                                                                                                                                                                                                                                                                                                                                                                                                                                                                                                                                                    |
| Belilovsky / 2010                  | Default, Abandon, or LTF (interruption >2 months) | We evaluated TI initiated by the patient (significant noncompliance with the doctor's prescribed course of treatment and serious violations of public order in hospitals) resulting in inpatient treatment cancellation.                                                                                                                                                                                                                                                                                                                                                                                                                                                                                                                                                         |
| Chang / 2004                       | Default, Abandon, or LTF                          | Default was defined as failure to collect drugs for 2 months or more after registration                                                                                                                                                                                                                                                                                                                                                                                                                                                                                                                                                                                                                                                                                          |



|    |                                                   |                                                                                                                                                                                                                                                                                                                                                                                                                                                                                                                                                                                                                                                                                                                                                                                                                                      |
|----|---------------------------------------------------|--------------------------------------------------------------------------------------------------------------------------------------------------------------------------------------------------------------------------------------------------------------------------------------------------------------------------------------------------------------------------------------------------------------------------------------------------------------------------------------------------------------------------------------------------------------------------------------------------------------------------------------------------------------------------------------------------------------------------------------------------------------------------------------------------------------------------------------|
|    | (interruption >2 months)                          |                                                                                                                                                                                                                                                                                                                                                                                                                                                                                                                                                                                                                                                                                                                                                                                                                                      |
| 1  |                                                   |                                                                                                                                                                                                                                                                                                                                                                                                                                                                                                                                                                                                                                                                                                                                                                                                                                      |
| 2  | Default, Abandon, or LTF (interruption >2 months) | Defaulter or cases were defined as patients on anti-tuberculosis treatment at the TBCU who failed to turn up for their scheduled appointments despite usual attempts to recall them by phone or mail, as described below, and from whom at least one home visit during the study was recorded                                                                                                                                                                                                                                                                                                                                                                                                                                                                                                                                        |
| 3  | Chee / 2000                                       |                                                                                                                                                                                                                                                                                                                                                                                                                                                                                                                                                                                                                                                                                                                                                                                                                                      |
| 4  | Default, Abandon, or LTF (interruption >2 months) | Treatment default was defined as an interruption in TB treatment for $\geq 2$ consecutive months.                                                                                                                                                                                                                                                                                                                                                                                                                                                                                                                                                                                                                                                                                                                                    |
| 5  | Cherkaoui / 2014                                  |                                                                                                                                                                                                                                                                                                                                                                                                                                                                                                                                                                                                                                                                                                                                                                                                                                      |
| 6  | Default, Abandon, or LTF (interruption >2 months) | Interruption of treatment for any reason for more than 2 months, non-completion of treatment within 9 months when the patient is placed on a 6 month regimen. or drug intake of <80% the prescribed dose.                                                                                                                                                                                                                                                                                                                                                                                                                                                                                                                                                                                                                            |
| 7  | Rodrigo / 2012                                    |                                                                                                                                                                                                                                                                                                                                                                                                                                                                                                                                                                                                                                                                                                                                                                                                                                      |
| 8  | Treatment success (cure + completion)             | For each patient dependent variable was recorded whether or not the patient finished the treatment course and get cured.                                                                                                                                                                                                                                                                                                                                                                                                                                                                                                                                                                                                                                                                                                             |
| 9  | Kalhari (predicting) / 2009                       |                                                                                                                                                                                                                                                                                                                                                                                                                                                                                                                                                                                                                                                                                                                                                                                                                                      |
| 10 | Unfavorable outcome (death + failure)             | The primary outcome was treatment failure, which we defined as failure of therapy or death.                                                                                                                                                                                                                                                                                                                                                                                                                                                                                                                                                                                                                                                                                                                                          |
| 11 | Sauer / 2018                                      |                                                                                                                                                                                                                                                                                                                                                                                                                                                                                                                                                                                                                                                                                                                                                                                                                                      |
| 12 | Unfavorable outcome (death, failure, LTF, NE)     | Treatment interruption or default, treatment failure, transferred out cases and those lost to follow-up were grouped as 'unsuccessful outcomes'                                                                                                                                                                                                                                                                                                                                                                                                                                                                                                                                                                                                                                                                                      |
| 13 | Baussano / 2008                                   |                                                                                                                                                                                                                                                                                                                                                                                                                                                                                                                                                                                                                                                                                                                                                                                                                                      |
| 14 | Unfavorable outcome (death, failure, LTF, NE)     | In line with WHO criteria, SVIG-TB categorized a six possible and mutually exclusive categories for treatment outcomes, grouped in this study into a binary outcome: (i) Successful outcome-if PTB patients were treated before and declared cured, including both negative smear microscopy at the end of treatment at least one previous follow-up test and in case of not providing sputum samples, cure is declared if treatment completed and absent of disease clinical evidences (categories 1 and 2). (ii) Unsuccessful outcome-if treatment of PTB patients resulted in failure (i.e. remaining smear-positive after 5 months of treatment, cat. 3), default (i.e. patients who interrupted their treatment for two consecutive months or more after registration, cat. 4), death (cat. 5) or were transferred-out (cat. 6) |
| 15 | Costa-Veiga / 2017                                |                                                                                                                                                                                                                                                                                                                                                                                                                                                                                                                                                                                                                                                                                                                                                                                                                                      |
| 16 | Unfavorable outcome (death, failure, LTF, NE)     | We label 'Cured' and 'Treatment Complete' to be favorable outcomes and 'Died', 'Treatment failed', and 'Lost to follow-up' to be unfavorable outcomes                                                                                                                                                                                                                                                                                                                                                                                                                                                                                                                                                                                                                                                                                |
| 17 | Killian / 2019                                    |                                                                                                                                                                                                                                                                                                                                                                                                                                                                                                                                                                                                                                                                                                                                                                                                                                      |
| 18 | Unfavorable outcome (death, failure, LTF, NE)     | Favourable treatment outcomes included cure and treatment completed. Unfavourable treatment outcomes included death, loss to follow-up, treatment failure, transfer out, or a switch to MDR TB treatment.                                                                                                                                                                                                                                                                                                                                                                                                                                                                                                                                                                                                                            |
| 19 | Madan / 2018                                      |                                                                                                                                                                                                                                                                                                                                                                                                                                                                                                                                                                                                                                                                                                                                                                                                                                      |
| 20 | Unfavorable outcome (death, failure, LTF, NE)     | The primary analyses compared favorable versus unfavorable outcomes at end of treatment                                                                                                                                                                                                                                                                                                                                                                                                                                                                                                                                                                                                                                                                                                                                              |
| 21 | Mburu / 2018 - Unfavorable                        |                                                                                                                                                                                                                                                                                                                                                                                                                                                                                                                                                                                                                                                                                                                                                                                                                                      |
| 22 | Other composite outcome                           | The values of outcomes might be any values from 1 to 5 which means different outcomes. Value 1 means patient completed the treatment course in frame of DOTS, 2 means the patient has been cured, 3 means patients has quitted the course, 4 means patients has failed and finally 5 is a sign of dead as outcome of TB treatment course                                                                                                                                                                                                                                                                                                                                                                                                                                                                                             |
| 23 | Kalhari (fuzzy) / 2009                            |                                                                                                                                                                                                                                                                                                                                                                                                                                                                                                                                                                                                                                                                                                                                                                                                                                      |

## Supplemental File 7. Model presentation

| Study ID                           | Final model                                                                                                                                                                                                                                                                                                                                                                                                                                                                                                                                                                                                                                                                                                                                                                                                                                                                                                                                                                                                                                                                                                                                                                                                                                                                                                                      |
|------------------------------------|----------------------------------------------------------------------------------------------------------------------------------------------------------------------------------------------------------------------------------------------------------------------------------------------------------------------------------------------------------------------------------------------------------------------------------------------------------------------------------------------------------------------------------------------------------------------------------------------------------------------------------------------------------------------------------------------------------------------------------------------------------------------------------------------------------------------------------------------------------------------------------------------------------------------------------------------------------------------------------------------------------------------------------------------------------------------------------------------------------------------------------------------------------------------------------------------------------------------------------------------------------------------------------------------------------------------------------|
| Abdelbary / 2017 - Death           | 2 + 2*(Age 41-65) + 5*(Age>=65) + 2*(Male gender) + 4*(MDR TB) + 3*(HIV) + 3*(Malnutrition) + 2*(Alcoholism) + 2*(Male*diabetes) + 3*(HIV*pulmonary TB) - 1*(diabetes) - 1*(pulmonary TB)                                                                                                                                                                                                                                                                                                                                                                                                                                                                                                                                                                                                                                                                                                                                                                                                                                                                                                                                                                                                                                                                                                                                        |
| Abdelbary / 2017 - Failure         | 8*(No or low education) + 40*(MDR) + 10*(AFB smear +2) + 15*(AFB smear +3)                                                                                                                                                                                                                                                                                                                                                                                                                                                                                                                                                                                                                                                                                                                                                                                                                                                                                                                                                                                                                                                                                                                                                                                                                                                       |
| Abdelbary / 2017 - TB-DM / Death   | 2 + 3*(Male gender) + 3*(Malnutrition) - 1*(BCG vaccinated) - 1*(AFB smear positive)                                                                                                                                                                                                                                                                                                                                                                                                                                                                                                                                                                                                                                                                                                                                                                                                                                                                                                                                                                                                                                                                                                                                                                                                                                             |
| Abdelbary / 2017 - TB-DM / Default | 2 + 2*(Age<40) + 2*(Male gender) + 4*(HIV)                                                                                                                                                                                                                                                                                                                                                                                                                                                                                                                                                                                                                                                                                                                                                                                                                                                                                                                                                                                                                                                                                                                                                                                                                                                                                       |
| Aljohaney / 2018                   | Don't report final model, but show the beta coefficients. The coefficients are written as predictor (beta-coefficient): age 3 65 (2.497), congestive heart failure (1.231), bilateral disease on chest x-ray (1.192)                                                                                                                                                                                                                                                                                                                                                                                                                                                                                                                                                                                                                                                                                                                                                                                                                                                                                                                                                                                                                                                                                                             |
| Bastos / 2016                      | 3*(Hypoxemic respiratory failure) + 2*(Age>=50) + 1*(Bilateral involvement) + 1*(At least one of: HIV, diabetes, liver failure/cirrhosis, congestive heart failure, chronic respiratory disease) + 1*(Hemoglobin<12)                                                                                                                                                                                                                                                                                                                                                                                                                                                                                                                                                                                                                                                                                                                                                                                                                                                                                                                                                                                                                                                                                                             |
| Baussano / 2008                    | Nomogram with: residency status (residential vs. homeless), sex, geographic origin (non-EU vs. EU), case definition (other than definite vs. definite), treatment setting (inpatient and unknown vs. outpatient), age (continuous)                                                                                                                                                                                                                                                                                                                                                                                                                                                                                                                                                                                                                                                                                                                                                                                                                                                                                                                                                                                                                                                                                               |
| Belilovsky / 2010                  | -3.2 + 0.8*(male gender) + 0.7*(unemployment) + 0.4*(retreatment case) + 1.1*(alcohol abuse) + 0.6*(no data about alcohol) + 0.8*(severe TB form) - 0.3*(urban residence) + 0.4*(age 25-50) + 0.8*(pulmonary TB) + 0.5*(prison history)                                                                                                                                                                                                                                                                                                                                                                                                                                                                                                                                                                                                                                                                                                                                                                                                                                                                                                                                                                                                                                                                                          |
| Chang / 2004                       | Don't report final model. Just show odds ratios of predictors but don't report intercept term, which are written as predictor (OR) as follows: Current smokers (3.44), ex-smokers (2.48), history of default (10.74), no history of default (0.80),                                                                                                                                                                                                                                                                                                                                                                                                                                                                                                                                                                                                                                                                                                                                                                                                                                                                                                                                                                                                                                                                              |
| Chee / 2000                        | The OR for each predictor is as follow in the format predictor (OR): Non-Chinese race (8.08), Living with family vs. living alone/with friends (0.08), Treatment duration (1.85). Treatment duration is categorical as 6 months, 9 months, and >9 months, but only one OR is presented.                                                                                                                                                                                                                                                                                                                                                                                                                                                                                                                                                                                                                                                                                                                                                                                                                                                                                                                                                                                                                                          |
| Cherkaoui / 2014                   | 2 points for yes to the following questions: Are you younger than 50 years of age? Do you feel work is interfering with your ability to take TB treatment? Are you taking a retreatment regimen for TB? Do you or doctor think you are having moderate or severe side effects from TB treatment Are you required to get your TB treatment daily? Have you told your friends that you have TB? (1 point for no) Are you a current smoker (1 point for yes) Did you TB symptoms go away within 2 months of starting TB treatment (1 point for yes) Do you know how long your TB treatment is supposed to last (1 point for no) Have you ever smoked cigarettes (-1 point for no)                                                                                                                                                                                                                                                                                                                                                                                                                                                                                                                                                                                                                                                   |
| Costa-Veiga / 2017                 | Nomogram with: HIV, previous treatment, age class (25-44, 15-24, 45-64, >64), IV drug use, pathologies (other disease comorbidity: yes/no)                                                                                                                                                                                                                                                                                                                                                                                                                                                                                                                                                                                                                                                                                                                                                                                                                                                                                                                                                                                                                                                                                                                                                                                       |
| Gupta-Wright / 2019                | 9*(Male sex) + 7*(patient aged 55+) + 6*(currently taking ART) + 7*(unable to walk unaided) + 7*(hemoglobin <80, severe anemia) + 6*(positive on urine TB-LAM)                                                                                                                                                                                                                                                                                                                                                                                                                                                                                                                                                                                                                                                                                                                                                                                                                                                                                                                                                                                                                                                                                                                                                                   |
| Horita / 2013                      | 1*Age (years) + 10*(oxygen requirement) - 20*(albumin) + 5*(semi-dependent, ADL) + 10*(total dependent, ADL)                                                                                                                                                                                                                                                                                                                                                                                                                                                                                                                                                                                                                                                                                                                                                                                                                                                                                                                                                                                                                                                                                                                                                                                                                     |
| Hussain / 2019                     | None                                                                                                                                                                                                                                                                                                                                                                                                                                                                                                                                                                                                                                                                                                                                                                                                                                                                                                                                                                                                                                                                                                                                                                                                                                                                                                                             |
| Kalhari (fuzzy) / 2009             | Learned parameters by training set for each predictor written as predictor (learned parameter): Case type (0.467), treatment category (-0.079), risky sex (-0.945), prison (0.992), sex (0.400), recent TB infection (0.793), diabetes (2.445), low body weight (1.313), TB type (0.950), length (-0.235), previous imprisonment (2.398), age (0.237), area (0.8895), HIV (0.731)                                                                                                                                                                                                                                                                                                                                                                                                                                                                                                                                                                                                                                                                                                                                                                                                                                                                                                                                                |
| Kalhari (logistic) / 2010          | exp(-0.93 - 0.71*(gender) + 0.02*(age) - 0.02*(weight) + 0.5*(nationality) + 0.99*(prison) + 0.16*(case type))                                                                                                                                                                                                                                                                                                                                                                                                                                                                                                                                                                                                                                                                                                                                                                                                                                                                                                                                                                                                                                                                                                                                                                                                                   |
| Kalhari (predicting) / 2009        | exp(-1.58 - 0.12*(age) + 0.807*(gender) - 0.039*(nationality) - 0.263*(prison) + 0.15*(area) + 0.021*(weight))                                                                                                                                                                                                                                                                                                                                                                                                                                                                                                                                                                                                                                                                                                                                                                                                                                                                                                                                                                                                                                                                                                                                                                                                                   |
| Keane / 1997                       | Unclear. No constant term provided. Here are the predictor (OR): Mediastinal shift (2.1), average smear score (1.5), extensive lesions (3.6), any previous treatment (2.3), cavities (1.7), weight (0.98)                                                                                                                                                                                                                                                                                                                                                                                                                                                                                                                                                                                                                                                                                                                                                                                                                                                                                                                                                                                                                                                                                                                        |
| Killian / 2019                     | LEAP = Lstm rEal-time Adherence Predictor with 2 input layers, 1) LSTM with 64 hidden units and a dense layer with 48 units for the dense layer and 4 units for the penultimate layer                                                                                                                                                                                                                                                                                                                                                                                                                                                                                                                                                                                                                                                                                                                                                                                                                                                                                                                                                                                                                                                                                                                                            |
| Koegelenberg / 2015                | One point for each parameter: septic shock, HIV with CD4 < 200, creatinine > 140 (male) or >120 (female), P:F O2 ratio < 200, chest radiograph showing miliary pattern/parenchymal infiltrates, absence of TB treatment at admission                                                                                                                                                                                                                                                                                                                                                                                                                                                                                                                                                                                                                                                                                                                                                                                                                                                                                                                                                                                                                                                                                             |
| Luies / 2017                       | Written as predictor (OR): 3,5,-Dihydroxybenzoic acid (25.6), 3-(4-Hydroxy-3-methoxyphenyl) propionic acid (1.3)                                                                                                                                                                                                                                                                                                                                                                                                                                                                                                                                                                                                                                                                                                                                                                                                                                                                                                                                                                                                                                                                                                                                                                                                                 |
| Madan / 2018                       | Written as predictor (OR): New TB with 1+ smear grade (5.78), New TB with 2+ smear grade (2.69), New TB with 3+ smear grade (1.69), New TB without smear (1.67), New TB with smear positive, unknown grade (1.00), Previously treated, smear negative TB (1.35), previously treated with scanty smear (4.74), previously treated with 1+ smear grade (1.61), previously treated with 2+ smear grade (1.05), previously treated with 3+ smear grade (7.54), previously treated with no sputum smear (2.46), previously treated with unknown grade (30.37), pulmonary TB (1.83), pulmonary and extrapulmonary TB (5.86), HIV+ on ART with CD4 350-500 (8.09), HIV+ on ART with CD4 200-350 (6.14), HIV+ on ART with CD4 50-200 (16.35), HIV+ on ART with CD4 <50 (38.76), HIV+ not on ART with CD4 350-500 (53.44), HIV+ not on ART with CD4 200-350 (65.98), HIV+ not on ART with CD4 50-200 (6.94), HIV+ not on ART with CD4 <50 (49.20), HIV+ diagnosed after TB with CD4>500 (1.05), HIV+ diagnosed after TB with CD4 350-500 (2.49), HIV+ diagnosed after TB with CD4 200-350 (8.88), HIV+ diagnosed after TB with CD4 50-200 (6.79), HIV+ diagnosed after TB with CD4 <50 (13.99), Female 25-34 (9.41), Female 35-44 (1.75), Female >= 45 (4.49), Male 15-24 (10.63), Male 25-34 (2.74), Male 35-44 (2.9), Male >= 45 (3.96) |
| Mburu / 2018 - Failure             | Present relative scores for each covariate included with scores of 100, 72.61, 69.19, 55.39, 49.87, 48.74, 48.18, 46.51, 39.69, and 37.69 for hbA1c, regimen, age, weight, random blood glucose, BMI, BUN, HIV positive result, ever smoker, creatinine, respectively                                                                                                                                                                                                                                                                                                                                                                                                                                                                                                                                                                                                                                                                                                                                                                                                                                                                                                                                                                                                                                                            |
| Mburu / 2018 - Unfavorable         | Present relative scores for each covariate included, not sure if this was how it should be used. Relative scores are 100, 79.38, 70.09, 63.93, 62.47, 62.63, 61.63, 55.62, 39.21, 34.48 for hbA1c, regimen, creatinine, BMI, BUN, weight, age, random blood glucose, HIV positive result, male gender, respectively                                                                                                                                                                                                                                                                                                                                                                                                                                                                                                                                                                                                                                                                                                                                                                                                                                                                                                                                                                                                              |
| Nguyen (general pop) / 2018        | 6*[Age 45-64] + 12*[Age>65] + 2*[US born] + 2*[Homeless] + 4*[Resident of LTCF] + 8*[Chronic kidney failure] + 10*[Meningeal TB] + 4*[Miliary TB] + 6*[TB-CXR] + 6*[HIV positive] + 6*[HIV unknown]                                                                                                                                                                                                                                                                                                                                                                                                                                                                                                                                                                                                                                                                                                                                                                                                                                                                                                                                                                                                                                                                                                                              |
| Nguyen (TB-DM) / 2019              | 16*[Age >= 65] + 5*[US-born] + 11*[Homeless] + 20*[IDU] + 20*[Chronic kidney failure] + 20*[TB meningitis] + 13*[Miliary TB] + 6*[AFB positive smear] + 24*[Positive HIV]                                                                                                                                                                                                                                                                                                                                                                                                                                                                                                                                                                                                                                                                                                                                                                                                                                                                                                                                                                                                                                                                                                                                                        |
| Nguyen (TB-HIV) / 2018             | Prognostic score: 5*[Age >= 65] + 12*[Resident of LTCF] + 9*[Meningeal TB] + 6*[abnormal CXR] + 9*[diagnosis confirmed with positive culture or NAA] + 10*[culture not converted or unknown]                                                                                                                                                                                                                                                                                                                                                                                                                                                                                                                                                                                                                                                                                                                                                                                                                                                                                                                                                                                                                                                                                                                                     |

|    |                    |                                                                                                                                                                                                                                                                                                |
|----|--------------------|------------------------------------------------------------------------------------------------------------------------------------------------------------------------------------------------------------------------------------------------------------------------------------------------|
| 1  |                    | Model: $-6.994499 + 1.069024 * [\text{Age} \geq 65] + 2.541147 * [\text{Resident of LTCF}] + 1.998852 * [\text{Meningeal TB}] + 1.37995 * [\text{abnormal CXR}] + 1.899108 * [\text{diagnosis confirmed with positive culture or NAA}] + 2.186305 * [\text{culture not converted or unknown}]$ |
| 2  | Pefura-Yone / 2017 | $1 / (1 + \exp(-1.3120 + 0.0474 * [\text{age}] - 0.1866 * [\text{adjusted BMI}] + 1.1637 * [\text{PTB-}] + 0.5418 * [\text{ETB}] + 1.3820 * [\text{HIV}]))$                                                                                                                                    |
| 3  | Podlekareva / 2013 | $1 * [\text{DST performed}] + 2 * [\text{Initial treatment with RHZ}] + 2 * [\text{cART started before or up to 1 month after TB diagnosis}]$                                                                                                                                                  |
| 4  | Rodrigo / 2012     | $1 * [\text{Immigrant}] + 1 * [\text{Living alone}] + 1 * [\text{Living in an institution}] + 2 * [\text{Previous TB treatment}] + 2 * [\text{Linguistic barriers}] + 4 * [\text{IV drug use}] + 1 * [\text{Unknown IV drug use}]$                                                             |
| 6  | Sauer / 2018       | Negatively correlated: drug sensitivity (sensitive), employment status (employed), microscopy: 1 to 99 acid-resistant bacteria in 100 fields of view when stained by Ziehl-Nielsen, dissemination (diffuse pulmonary nodules detected)                                                         |
| 8  | Thompson / 2017    | Heatmap of differentially expressed genes                                                                                                                                                                                                                                                      |
| 9  | Valade / 2012      | Sum of three parameters: military tuberculosis (yes: +1, no: 0), required mechanical ventilation on ICU admission (yes: +1, no: 0), and required vasopressor infusion (yes: +1, no: 0).                                                                                                        |
| 11 | Wang / 2019        | Unknown                                                                                                                                                                                                                                                                                        |
| 12 | Wejse / 2008       | 1 point for each variable: cough, hemoptysis, dyspnea, chest pain, night sweating, anemia conjunctivae, tachycardia, positive funding at lung auscultation, temperature >37, BMI <18, BMI <16, MUAC <220, MUAC <200                                                                            |
| 13 | Zhang / 2019       | $2 * [\text{Anemia (HGB} < 90\text{g/L)}] + 2 * [\text{Tuberculous meningitis}] + 5 * [\text{Severe pneumonia}] + 2 * [\text{Hypoalbuminemia}] + 7 * [\text{Unexplained infections or space-occupying lesions}] + 5 * [\text{Malignancies}]$                                                   |

For peer review only

**Supplemental File 8.** Comparison of model performance and quality by population characteristics.

For each analysis below, results were stratified on the basis of whether the study population included, excluded, or did not report on two population characteristics of interest: MDR and younger age group (minimum age <18 vs. minimum age ≥18).

*Note:* The unit of measure for these analyses is the model (N=37) not the study (N=33), which explains differences in numbers between this and Table 4 of the main manuscript.

## A) MDR

|                                              | <b>Included<br/>(N=11)</b>                                                                             | <b>Excluded<br/>(N= 7)</b>                                                                               | <b>Unknown<br/>(N=19)</b>                                          |
|----------------------------------------------|--------------------------------------------------------------------------------------------------------|----------------------------------------------------------------------------------------------------------|--------------------------------------------------------------------|
| <b>Prevalence of MDR, Median [IQR]</b>       | 1% [1%-1%]                                                                                             | 0% [0%-0%]                                                                                               |                                                                    |
| <b>C-statistic, Median [IQR]</b>             | 0.77 [0.69-0.81]                                                                                       | 0.77 [0.73-0.81]                                                                                         | 0.75 [0.69-0.85]                                                   |
| <i>Unknown</i>                               | 1                                                                                                      | 3                                                                                                        | 4                                                                  |
| <b>Outcome</b>                               |                                                                                                        |                                                                                                          |                                                                    |
| Death                                        | 7 (64%)                                                                                                | 1 (14%)                                                                                                  | 8 (42%)                                                            |
| Treatment failure                            | 2 (18%)                                                                                                | 1 (14%)                                                                                                  | 3 (16%)                                                            |
| Default, LTF, or treatment interruption      | 1 (9.1%)                                                                                               | 2 (29%)                                                                                                  | 3 (16%)                                                            |
| Composite outcome*                           | 1 (9.1%)                                                                                               | 3 (43%)                                                                                                  | 5 (26%)                                                            |
| <b>Risk of Bias (Population)</b>             |                                                                                                        |                                                                                                          |                                                                    |
| Low                                          | 6 (55%)                                                                                                | 4 (57%)                                                                                                  | 11 (58%)                                                           |
| High                                         | 0 (0%)                                                                                                 | 2 (29%)                                                                                                  | 4 (21%)                                                            |
| Unclear                                      | 5 (45%)                                                                                                | 1 (14%)                                                                                                  | 4 (21%)                                                            |
| <b>Risk of Bias (Predictors)</b>             |                                                                                                        |                                                                                                          |                                                                    |
| Low                                          | 1 (9.1%)                                                                                               | 3 (43%)                                                                                                  | 9 (47%)                                                            |
| High                                         | 5 (45%)                                                                                                | 0 (0%)                                                                                                   | 5 (26%)                                                            |
| Unclear                                      | 5 (45%)                                                                                                | 4 (57%)                                                                                                  | 5 (26%)                                                            |
| <b>Risk of Bias (Outcomes)</b>               |                                                                                                        |                                                                                                          |                                                                    |
| Low                                          | 5 (45%)                                                                                                | 4 (57%)                                                                                                  | 12 (63%)                                                           |
| High                                         | 0 (0%)                                                                                                 | 1 (14%)                                                                                                  | 3 (16%)                                                            |
| Unclear                                      | 6 (55%)                                                                                                | 2 (29%)                                                                                                  | 4 (21%)                                                            |
| <b>Risk of Bias (Analysis)</b>               |                                                                                                        |                                                                                                          |                                                                    |
| Low                                          | 0 (0%)                                                                                                 | 0 (0%)                                                                                                   | 0 (0%)                                                             |
| High                                         | 11 (100%)                                                                                              | 7 (100%)                                                                                                 | 19 (100%)                                                          |
| Unclear                                      | 0 (0%)                                                                                                 | 0 (0%)                                                                                                   | 0 (0%)                                                             |
| <b>Top 5 predictors included<sup>^</sup></b> | Age (7), x-ray findings (5), extrapulmonary TB (4), HIV (4), other comorbidities (4), smear result (4) | Nationality (3), Age (2), HIV (2), living situation (2), previous TB (2), sex (2), treatment regimen (2) | Age (12), previous TB (9), BMI (8), extrapulmonary TB (6), sex (6) |

Abbreviations: BMI=body mass index, LTF=losses to follow-up, MDR=multi-drug resistance, TB=tuberculosis

\*Composite outcome includes unfavorable outcome (combination of death, failure, and default/LTF/treatment interruption) or treatment success (combination of cure and treatment completion)

<sup>^</sup>Witten as predictor (number of models included in). Top 5 unless there was a tie, in which case more predictors were listed.

**Summary:** Overall, the study population for 11 models included individuals with MDR, whereas 7 excluded patients with MDR, and the inclusion of MDR was unknown in 19 models. In models that included patients with MDR, the overall prevalence of MDR was low, with a median 1% prevalence. Model performance, as measured by the c-statistic, of studies that included and excluded patients with MDR was comparable and both were slightly higher than in studies where the prevalence of MDR was unknown. There were notable differences in outcome definition for the studies that included vs. excluded MDR patients, such as most studies that included patients with MDR examined death as the primary endpoint, whereas studies that excluded patients with MDR were more likely to use a composite outcome or evaluate default/LTF/treatment interruptions. Risk of bias assessment for the population and analysis domains were similar between all groups, but studies that included patients with MDR seemed to have higher amounts of bias in the predictors domain and more unclear risk of bias in the outcomes domain. For all groups, age was an important predictor of treatment outcome, but the other frequently included predictors varied between groups.

## B) Age &lt;18

|                                              | Included<br>(N=10)                                                      | Excluded<br>(N= 11)                                                                                                             | Unknown<br>(N=16)                                                                                               |
|----------------------------------------------|-------------------------------------------------------------------------|---------------------------------------------------------------------------------------------------------------------------------|-----------------------------------------------------------------------------------------------------------------|
| <b>Minimum age</b>                           |                                                                         |                                                                                                                                 |                                                                                                                 |
| 15                                           | 8 (80%)                                                                 | 0 (0%)                                                                                                                          | -                                                                                                               |
| 16                                           | 1 (10%)                                                                 | 0 (0%)                                                                                                                          | -                                                                                                               |
| 17                                           | 1 (10%)                                                                 | 0 (0%)                                                                                                                          | -                                                                                                               |
| 18                                           | 0 (0%)                                                                  | 10 (91%)                                                                                                                        | -                                                                                                               |
| 20                                           | 0 (0%)                                                                  | 1 (9.1%)                                                                                                                        | -                                                                                                               |
| <b>Age<sup>#</sup>, Median [IQR]</b>         | 34 [32-38]                                                              | 43 [43-50]                                                                                                                      | 44 [40-49]                                                                                                      |
| <i>Unknown</i>                               | 4                                                                       | 3                                                                                                                               | 8                                                                                                               |
| <b>C-statistic, Median [IQR]</b>             | 0.78 (0.65, 0.80)                                                       | 0.70 (0.68, 0.84)                                                                                                               | 0.75 (0.74, 0.85)                                                                                               |
| <i>Unknown</i>                               | 1                                                                       | 0                                                                                                                               | 7                                                                                                               |
| <b>Outcome</b>                               |                                                                         |                                                                                                                                 |                                                                                                                 |
| Death                                        | 5 (50%)                                                                 | 7 (64%)                                                                                                                         | 4 (25%)                                                                                                         |
| Treatment failure                            | 2 (20%)                                                                 | 1 (9.1%)                                                                                                                        | 3 (19%)                                                                                                         |
| Default, LTF, or treatment interruption      | 0 (0%)                                                                  | 3 (27%)                                                                                                                         | 3 (19%)                                                                                                         |
| Composite outcome*                           | 3 (30%)                                                                 | 0 (0%)                                                                                                                          | 6 (38%)                                                                                                         |
| <b>Risk of Bias (Population)</b>             |                                                                         |                                                                                                                                 |                                                                                                                 |
| Low                                          | 10 (100%)                                                               | 9 (82%)                                                                                                                         | 2 (12%)                                                                                                         |
| High                                         | 0 (0%)                                                                  | 0 (0%)                                                                                                                          | 6 (38%)                                                                                                         |
| Unclear                                      | 0 (0%)                                                                  | 2 (18%)                                                                                                                         | 8 (50%)                                                                                                         |
| <b>Risk of Bias (Predictors)</b>             |                                                                         |                                                                                                                                 |                                                                                                                 |
| Low                                          | 6 (60%)                                                                 | 5 (45%)                                                                                                                         | 2 (12%)                                                                                                         |
| High                                         | 2 (20%)                                                                 | 5 (45%)                                                                                                                         | 3 (19%)                                                                                                         |
| Unclear                                      | 2 (20%)                                                                 | 1 (9.1%)                                                                                                                        | 11 (69%)                                                                                                        |
| <b>Risk of Bias (Outcomes)</b>               |                                                                         |                                                                                                                                 |                                                                                                                 |
| Low                                          | 8 (80%)                                                                 | 9 (82%)                                                                                                                         | 4 (25%)                                                                                                         |
| High                                         | 0 (0%)                                                                  | 1 (9.1%)                                                                                                                        | 3 (19%)                                                                                                         |
| Unclear                                      | 2 (20%)                                                                 | 1 (9.1%)                                                                                                                        | 9 (56%)                                                                                                         |
| <b>Risk of Bias (Analysis)</b>               |                                                                         |                                                                                                                                 |                                                                                                                 |
| Low                                          | 0 (0%)                                                                  | 0 (0%)                                                                                                                          | 0 (0%)                                                                                                          |
| High                                         | 10 (100%)                                                               | 11 (100%)                                                                                                                       | 16 (100%)                                                                                                       |
| Unclear                                      | 0 (0%)                                                                  | 0 (0%)                                                                                                                          | 0 (0%)                                                                                                          |
| <b>Top 5 predictors included<sup>^</sup></b> | Age (7), HIV (5), BMI (4),<br>extrapulmonary TB (4),<br>previous TB (4) | Age (7), sex (5),<br>extrapulmonary TB (4),<br>hemoglobin (3), HIV (3),<br>MDR (3), other lab values<br>(3), x-ray findings (3) | Age (7), nationality (5),<br>previous TB (5), BMI (4),<br>sex (4), treatment regimen<br>(4), x-ray findings (4) |

Abbreviations: BMI=body mass index, LTF=losses to follow-up

<sup>#</sup>Based on measure of central tendency reported in the study

\*Composite outcome includes unfavorable outcome (combination of death, failure, and default/LTF/treatment interruption) or treatment success (combination of cure and treatment completion)

<sup>^</sup>Witten as predictor (number of models included in). Top 5 unless there was a tie, in which case more predictors were listed.

**Summary:** In total, the study population of 10 models included individuals younger than 18, 11 had a minimum age of 18, and the minimum age of participants was not reported for 16 models. The age distribution of studies that included patients less than 18 was lower than that of studies with a minimum age of 18 or unreported minimum age. The c-statistic of studies that included younger patients (minimum age <18) was seemingly higher than studies with a minimum age of 18. Treatment outcome definitions varied between groups, such that none of the studies including younger patients examined default/LTF/treatment interruption as an outcome and none of the studies with age 18 as the minimum age used a composite outcome. Risk of bias for the population and predictors domain was somewhat lower for studies with a younger age population, and studies with unknown minimum age were more likely to be regarded as having unclear risk of bias. Across all groups, age was the most important predictor of outcome, but other important predictors varied between groups.

| Section/topic                      | #  | Checklist item                                                                                                                                                                                                                                                                                              | Reported on page #            |
|------------------------------------|----|-------------------------------------------------------------------------------------------------------------------------------------------------------------------------------------------------------------------------------------------------------------------------------------------------------------|-------------------------------|
| <b>TITLE</b>                       |    |                                                                                                                                                                                                                                                                                                             |                               |
| Title                              | 1  | Identify the report as a systematic review, meta-analysis, or both.                                                                                                                                                                                                                                         | 1                             |
| <b>ABSTRACT</b>                    |    |                                                                                                                                                                                                                                                                                                             |                               |
| Structured summary                 | 2  | Provide a structured summary including, as applicable: background; objectives; data sources; study eligibility criteria, participants, and interventions; study appraisal and synthesis methods; results; limitations; conclusions and implications of key findings; systematic review registration number. | 3                             |
| <b>INTRODUCTION</b>                |    |                                                                                                                                                                                                                                                                                                             |                               |
| Rationale                          | 3  | Describe the rationale for the review in the context of what is already known.                                                                                                                                                                                                                              | 5-6                           |
| Objectives                         | 4  | Provide an explicit statement of questions being addressed with reference to participants, interventions, comparisons, outcomes, and study design (PICOS).                                                                                                                                                  | Supplemental File 2           |
| <b>METHODS</b>                     |    |                                                                                                                                                                                                                                                                                                             |                               |
| Protocol and registration          | 5  | Indicate if a review protocol exists, if and where it can be accessed (e.g., Web address), and, if available, provide registration information including registration number.                                                                                                                               | Abstract and p. 7             |
| Eligibility criteria               | 6  | Specify study characteristics (e.g., PICOS, length of follow-up) and report characteristics (e.g., years considered, language, publication status) used as criteria for eligibility, giving rationale.                                                                                                      | 7-8                           |
| Information sources                | 7  | Describe all information sources (e.g., databases with dates of coverage, contact with study authors to identify additional studies) in the search and date last searched.                                                                                                                                  | 8                             |
| Search                             | 8  | Present full electronic search strategy for at least one database, including any limits used, such that it could be repeated.                                                                                                                                                                               | Supplemental file 3           |
| Study selection                    | 9  | State the process for selecting studies (i.e., screening, eligibility, included in systematic review, and, if applicable, included in the meta-analysis).                                                                                                                                                   | 8-9                           |
| Data collection process            | 10 | Describe method of data extraction from reports (e.g., piloted forms, independently, in duplicate) and any processes for obtaining and confirming data from investigators.                                                                                                                                  | 8-9                           |
| Data items                         | 11 | List and define all variables for which data were sought (e.g., PICOS, funding sources) and any assumptions and simplifications made.                                                                                                                                                                       | 9; Supplemental Files 4 and 5 |
| Risk of bias in individual studies | 12 | Describe methods used for assessing risk of bias of individual studies (including specification of whether this was done at the study or outcome level), and how this information is to be used in any data synthesis.                                                                                      | 9; Supplemental File 5        |
| Summary measures                   | 13 | State the principal summary measures (e.g., risk ratio, difference in means).                                                                                                                                                                                                                               | N/A                           |
| Synthesis of results               | 14 | Describe the methods of handling data and combining results of studies, if done, including measures of consistency (e.g., $I^2$ ) for each meta-analysis.                                                                                                                                                   | 8-9                           |
| Risk of bias across studies        | 15 | Specify any assessment of risk of bias that may affect the cumulative evidence (e.g., publication bias, selective reporting within studies).                                                                                                                                                                | N/A                           |
| Additional analyses                | 16 | Describe methods of additional analyses (e.g., sensitivity or subgroup analyses, meta-regression), if done, indicating which were pre-specified.                                                                                                                                                            | N/A                           |
| <b>RESULTS</b>                     |    |                                                                                                                                                                                                                                                                                                             |                               |
| Study selection                    | 17 | Give numbers of studies screened, assessed for eligibility, and included in the review, with reasons for exclusions at each stage, ideally with a flow diagram.                                                                                                                                             | 11; Figure 1                  |
| Study characteristics              | 18 | For each study, present characteristics for which data were extracted (e.g., study size, PICOS, follow-up period) and provide the citations.                                                                                                                                                                | 11-13; Table 3, 4, 5          |

|                               |    |                                                                                                                                                                                                          |                        |
|-------------------------------|----|----------------------------------------------------------------------------------------------------------------------------------------------------------------------------------------------------------|------------------------|
| Risk of bias within studies   | 19 | Present data on risk of bias of each study and, if available, any outcome level assessment (see item 12).                                                                                                | 13-14; Figures 3 and 4 |
| Results of individual studies | 20 | For all outcomes considered (benefits or harms), present, for each study: (a) simple summary data for each intervention group (b) effect estimates and confidence intervals, ideally with a forest plot. | 11-14; Table 2         |
| Synthesis of results          | 21 | Present results of each meta-analysis done, including confidence intervals and measures of consistency.                                                                                                  | N/A                    |
| Risk of bias across studies   | 22 | Present results of any assessment of risk of bias across studies (see Item 15).                                                                                                                          | N/A                    |
| Additional analysis           | 23 | Give results of additional analyses, if done (e.g., sensitivity or subgroup analyses, meta-regression [see Item 16]).                                                                                    | N/A                    |
| <b>DISCUSSION</b>             |    |                                                                                                                                                                                                          |                        |
| Summary of evidence           | 24 | Summarize the main findings including the strength of evidence for each main outcome; consider their relevance to key groups (e.g., healthcare providers, users, and policy makers).                     | 15-19                  |
| Limitations                   | 25 | Discuss limitations at study and outcome level (e.g., risk of bias), and at review-level (e.g., incomplete retrieval of identified research, reporting bias).                                            | 18                     |
| Conclusions                   | 26 | Provide a general interpretation of the results in the context of other evidence, and implications for future research.                                                                                  | 19                     |
| <b>FUNDING</b>                |    |                                                                                                                                                                                                          |                        |
| Funding                       | 27 | Describe sources of funding for the systematic review and other support (e.g., supply of data); role of funders for the systematic review.                                                               | 20                     |
